# Supplementary material
Source: HighWire-hosted journal article supplement (https://www.jneurosci.org/content/40/5/958)
Supplement: inline-supplementary-material-6 [file inline-supplementary-material-6.xls]

## Sheet: Figure 1-2
ENTREZID	SYMBOL	rpkm.EXC	rpkm.PV	rpkm.SST	rpkm.VIP	lfc.EXC.vs.PV	adj.p.EXC.vs.PV	pval.EXC.vs.PV	lfc.EXC.vs.SST	adj.p.EXC.vs.SST	pval.EXC.vs.SST	lfc.EXC.vs.VIP	adj.p.EXC.vs.VIP	pval.EXC.vs.VIP	lfc.PV.vs.SST	adj.p.PV.vs.SST	pval.PV.vs.SST	lfc.PV.vs.VIP	adj.p.PV.vs.VIP	pval.PV.vs.VIP	lfc.SST.vs.VIP	adj.p.SST.vs.VIP	pval.SST.vs.VIP
71661	0610005C13Rik	0	0	0.0351761	0	0	1	1	0	1	1	0	1	1	0	1	1	0	1	1	0	1	1
76253	0610006L08Rik	0	0	0	0	0	1	1	0	1	1	0	1	1	0	1	1	0	1	1	0	1	1
66050	0610009B22Rik	8.85807	15.6563	11.52	9.52342	-0.771418	0.00686396	0.001489	-0.329294	0.104975	0.0448105	-0.067527	0.824739	0.744917	0.442601	0.029959	0.00993593	0.703267	0.0113759	0.00412554	0.264361	0.196002	0.113943
66838	0610009L18Rik	0.16101	0.827044	0.252873	0.370245	0	1	1	0	1	1	0	1	1	0	1	1	0	1	1	0	1	1
66839	0610009O20Rik	3.36278	4.81197	2.71817	2.68975	-0.59149	0.184135	0.0951591	0.184484	0.613861	0.480577	0.138322	0.727392	0.621434	0.771963	0.012626	0.00341602	0.738752	0.0178887	0.0072376	-0.0372519	0.878594	0.825276
100039060	0610010B08Rik	0	0	0	0	0	1	1	0	1	1	0	1	1	0	1	1	0	1	1	0	1	1
71675	0610010F05Rik	4.98386	8.90721	8.63766	8.63467	-0.813918	0.00872112	0.00199106	-0.777399	0.0139239	0.00328788	-0.74506	0.0609087	0.0221995	0.0398505	0.877042	0.813461	0.0647843	0.845942	0.800647	0.0217488	0.954196	0.933357
104457	0610010K14Rik	2.87076	3.02431	3.84566	4.16201	-0.523608	0.595702	0.46738	-0.884895	0.193618	0.0998059	-0.973243	0.176413	0.0903728	-0.363677	0.426317	0.293992	-0.443579	0.247715	0.176947	-0.0847925	0.794495	0.716172
106264	0610012G03Rik	2.97913	5.0489	2.75635	2.09144	-0.895474	0.0525347	0.0190863	0.075692	0.876578	0.813842	0.406033	0.412478	0.28128	0.970248	0.00582392	0.00132114	1.30872	0.00134157	0.000287011	0.333496	0.349829	0.239869
78687	0610025J13Rik	0	0	0	0	0	1	1	0	1	1	0	1	1	0	1	1	0	1	1	0	1	1
68364	0610030E20Rik	2.03148	1.36258	1.35935	2.26844	0.926103	0.185726	0.0961372	0.733696	0.122373	0.0547162	-0.0313433	0.958556	0.934377	-0.190528	0.636892	0.514164	-0.959702	0.0126785	0.00473735	-0.760655	0.012581	0.00357275
68369	0610031O16Rik	0	0	0	0	0	1	1	0	1	1	0	1	1	0	1	1	0	1	1	0	1	1
74093	0610033M10Rik	0	0	0	0	0	1	1	0	1	1	0	1	1	0	1	1	0	1	1	0	1	1
74098	0610037L13Rik	4.81375	6.58241	4.03892	8.95816	-0.645764	0.0389019	0.0130438	0.175347	0.567779	0.430896	-0.930057	0.00334877	0.000546298	0.821129	0.00240763	0.000447377	-0.289717	0.218102	0.152025	-1.1011	0.000165146	1.40221e-05
70345	0610038B21Rik	0.140997	0	0.101794	0.0261519	0	1	1	0	1	1	0	1	1	0	1	1	0	1	1	0	1	1
68397	0610039H22Rik	0.149573	0.0733511	0.0332477	0.274789	0	1	1	0	1	1	-1.23837	0.388827	0.25934	0	1	1	-0.974848	0.340238	0.259606	-2.63274	0.00940987	0.00244147
68386	0610039K10Rik	0.982553	0.774151	0.688758	0.92714	0.23923	0.778111	0.687113	0.581382	0.297335	0.176722	0.0220901	0.976017	0.961602	0.346345	0.586355	0.4578	-0.210753	0.745356	0.680401	-0.551323	0.187309	0.107706
67672	0610040B10Rik	1.02997	0.309762	0.969786	0.708351	0	1	1	-0.40417	0.71261	0.598694	0	1	1	-0.213612	0.794722	0.705441	0	1	1	0.268083	0.638761	0.531094
75394	0610040F04Rik	0.592017	0.528076	0.221265	0.247503	0.0659936	0.947425	0.916665	1.16167	0.0990278	0.0415436	0.945899	0.257852	0.148503	1.11048	0.0350862	0.0121262	0	1	1	-0.22995	0.698186	0.59918
76261	0610040J01Rik	0.044644	0.18312	0.00820532	0.0153703	0	1	1	0	1	1	0	1	1	0	1	1	0	1	1	0	1	1
68400	0610043K17Rik	2.77278	2.13571	3.38296	2.05572	0.455143	0.52936	0.39596	-0.0334248	0.951728	0.92262	0.641132	0.268126	0.156635	-0.489901	0.373542	0.246939	0.193461	0.760172	0.697514	0.68143	0.102848	0.0504401
68434	1010001N08Rik	0	0	0	0	0	1	1	0	1	1	0	1	1	0	1	1	0	1	1	0	1	1
75405	1100001I12Rik	0	0	0	0	0	1	1	0	1	1	0	1	1	0	1	1	0	1	1	0	1	1
102634333	1110002E22Rik	0.774856	0.0337065	0.113225	0.585186	4.60043	0.000422625	4.94087e-05	3.15825	6.81749e-06	2.38379e-07	0.684707	0.103872	0.044698	-1.44838	0.0244298	0.00772747	-3.91392	3.2278e-05	2.89007e-06	-2.47284	1.60339e-06	4.37857e-08
68488	1110002J07Rik	0	0	0.0312558	0	0	1	1	0	1	1	0	1	1	0	1	1	0	1	1	0	1	1
100043040	1110002L01Rik	2.86106	5.29576	4.35605	5.01467	-0.834845	0.00204411	0.000341977	-0.642787	0.00756496	0.00153435	-0.727876	0.00757764	0.00153244	0.190738	0.335257	0.213543	0.112792	0.594215	0.514632	-0.0871497	0.668542	0.564922
68483	1110002O04Rik	0	0	0	0	0	1	1	0	1	1	0	1	1	0	1	1	0	1	1	0	1	1
68001	1110004E09Rik	12.0792	18.0583	12.4441	7.23534	-0.383019	0.260479	0.150827	-0.0291055	0.922752	0.879718	0.881848	0.0242382	0.00673436	0.348436	0.12105	0.0569665	1.28037	0.00112011	0.000229192	0.916575	0.00276249	0.000510622
56372	1110004F10Rik	12.4383	15.5702	20.4742	19.4398	-0.483504	0.170274	0.086082	-0.885561	0.00421728	0.000738911	-0.762882	0.0247678	0.006919	-0.401929	0.018558	0.0055016	-0.278723	0.163877	0.107704	0.125369	0.49388	0.376963
66123	1110006O24Rik	0	0.0798343	0.025695	0.100147	0	1	1	0	1	1	0	1	1	0	1	1	0	1	1	0	1	1
67388	1110008F13Rik	7.93214	12.8465	6.76942	6.58772	-0.899874	0.0183397	0.00502646	0.0551729	0.879305	0.818115	0.251977	0.515763	0.380854	0.955826	0.000511625	6.8543e-05	1.1479	0.000685062	0.000120927	0.186634	0.464582	0.347178
66132	1110008L16Rik	2.67936	3.10958	2.82314	2.68042	0.0285969	0.95145	0.922255	0.194401	0.522521	0.381927	0.330698	0.363327	0.236147	0.169483	0.493588	0.359814	0.302692	0.288113	0.212538	0.131663	0.586988	0.473836
73737	1110008P14Rik	16.9917	10.5627	6.62111	3.4318	0.581558	0.357233	0.230587	1.11187	0.0100632	0.0021775	2.09841	0.00155419	0.000213263	0.527797	0.170133	0.0878597	1.52093	0.00333029	0.000895461	0.989058	0.00614941	0.00141388
68618	1110012L19Rik	1.15451	2.05081	1.72713	1.54123	-1.36121	0.252801	0.145029	-1.36106	0.139072	0.0647161	-1.08484	0.308148	0.189304	0.00219088	0.997027	0.995132	0.275102	0.597858	0.518765	0.271416	0.482665	0.364935
100503859	1110015O18Rik	0	0	0.388319	0.10291	0	1	1	-3.40248	0.000863506	0.000101576	0	1	1	-1.92415	0.0138721	0.00385604	0	1	1	1.27893	0.168873	0.0946583
73721	1110017D15Rik	0.0216999	1.28167	0.157366	0.232209	-4.64283	0.00102328	0.000146872	-1.64896	0.092026	0.0377744	0	1	1	2.99926	0.000146555	1.51387e-05	0	1	1	-0.352296	0.57522	0.46081
68941	1110018N20Rik	0.344629	0.116947	0.269172	0.61337	1.38512	0.20039	0.106155	0.453248	0.563301	0.426033	-0.279595	0.745469	0.64407	-0.9422	0.191901	0.102963	-1.66019	0.0381804	0.0183848	-0.704664	0.207208	0.122412
76311	1110019D14Rik	0.768441	0.543759	0.512298	0.964231	-0.494168	0.736782	0.636175	-0.587776	0.596699	0.462301	-0.824143	0.544987	0.410407	-0.111296	0.875261	0.810127	-0.34473	0.719227	0.650949	-0.208147	0.787942	0.708167
68531	1110020A21Rik	0.269318	0.293467	0.0965616	0.614292	0	1	1	0	1	1	-2.10314	0.0808472	0.032139	0	1	1	0	1	1	0	1	1
68637	1110025L11Rik	0	0	0	0	0	1	1	0	1	1	0	1	1	0	1	1	0	1	1	0	1	1
68690	1110028F11Rik	0	0	0	0.0284336	0	1	1	0	1	1	0	1	1	0	1	1	0	1	1	0	1	1
68692	1110028F18Rik	0	0	0	0	0	1	1	0	1	1	0	1	1	0	1	1	0	1	1	0	1	1
68721	1110032A03Rik	4.59141	11.3376	7.1313	6.48299	-1.54017	0.00429001	0.000846055	-0.895832	0.043973	0.0143854	-0.798614	0.104477	0.0450836	0.639717	0.00191793	0.00033828	0.749558	0.00258937	0.000656097	0.103802	0.634777	0.526289
68725	1110032F04Rik	1.07096	0.133258	2.37841	1.61626	2.70091	0.0112475	0.00276246	-1.07831	0.0241085	0.00662227	-0.665902	0.16566	0.0831332	-3.74502	3.02627e-05	2.25856e-06	-3.36468	7.99299e-05	8.60876e-06	0.401653	0.176871	0.100357
73747	1110034G24Rik	0.91767	0.913634	0.505812	0.95302	0.368278	0.659129	0.543315	0.6222	0.254194	0.143842	0.00159041	0.998548	0.9971	0.2382	0.728323	0.620419	-0.373052	0.548691	0.466436	-0.612773	0.136782	0.0723339
68697	1110036E04Rik	0	0	0	0	0	1	1	0	1	1	0	1	1	0	1	1	0	1	1	0	1	1
68763	1110038B12Rik	3.13149	2.0816	3.50875	4.95281	0.638945	0.369575	0.241834	-0.109149	0.827313	0.749151	-0.519085	0.335831	0.212833	-0.734214	0.110939	0.0509549	-1.16165	0.0381028	0.0183202	-0.403451	0.224334	0.135347
117171	1110038F14Rik	1.23352	1.26388	1.01063	1.46949	-0.153192	0.818229	0.737348	0.489498	0.305244	0.183142	0.0885702	0.889394	0.834039	0.647051	0.18275	0.0964837	0.239543	0.670703	0.597138	-0.402983	0.358016	0.247341
68808	1110046J04Rik	1.24139	0.815824	0.782432	0.881782	0.0644345	0.965192	0.942643	0.274013	0.745508	0.640596	0.0345763	0.973625	0.957171	0.180802	0.834788	0.755177	-0.0398605	0.962065	0.949252	-0.223793	0.62075	0.510212
228356	1110051M20Rik	3.8047	4.01415	3.48422	2.67248	-0.137606	0.5697	0.438752	0.110064	0.600314	0.465967	0.451405	0.0433483	0.0143784	0.247096	0.196568	0.106021	0.582126	0.00611456	0.00190177	0.348415	0.0474035	0.0191945
68844	1110057P08Rik	0	0	0	0	0	1	1	0	1	1	0	1	1	0	1	1	0	1	1	0	1	1
68771	1110058D11Rik	0	0	0.361478	0.770692	0	1	1	0	1	1	0	1	1	0	1	1	0	1	1	0	1	1
66206	1110059E24Rik	9.2847	12.8639	10.6844	11.3544	-0.741154	0.0713708	0.0280573	-0.335397	0.348802	0.219103	-0.487978	0.221108	0.121521	0.404682	0.0847237	0.0362395	0.259893	0.330533	0.250846	-0.151146	0.562415	0.447313
66202	1110059G10Rik	2.11292	1.22868	2.37111	2.0415	0.749609	0.230634	0.127916	-0.190444	0.648192	0.518102	-0.03172	0.953047	0.925942	-0.941062	0.00579863	0.00131084	-0.780109	0.0266957	0.0119111	0.161245	0.495265	0.378664
68920	1110065P20Rik	3.60194	4.10807	2.49707	2.01314	-0.252628	0.599144	0.472055	0.631133	0.103206	0.0438587	1.04227	0.0390497	0.0125511	0.880697	0.0205986	0.00625419	1.29137	0.0056501	0.0017276	0.407679	0.300537	0.197188
68861	1190002N15Rik	4.91262	21.0409	5.92138	1.9309	-2.00254	5.66113e-06	2.40385e-07	-0.224942	0.506857	0.366	1.4778	0.000862853	0.000103545	1.77194	1.07922e-08	1.13178e-10	3.47811	7.78946e-11	3.72396e-14	1.70465	1.49298e-06	3.95687e-08
68918	1190005I06Rik	0.0945855	0	0.159212	0.0503619	0	1	1	0	1	1	0	1	1	0	1	1	0	1	1	0	1	1
544717	1190007I07Rik	1.21315	1.69491	0.694288	1.08164	-0.0429752	0.97763	0.963204	0.836614	0.355033	0.224512	-0.147774	0.884779	0.827088	0.84015	0.322317	0.201963	-0.119123	0.888416	0.85519	-0.963423	0.072959	0.0329578
330767	1190028D05Rik	0	0	0	0	0	1	1	0	1	1	0	1	1	0	1	1	0	1	1	0	1	1
100043489	1300002E11Rik	3.56559	2.0953	2.43565	8.83637	1.12752	0.0656776	0.0252775	0.677448	0.0500763	0.0170083	-1.09604	0.00771374	0.00156532	-0.446464	0.356058	0.231478	-2.23019	0.000470303	7.59641e-05	-1.77298	2.36463e-05	1.20371e-06
71775	1300017J02Rik	0	0	0.0067945	0	0	1	1	0	1	1	0	1	1	0	1	1	0	1	1	0	1	1
102636313	1500002C15Rik	3.62806	3.78305	3.07778	2.43475	0.0620401	0.94306	0.910231	0.190968	0.771324	0.67529	0.515405	0.427899	0.294684	0.125047	0.844214	0.767136	0.444287	0.310909	0.232959	0.327831	0.497637	0.381155
76683	1500002F19Rik	0.0431623	0.152915	0.109353	0.103565	0	1	1	0	1	1	0	1	1	0	1	1	0	1	1	0	1	1
319830	1500004A13Rik	4.03233	2.71221	3.97116	4.02014	0.55899	0.11136	0.0497269	0.0812002	0.78752	0.697272	0.058379	0.863912	0.798865	-0.473919	0.124761	0.0592443	-0.50403	0.103539	0.0617684	-0.0352388	0.903276	0.862778
76505	1500009C09Rik	5.46206	18.6113	6.4789	4.81117	-1.65709	0.000333962	3.69713e-05	-0.144717	0.706163	0.591421	0.327351	0.514279	0.379158	1.50722	6.60056e-07	2.02468e-08	1.98501	2.11981e-05	1.70891e-06	0.490581	0.129365	0.0673138
69784	1500009L16Rik	1.43525	1.42714	3.1136	2.86936	0.351829	0.657234	0.541032	-0.833278	0.119879	0.0532605	-0.694698	0.201478	0.107638	-1.18649	0.0308116	0.0103027	-1.04433	0.0263285	0.0117071	0.136838	0.720518	0.625886
66236	1500011B03Rik	11.8298	12.9519	19.5255	16.6956	-0.339073	0.299636	0.181781	-0.878584	0.00179912	0.000255074	-0.659679	0.044248	0.0147493	-0.54051	0.00606534	0.00138942	-0.319177	0.212163	0.146798	0.224031	0.300267	0.196848
67885	1500011K16Rik	14.254	12.9579	13.9365	14.2522	-0.0910288	0.83459	0.756809	0.00632814	0.984197	0.975728	0.0439728	0.912529	0.868566	0.0996563	0.734106	0.627423	0.138572	0.686638	0.61442	0.0388739	0.889014	0.841065
68954	1500012K07Rik	0.271021	0	0.120757	0	2.11164	0.0334949	0.0107247	1.54483	0.0457899	0.0151669	3.9461	0.000237635	2.15691e-05	0	1	1	0	1	1	0	1	1
68982	1500015A07Rik	1.04574	1.05472	0.803811	1.01926	0.408604	0.59693	0.469084	0.496999	0.266756	0.153229	0.287291	0.622182	0.495258	0.0754148	0.905968	0.854426	-0.120677	0.854464	0.811222	-0.212628	0.571249	0.456603
68994	1500015L24Rik	0	0	0	0	0	1	1	0	1	1	0	1	1	0	1	1	0	1	1	0	1	1
78896	1500015O10Rik	0.540457	2.44607	0.0616971	0.191685	-2.81987	0.00977617	0.00230202	0	1	1	0	1	1	0	1	1	0	1	1	0	1	1
70258	1500035N22Rik	1.08427	0.307783	0.221909	0.157652	1.68018	0.113664	0.0509594	2.28707	0.00513605	0.000944407	2.8858	0.00533257	0.000972493	0.62689	0.426322	0.294094	0	1	1	0.592844	0.389927	0.27637
320309	1520401A03Rik	0	0	0	0.0220456	0	1	1	0	1	1	0	1	1	0	1	1	0	1	1	0	1	1
69776	1600002D24Rik	0	0	0	0	0	1	1	0	1	1	0	1	1	0	1	1	0	1	1	0	1	1
69770	1600002K03Rik	0.249144	0.355052	0.529764	0.803877	0	1	1	0	1	1	0	1	1	0	1	1	0	1	1	-0.124643	0.869167	0.813515
69781	1600010M07Rik	0.0500991	0	0	0.0600092	0	1	1	0	1	1	0	1	1	0	1	1	0	1	1	0	1	1
67912	1600012H06Rik	2.50425	3.59383	3.73822	3.9179	-0.698471	0.0470015	0.0164815	-0.723489	0.0180568	0.00457905	-0.756924	0.0659245	0.0245772	-0.0207798	0.950418	0.920227	-0.063807	0.874951	0.838201	-0.0369208	0.919363	0.883213
72025	1600012P17Rik	0	0	0	0	0	1	1	0	1	1	0	1	1	0	1	1	0	1	1	0	1	1
72244	1600014C10Rik	3.81745	6.82047	3.90804	4.3446	-0.808009	0.00376384	0.000718935	-0.0678643	0.798001	0.711658	-0.178939	0.524853	0.390117	0.739085	0.000246858	2.81532e-05	0.632321	0.00303389	0.000800731	-0.111043	0.57061	0.455884
72240	1600014C23Rik	0	0	0	0	0	1	1	0	1	1	0	1	1	0	1	1	0	1	1	0	1	1
69761	1600015I10Rik	0	0	0	0	0	1	1	0	1	1	0	1	1	0	1	1	0	1	1	0	1	1
69768	1600019K03Rik	0	0	0	0	0	1	1	0	1	1	0	1	1	0	1	1	0	1	1	0	1	1
72012	1600020E01Rik	0.776622	0.178861	1.06979	1.4006	0	1	1	-0.554901	0.472902	0.332396	-0.848758	0.301761	0.18401	-0.864919	0.23641	0.13487	-1.14578	0.127407	0.0794792	-0.296622	0.577096	0.46267
73252	1600022D10Rik	0	0	0.0581382	0	0	1	1	0	1	1	0	1	1	0	1	1	0	1	1	0	1	1
69788	1600023N17Rik	0	0	0.179589	0.57363	0	1	1	0	1	1	0	1	1	0	1	1	0	1	1	0	1	1
72030	1600025M17Rik	0	0	0	0	0	1	1	0	1	1	0	1	1	0	1	1	0	1	1	0	1	1
69794	1600027J07Rik	0	0	0	0	0	1	1	0	1	1	0	1	1	0	1	1	0	1	1	0	1	1
69797	1600029I14Rik	0	0.615175	0	0	0	1	1	0	1	1	0	1	1	0	1	1	0	1	1	0	1	1
665268	1600029O15Rik	0.162055	0	0.0974362	0.136696	0	1	1	0	1	1	0	1	1	0	1	1	0	1	1	0	1	1
75434	1700001C02Rik	0	1.31042	0	0	0	1	1	0	1	1	0	1	1	0	1	1	0	1	1	0	1	1
75462	1700001C19Rik	0	0	0	0	0	1	1	0	1	1	0	1	1	0	1	1	0	1	1	0	1	1
69279	1700001D01Rik	0.407137	0.431167	0.241842	0.516733	0	1	1	0	1	1	0	1	1	0	1	1	0	1	1	0	1	1
71826	1700001F09Rik	0	0	0	0	0	1	1	0	1	1	0	1	1	0	1	1	0	1	1	0	1	1
75433	1700001G01Rik	0	0	0	0	0	1	1	0	1	1	0	1	1	0	1	1	0	1	1	0	1	1
69303	1700001G11Rik	0.190524	0	0.143602	0.144141	0	1	1	0	1	1	0	1	1	0	1	1	0	1	1	0	1	1
67503	1700001G17Rik	0	0	0.079084	0.061245	0	1	1	0	1	1	0	1	1	0	1	1	0	1	1	0	1	1
69282	1700001J03Rik	0	0	0	0	0	1	1	0	1	1	0	1	1	0	1	1	0	1	1	0	1	1
102633312	1700001J04Rik	0	0	0	0	0	1	1	0	1	1	0	1	1	0	1	1	0	1	1	0	1	1
72224	1700001J11Rik	0	0	0	0	0	1	1	0	1	1	0	1	1	0	1	1	0	1	1	0	1	1
66323	1700001K19Rik	0.608232	0.0696094	0.331071	0.682444	2.40006	0.0289167	0.00891201	1.02373	0.0949216	0.0393156	0.318994	0.696206	0.582122	-1.35378	0.0488467	0.0183708	-2.08023	0.0286842	0.0129708	-0.685408	0.205066	0.12066
69319	1700001K23Rik	0.204232	0	0.0801099	0	0	1	1	0	1	1	0	1	1	0	1	1	0	1	1	0	1	1
69291	1700001L05Rik	0.968787	0.040718	0.143531	0.228234	4.10144	0.00124947	0.000187244	2.83587	8.58515e-05	5.81486e-06	2.13961	0.00245505	0.000374782	-1.26404	0.0460084	0.0170831	-1.95842	0.0084767	0.00285586	-0.686061	0.120154	0.0613679
69315	1700001L19Rik	4.25607	0.631572	2.27057	0.751289	3.38305	0.000430856	5.05789e-05	0.929797	0.00549002	0.00102717	2.58072	0.000213546	1.90642e-05	-2.43866	0.000264657	3.05994e-05	-0.808432	0.296389	0.219934	1.64636	0.000912902	0.000125101
73598	1700001O22Rik	0	0.747481	0.177186	0.279549	0	1	1	-1.76667	0.0995437	0.0418278	0	1	1	1.90591	0.0062392	0.00144151	0.97989	0.11423	0.0695274	-0.894187	0.130006	0.067712
72215	1700001P01Rik	0.28124	0	0.0716478	0.0594287	0	1	1	0	1	1	0	1	1	0	1	1	0	1	1	0	1	1
69345	1700003C15Rik	0	0	0	0	0	1	1	0	1	1	0	1	1	0	1	1	0	1	1	0	1	1
69338	1700003D09Rik	0.519392	0.245121	3.55667	0.0691499	0.243095	0.853248	0.783022	-2.70231	0.0260286	0.00732738	2.10922	0.104319	0.0449626	-2.88526	0.0304474	0.0101404	0	1	1	4.80567	0.00765359	0.00186589
71837	1700003E16Rik	0.688787	0.408817	0.479199	0.198582	0.180844	0.813621	0.732064	0.62931	0.282927	0.165567	1.99145	0.0227414	0.00620376	0.470808	0.438457	0.305198	0	1	1	1.34242	0.0711166	0.0319494
100042663	1700003E24Rik	0	0	0	0	0	1	1	0	1	1	0	1	1	0	1	1	0	1	1	0	1	1
75480	1700003F12Rik	0.392244	0	0.0706813	0.598394	0	1	1	0	1	1	0	1	1	0	1	1	0	1	1	0	1	1
72229	1700003G13Rik	0	0	0	0	0	1	1	0	1	1	0	1	1	0	1	1	0	1	1	0	1	1
69350	1700003G18Rik	0	0	0.202405	0	0	1	1	0	1	1	0	1	1	0	1	1	0	1	1	0	1	1
384775	1700003H04Rik	0	0	0	0	0	1	1	0	1	1	0	1	1	0	1	1	0	1	1	0	1	1
69356	1700003I22Rik	0	0	0	0	0	1	1	0	1	1	0	1	1	0	1	1	0	1	1	0	1	1
75493	1700003L19Rik	0	0	0	0	0	1	1	0	1	1	0	1	1	0	1	1	0	1	1	0	1	1
72225	1700003M07Rik	2.48193	0.400542	0.725822	0.153622	2.61216	0.0252226	0.00748504	1.57619	0.0145914	0.00348523	3.52591	0.00612718	0.00116261	-1.00143	0.128597	0.0616475	0	1	1	1.91368	0.0271954	0.0094996
75632	1700003O11Rik	0	0	0	0	0	1	1	0	1	1	0	1	1	0	1	1	0	1	1	0	1	1
75890	1700003P14Rik	0	0	0	0	0	1	1	0	1	1	0	1	1	0	1	1	0	1	1	0	1	1
71824	1700006A11Rik	0	0	0	0	0	1	1	0	1	1	0	1	1	0	1	1	0	1	1	0	1	1
75437	1700006E09Rik	0	0	0	0	0	1	1	0	1	1	0	1	1	0	1	1	0	1	1	0	1	1
75432	1700006F04Rik	0	0	0.101841	2.62175	0	1	1	0	1	1	-3.40566	0.0124558	0.00287918	0	1	1	-2.70804	0.0116984	0.00427205	-3.93454	0.00152136	0.000239288
72241	1700006H20Rik	0.0140854	0.0559678	0.0178428	0.0338508	0	1	1	0	1	1	0	1	1	0	1	1	0	1	1	0	1	1
72257	1700006H21Rik	0	0	0	0	0	1	1	0	1	1	0	1	1	0	1	1	0	1	1	0	1	1
321010	1700006J14Rik	0	0	0	0	0	1	1	0	1	1	0	1	1	0	1	1	0	1	1	0	1	1
114672	1700007E05Rik	0	0	0	0	0	1	1	0	1	1	0	1	1	0	1	1	0	1	1	0	1	1
67850	1700007F19Rik	0.107404	0	0.0450978	0	0	1	1	0	1	1	0	1	1	0	1	1	0	1	1	0	1	1
75784	1700007G11Rik	0	0.901125	0.0290502	0.0722876	0	1	1	0	1	1	0	1	1	0	1	1	0	1	1	0	1	1
69320	1700007J10Rik	0.692189	0.208784	0.198873	0.774848	1.43977	0.169832	0.0857646	1.86654	0.0233907	0.00636178	-0.00695615	0.994924	0.990931	0	1	1	-1.45149	0.0797271	0.0450201	-1.85699	0.00949291	0.00247439
69318	1700007K09Rik	0.0443406	0	0.0341232	0.274295	0	1	1	0	1	1	0	1	1	0	1	1	0	1	1	0	1	1
69327	1700007K13Rik	0.141579	2.60033	0.226653	0	0	1	1	0	1	1	0	1	1	0	1	1	0	1	1	0	1	1
100502742	1700007L15Rik	0.40462	0.47929	0.43986	0.357899	0	1	1	0.441642	0.748547	0.644875	0	1	1	0	1	1	0	1	1	0	1	1
69308	1700007P06Rik	0.0461035	0	0	0	0	1	1	0	1	1	0	1	1	0	1	1	0	1	1	0	1	1
75494	1700008C04Rik	0	0	0	0	0	1	1	0	1	1	0	1	1	0	1	1	0	1	1	0	1	1
629159	1700008J07Rik	0.391108	0.420452	0.540238	0.623785	-0.356507	0.718063	0.612534	-0.51574	0.438153	0.299671	-0.852012	0.253368	0.14509	-0.159247	0.774836	0.679563	-0.504167	0.376785	0.294078	-0.337475	0.348899	0.238908
69311	1700008K24Rik	0.0977647	0	0.172777	0.523176	0	1	1	0	1	1	-2.10482	0.0613094	0.0224082	0	1	1	0	1	1	0	1	1
69349	1700008O03Rik	23.4174	27.9593	7.82974	16.3992	-0.14851	0.755154	0.658905	1.46964	7.03633e-05	4.53493e-06	0.369304	0.144887	0.0691043	1.62148	0.000420923	5.39914e-05	0.532853	0.156177	0.101597	-1.10915	0.000216024	1.94768e-05
69347	1700008P02Rik	0	0	0	0	0	1	1	0	1	1	0	1	1	0	1	1	0	1	1	0	1	1
74220	1700009C05Rik	0	0	0	0	0	1	1	0	1	1	0	1	1	0	1	1	0	1	1	0	1	1
75188	1700009J07Rik	0	0	0	0	0	1	1	0	1	1	0	1	1	0	1	1	0	1	1	0	1	1
75471	1700009N14Rik	0	0	0	0	0	1	1	0	1	1	0	1	1	0	1	1	0	1	1	0	1	1
75485	1700010B08Rik	0	0	0	0	0	1	1	0	1	1	0	1	1	0	1	1	0	1	1	0	1	1
76386	1700010D01Rik	0	0	0	0	0	1	1	0	1	1	0	1	1	0	1	1	0	1	1	0	1	1
75500	1700010H22Rik	0	0	0	0	0	1	1	0	1	1	0	1	1	0	1	1	0	1	1	0	1	1
75476	1700010I02Rik	0	0	0	0	0	1	1	0	1	1	0	1	1	0	1	1	0	1	1	0	1	1
66931	1700010I14Rik	0	0.175076	0.51282	0	0	1	1	-3.41207	0.00172748	0.000242245	0	1	1	-1.33755	0.0398713	0.0142425	0	1	1	4.12685	4.80425e-06	1.63397e-07
69355	1700010J16Rik	0	0	0	0	0	1	1	0	1	1	0	1	1	0	1	1	0	1	1	0	1	1
75501	1700010K23Rik	60.9643	40.1307	62.4302	50.5381	0.359212	0.389542	0.259471	-0.0976623	0.787264	0.696898	0.189647	0.641137	0.516694	-0.45758	0.105421	0.0477114	-0.170741	0.587371	0.506899	0.288574	0.315898	0.210051
619808	1700010L04Rik	0.0205193	0	0.0300693	0.0779383	0	1	1	0	1	1	0	1	1	0	1	1	0	1	1	0	1	1
100503727	1700011B04Rik	0	0	0	0	0	1	1	0	1	1	0	1	1	0	1	1	0	1	1	0	1	1
75451	1700011C11Rik	0	0	0	0	0	1	1	0	1	1	0	1	1	0	1	1	0	1	1	0	1	1
67082	1700011H14Rik	0	0	0.065094	0.171833	0	1	1	0	1	1	0	1	1	0	1	1	0	1	1	0	1	1
75444	1700011I03Rik	0	0	0	0	0	1	1	0	1	1	0	1	1	0	1	1	0	1	1	0	1	1
67687	1700011L22Rik	0	0	0	0	0	1	1	0	1	1	0	1	1	0	1	1	0	1	1	0	1	1
75443	1700011M02Rik	0	0	0	0	0	1	1	0	1	1	0	1	1	0	1	1	0	1	1	0	1	1
76382	1700012A03Rik	0	0	0	0	0	1	1	0	1	1	0	1	1	0	1	1	0	1	1	0	1	1
69324	1700012B07Rik	0	0	0	0	0	1	1	0	1	1	0	1	1	0	1	1	0	1	1	0	1	1
69325	1700012B09Rik	0	4.60569	0.0236673	0	-6.06732	0.000171644	1.63515e-05	0	1	1	0	1	1	5.87389	1.81883e-05	1.1969e-06	5.37977	0.000258885	3.591e-05	0	1	1
72243	1700012D01Rik	0.477297	0.353423	0.179989	0.653447	0	1	1	0	1	1	0	1	1	0	1	1	0	1	1	0	1	1
75479	1700012D14Rik	0.277038	0	0.380441	1.19362	0	1	1	0	1	1	-2.09397	0.0531695	0.0187357	0	1	1	-1.71737	0.0115896	0.00422282	-1.70648	0.00845245	0.00212471
75489	1700012D16Rik	0.273136	0	0.0370946	0.150256	2.5681	0.15095	0.0734615	3.31028	0.0147226	0.00352751	1.83621	0.2119	0.114711	0	1	1	-0.73061	0.588324	0.508043	-1.47015	0.218151	0.130629
76393	1700012H19Rik	0	0	0	0	0	1	1	0	1	1	0	1	1	0	1	1	0	1	1	0	1	1
69334	1700012I11Rik	0	0	0	0	0	1	1	0	1	1	0	1	1	0	1	1	0	1	1	0	1	1
69364	1700012P22Rik	0	0	0	0	0	1	1	0	1	1	0	1	1	0	1	1	0	1	1	0	1	1
76921	1700013D24Rik	0	0	0	0	0	1	1	0	1	1	0	1	1	0	1	1	0	1	1	0	1	1
75504	1700013F07Rik	0.126728	0.927477	0.260474	0.562973	0	1	1	0	1	1	0	1	1	0	1	1	0	1	1	0	1	1
69380	1700013G24Rik	0	0	0	0	0	1	1	0	1	1	0	1	1	0	1	1	0	1	1	0	1	1
75514	1700013H16Rik	0	0	0	0	0	1	1	0	1	1	0	1	1	0	1	1	0	1	1	0	1	1
75634	1700013N06Rik	0	0	0	0	0	1	1	0	1	1	0	1	1	0	1	1	0	1	1	0	1	1
102638268	1700014D04Rik	0.0995596	0.0307809	0.112605	0.0257355	0	1	1	-0.442879	0.684078	0.561383	0	1	1	-0.677723	0.320849	0.20077	0	1	1	1.56833	0.0528787	0.0220303
75532	1700015C15Rik	0	0	0	0	0	1	1	0	1	1	0	1	1	0	1	1	0	1	1	0	1	1
381716	1700015F17Rik	0	0	0	0.0560976	0	1	1	0	1	1	0	1	1	0	1	1	0	1	1	0	1	1
100503036	1700015G11Rik	0	0	0	0	0	1	1	0	1	1	0	1	1	0	1	1	0	1	1	0	1	1
102638388	1700015I17Rik	0	0	0	0	0	1	1	0	1	1	0	1	1	0	1	1	0	1	1	0	1	1
74227	1700016A09Rik	0.325837	0	0	0.137408	0	1	1	0	1	1	0	1	1	0	1	1	0	1	1	0	1	1
69428	1700016C15Rik	0	0.2187	0.0138482	0.118525	0	1	1	0	1	1	0	1	1	0	1	1	0	1	1	0	1	1
76413	1700016D06Rik	0	0	0	0	0	1	1	0	1	1	0	1	1	0	1	1	0	1	1	0	1	1
666145	1700016G14Rik	0	0	0	0	0	1	1	0	1	1	0	1	1	0	1	1	0	1	1	0	1	1
71867	1700016G22Rik	0	0	0	0	0	1	1	0	1	1	0	1	1	0	1	1	0	1	1	0	1	1
74218	1700016H13Rik	0	0	0	0	0	1	1	0	1	1	0	1	1	0	1	1	0	1	1	0	1	1
75561	1700016J18Rik	0.0296297	0.0497973	0.144825	0.194006	0	1	1	0	1	1	0	1	1	0	1	1	0	1	1	0	1	1
102639882	1700016K05Rik	0	0.982614	0.338199	0	0	1	1	-1.56791	0.210145	0.111285	0	1	1	0	1	1	0	1	1	0	1	1
74230	1700016K19Rik	0.775287	8.18293	0.362793	0	-3.29347	0.00241679	0.000419653	0.941717	0.374845	0.240892	3.497	0.00649339	0.00125503	4.2621	1.23097e-05	7.3582e-07	6.80874	4.04447e-06	2.14073e-07	0	1	1
69412	1700016L04Rik	0	0	0.0899222	0.109602	0	1	1	0	1	1	0	1	1	0	1	1	0	1	1	0	1	1
72208	1700016L21Rik	0	0	0	0	0	1	1	0	1	1	0	1	1	0	1	1	0	1	1	0	1	1
69413	1700016P04Rik	0	0	0	0	0	1	1	0	1	1	0	1	1	0	1	1	0	1	1	0	1	1
74211	1700017B05Rik	1.11342	0.447445	0.732805	1.381	1.21384	0.0915155	0.0384689	0.703237	0.110521	0.047939	-0.305067	0.55452	0.420663	-0.514154	0.128314	0.0614782	-1.51812	0.00220254	0.000534164	-1.00347	0.00207216	0.000356122
69369	1700017D01Rik	0	0	0	0	0	1	1	0	1	1	0	1	1	0	1	1	0	1	1	0	1	1
100040882	1700017G19Rik	0	0	0	0	0	1	1	0	1	1	0	1	1	0	1	1	0	1	1	0	1	1
75508	1700017J07Rik	0	0	0	0	0	1	1	0	1	1	0	1	1	0	1	1	0	1	1	0	1	1
69370	1700017L05Rik	0	0	0	0	0	1	1	0	1	1	0	1	1	0	1	1	0	1	1	0	1	1
66605	1700017N19Rik	0	0	0	0	0	1	1	0	1	1	0	1	1	0	1	1	0	1	1	0	1	1
71307	1700018A04Rik	0	0	0	0	0	1	1	0	1	1	0	1	1	0	1	1	0	1	1	0	1	1
72231	1700018A23Rik	7.22685	15.216	7.91529	4.7531	-1.15108	0.00137028	0.000208938	-0.139654	0.690698	0.570797	0.442294	0.212229	0.114947	1.01268	0.00021449	2.38442e-05	1.59367	3.30953e-06	1.6794e-07	0.575973	0.0313347	0.0114073
76405	1700018B08Rik	0	0	0	0	0	1	1	0	1	1	0	1	1	0	1	1	0	1	1	0	1	1
66332	1700018B24Rik	0	0	0	0	0	1	1	0	1	1	0	1	1	0	1	1	0	1	1	0	1	1
69396	1700018F24Rik	0	0	0	0	0	1	1	0	1	1	0	1	1	0	1	1	0	1	1	0	1	1
69388	1700018G05Rik	0.435287	0.305275	0.392302	0.35697	0	1	1	0	1	1	0	1	1	0	1	1	0	1	1	0	1	1
67329	1700018L02Rik	0.28823	0.596551	0.354191	0.358522	0	1	1	-0.405492	0.642755	0.51227	0	1	1	0.710718	0.293219	0.178495	0	1	1	0.158898	0.83373	0.765531
69397	1700019A02Rik	0.648161	0.30768	0.6136	0.704565	0.670486	0.596544	0.468517	-0.053664	0.953851	0.927065	-0.242796	0.791462	0.702025	-0.718418	0.262981	0.155217	-0.907983	0.122596	0.0758332	-0.192131	0.63126	0.521887
75543	1700019C18Rik	0	0	0	0	0	1	1	0	1	1	0	1	1	0	1	1	0	1	1	0	1	1
67080	1700019D03Rik	0.48234	0.998912	0.771975	1.11176	-0.873082	0.0668738	0.0258884	-0.488174	0.235898	0.129954	-0.876066	0.0532956	0.0188353	0.385828	0.222537	0.124705	-0.00288856	0.993983	0.991403	-0.387875	0.161595	0.0893483
69405	1700019E08Rik	0	0	0	0	0	1	1	0	1	1	0	1	1	0	1	1	0	1	1	0	1	1
72249	1700019G24Rik	0	0.331353	0.0492202	0.177729	0	1	1	0	1	1	0	1	1	0	1	1	0	1	1	0	1	1
76412	1700019J19Rik	0	0	0	0	0	1	1	0	1	1	0	1	1	0	1	1	0	1	1	0	1	1
75549	1700019L22Rik	0.0511134	0.0544269	0.43819	2.01403	0.221306	0.886737	0.82873	-3.0129	0.000673591	7.49825e-05	-5.3205	0.00125382	0.000161926	-3.29325	3.16341e-05	2.40671e-06	-5.56003	0.00514157	0.00153664	-2.27874	0.00142305	0.000220036
69423	1700019M22Rik	0	0	0	0	0	1	1	0	1	1	0	1	1	0	1	1	0	1	1	0	1	1
67507	1700019N19Rik	0	0	0	0	0	1	1	0	1	1	0	1	1	0	1	1	0	1	1	0	1	1
75546	1700019P21Rik	0	0	0	0	0	1	1	0	1	1	0	1	1	0	1	1	0	1	1	0	1	1
75656	1700020A23Rik	0	0	0	0	0	1	1	0	1	1	0	1	1	0	1	1	0	1	1	0	1	1
75555	1700020D05Rik	0.0758752	0	0.0649263	0.170097	0	1	1	0	1	1	0	1	1	0	1	1	0	1	1	0	1	1
69437	1700020D12Rik	0	0	0	0	0	1	1	0	1	1	0	1	1	0	1	1	0	1	1	0	1	1
69438	1700020D14Rik	0	0	0	0	0	1	1	0	1	1	0	1	1	0	1	1	0	1	1	0	1	1
75630	1700020G17Rik	0	0	0	0	0	1	1	0	1	1	0	1	1	0	1	1	0	1	1	0	1	1
66602	1700020I14Rik	55.4468	98.5514	40.0085	39.6327	-0.95196	0.00308472	0.000563317	0.346858	0.224826	0.122268	0.298849	0.308442	0.189601	1.30228	4.38963e-07	1.17387e-08	1.25493	1.53259e-06	6.45819e-08	-0.0530752	0.777849	0.697069
66330	1700020L24Rik	0.0288152	0.12726	0.0325663	0.120088	0	1	1	0	1	1	0	1	1	0	1	1	0	1	1	0	1	1
76402	1700020M21Rik	0	0	0	0	0	1	1	0	1	1	0	1	1	0	1	1	0	1	1	0	1	1
67692	1700020N01Rik	0	0	0	0	0	1	1	0	1	1	0	1	1	0	1	1	0	1	1	0	1	1
75509	1700020N15Rik	0	0	0	0	0	1	1	0	1	1	0	1	1	0	1	1	0	1	1	0	1	1
67086	1700020N18Rik	0	0	0	0	0	1	1	0	1	1	0	1	1	0	1	1	0	1	1	0	1	1
75519	1700021F02Rik	0	0	0	0	0	1	1	0	1	1	0	1	1	0	1	1	0	1	1	0	1	1
67851	1700021F05Rik	4.10689	12.401	5.32096	5.43993	-1.70002	0.000401337	4.62006e-05	-0.400609	0.299583	0.178684	-0.445364	0.263655	0.153225	1.29654	9.09628e-05	8.57937e-06	1.25914	0.000240027	3.25402e-05	-0.0315727	0.915998	0.878278
72221	1700021F07Rik	0	0	0	0	0	1	1	0	1	1	0	1	1	0	1	1	0	1	1	0	1	1
73256	1700021G15Rik	0	0	0	0	0	1	1	0	1	1	0	1	1	0	1	1	0	1	1	0	1	1
76410	1700021L23Rik	0	0	0	0	0	1	1	0	1	1	0	1	1	0	1	1	0	1	1	0	1	1
69409	1700021N21Rik	0	0	0	0	0	1	1	0	1	1	0	1	1	0	1	1	0	1	1	0	1	1
72252	1700022A21Rik	0	0	0	0	0	1	1	0	1	1	0	1	1	0	1	1	0	1	1	0	1	1
71120	1700022A22Rik	0	0	0	0	0	1	1	0	1	1	0	1	1	0	1	1	0	1	1	0	1	1
75636	1700022E09Rik	0	0	0	0	0	1	1	0	1	1	0	1	1	0	1	1	0	1	1	0	1	1
75539	1700022H01Rik	3.07415	10.2842	6.60008	3.95572	-1.80415	0.000239298	2.46275e-05	-1.06182	0.0086891	0.00181776	-0.21317	0.657303	0.534613	0.744557	0.0076789	0.00185669	1.59223	6.6716e-05	6.93497e-06	0.845986	0.00788926	0.00194435
69420	1700022H16Rik	0	0	0	0	0	1	1	0	1	1	0	1	1	0	1	1	0	1	1	0	1	1
67317	1700022I11Rik	0.0471153	0	0	0.0772394	0	1	1	0	1	1	0	1	1	0	1	1	0	1	1	0	1	1
69431	1700022N22Rik	0.252661	0.234603	0.253262	0.130792	0	1	1	0	1	1	0	1	1	0	1	1	0	1	1	0	1	1
73257	1700023C21Rik	0	0	0	0	0	1	1	0	1	1	0	1	1	0	1	1	0	1	1	0	1	1
102640359	1700023D09Rik	2.23629	2.28051	2.04609	2.7306	-0.205908	0.803077	0.718877	-0.248114	0.681393	0.557872	-0.654464	0.26163	0.151683	-0.0507053	0.923091	0.87947	-0.453025	0.243462	0.173323	-0.40343	0.183828	0.105261
69433	1700023F02Rik	0	0	0	0	0	1	1	0	1	1	0	1	1	0	1	1	0	1	1	0	1	1
69441	1700023F06Rik	0.0418977	0.283964	0.226471	0.160019	0	1	1	0	1	1	0	1	1	0	1	1	0	1	1	0	1	1
73281	1700023G09Rik	0	0	0	0	0	1	1	0	1	1	0	1	1	0	1	1	0	1	1	0	1	1
100503856	1700024B05Rik	0	0	0	0	0	1	1	0	1	1	0	1	1	0	1	1	0	1	1	0	1	1
69393	1700024B18Rik	0.97854	0.40342	0.766298	1.9022	0	1	1	0.264918	0.836624	0.761541	-1.05467	0.421828	0.289252	0	1	1	-1.35654	0.173188	0.115124	-1.32324	0.10689	0.0529123
73270	1700024F13Rik	0	0	0.0695903	0.634051	0	1	1	0	1	1	0	1	1	0	1	1	0	1	1	0	1	1
67085	1700024G13Rik	0	1.56099	0	0	0	1	1	0	1	1	0	1	1	0	1	1	0	1	1	0	1	1
75522	1700024I08Rik	0	0	0	0	0	1	1	0	1	1	0	1	1	0	1	1	0	1	1	0	1	1
75520	1700024N05Rik	0	0	0	0	0	1	1	0	1	1	0	1	1	0	1	1	0	1	1	0	1	1
69382	1700024P04Rik	0	0	0	0	0	1	1	0	1	1	0	1	1	0	1	1	0	1	1	0	1	1
76409	1700025B11Rik	0	0	0	0	0	1	1	0	1	1	0	1	1	0	1	1	0	1	1	0	1	1
72211	1700025C18Rik	0	0	0	0	0	1	1	0	1	1	0	1	1	0	1	1	0	1	1	0	1	1
100041739	1700025D23Rik	0	0	0	0	0	1	1	0	1	1	0	1	1	0	1	1	0	1	1	0	1	1
69416	1700025F22Rik	0	0	0	0	0	1	1	0	1	1	0	1	1	0	1	1	0	1	1	0	1	1
67081	1700025F24Rik	0	0.775633	0.649892	0.210909	0	1	1	-2.76227	0.0104837	0.002299	0	1	1	0.568651	0.431699	0.299221	0	1	1	1.54436	0.0811939	0.0377537
69399	1700025G04Rik	10.0628	6.49964	8.74977	9.79927	0.667032	0.00263204	0.000465193	0.208317	0.228067	0.124428	0.0427662	0.847259	0.774971	-0.458364	0.00143971	0.000239872	-0.621642	0.000647823	0.000112646	-0.167362	0.222695	0.134149
69407	1700025J12Rik	0	0	0	0	0	1	1	0	1	1	0	1	1	0	1	1	0	1	1	0	1	1
66334	1700025K04Rik	0	0	0	0	0	1	1	0	1	1	0	1	1	0	1	1	0	1	1	0	1	1
69418	1700025K24Rik	0	0	0	0	0	1	1	0	1	1	0	1	1	0	1	1	0	1	1	0	1	1
72276	1700025M24Rik	0	0	0	0	0	1	1	0	1	1	0	1	1	0	1	1	0	1	1	0	1	1
69986	1700025N23Rik	0	0	0	0	0	1	1	0	1	1	0	1	1	0	1	1	0	1	1	0	1	1
70371	1700026D11Rik	0	0	0	0	0	1	1	0	1	1	0	1	1	0	1	1	0	1	1	0	1	1
69419	1700026F02Rik	0	0	0	0	0	1	1	0	1	1	0	1	1	0	1	1	0	1	1	0	1	1
73255	1700026J12Rik	0	0	0	0	0	1	1	0	1	1	0	1	1	0	1	1	0	1	1	0	1	1
69432	1700026J14Rik	0	0	0	0.124045	0	1	1	0	1	1	0	1	1	0	1	1	0	1	1	0	1	1
72271	1700026N04Rik	0	0	0	0.0574001	0	1	1	0	1	1	0	1	1	0	1	1	0	1	1	0	1	1
69449	1700027A15Rik	0	0	0	0	0	1	1	0	1	1	0	1	1	0	1	1	0	1	1	0	1	1
72268	1700027F06Rik	0	0	0	0	0	1	1	0	1	1	0	1	1	0	1	1	0	1	1	0	1	1
69999	1700027F09Rik	0	0	0	0	0	1	1	0	1	1	0	1	1	0	1	1	0	1	1	0	1	1
72274	1700027H10Rik	6.31397	16.8604	19.0374	23.9161	-1.68841	0.000960688	0.000136087	-1.72198	0.000508959	5.31421e-05	-2.0974	3.88577e-05	2.34254e-06	-0.0311201	0.930342	0.890797	-0.415921	0.0702765	0.0386372	-0.364454	0.0988197	0.04803
75567	1700027I24Rik	0	0	0	0	0	1	1	0	1	1	0	1	1	0	1	1	0	1	1	0	1	1
69443	1700027J07Rik	0	0	0	0	0	1	1	0	1	1	0	1	1	0	1	1	0	1	1	0	1	1
70001	1700028B04Rik	0	0	0	0	0	1	1	0	1	1	0	1	1	0	1	1	0	1	1	0	1	1
75569	1700028D13Rik	0	0	0	0	0	1	1	0	1	1	0	1	1	0	1	1	0	1	1	0	1	1
625175	1700028E10Rik	0.0593773	0.0850399	0.05309	0.146946	0	1	1	0	1	1	0	1	1	0	1	1	0	1	1	0	1	1
70002	1700028E11Rik	0	0	0	0.095058	0	1	1	0	1	1	0	1	1	0	1	1	0	1	1	0	1	1
70003	1700028I16Rik	0	0	0	0	0	1	1	0	1	1	0	1	1	0	1	1	0	1	1	0	1	1
70004	1700028J19Rik	0.0315754	0	0.129196	0.079357	0	1	1	0	1	1	0	1	1	0.616204	0.50062	0.367336	0	1	1	0	1	1
76421	1700028K03Rik	0.951107	0.863983	0.844649	2.35042	0.332192	0.63055	0.509282	0.162633	0.734054	0.6258	-1.11996	0.0444382	0.0148267	-0.161128	0.71777	0.608578	-1.45352	0.0180426	0.00732695	-1.27996	0.00279809	0.000518762
69460	1700028M03Rik	0	0	0	0	0	1	1	0	1	1	0	1	1	0	1	1	0	1	1	0	1	1
67483	1700028P14Rik	0.245398	1.58691	0.126692	0.0627267	0	1	1	0	1	1	0	1	1	0	1	1	0	1	1	0	1	1
75655	1700028P15Rik	0	0	0	0	0	1	1	0	1	1	0	1	1	0	1	1	0	1	1	0	1	1
69495	1700029B22Rik	0	0	0	0	0	1	1	0	1	1	0	1	1	0	1	1	0	1	1	0	1	1
66479	1700029F12Rik	0	0	0	0	0	1	1	0	1	1	0	1	1	0	1	1	0	1	1	0	1	1
66501	1700029H14Rik	0	0	0	0	0	1	1	0	1	1	0	1	1	0	1	1	0	1	1	0	1	1
75641	1700029I15Rik	0.635809	0.674805	0.518727	1.25728	0	1	1	0	1	1	0	1	1	0	1	1	0	1	1	0	1	1
72264	1700029J03Rik	0	0	0	0	0	1	1	0	1	1	0	1	1	0	1	1	0	1	1	0	1	1
69479	1700029J07Rik	0.158029	0.284386	0.0984007	0.437578	0	1	1	0.911819	0.246428	0.137449	-0.932615	0.263775	0.153373	0	1	1	-0.211903	0.765991	0.703894	-1.83421	0.006074	0.00139052
69476	1700029M03Rik	0	0	0	0	0	1	1	0	1	1	0	1	1	0	1	1	0	1	1	0	1	1
73937	1700029M20Rik	0	0	0	0	0	1	1	0	1	1	0	1	1	0	1	1	0	1	1	0	1	1
69491	1700029N11Rik	0	0	0	0	0	1	1	0	1	1	0	1	1	0	1	1	0	1	1	0	1	1
66346	1700029P11Rik	0	0	0	0	0	1	1	0	1	1	0	1	1	0	1	1	0	1	1	0	1	1
74179	1700030A11Rik	0	0	0.0218016	0	0	1	1	0	1	1	0	1	1	0	1	1	0	1	1	0	1	1
69513	1700030C10Rik	0	0	0.0227379	0.182844	0	1	1	0	1	1	0	1	1	0	1	1	0	1	1	0	1	1
72246	1700030C12Rik	0	0.297635	0.366969	0.228825	0	1	1	0	1	1	0	1	1	0	1	1	0	1	1	0	1	1
75662	1700030C14Rik	0.237341	0	0.139475	0	0	1	1	0	1	1	0	1	1	0	1	1	0	1	1	0	1	1
72263	1700030F04Rik	0	0	0	0	0	1	1	0	1	1	0	1	1	0	1	1	0	1	1	0	1	1
72277	1700030F18Rik	0	0	0	0	0	1	1	0	1	1	0	1	1	0	1	1	0	1	1	0	1	1
69528	1700030J22Rik	0.960112	1.70671	1.55868	0.644064	-1.13184	0.201428	0.1069	-1.0753	0.123863	0.0556204	-0.0637921	0.95205	0.924554	0.0789509	0.827206	0.745283	1.07438	0.0161355	0.00634989	0.998475	0.00625163	0.00144203
72254	1700030K09Rik	0.68059	0.754991	0.749169	0.928685	0.0902899	0.915827	0.869378	0.126262	0.816271	0.735917	-0.130567	0.841021	0.766719	0.0207537	0.974006	0.95709	-0.222798	0.697514	0.626248	-0.25471	0.515539	0.399591
70055	1700030L20Rik	0	0	0	0	0	1	1	0	1	1	0	1	1	0	1	1	0	1	1	0	1	1
75576	1700030L22Rik	0.10291	0.212246	0.385331	6.41881	0	1	1	-1.89452	0.0432611	0.0140668	-6.03873	0.00375907	0.000630779	-0.769521	0.273907	0.163475	-4.91966	0.0122502	0.00453739	-4.14391	0.000426609	4.63355e-05
72259	1700030M09Rik	0	0	0	0	0	1	1	0	1	1	0	1	1	0	1	1	0	1	1	0	1	1
70011	1700030N03Rik	0	0	0	0	0	1	1	0	1	1	0	1	1	0	1	1	0	1	1	0	1	1
72286	1700030O20Rik	0	0	0	0	0	1	1	0	1	1	0	1	1	0	1	1	0	1	1	0	1	1
73286	1700031A10Rik	0	0	0	0	0	1	1	0	1	1	0	1	1	0	1	1	0	1	1	0	1	1
73300	1700031F05Rik	0	0	0	0	0	1	1	0	1	1	0	1	1	0	1	1	0	1	1	0	1	1
67327	1700031L13Rik	0	0	0	0	0	1	1	0	1	1	0	1	1	0	1	1	0	1	1	0	1	1
73302	1700031M16Rik	0	0	0	0	0	1	1	0	1	1	0	1	1	0	1	1	0	1	1	0	1	1
73278	1700031P21Rik	0	0	0	0	0	1	1	0	1	1	0	1	1	0	1	1	0	1	1	0	1	1
78414	1700034E13Rik	0	0	0	0	0	1	1	0	1	1	0	1	1	0	1	1	0	1	1	0	1	1
67325	1700034G24Rik	0.360803	0	0.0179092	0	0	1	1	0	1	1	0	1	1	0	1	1	0	1	1	0	1	1
98736	1700034H15Rik	0.259473	0.17751	0.25342	0.358711	0.758323	0.337955	0.213709	0.193964	0.730948	0.621948	-0.387998	0.510741	0.37531	-0.591231	0.329239	0.208243	-1.15376	0.0691926	0.0379468	-0.572033	0.158345	0.0871198
73297	1700034I23Rik	0.081577	0.0945564	0.217494	1.0734	0	1	1	-1.08664	0.155373	0.0748394	-3.35051	0.000178544	1.53684e-05	-0.45478	0.557818	0.427257	-2.70904	0.000882359	0.000168252	-2.2501	2.54006e-05	1.32437e-06
73344	1700034J05Rik	0.0499472	0.0269034	0.00849488	0	0	1	1	0	1	1	0	1	1	0	1	1	0	1	1	0	1	1
78349	1700034K08Rik	0	0	0	0	0	1	1	0	1	1	0	1	1	0	1	1	0	1	1	0	1	1
73331	1700034P13Rik	2.55665	3.434	2.75902	2.37391	-0.502149	0.354962	0.22873	-0.217619	0.632045	0.500526	0.199982	0.741916	0.639738	0.290055	0.387275	0.259119	0.699227	0.112586	0.0682806	0.413619	0.258075	0.162109
100040447	1700036A12Rik	0	0	0	0	0	1	1	0	1	1	0	1	1	0	1	1	0	1	1	0	1	1
73283	1700036G14Rik	0	0	0	0	0	1	1	0	1	1	0	1	1	0	1	1	0	1	1	0	1	1
73261	1700037C18Rik	1.28231	1.28696	1.18608	1.09855	-0.166325	0.81118	0.728927	0.159237	0.746243	0.641505	0.282619	0.606766	0.47823	0.31711	0.426487	0.294267	0.444362	0.253536	0.182022	0.127063	0.646076	0.539777
67326	1700037H04Rik	3.39561	8.55481	12.387	4.71472	-1.3819	0.00441969	0.000877418	-1.71858	0.000585546	6.27379e-05	-0.425667	0.372739	0.244802	-0.339125	0.288567	0.174914	0.953002	0.00498869	0.00148005	1.30271	0.00074927	9.56591e-05
73322	1700039E22Rik	0	0	0	0.172593	0	1	1	0	1	1	0	1	1	0	1	1	0	1	1	0	1	1
73346	1700039I01Rik	0	0	0.00677222	0	0	1	1	0	1	1	0	1	1	0	1	1	0	1	1	0	1	1
67518	1700039M10Rik	0.233717	0	0.164937	0.308368	0	1	1	0	1	1	0	1	1	0	1	1	0	1	1	0	1	1
76602	1700040D17Rik	0.248953	0.104601	0.366858	2.77365	0	1	1	-0.262086	0.77914	0.685366	-3.34551	0.000272464	2.54042e-05	-0.443101	0.586658	0.458152	-3.50207	0.000206417	2.71979e-05	-3.04898	3.75763e-05	2.17095e-06
73329	1700040F15Rik	0	0	0	0	0	1	1	0	1	1	0	1	1	0	1	1	0	1	1	0	1	1
102635658	1700040P09Rik	0	0	0	0	0	1	1	0	1	1	0	1	1	0	1	1	0	1	1	0	1	1
73312	1700041A01Rik	0	0	0	0	0	1	1	0	1	1	0	1	1	0	1	1	0	1	1	0	1	1
78623	1700041B01Rik	3.16179	1.16148	2.57025	2.42831	1.24144	0.0367091	0.0121006	0.435951	0.241281	0.133652	0.471614	0.316821	0.19683	-0.813103	0.0751365	0.0312818	-0.770696	0.152989	0.0990323	0.0348896	0.933642	0.903636
67319	1700041C23Rik	0	0	0	0	0	1	1	0	1	1	0	1	1	0	1	1	0	1	1	0	1	1
102638199	1700041I07Rik	0	0	0	0	0	1	1	0	1	1	0	1	1	0	1	1	0	1	1	0	1	1
76601	1700041M19Rik	0	0	0	0	0	1	1	0	1	1	0	1	1	0	1	1	0	1	1	0	1	1
67323	1700042G07Rik	0	0	0	0	0	1	1	0	1	1	0	1	1	0	1	1	0	1	1	0	1	1
73349	1700042G15Rik	0	0	0	0	0	1	1	0	1	1	0	1	1	0	1	1	0	1	1	0	1	1
73321	1700042O10Rik	0	0	0.018357	0	0	1	1	0	1	1	0	1	1	0	1	1	0	1	1	0	1	1
73306	1700044C05Rik	0	0	0	0	0	1	1	0	1	1	0	1	1	0	1	1	0	1	1	0	1	1
67321	1700044K03Rik	0	0	0	0	0	1	1	0	1	1	0	1	1	0	1	1	0	1	1	0	1	1
73348	1700045H11Rik	0	0	0	0	0	1	1	0	1	1	0	1	1	0	1	1	0	1	1	0	1	1
73307	1700046C09Rik	0	0	0	0	0	1	1	0	1	1	0	1	1	0	1	1	0	1	1	0	1	1
76604	1700047A11Rik	2.60104	1.91572	2.84486	3.5186	0.699107	0.261542	0.151693	-0.0242873	0.956047	0.930564	-0.285446	0.49117	0.356252	-0.733329	0.105535	0.047777	-0.98272	0.0356879	0.0168812	-0.266717	0.300478	0.197075
74328	1700047E10Rik	0	0	0	0	0	1	1	0	1	1	0	1	1	0	1	1	0	1	1	0	1	1
102633724	1700047F07Rik	0	0	0	0	0	1	1	0	1	1	0	1	1	0	1	1	0	1	1	0	1	1
73339	1700047G03Rik	0	0	0	0	0	1	1	0	1	1	0	1	1	0	1	1	0	1	1	0	1	1
100101807	1700047I17Rik2	0	0	0	0.0101917	0	1	1	0	1	1	0	1	1	0	1	1	0	1	1	0	1	1
73335	1700047K16Rik	0.294834	0.152285	0.700134	1.34949	0	1	1	0.322135	0.836561	0.761254	-1.73733	0.031692	0.00956307	0.109549	0.950656	0.921058	-1.96282	0.00647094	0.00204443	-2.13901	0.0469319	0.0189712
73295	1700047L14Rik	0	0	0	0	0	1	1	0	1	1	0	1	1	0	1	1	0	1	1	0	1	1
67330	1700047M11Rik	0	0	0	0	0	1	1	0	1	1	0	1	1	0	1	1	0	1	1	0	1	1
73465	1700048B10Rik	0	0	0	0	0	1	1	0	1	1	0	1	1	0	1	1	0	1	1	0	1	1
73396	1700048F04Rik	0	0	0.0958931	0.16146	0	1	1	0	1	1	0	1	1	0	1	1	0	1	1	0	1	1
100503166	1700048M11Rik	0	0	0.212811	0.164925	0	1	1	0	1	1	0	1	1	0	1	1	0	1	1	0	1	1
73433	1700048O14Rik	0	0	0	0	0	1	1	0	1	1	0	1	1	0	1	1	0	1	1	0	1	1
69430	1700048O20Rik	0.215364	1.18996	1.95881	3.92477	-1.74159	0.0231039	0.00671441	-2.5691	0.000353904	3.38085e-05	-3.56714	3.71642e-05	2.21506e-06	-0.810598	0.0789722	0.0332959	-1.81464	0.00119946	0.000249117	-0.999914	0.00308172	0.000586039
100039727	1700049E15Rik	0	0	0	0	0	1	1	0	1	1	0	1	1	0	1	1	0	1	1	0	1	1
666214	1700049E17Rik1	0	0	0	0	0	1	1	0	1	1	0	1	1	0	1	1	0	1	1	0	1	1
100041722	1700049E17Rik2	0	0	0	0	0	1	1	0	1	1	0	1	1	0	1	1	0	1	1	0	1	1
73395	1700049E22Rik	0	0	0	0	0	1	1	0	1	1	0	1	1	0	1	1	0	1	1	0	1	1
108950	1700049L16Rik	0	0	0	0	0	1	1	0	1	1	0	1	1	0	1	1	0	1	1	0	1	1
73366	1700051A21Rik	0	0	0	0	0	1	1	0	1	1	0	1	1	0	1	1	0	1	1	0	1	1
73462	1700052H01Rik	0	0	0	0	0	1	1	0	1	1	0	1	1	0	1	1	0	1	1	0	1	1
67340	1700052I22Rik	0	0	0	0	0	1	1	0	1	1	0	1	1	0	1	1	0	1	1	0	1	1
73431	1700052K11Rik	0.683083	0.855343	1.23436	0.890745	0.0358583	0.973908	0.955658	-0.554126	0.318944	0.194621	-0.195942	0.785415	0.694234	-0.584839	0.215427	0.119355	-0.231618	0.656243	0.582067	0.356676	0.254872	0.159593
78457	1700054A03Rik	0	0	0	0	0	1	1	0	1	1	0	1	1	0	1	1	0	1	1	0	1	1
67336	1700054K19Rik	0	0	0	0	0	1	1	0	1	1	0	1	1	0	1	1	0	1	1	0	1	1
73358	1700054M17Rik	0	0	0.0878508	0.602193	0	1	1	0	1	1	0	1	1	0	1	1	0	1	1	0	1	1
74272	1700054O19Rik	0	0	0	0.03682	0	1	1	0	1	1	0	1	1	0	1	1	0	1	1	0	1	1
73397	1700055C04Rik	0	0	0	0	0	1	1	0	1	1	0	1	1	0	1	1	0	1	1	0	1	1
73405	1700055D18Rik	0.224827	0.265319	0.174238	0.298733	0	1	1	0.170335	0.901164	0.849542	-0.47002	0.731828	0.626949	0	1	1	0	1	1	-0.610248	0.355739	0.245178
102640035	1700055K11Rik	0	0	0	0	0	1	1	0	1	1	0	1	1	0	1	1	0	1	1	0	1	1
73363	1700056E22Rik	0	0	0.0406085	0.0382271	0	1	1	0	1	1	0	1	1	0	1	1	0	1	1	0	1	1
78459	1700057G04Rik	0	0	0	0	0	1	1	0	1	1	0	1	1	0	1	1	0	1	1	0	1	1
78460	1700057H15Rik	0	0	0	0	0	1	1	0	1	1	0	1	1	0	1	1	0	1	1	0	1	1
73375	1700057H21Rik	0	0	0	0	0	1	1	0	1	1	0	1	1	0	1	1	0	1	1	0	1	1
73425	1700060C16Rik	0	0	0	0	0	1	1	0	1	1	0	1	1	0	1	1	0	1	1	0	1	1
73399	1700060C20Rik	0	0	0	0	0	1	1	0	1	1	0	1	1	0	1	1	0	1	1	0	1	1
73378	1700060L04Rik	0	0	0	0	0	1	1	0	1	1	0	1	1	0	1	1	0	1	1	0	1	1
67335	1700060O08Rik	0	0	0.11077	0.934174	0	1	1	0	1	1	-4.46206	5.52625e-05	3.67302e-06	0	1	1	-2.72347	0.000967238	0.000188797	-2.713	0.000665732	8.22425e-05
73438	1700061F12Rik	0	0	0	0	0	1	1	0	1	1	0	1	1	0	1	1	0	1	1	0	1	1
78625	1700061G19Rik	0.228978	0.0445681	0.0897179	0.0979956	0	1	1	0	1	1	0	1	1	0	1	1	0	1	1	0	1	1
433646	1700061I17Rik	0	0	0	0	0	1	1	0	1	1	0	1	1	0	1	1	0	1	1	0	1	1
76993	1700061J23Rik	0	0	0	0	0	1	1	0	1	1	0	1	1	0	1	1	0	1	1	0	1	1
73440	1700062C10Rik	0	0	0	0	0	1	1	0	1	1	0	1	1	0	1	1	0	1	1	0	1	1
73454	1700063A18Rik	0	0	0	0	0	1	1	0	1	1	0	1	1	0	1	1	0	1	1	0	1	1
78500	1700063D05Rik	0.0870551	0	0	0	0	1	1	0	1	1	0	1	1	0	1	1	0	1	1	0	1	1
74269	1700063H04Rik	0	0	0	0	0	1	1	0	1	1	0	1	1	0	1	1	0	1	1	0	1	1
73452	1700063O14Rik	0.102104	0	0	0	0	1	1	0	1	1	0	1	1	0	1	1	0	1	1	0	1	1
102633032	1700064H15Rik	0.251886	0	0.0458853	0.0333579	0	1	1	0	1	1	0	1	1	0	1	1	0	1	1	0	1	1
73400	1700064J06Rik	0	0	0	0	0	1	1	0	1	1	0	1	1	0	1	1	0	1	1	0	1	1
73457	1700064M15Rik	0	0	0	0	0	1	1	0	1	1	0	1	1	0	1	1	0	1	1	0	1	1
73410	1700065D16Rik	0.0546681	0.0482586	0.0547226	0.117847	0	1	1	0	1	1	0	1	1	0	1	1	0	1	1	0	1	1
78462	1700065I16Rik	0	0	0	0	0	1	1	0	1	1	0	1	1	0	1	1	0	1	1	0	1	1
73409	1700065J11Rik	0	0	0	0	0	1	1	0	1	1	0	1	1	0	1	1	0	1	1	0	1	1
73455	1700065J18Rik	0	0	0.224042	0.247168	0	1	1	0	1	1	0	1	1	0	1	1	0	1	1	0	1	1
73408	1700065L07Rik	0	0	0	0	0	1	1	0	1	1	0	1	1	0	1	1	0	1	1	0	1	1
76609	1700065O20Rik	0	0	0	0	0	1	1	0	1	1	0	1	1	0	1	1	0	1	1	0	1	1
73426	1700066B17Rik	0	0	0	0	0	1	1	0	1	1	0	1	1	0	1	1	0	1	1	0	1	1
73449	1700066B19Rik	0	0	0	0	0	1	1	0	1	1	0	1	1	0	1	1	0	1	1	0	1	1
78654	1700066C05Rik	0	0	0	0	0	1	1	0	1	1	0	1	1	0	1	1	0	1	1	0	1	1
67339	1700066J03Rik	0	0	0	0	0	1	1	0	1	1	0	1	1	0	1	1	0	1	1	0	1	1
73467	1700066M21Rik	4.40776	2.8478	4.16412	4.76742	0.649862	0.0534227	0.0194989	-0.0180138	0.953736	0.926325	-0.125668	0.644398	0.520091	-0.662022	0.0196063	0.0058779	-0.779674	0.00296008	0.000776039	-0.11476	0.585343	0.471676
73471	1700066N21Rik	0	0	0	0	0	1	1	0	1	1	0	1	1	0	1	1	0	1	1	0	1	1
74916	1700066O22Rik	0	0	0	0	0	1	1	0	1	1	0	1	1	0	1	1	0	1	1	0	1	1
73475	1700067G17Rik	0	0	0	0	0	1	1	0	1	1	0	1	1	0	1	1	0	1	1	0	1	1
73453	1700067K01Rik	0.134521	0.25875	0.219105	0.223769	0	1	1	-0.547921	0.606219	0.47255	0	1	1	0.137391	0.880024	0.818572	0	1	1	-0.0802437	0.891615	0.844653
68224	1700067P10Rik	0	0	0	0	0	1	1	0	1	1	0	1	1	0	1	1	0	1	1	0	1	1
381707	1700069L16Rik	0	0	0	0	0	1	1	0	1	1	0	1	1	0	1	1	0	1	1	0	1	1
73531	1700069P05Rik	0	0	0	0	0	1	1	0	1	1	0	1	1	0	1	1	0	1	1	0	1	1
73485	1700071G01Rik	0	0	0	0.324707	0	1	1	0	1	1	0	1	1	0	1	1	0	1	1	0	1	1
237880	1700071K01Rik	0	0	0.213327	1.08683	0	1	1	-1.15533	0.469685	0.32903	-3.20772	0.0293099	0.0086037	0	1	1	-2.1878	0.0282279	0.0127259	-2.11511	0.0428367	0.0168824
73504	1700071M16Rik	0.323867	1.05405	0.398043	0.15358	-1.99758	0.0500149	0.0178312	-0.310062	0.74968	0.646415	0.728214	0.536147	0.401147	1.71178	0.00079618	0.000116841	2.7334	0.000267818	3.74785e-05	1.01903	0.0336826	0.0124915
73529	1700072B07Rik	0	0	0	0	0	1	1	0	1	1	0	1	1	0	1	1	0	1	1	0	1	1
78629	1700072I22Rik	0	0	0	0	0	1	1	0	1	1	0	1	1	0	1	1	0	1	1	0	1	1
73505	1700072O05Rik	0	0	0	0	0	1	1	0	1	1	0	1	1	0	1	1	0	1	1	0	1	1
381827	1700073E17Rik	0.0081547	0	0	0.0118363	0	1	1	0	1	1	0	1	1	0	1	1	0	1	1	0	1	1
73480	1700074H08Rik	0	0	0.280875	0.774779	0	1	1	0	1	1	0	1	1	0	1	1	0	1	1	0	1	1
73481	1700074P13Rik	0	0	0	0	0	1	1	0	1	1	0	1	1	0	1	1	0	1	1	0	1	1
73532	1700080E11Rik	0	0	0	0	0	1	1	0	1	1	0	1	1	0	1	1	0	1	1	0	1	1
73488	1700080G11Rik	0.0240451	0	0	0	0	1	1	0	1	1	0	1	1	0	1	1	0	1	1	0	1	1
73533	1700080G18Rik	0.0237145	0.0383205	0.127268	0.165304	0	1	1	0	1	1	0	1	1	0	1	1	0	1	1	0	1	1
73489	1700080N15Rik	1.245	0	0.467936	4.43655	0	1	1	0	1	1	-1.01852	0.325072	0.203636	0	1	1	-2.08793	0.0778211	0.043694	-2.44096	0.0110975	0.00301542
74279	1700080O16Rik	0	0	0	0	0	1	1	0	1	1	0	1	1	0	1	1	0	1	1	0	1	1
73477	1700081H04Rik	0	0	0	0	0	1	1	0	1	1	0	1	1	0	1	1	0	1	1	0	1	1
67348	1700083H02Rik	0	0	0	0	0	1	1	0	1	1	0	1	1	0	1	1	0	1	1	0	1	1
76720	1700084D21Rik	0	0	0	0	0	1	1	0	1	1	0	1	1	0	1	1	0	1	1	0	1	1
67350	1700084E18Rik	0	0	0.045365	0.0849785	0	1	1	0	1	1	0	1	1	0	1	1	0	1	1	0	1	1
74280	1700084F23Rik	0	0	0	0	0	1	1	0	1	1	0	1	1	0	1	1	0	1	1	0	1	1
73486	1700084J12Rik	0	0	0	0	0	1	1	0	1	1	0	1	1	0	1	1	0	1	1	0	1	1
73487	1700084M14Rik	0	0	0	0	0	1	1	0	1	1	0	1	1	0	1	1	0	1	1	0	1	1
74283	1700085C21Rik	0	0	0	0.118867	0	1	1	0	1	1	0	1	1	0	1	1	0	1	1	0	1	1
74282	1700086D15Rik	0.586589	0.305196	0.310064	1.39331	1.00912	0.354502	0.228103	0.939251	0.154275	0.0739873	-1.00346	0.107468	0.0467402	-0.0757681	0.916818	0.870187	-2.01462	0.00273841	0.000704895	-1.94589	8.71372e-05	6.2106e-06
74284	1700086L19Rik	7.7013	2.42664	6.11745	0.332857	1.54271	0.00142135	0.000218783	0.375705	0.224925	0.12235	4.18165	1.70403e-06	4.55612e-08	-1.17491	0.0131506	0.00359256	2.64006	6.08801e-05	6.21513e-06	3.82174	1.13461e-05	4.86895e-07
73516	1700086O06Rik	0.389219	0.326577	0.33799	0.337849	0	1	1	0.213442	0.756229	0.655079	0.0507217	0.95495	0.928695	0.0549609	0.947143	0.915866	0	1	1	-0.160741	0.763105	0.679182
67349	1700086P04Rik	0	0	0	0.0459199	0	1	1	0	1	1	0	1	1	0	1	1	0	1	1	0	1	1
76619	1700087I21Rik	1.11097	0.642929	0.157346	0.862326	0	1	1	2.05999	0.0349861	0.010705	0.41863	0.704294	0.591575	0	1	1	0	1	1	0	1	1
27660	1700088E04Rik	3.44355	4.05889	3.32723	3.43777	-0.324209	0.579938	0.449735	-0.106791	0.818768	0.73898	-0.150289	0.786587	0.696125	0.214607	0.470633	0.3366	0.17526	0.619285	0.542181	-0.0413209	0.892434	0.846014
73553	1700091H14Rik	0	0	0	0	0	1	1	0	1	1	0	1	1	0	1	1	0	1	1	0	1	1
67357	1700092C02Rik	0	0	0	0	0	1	1	0	1	1	0	1	1	0	1	1	0	1	1	0	1	1
73554	1700092C10Rik	0	0	0	0	0	1	1	0	1	1	0	1	1	0	1	1	0	1	1	0	1	1
73576	1700092E19Rik	0	0	0	0	0	1	1	0	1	1	0	1	1	0	1	1	0	1	1	0	1	1
73536	1700092K14Rik	0	0	0	0	0	1	1	0	1	1	0	1	1	0	1	1	0	1	1	0	1	1
74307	1700092M07Rik	0	0	0.051931	0	0	1	1	0	1	1	0	1	1	0	1	1	0	1	1	0	1	1
67358	1700093K21Rik	0	0	0.0117546	0.0330582	0	1	1	0	1	1	0	1	1	0	1	1	0	1	1	0	1	1
73545	1700094D03Rik	0.293387	2.09477	0.18856	0.728531	-3.14706	0.0103536	0.00247984	0.18184	0.899328	0.846377	-1.52765	0.199614	0.106096	3.32619	2.34362e-06	9.50842e-08	1.62614	0.00253319	0.000637364	-1.71361	0.00226809	0.000399929
67523	1700094J05Rik	1.37312	1.43109	0.893474	0.986836	-0.519435	0.463056	0.331133	0.108949	0.868783	0.803158	0.426047	0.604934	0.476061	0.600007	0.20015	0.108543	0.934293	0.136836	0.0866138	0.31592	0.589009	0.475979
74304	1700094M24Rik	0	0	0	0	0	1	1	0	1	1	0	1	1	0	1	1	0	1	1	0	1	1
76995	1700095A13Rik	0	0	0	0	0	1	1	0	1	1	0	1	1	0	1	1	0	1	1	0	1	1
67524	1700095A21Rik	0	0	0	0	0	1	1	0	1	1	0	1	1	0	1	1	0	1	1	0	1	1
67360	1700095B10Rik	0	0	0	0	0	1	1	0	1	1	0	1	1	0	1	1	0	1	1	0	1	1
74293	1700095J03Rik	0	0	0.0479464	0.275979	0	1	1	0	1	1	0	1	1	0	1	1	0	1	1	0	1	1
73563	1700095J12Rik	0.128974	0	0.0757595	0.493401	0	1	1	0	1	1	-1.6305	0.201157	0.107327	0	1	1	-1.68496	0.125843	0.0783061	-2.28435	0.0243764	0.00829753
67927	1700096J18Rik	0	0	0	0	0	1	1	0	1	1	0	1	1	0	1	1	0	1	1	0	1	1
73571	1700096K18Rik	0.100284	0	0.197974	0.120099	0	1	1	-0.662548	0.501569	0.360096	0	1	1	-0.841633	0.319437	0.199551	0	1	1	0.422275	0.611646	0.49999
73557	1700096P03Rik	0	0	0	0	0	1	1	0	1	1	0	1	1	0	1	1	0	1	1	0	1	1
67522	1700097N02Rik	0	0	0	0	0	1	1	0	1	1	0	1	1	0	1	1	0	1	1	0	1	1
76624	1700099I09Rik	1.18609	0.329399	0.311439	0.966841	1.65354	0.0221155	0.00636773	1.97307	0.000382473	3.72717e-05	0.149827	0.757461	0.658997	0.330406	0.448313	0.314518	-1.50597	0.00213579	0.000514456	-1.82576	2.09902e-05	1.04502e-06
74982	1700100I10Rik	0	0	0	0	0	1	1	0	1	1	0	1	1	0	1	1	0	1	1	0	1	1
73584	1700100L14Rik	0	0	0	0	0	1	1	0	1	1	0	1	1	0	1	1	0	1	1	0	1	1
619302	1700101G07Rik	0	0	0	0	0	1	1	0	1	1	0	1	1	0	1	1	0	1	1	0	1	1
100504641	1700101I11Rik	0.614128	1.62614	1.7359	1.23712	0	1	1	-1.43487	0.0209745	0.0055384	-0.937609	0.207687	0.111819	-0.514525	0.425113	0.292789	-0.0661937	0.932247	0.911282	0.485771	0.323684	0.216791
73575	1700101O22Rik	0	0	0	0	0	1	1	0	1	1	0	1	1	0	1	1	0	1	1	0	1	1
68230	1700102H20Rik	0.144043	0	0.317109	0.577675	0	1	1	0	1	1	0	1	1	0	1	1	0	1	1	0	1	1
74290	1700102J08Rik	0	0	0	0	0	1	1	0	1	1	0	1	1	0	1	1	0	1	1	0	1	1
112418	1700102P08Rik	0.0947925	0	0.134046	0.316318	0	1	1	0	1	1	0	1	1	0	1	1	0	1	1	-1.05108	0.174114	0.0983075
100504592	1700104B16Rik	0	0	0	0	0	1	1	0	1	1	0	1	1	0	1	1	0	1	1	0	1	1
73592	1700104L18Rik	0	0	0	0	0	1	1	0	1	1	0	1	1	0	1	1	0	1	1	0	1	1
102640957	1700105F02Rik	0	0	0	0	0	1	1	0	1	1	0	1	1	0	1	1	0	1	1	0	1	1
654802	1700105P06Rik	0.205689	0	0	0.071251	0	1	1	0	1	1	0	1	1	0	1	1	0	1	1	0	1	1
73272	1700108F19Rik	0	0	0	0	0	1	1	0	1	1	0	1	1	0	1	1	0	1	1	0	1	1
68245	1700108J01Rik	0	0	0	0	0	1	1	0	1	1	0	1	1	0	1	1	0	1	1	0	1	1
73560	1700108N06Rik	0	0	0	0	0	1	1	0	1	1	0	1	1	0	1	1	0	1	1	0	1	1
67355	1700109G14Rik	0	0	0.0194469	0	0	1	1	0	1	1	0	1	1	0	1	1	0	1	1	0	1	1
78471	1700109G15Rik	0	0	0	0	0	1	1	0	1	1	0	1	1	0	1	1	0	1	1	0	1	1
77036	1700109H08Rik	0.806234	0.424054	0.706715	1.95476	1.04246	0.292382	0.175808	0.420236	0.495218	0.353569	-1.09694	0.0861344	0.0348872	-0.626994	0.309436	0.19158	-2.14462	0.00718207	0.00232721	-1.50313	0.000988433	0.000139246
73591	1700109I08Rik	0	0	0	0	0	1	1	0	1	1	0	1	1	0	1	1	0	1	1	0	1	1
74303	1700109K24Rik	1.627	0.460284	0.876162	2.3827	2.02086	0.106554	0.04692	1.08318	0.115886	0.0509332	-0.534663	0.493595	0.358602	-0.935793	0.165813	0.0850311	-2.55625	0.011147	0.00402452	-1.61825	0.00422901	0.000873088
76634	1700110C19Rik	0.296225	0	0.612045	1.06295	0	1	1	-0.83006	0.372039	0.238421	-1.57183	0.152402	0.0740579	-0.287635	0.750984	0.647909	0	1	1	-0.734134	0.262195	0.165477
73549	1700110I01Rik	0	0	0	0	0	1	1	0	1	1	0	1	1	0	1	1	0	1	1	0	1	1
77001	1700110I07Rik	0.0267779	0	0.020932	0	0	1	1	0	1	1	0	1	1	0	1	1	0	1	1	0	1	1
73558	1700110K17Rik	10.6849	9.04259	4.53211	4.26855	0.167755	0.748365	0.649926	1.16768	0.00369792	0.000627309	1.23652	0.00898642	0.00190631	1.00434	0.00238553	0.000441707	1.06327	0.00391562	0.0010935	0.0665181	0.825846	0.755153
74305	1700111N16Rik	0	0	0	0	0	1	1	0	1	1	0	1	1	0	1	1	0	1	1	0	1	1
73611	1700112D23Rik	0.167554	0.189171	0.141336	0.280016	0	1	1	0	1	1	0	1	1	0	1	1	0	1	1	-0.576529	0.479298	0.361892
73590	1700112H15Rik	0	0	0	0	0	1	1	0	1	1	0	1	1	0	1	1	0	1	1	0	1	1
68246	1700112J05Rik	0	0	0	0	0	1	1	0	1	1	0	1	1	0	1	1	0	1	1	0	1	1
76628	1700112J16Rik	0.0725351	0.636336	0.260542	0.298659	-2.66965	0.0154774	0.00406805	-1.70203	0.0648846	0.0238979	-1.86964	0.0722345	0.0276995	0.965746	0.124347	0.0590234	0.797384	0.244083	0.173952	-0.169335	0.79547	0.717297
102640882	1700112M02Rik	0	0	0	0	0	1	1	0	1	1	0	1	1	0	1	1	0	1	1	0	1	1
73593	1700112N08Rik	0	0	0	0	0	1	1	0	1	1	0	1	1	0	1	1	0	1	1	0	1	1
76642	1700113A16Rik	8.98295	4.44293	5.3901	2.66026	0.873228	0.0404756	0.0137076	0.767976	0.0187171	0.00481087	1.66118	0.000451993	4.68771e-05	-0.10872	0.768968	0.672198	0.789673	0.0196652	0.00813095	0.899109	0.00663429	0.001557
76640	1700113H08Rik	0	0	0	0.0608615	0	1	1	0	1	1	0	1	1	0	1	1	0	1	1	0	1	1
78639	1700116B05Rik	0	0	0	0	0	1	1	0	1	1	0	1	1	0	1	1	0	1	1	0	1	1
76649	1700119H24Rik	0	0	0	0	0	1	1	0	1	1	0	1	1	0	1	1	0	1	1	0	1	1
73600	1700120C14Rik	0	0	0.230455	0.302111	0	1	1	0	1	1	0	1	1	0	1	1	0	1	1	0	1	1
73606	1700120E14Rik	0.0260017	0.158252	0.0131203	0	0	1	1	0	1	1	0	1	1	0	1	1	0	1	1	0	1	1
74314	1700120G07Rik	0	0	0	0	0	1	1	0	1	1	0	1	1	0	1	1	0	1	1	0	1	1
68232	1700120K04Rik	0.0925144	0	0	0.0680767	0	1	1	0	1	1	0	1	1	0	1	1	0	1	1	0	1	1
76643	1700121L16Rik	0	0	0	0	0	1	1	0	1	1	0	1	1	0	1	1	0	1	1	0	1	1
76639	1700121N20Rik	0	0	0	0	0	1	1	0	1	1	0	1	1	0	1	1	0	1	1	0	1	1
78640	1700122C19Rik	0	0	0	0	0	1	1	0	1	1	0	1	1	0	1	1	0	1	1	0	1	1
73619	1700122E12Rik	0.0414951	0	0	0	0	1	1	0	1	1	0	1	1	0	1	1	0	1	1	0	1	1
76651	1700122O11Rik	0	0	0	0	0	1	1	0	1	1	0	1	1	0	1	1	0	1	1	0	1	1
76997	1700123C12Rik	0.92706	0.17147	0.184773	0.661442	2.24174	0.160631	0.0796752	2.14055	0.045416	0.0150262	-0.254328	0.797138	0.708969	0	1	1	-2.496	0.00858349	0.0029065	-2.4048	0.00160921	0.000256791
76728	1700123J17Rik	0	0	0	0.0452514	0	1	1	0	1	1	0	1	1	0	1	1	0	1	1	0	1	1
76658	1700123K08Rik	0.0479803	0	0	0.212175	0	1	1	0	1	1	0	1	1	0	1	1	0	1	1	0	1	1
78482	1700123L14Rik	0.476197	0	0.0753318	0	2.01432	0.304813	0.18572	1.96801	0.217837	0.117146	3.61635	0.0552387	0.0197205	0	1	1	0	1	1	0	1	1
100503636	1700123M08Rik	0.609849	0.72636	0.467572	0.903149	-0.084857	0.927517	0.885831	0.691427	0.363401	0.231131	-0.286498	0.700815	0.587283	0.77799	0.270552	0.160696	-0.19602	0.750239	0.685678	-0.990909	0.108042	0.0536083
73624	1700123O12Rik	0	0	0	0	0	1	1	0	1	1	0	1	1	0	1	1	0	1	1	0	1	1
58248	1700123O20Rik	1.87992	2.85369	2.16467	2.23814	-0.813273	0.172932	0.0878546	-0.475883	0.305486	0.183405	-0.535998	0.281532	0.167698	0.3333	0.380348	0.252815	0.282952	0.433728	0.350082	-0.0674755	0.826078	0.755691
68238	1700123O21Rik	0.0562121	0.888774	0.409244	1.79551	0	1	1	0	1	1	-3.49492	0.0011858	0.000150674	0	1	1	-0.826352	0.228747	0.161085	-2.2094	0.00129927	0.000196311
67934	1700124L16Rik	0.219325	0.670403	1.0054	1.44886	0	1	1	0	1	1	0	1	1	0	1	1	0	1	1	0	1	1
73605	1700124M09Rik	0	0	0	0	0	1	1	0	1	1	0	1	1	0	1	1	0	1	1	0	1	1
73628	1700125G02Rik	0	0	0.142679	0	0	1	1	0	1	1	0	1	1	0	1	1	0	1	1	0	1	1
76657	1700125G22Rik	0	0	0	0	0	1	1	0	1	1	0	1	1	0	1	1	0	1	1	0	1	1
73609	1700125H03Rik	0.381824	0.14386	0.0741917	0.101201	0	1	1	0	1	1	0	1	1	0	1	1	0	1	1	0	1	1
73634	1700125H20Rik	0	0	0	0	0	1	1	0	1	1	0	1	1	0	1	1	0	1	1	0	1	1
76648	1700126G02Rik	0.0369097	0	0.128241	0.523725	0	1	1	0	1	1	0	1	1	0	1	1	0	1	1	0	1	1
73639	1700126H18Rik	0	0	0	0	0	1	1	0	1	1	0	1	1	0	1	1	0	1	1	0	1	1
102632292	1700127F24Rik	0	0	0	0	0	1	1	0	1	1	0	1	1	0	1	1	0	1	1	0	1	1
73631	1700128A07Rik	0	0	0	0	0	1	1	0	1	1	0	1	1	0	1	1	0	1	1	0	1	1
76669	1700128F08Rik	0	0	0	0	0	1	1	0	1	1	0	1	1	0	1	1	0	1	1	0	1	1
67932	1700129C05Rik	0	0	0	0	0	1	1	0	1	1	0	1	1	0	1	1	0	1	1	0	1	1
69030	1810006J02Rik	0	0	0	0	0	1	1	0	1	1	0	1	1	0	1	1	0	1	1	0	1	1
69054	1810007C17Rik	0	0	0.0497916	0	0	1	1	0	1	1	0	1	1	0	1	1	0	1	1	0	1	1
69055	1810007D17Rik	0	0	0	0	0	1	1	0	1	1	0	1	1	0	1	1	0	1	1	0	1	1
100503969	1810008I18Rik	0	0	0	0	0	1	1	0	1	1	0	1	1	0	1	1	0	1	1	0	1	1
66276	1810009A15Rik	1.74437	3.65365	2.28316	2.64132	-1.47524	0.0895539	0.0374649	-0.773587	0.324064	0.198708	-0.923305	0.263257	0.152911	0.710435	0.0898388	0.038981	0.550561	0.142336	0.0909404	-0.155048	0.704779	0.607282
73626	1810009J06Rik	0	0	0	0	0	1	1	0	1	1	0	1	1	0	1	1	0	1	1	0	1	1
100040049	1810010D01Rik	0	0	0	0	0	1	1	0	1	1	0	1	1	0	1	1	0	1	1	0	1	1
69066	1810010H24Rik	0.208579	0.216597	0.364872	1.59856	0	1	1	-1.26419	0.159375	0.077438	-3.61707	0.000428778	4.39842e-05	-0.679991	0.327662	0.206923	-3.02407	0.000354416	5.24048e-05	-2.34222	2.49772e-05	1.29826e-06
69069	1810011H11Rik	0	0	0	0.0240037	0	1	1	0	1	1	0	1	1	0	1	1	0	1	1	0	1	1
69108	1810012K16Rik	0.0569392	0	0.0364092	0	0	1	1	0	1	1	0	1	1	0	1	1	0	1	1	0	1	1
69050	1810013A23Rik	0	0	0	0	0	1	1	0	1	1	0	1	1	0	1	1	0	1	1	0	1	1
69042	1810013D15Rik	0.0692815	0	0	0	0	1	1	0	1	1	0	1	1	0	1	1	0	1	1	0	1	1
69053	1810013L24Rik	10.9932	15.203	12.6837	14.6562	-0.487668	0.0338927	0.0108895	-0.17543	0.375784	0.241826	-0.387372	0.0734198	0.0282993	0.31288	0.0340233	0.0116808	0.099367	0.536127	0.453593	-0.214691	0.122682	0.0630161
66263	1810014B01Rik	0.720601	0.51733	0.507139	0.917952	0.0299213	0.982644	0.972254	0.381809	0.69472	0.575879	-0.444148	0.667741	0.54701	0.363569	0.588096	0.459974	-0.481875	0.480675	0.396927	-0.830522	0.147989	0.0799009
69166	1810018F18Rik	0	0	0	0	0	1	1	0	1	1	0	1	1	0	1	1	0	1	1	0	1	1
69771	1810019D21Rik	0	0	0.0238424	0	0	1	1	0	1	1	0	1	1	0	1	1	0	1	1	0	1	1
69086	1810019N24Rik	0	0	0	0	0	1	1	0	1	1	0	1	1	0	1	1	0	1	1	0	1	1
613264	1810020O05Rik	0.0589514	0.446023	0.103893	0	0	1	1	-0.353931	0.817704	0.737614	0	1	1	0	1	1	0	1	1	0	1	1
69120	1810021B22Rik	1.73047	0.918336	0.847978	0.616521	0.567813	0.629268	0.507552	0.805269	0.299058	0.178116	1.26033	0.200655	0.106932	0.293404	0.729124	0.621502	0	1	1	0.463554	0.490768	0.373584
69126	1810022K09Rik	1.45018	0.691921	1.13768	2.5312	0.67158	0.366645	0.239013	0.119529	0.82988	0.752673	-0.714104	0.231233	0.128871	-0.574015	0.295744	0.180679	-1.38752	0.0475404	0.0240559	-0.827604	0.0654093	0.0287576
329509	1810024B03Rik	0.0382933	0	0.0368777	0	0	1	1	0	1	1	0	1	1	0	1	1	0	1	1	0	1	1
69170	1810026B05Rik	1.65705	0.986032	2.12343	6.40358	1.36448	0.210985	0.113659	0.00368018	0.995857	0.993575	-1.53802	0.0516547	0.0180195	-1.34259	0.00224119	0.00040984	-2.91493	0.00209653	0.000502153	-1.56205	0.0043724	0.000917854
69155	1810030O07Rik	3.33632	2.35394	3.21922	4.5917	0.610093	0.135431	0.0638831	0.110848	0.705393	0.590491	-0.334171	0.318631	0.198557	-0.495673	0.0607815	0.0240345	-0.944757	0.00795722	0.00264118	-0.448846	0.0538926	0.0225395
66293	1810032O08Rik	0.112126	0.27341	0.163712	0.275275	0	1	1	0	1	1	0	1	1	0	1	1	0	1	1	0	1	1
66503	1810034E14Rik	0.034252	0	0.277675	0.534533	0	1	1	-1.36417	0.301754	0.18041	-2.78937	0.0295951	0.00872662	-0.643446	0.535658	0.402419	-2.11246	0.0243361	0.010657	-1.42609	0.0519346	0.0215341
78328	1810035K13Rik	0	0	0	0	0	1	1	0	1	1	0	1	1	0	1	1	0	1	1	0	1	1
67704	1810037I17Rik	1.86665	3.28646	3.9813	3.98895	-0.67411	0.255373	0.147062	-0.809899	0.0650444	0.0239849	-0.981544	0.0353811	0.0110599	-0.147573	0.774002	0.678577	-0.306696	0.495724	0.411997	-0.171159	0.603204	0.490997
78312	1810041H14Rik	0	0.157647	0	0.0224264	0	1	1	0	1	1	0	1	1	0	1	1	0	1	1	0	1	1
72301	1810041L15Rik	8.49431	1.5814	3.82498	1.6385	2.42328	6.87901e-07	1.67387e-08	1.22645	1.38081e-05	5.93292e-07	2.4409	4.57018e-07	8.24234e-09	-1.19601	2.29667e-05	1.59106e-06	0.0255659	0.938451	0.91871	1.21486	0.000105034	7.87645e-06
67884	1810043G02Rik	1.90595	1.30648	1.42538	0.998636	0.226119	0.799616	0.714732	0.164753	0.785628	0.694818	0.575807	0.42782	0.294575	-0.0638213	0.894494	0.838855	0.352789	0.482102	0.398305	0.413249	0.292761	0.190261
69798	1810044D09Rik	0	0	0	0	0	1	1	0	1	1	0	1	1	0	1	1	0	1	1	0	1	1
69809	1810046K07Rik	0	0	0	0	0	1	1	0	1	1	0	1	1	0	1	1	0	1	1	0	1	1
75601	1810049I09Rik	0	0	0	0	0	1	1	0	1	1	0	1	1	0	1	1	0	1	1	0	1	1
69857	1810053B23Rik	0	0	0	0	0	1	1	0	1	1	0	1	1	0	1	1	0	1	1	0	1	1
72056	1810055G02Rik	4.45615	4.33375	3.15147	2.94255	-0.0206784	0.961429	0.937173	0.423863	0.0957395	0.0397908	0.603444	0.060858	0.0221665	0.446822	0.0537027	0.0206194	0.618871	0.0300658	0.0137105	0.1758	0.407137	0.292753
67705	1810058I24Rik	1.36607	1.25077	1.46973	1.11129	-0.280091	0.750962	0.653643	-0.37565	0.506779	0.365686	0.134806	0.85681	0.788245	-0.115831	0.845918	0.769682	0.404045	0.471214	0.387154	0.509318	0.152531	0.0830992
69820	1810059H22Rik	0.0830083	0.0781554	0.0813601	0.0941436	-0.241194	0.828396	0.749708	0.125638	0.887035	0.829426	-0.126851	0.901845	0.852539	0.327985	0.60117	0.473938	0.107967	0.884523	0.850149	-0.230819	0.70053	0.60232
72282	1810062G17Rik	0	0	0.0212512	0.040577	0	1	1	0	1	1	0	1	1	0	1	1	0	1	1	0	1	1
75602	1810062O18Rik	2.08215	2.76869	1.41055	2.79679	-0.639662	0.478026	0.34566	0.0339383	0.968883	0.950841	-1.16245	0.113934	0.0505225	0.656843	0.205408	0.112458	-0.537056	0.302102	0.225039	-1.18027	0.00975059	0.0025661
69854	1810063I02Rik	0	0	0	0	0	1	1	0	1	1	0	1	1	0	1	1	0	1	1	0	1	1
69862	1810064F22Rik	0	0	0	0	0	1	1	0	1	1	0	1	1	0	1	1	0	1	1	0	1	1
69864	1810065E05Rik	0	0	0	0	0	1	1	0	1	1	0	1	1	0	1	1	0	1	1	0	1	1
72285	1810073O08Rik	0	0	0	0	0	1	1	0	1	1	0	1	1	0	1	1	0	1	1	0	1	1
76516	2010001A14Rik	0	0.860143	0.0967643	0	0	1	1	0	1	1	0	1	1	0	1	1	0	1	1	0	1	1
69861	2010003K11Rik	0	0	0	0	0	1	1	0	1	1	0	1	1	0	1	1	0	1	1	0	1	1
76770	2010005H15Rik	0	0	0	0	0	1	1	0	1	1	0	1	1	0	1	1	0	1	1	0	1	1
72340	2010009K17Rik	0.0881321	0	0.146365	0.069876	0	1	1	0	1	1	0	1	1	0	1	1	0	1	1	0	1	1
100503117	2010010A06Rik	0	0	0	0.123005	0	1	1	0	1	1	0	1	1	0	1	1	0	1	1	0	1	1
69206	2010016I18Rik	0	0	0.0126661	0	0	1	1	0	1	1	0	1	1	0	1	1	0	1	1	0	1	1
72104	2010106C02Rik	0.151698	0	0.0361488	1.11004	0	1	1	0	1	1	0	1	1	0	1	1	0	1	1	0	1	1
67715	2010106E10Rik	0	0	0	0	0	1	1	0	1	1	0	1	1	0	1	1	0	1	1	0	1	1
70257	2010107E04Rik	24.5661	48.0349	25.2017	22.3034	-1.1974	0.00583987	0.00122662	-0.262474	0.510332	0.369447	-0.00556083	0.992118	0.986675	0.930522	0.000171895	1.83646e-05	1.19859	0.000137889	1.66404e-05	0.264096	0.323073	0.216162
75610	2010109A12Rik	0.124768	0	0.114502	0.182219	0	1	1	0	1	1	0	1	1	0	1	1	0	1	1	0	1	1
67038	2010109I03Rik	0	0.0904328	0	0	0	1	1	0	1	1	0	1	1	0	1	1	0	1	1	0	1	1
100503082	2010110K18Rik	0	0	0	0	0	1	1	0	1	1	0	1	1	0	1	1	0	1	1	0	1	1
72061	2010111I01Rik	0.601084	0.415397	0.310459	0.817309	1.04235	0.162888	0.0813147	1.028	0.0212441	0.00562669	-0.34747	0.434145	0.300353	-0.00599315	0.993518	0.98922	-1.40183	0.0194003	0.00799357	-1.38108	0.000458929	5.121e-05
66547	2010203P06Rik	0	0	0	0	0	1	1	0	1	1	0	1	1	0	1	1	0	1	1	0	1	1
68355	2010204K13Rik	6.6074	4.24183	4.93303	2.751	0.503932	0.299139	0.181401	0.20103	0.568344	0.431501	1.52145	0.0308112	0.00920956	-0.310175	0.406027	0.276087	1.00563	0.145871	0.0936274	1.31478	0.0266813	0.00928037
72097	2010300C02Rik	20.0413	0.52634	4.15904	0.683723	5.20946	1.58019e-07	2.43375e-09	2.21847	8.04155e-07	1.55926e-08	4.92695	8.14707e-09	3.59626e-11	-2.99345	5.22297e-05	4.34763e-06	-0.28733	0.607745	0.529837	2.72219	1.20953e-05	5.30137e-07
72122	2010308F09Rik	0	0	0	0.14228	0	1	1	0	1	1	0	1	1	0	1	1	0	1	1	0	1	1
70018	2010309G21Rik	0	0	0	0	0	1	1	0	1	1	0	1	1	0	1	1	0	1	1	0	1	1
72131	2010310C07Rik	0.133688	0	0	0.196092	0	1	1	0	1	1	0	1	1	0	1	1	0	1	1	0	1	1
630836	2010315B03Rik	1.88804	1.68664	2.83962	3.43072	0.221684	0.730111	0.628196	-0.596583	0.220047	0.118688	-0.995282	0.0496821	0.0171058	-0.81723	0.131198	0.0631956	-1.21057	0.0214524	0.00910724	-0.410257	0.331287	0.223587
72093	2010320M18Rik	0.0509305	0.788119	0.736025	0.670174	0	1	1	-2.31619	0.0180568	0.00457835	0	1	1	0.441906	0.535684	0.40265	0	1	1	0.0513463	0.944757	0.918782
69881	2010320O07Rik	0	0	0.0400449	0	0	1	1	0	1	1	0	1	1	0	1	1	0	1	1	0	1	1
72275	2200002D01Rik	0.12174	0	0.859012	0.073143	0	1	1	0	1	1	0	1	1	0	1	1	0	1	1	1.14363	0.352399	0.241894
69147	2200002J24Rik	0	0	0	0	0	1	1	0	1	1	0	1	1	0	1	1	0	1	1	0	1	1
70057	2210008F06Rik	0.65565	0.28837	0.415256	0.240937	1.22679	0.299791	0.181916	1.0681	0.235481	0.129622	1.9625	0.0986243	0.0416625	-0.13877	0.870567	0.804549	0	1	1	0.9347	0.269997	0.171789
67373	2210010C04Rik	0	0	0	0.215112	0	1	1	0	1	1	-1.77097	0.222105	0.122215	0	1	1	0	1	1	0	1	1
70134	2210011C24Rik	0	0	0	0	0	1	1	0	1	1	0	1	1	0	1	1	0	1	1	0	1	1
70153	2210016F16Rik	0.653845	0.652376	1.13863	1.26895	-0.153013	0.832314	0.7539	-0.940895	0.0427446	0.0138556	-1.17731	0.019115	0.00497824	-0.792807	0.0567545	0.0220925	-1.02566	0.0149619	0.00578875	-0.232813	0.383588	0.270263
72357	2210016L21Rik	15.7175	16.9262	22.1776	14.3602	-0.0166473	0.970137	0.94967	-0.482303	0.09292	0.0382392	0.269359	0.44497	0.310985	-0.469516	0.0399473	0.0142828	0.291582	0.269944	0.196531	0.759064	0.00472064	0.00100879
73644	2210039B01Rik	0	0	0	0	0	1	1	0	1	1	0	1	1	0	1	1	0	1	1	0	1	1
76710	2210406O10Rik	0.110959	0	0.21459	0.214661	0	1	1	-0.890904	0.402047	0.265724	0	1	1	-0.639861	0.414093	0.283175	0	1	1	0.428603	0.531334	0.415552
78354	2210407C18Rik	0	0	0	0	0	1	1	0	1	1	0	1	1	0	1	1	0	1	1	0	1	1
73652	2210408F21Rik	2.30905	4.16485	2.33239	2.09632	-1.24028	0.0947981	0.0403253	-0.392929	0.56003	0.422285	-0.22017	0.786587	0.696163	0.851641	0.0187259	0.00555997	1.01596	0.0126162	0.00470975	0.172178	0.641799	0.534733
72371	2210408I21Rik	1.88764	1.98448	2.46365	3.08705	0.120675	0.826753	0.747607	-0.198714	0.588009	0.452474	-0.51135	0.163378	0.0816064	-0.318591	0.189227	0.100908	-0.63156	0.0125203	0.00466285	-0.316382	0.0373237	0.0141885
70157	2210409D07Rik	0	0	0	0	0	1	1	0	1	1	0	1	1	0	1	1	0	1	1	0	1	1
72381	2210409E12Rik	0	0	0	0	0	1	1	0	1	1	0	1	1	0	1	1	0	1	1	0	1	1
70143	2210414B05Rik	0	0	0	0	0	1	1	0	1	1	0	1	1	0	1	1	0	1	1	0	1	1
70393	2210416O15Rik	0	0	0.016854	0.176725	0	1	1	0	1	1	0	1	1	0	1	1	0	1	1	0	1	1
70138	2210417A02Rik	0	0	0	0	0	1	1	0	1	1	0	1	1	0	1	1	0	1	1	0	1	1
76961	2210420H20Rik	0	0	0	0	0	1	1	0	1	1	0	1	1	0	1	1	0	1	1	0	1	1
69542	2300002M23Rik	0	0	0	0	0	1	1	0	1	1	0	1	1	0	1	1	0	1	1	0	1	1
100502865	2300003K06Rik	0	0	0	0	0	1	1	0	1	1	0	1	1	0	1	1	0	1	1	0	1	1
69478	2300009A05Rik	1.53863	1.65976	1.24287	1.32006	-0.83273	0.410041	0.279032	0.182228	0.832662	0.756259	0.123765	0.904956	0.857934	1.01333	0.183335	0.0969008	0.949022	0.264026	0.191321	-0.0488283	0.950902	0.928114
76432	2310001H17Rik	0	0	0.0715035	0	0	1	1	0	1	1	0	1	1	0	1	1	0	1	1	0	1	1
69517	2310001K24Rik	0	0	0	0	0	1	1	0	1	1	0	1	1	0	1	1	0	1	1	0	1	1
69522	2310002D06Rik	0.296665	0.120694	0.442499	0.635153	0	1	1	0	1	1	0	1	1	0	1	1	0	1	1	0	1	1
100504720	2310002F09Rik	0	0	0.00607621	0.0144736	0	1	1	0	1	1	0	1	1	0	1	1	0	1	1	0	1	1
71886	2310002L09Rik	0	0	0	0	0	1	1	0	1	1	0	1	1	0	1	1	0	1	1	0	1	1
74248	2310003L06Rik	0	0	0	0	0	1	1	0	1	1	0	1	1	0	1	1	0	1	1	0	1	1
71873	2310003N18Rik	0	0	0	0	0	1	1	0	1	1	0	1	1	0	1	1	0	1	1	0	1	1
100504268	2310005A03Rik	0	0	0	0	0	1	1	0	1	1	0	1	1	0	1	1	0	1	1	0	1	1
70090	2310005E17Rik	0	0	0	0	0	1	1	0	1	1	0	1	1	0	1	1	0	1	1	0	1	1
71874	2310007B03Rik	0	0	0.0279343	0	0	1	1	0	1	1	0	1	1	0	1	1	0	1	1	0	1	1
72316	2310008N11Rik	0	0	0	0	0	1	1	0	1	1	0	1	1	0	1	1	0	1	1	0	1	1
66364	2310009A05Rik	2.53677	3.39513	2.48075	1.89267	-1.10564	0.232405	0.129219	-0.234995	0.799668	0.713374	-0.0081329	0.994924	0.990972	0.907996	0.0633155	0.0252703	1.10309	0.0273171	0.0122425	0.199833	0.714751	0.619239
69549	2310009B15Rik	1.73381	4.47502	2.90682	2.89397	-1.02204	0.159127	0.0787023	-0.192138	0.768278	0.67172	-0.0458791	0.955143	0.929002	0.834897	0.0771631	0.0323228	0.977833	0.0560409	0.0293486	0.141331	0.750567	0.663142
78329	2310010J17Rik	0.421175	0	0.13105	0.226279	0	1	1	0	1	1	0	1	1	0	1	1	0	1	1	0	1	1
66374	2310011J03Rik	1.51903	1.12654	1.43634	0.946336	0.41053	0.558575	0.427085	0.0798646	0.880411	0.819917	0.606214	0.306314	0.18781	-0.332026	0.490167	0.35626	0.201551	0.712486	0.643485	0.526379	0.182743	0.104455
69625	2310014F06Rik	0.243075	0	0.0412813	0.209275	2.40015	0.0878153	0.0365438	2.25861	0.033717	0.0101932	0.294126	0.798654	0.711078	0	1	1	-2.11268	0.026096	0.0115794	-1.92921	0.0181213	0.0056982
69548	2310015A10Rik	0.600419	0.602804	0.475985	1.20372	-0.505895	0.565668	0.434496	0.126228	0.872484	0.807867	-1.40081	0.0359878	0.011306	0.63322	0.113273	0.0522359	-0.901952	0.0157829	0.00618057	-1.52367	0.000129189	1.03118e-05
69561	2310015A16Rik	0	0	0	0	0	1	1	0	1	1	0	1	1	0	1	1	0	1	1	0	1	1
70100	2310015D24Rik	0	0	0	0	0	1	1	0	1	1	0	1	1	0	1	1	0	1	1	0	1	1
69565	2310015K22Rik	0	0	0	0	0	1	1	0	1	1	0	1	1	0	1	1	0	1	1	0	1	1
69566	2310016D03Rik	0	0	0	0	0	1	1	0	1	1	0	1	1	0	1	1	0	1	1	0	1	1
76443	2310016D23Rik	0	0	0	0	0	1	1	0	1	1	0	1	1	0	1	1	0	1	1	0	1	1
69578	2310016G11Rik	0	0	0	0	0	1	1	0	1	1	0	1	1	0	1	1	0	1	1	0	1	1
69603	2310020H05Rik	0	0	0	0	0	1	1	0	1	1	0	1	1	0	1	1	0	1	1	0	1	1
66367	2310022A10Rik	1.59289	3.20547	2.069	1.46298	-0.836219	0.0567093	0.0209899	-0.243314	0.46122	0.320836	0.170674	0.687387	0.571305	0.591958	0.0374568	0.0131837	1.00756	0.00590907	0.00182244	0.413766	0.0724536	0.0326891
69551	2310022B05Rik	1.46066	1.13029	0.690157	1.51605	0.736915	0.344453	0.219158	1.45784	0.0128686	0.00296777	0.226426	0.711479	0.600484	0.724818	0.0555094	0.0215096	-0.509907	0.178959	0.119718	-1.22434	0.000692196	8.64549e-05
69593	2310026I22Rik	0	0	0	0.044518	0	1	1	0	1	1	0	1	1	0	1	1	0	1	1	0	1	1
75584	2310030A07Rik	0	0	0	0	0	1	1	0	1	1	0	1	1	0	1	1	0	1	1	0	1	1
66952	2310030G06Rik	0.118272	0.651275	1.12897	0.561761	0	1	1	-2.80051	0.00165724	0.000229522	-1.72635	0.103364	0.0443489	-1.23082	0.0581991	0.0227842	-0.193093	0.829525	0.780462	1.06276	0.0549313	0.0230828
67862	2310033P09Rik	4.7675	3.10057	3.8062	3.23088	0.469742	0.299693	0.181836	0.171405	0.60219	0.468022	0.478262	0.193269	0.101839	-0.299064	0.397335	0.268352	0.00659158	0.987338	0.982108	0.309664	0.238665	0.146696
117172	2310034C09Rik	0	0	0	0	0	1	1	0	1	1	0	1	1	0	1	1	0	1	1	0	1	1
75579	2310034G01Rik	0.0476036	0.310191	0.165546	0.10109	0	1	1	0	1	1	0	1	1	0	1	1	0	1	1	0	1	1
69571	2310034O05Rik	0	0	0	0	0	1	1	0	1	1	0	1	1	0	1	1	0	1	1	0	1	1
69579	2310034P14Rik	0.0403173	0	0.09787	0.153218	0	1	1	0	1	1	0	1	1	0	1	1	0	1	1	0	1	1
227446	2310035C23Rik	13.2182	10.7192	13.3826	17.9289	0.35547	0.123607	0.0568485	0.037527	0.885346	0.82665	-0.307844	0.269561	0.157847	-0.321636	0.0929264	0.0408323	-0.666158	0.0108823	0.00390343	-0.347469	0.163417	0.0906184
67101	2310039H08Rik	0.0649875	1.13066	0.268175	0.552773	0	1	1	0	1	1	0	1	1	2.39567	0.000889706	0.000133892	1.55307	0.047661	0.0241332	0	1	1
69629	2310039L15Rik	0	0	0	0	0	1	1	0	1	1	0	1	1	0	1	1	0	1	1	0	1	1
381792	2310040G24Rik	0	0.736698	0.272462	0	0	1	1	0	1	1	0	1	1	0	1	1	0	1	1	0	1	1
75589	2310043L19Rik	0	0	0	0	0	1	1	0	1	1	0	1	1	0	1	1	0	1	1	0	1	1
102633000	2310043M15Rik	0.100459	0.543247	0.234765	0.877845	0	1	1	0	1	1	-1.93435	0.161878	0.0805102	0	1	1	-0.461935	0.614426	0.537214	-2.44799	0.0176267	0.00548591
69679	2310043O21Rik	0	0	0	0	0	1	1	0	1	1	0	1	1	0	1	1	0	1	1	0	1	1
76968	2310046K23Rik	0	0	0	0	0	1	1	0	1	1	0	1	1	0	1	1	0	1	1	0	1	1
69657	2310047D07Rik	0	0	0.060562	0.102968	0	1	1	0	1	1	0	1	1	0	1	1	0	1	1	0	1	1
66533	2310050C09Rik	0	0	0	0	0	1	1	0	1	1	0	1	1	0	1	1	0	1	1	0	1	1
67719	2310057J18Rik	0	0	0	0	0	1	1	0	1	1	0	1	1	0	1	1	0	1	1	0	1	1
68277	2310057M21Rik	2.83768	2.65557	3.51612	3.25639	0.0203018	0.96171	0.937513	-0.307433	0.241223	0.133589	-0.224967	0.465514	0.331508	-0.32348	0.109501	0.0501154	-0.248766	0.255732	0.184116	0.0749305	0.701167	0.603171
69696	2310057N15Rik	0	0	0	0	0	1	1	0	1	1	0	1	1	0	1	1	0	1	1	0	1	1
75694	2310058D17Rik	0.460346	0.528895	0.600762	0.807501	-0.264198	0.729658	0.627354	-0.318684	0.618548	0.485586	-0.649702	0.317337	0.19731	-0.0428584	0.943465	0.910706	-0.384315	0.440896	0.356969	-0.334584	0.451078	0.334716
69662	2310061I04Rik	3.28022	6.48425	4.59195	5.06412	-0.805309	0.0669249	0.0259128	-0.306238	0.399519	0.263378	-0.346662	0.41578	0.284213	0.501503	0.0129054	0.00350526	0.456411	0.0722299	0.0399627	-0.0410928	0.863416	0.805127
69661	2310061N02Rik	0	0	0	0	0	1	1	0	1	1	0	1	1	0	1	1	0	1	1	0	1	1
74184	2310065F04Rik	0	0	0	0	0	1	1	0	1	1	0	1	1	0	1	1	0	1	1	0	1	1
76455	2310067E19Rik	3.62253	0.345472	0.0528677	3.52587	3.51072	0.0102882	0.00245875	5.81136	9.0805e-05	6.22345e-06	0.136254	0.865208	0.800815	2.30833	0.000439115	5.6958e-05	-3.38298	0.00474282	0.00138832	-5.68731	9.81474e-05	7.23844e-06
70281	2310068J16Rik	0.781699	0.920963	0.821505	0.613333	-0.291445	0.685483	0.574252	-0.0246831	0.970125	0.953007	0.303742	0.676808	0.557989	0.28382	0.584772	0.456214	0	1	1	0.325198	0.502697	0.386681
69652	2310069B03Rik	0	0	0	0	0	1	1	0	1	1	0	1	1	0	1	1	0	1	1	0	1	1
69659	2310069G16Rik	1.93696	4.03909	2.43742	3.14613	-1.03312	0.0466832	0.0163409	-0.427192	0.292509	0.17313	-0.695026	0.200022	0.106481	0.605308	0.0811899	0.0344247	0.337428	0.479188	0.395309	-0.266277	0.465609	0.348032
70194	2310075C17Rik	4.01177	0	0.816748	4.36984	5.3574	0.00197993	0.000329056	2.90139	0.000414785	4.11139e-05	0.12826	0.844327	0.770905	-2.44522	0.00663238	0.00155539	-5.23875	7.82554e-05	8.40169e-06	-2.79172	7.87199e-05	5.42917e-06
100125933	2310075K07Rik	0.19714	0.529643	0.415597	0.108186	0	1	1	-0.691968	0.513674	0.372877	0	1	1	0.486823	0.474019	0.339925	0	1	1	1.3375	0.105177	0.0519338
69699	2310079G19Rik	0	0	0	0	0	1	1	0	1	1	0	1	1	0	1	1	0	1	1	0	1	1
69211	2310081J21Rik	0	0	0	0	0	1	1	0	1	1	0	1	1	0	1	1	0	1	1	0	1	1
78648	2400006E01Rik	0	0	0	0	0	1	1	0	1	1	0	1	1	0	1	1	0	1	1	0	1	1
668661	2410002F23Rik	1.38934	1.09182	1.8822	3.79728	0.288343	0.546384	0.414457	-0.278028	0.447233	0.308262	-1.22632	0.00358232	0.000594721	-0.564513	0.123367	0.05834	-1.51773	0.000858143	0.000162169	-0.952929	0.00391973	0.000795646
102633190	2410003I16Rik	0	0	0	0	0	1	1	0	1	1	0	1	1	0	1	1	0	1	1	0	1	1
69729	2410003L11Rik	0	0	0	0	0	1	1	0	1	1	0	1	1	0	1	1	0	1	1	0	1	1
66421	2410004B18Rik	7.74607	11.2479	9.85289	9.45023	-0.567894	0.0573625	0.0213375	-0.33201	0.326001	0.200209	-0.267487	0.393503	0.263569	0.240063	0.45083	0.316943	0.304099	0.208456	0.143622	0.0544083	0.875146	0.820846
69739	2410004I01Rik	0	0	0.142215	0	0	1	1	0	1	1	0	1	1	0	1	1	0	1	1	0	1	1
73667	2410004P03Rik	0.177438	5.13075	0.231122	0.243263	-3.65403	0.0102882	0.00245863	0.120221	0.936976	0.900506	-0.0303239	0.987166	0.978297	3.81152	3.16341e-05	2.40723e-06	3.65881	0.000862759	0.000163277	-0.18362	0.825387	0.754037
69221	2410006H16Rik	5.65959	6.45664	9.33157	9.87975	0.112719	0.876004	0.813807	-0.484315	0.224432	0.121942	-0.701898	0.125188	0.0572811	-0.597065	0.141812	0.0697301	-0.819716	0.0698283	0.0383479	-0.216548	0.414151	0.299746
73648	2410012E07Rik	0	0	0	0	0	1	1	0	1	1	0	1	1	0	1	1	0	1	1	0	1	1
224904	2410015M20Rik	5.19746	10.5461	7.27877	4.53408	-1.17014	0.00596555	0.00125751	-0.350864	0.364052	0.23168	0.497268	0.256062	0.147149	0.820649	0.0238704	0.00751769	1.66841	0.000411565	6.32161e-05	0.848501	0.0304442	0.0109945
675325	2410017I17Rik	0	0	0	0	0	1	1	0	1	1	0	1	1	0	1	1	0	1	1	0	1	1
69732	2410018L13Rik	0	0	0.0110296	0	0	1	1	0	1	1	0	1	1	0	1	1	0	1	1	0	1	1
69750	2410021H03Rik	0.410628	0.338714	0.731304	1.27141	0	1	1	-1.43297	0.169549	0.0840291	-2.39744	0.0522042	0.0182771	-0.543432	0.451013	0.317124	-1.50677	0.0977732	0.0577077	-0.952262	0.140862	0.0749389
100503842	2410022M11Rik	0.705282	0.996093	0.84043	0.98017	-0.484562	0.634944	0.514669	-0.10864	0.899854	0.84709	-0.439488	0.606474	0.477859	0.40158	0.435831	0.302837	0.0487351	0.928813	0.9061	-0.345664	0.362251	0.251203
102636896	2410080I02Rik	0.164666	0	0.0347313	0.0313981	0	1	1	0	1	1	0	1	1	0	1	1	0	1	1	0	1	1
73692	2410089E03Rik	3.82114	1.42682	3.33135	5.91024	1.56641	0.0162696	0.00433461	0.265847	0.548304	0.409726	-0.605385	0.243514	0.137896	-1.30925	2.36057e-06	9.62362e-08	-2.1736	5.3779e-05	5.32574e-06	-0.876493	0.00743066	0.00179267
76785	2410124H12Rik	0	0	0	0	0	1	1	0	1	1	0	1	1	0	1	1	0	1	1	0	1	1
76792	2410131K14Rik	0.677206	1.29728	1.27468	1.4505	-1.3725	0.0761188	0.0305115	-0.981212	0.126998	0.0575577	-1.14922	0.117077	0.0522927	0.375929	0.388722	0.260413	0.214642	0.664394	0.590658	-0.154743	0.721147	0.626923
76797	2410137M14Rik	0	0	0	0	0	1	1	0	1	1	0	1	1	0	1	1	0	1	1	0	1	1
76803	2410141K09Rik	0	0	0	0	0	1	1	0	1	1	0	1	1	0	1	1	0	1	1	0	1	1
78353	2500002B13Rik	0	0.218237	0.0746814	0	0	1	1	0	1	1	0	1	1	0	1	1	0	1	1	0	1	1
72326	2500004C02Rik	1.5283	1.15861	1.65194	1.80418	0.103441	0.896374	0.841557	-0.157666	0.758535	0.658083	-0.366257	0.542814	0.407812	-0.2594	0.472512	0.338504	-0.469904	0.297181	0.220683	-0.205286	0.531334	0.415529
72307	2510002D24Rik	1.99365	1.01731	1.89503	2.7036	0.6159	0.437216	0.305662	-0.00466082	0.993318	0.98969	-0.475622	0.345036	0.220733	-0.616351	0.13993	0.0685077	-1.09396	0.00802177	0.00266698	-0.4722	0.036214	0.0136411
72190	2510009E07Rik	4.35162	3.25193	9.2628	25.8557	0.290352	0.41426	0.28339	-1.07951	7.36242e-05	4.81347e-06	-2.50729	1.49459e-08	9.45292e-11	-1.37178	1.63429e-05	1.05511e-06	-2.7974	1.97842e-08	2.76605e-10	-1.42184	1.3829e-07	1.85826e-09
77034	2510039O18Rik	1.89584	2.14535	2.03273	1.77467	-0.258069	0.64072	0.521029	-0.216992	0.596576	0.462169	0.0180233	0.97364	0.957247	0.0418813	0.896499	0.841676	0.274451	0.309757	0.231757	0.240313	0.26406	0.167145
102635707	2600014E21Rik	0.0552554	0	0.00654202	0.0207047	0	1	1	0	1	1	0	1	1	0	1	1	0	1	1	0	1	1
66520	2610001J05Rik	6.1207	5.65926	7.20278	15.4561	0.0873853	0.882378	0.822284	-0.277481	0.534526	0.394476	-1.38371	0.00268652	0.000416751	-0.360625	0.356357	0.231911	-1.4706	0.000420209	6.48579e-05	-1.1186	0.00203571	0.000348675
67028	2610002M06Rik	9.75554	12.7608	21.9177	21.4778	-0.391067	0.0303788	0.00952311	-1.17576	1.38764e-05	5.97083e-07	-1.11248	2.78552e-05	1.53521e-06	-0.784292	0.000128928	1.29461e-05	-0.721112	0.000345588	5.08871e-05	0.0637534	0.761561	0.6771
381598	2610005L07Rik	0.0943789	0.0456766	0.0460702	0.0937998	0	1	1	0	1	1	0	1	1	0	1	1	0	1	1	0	1	1
72128	2610008E11Rik	5.18662	2.86393	3.94359	6.02409	0.8954	0.0195863	0.00546666	0.412204	0.109544	0.0473589	-0.240282	0.465681	0.331744	-0.478556	0.0318485	0.0107588	-1.14437	0.00109111	0.000220948	-0.655576	0.00705911	0.00167969
100503074	2610016A17Rik	0	0	0	0	0	1	1	0	1	1	0	1	1	0	1	1	0	1	1	0	1	1
69918	2610020C07Rik	3.63187	2.75549	4.17873	3.95216	-0.0967067	0.884191	0.824705	-0.430455	0.338132	0.210098	-0.487294	0.29342	0.177408	-0.329973	0.357838	0.233333	-0.390134	0.190366	0.128804	-0.0672855	0.831287	0.762221
69916	2610020F03Rik	0.453015	0.633948	0.71606	0.816273	0	1	1	-0.665227	0.385723	0.251059	0	1	1	0.41324	0.567271	0.437323	0	1	1	-0.0824332	0.900544	0.858474
668572	2610021A01Rik	5.19279	2.67081	3.77851	4.74763	0.665478	0.0506855	0.0181821	0.442674	0.0654248	0.0241576	0.152283	0.594844	0.465169	-0.219199	0.462179	0.328405	-0.509845	0.0900881	0.0522489	-0.300378	0.179396	0.102212
69904	2610027F03Rik	0	0	0	0	0	1	1	0	1	1	0	1	1	0	1	1	0	1	1	0	1	1
69909	2610027K06Rik	0.861818	0.543864	0.445633	0.543849	0.635444	0.390269	0.260224	0.937144	0.0891748	0.0363114	0.667977	0.259947	0.150212	0.311453	0.575088	0.44598	0.039717	0.93958	0.920294	-0.277412	0.517724	0.401798
72395	2610028E06Rik	0	0	0.229788	0	0	1	1	-3.74067	0.000586913	6.30445e-05	0	1	1	-2.26896	0.00643984	0.0015018	0	1	1	3.85346	0.000317349	3.19333e-05
76964	2610028H24Rik	0.229631	0.287519	0.146174	0.0848659	-0.955982	0.43208	0.300374	0.142659	0.914729	0.867611	1.1213	0.438533	0.304786	1.04799	0.209758	0.115458	0	1	1	1.02202	0.355208	0.24446
72386	2610035D17Rik	1.9282	2.54774	2.22598	1.99242	-0.734107	0.236291	0.13214	-0.541671	0.198202	0.10293	-0.320936	0.492278	0.357335	0.185167	0.70291	0.591005	0.41958	0.335254	0.255299	0.216681	0.445921	0.329327
69248	2610035F20Rik	0	0	0	0	0	1	1	0	1	1	0	1	1	0	1	1	0	1	1	0	1	1
70190	2610036A22Rik	0	0	0.0892886	0.565749	0	1	1	0	1	1	0	1	1	0	1	1	0	1	1	0	1	1
70040	2610037D02Rik	0	0	0.040788	0.040203	0	1	1	0	1	1	0	1	1	0	1	1	0	1	1	0	1	1
554327	2610042L04Rik	0	0	0.0344085	0	0	1	1	0	1	1	0	1	1	0	1	1	0	1	1	0	1	1
72139	2610044O15Rik8	2.14196	2.78898	3.81259	4.12704	-0.0176768	0.974963	0.957489	-0.696913	0.030326	0.00890142	-0.868077	0.0118081	0.00268731	-0.67812	0.0454801	0.016815	-0.85302	0.0120229	0.00443408	-0.166886	0.453057	0.336461
72481	2610203C22Rik	0.0898535	0.273911	0.214427	0.299475	0	1	1	0	1	1	0	1	1	0	1	1	0	1	1	0	1	1
72495	2610206C17Rik	0.0179738	0	0.0138321	0	0	1	1	0	1	1	0	1	1	0	1	1	0	1	1	0	1	1
72484	2610300M13Rik	0	0	0	0	0	1	1	0	1	1	0	1	1	0	1	1	0	1	1	0	1	1
67157	2610301B20Rik	5.25746	5.01042	5.09443	4.09656	0.124121	0.700682	0.591042	0.100551	0.686674	0.565575	0.537282	0.0483757	0.0165584	-0.0207396	0.943465	0.910684	0.419276	0.0966757	0.0569807	0.432746	0.0360245	0.0135519
67170	2610306M01Rik	1.05782	1.06092	1.24731	1.39654	0.794887	0.449949	0.318246	-0.117093	0.861521	0.793621	-0.226126	0.768317	0.67256	-0.871051	0.219873	0.122784	-1.01466	0.195371	0.132832	-0.117083	0.798957	0.721332
72518	2610307P16Rik	0	0.0501823	0.0158724	0.0136537	0	1	1	0	1	1	0	1	1	0	1	1	0	1	1	0	1	1
72511	2610316D01Rik	1.12168	3.19691	5.48313	12.8453	-1.7401	0.064925	0.0249415	-2.30485	0.00479585	0.000866413	-3.56272	0.000216778	1.93843e-05	-0.583014	0.120678	0.056733	-1.82443	0.000272345	3.82421e-05	-1.25235	0.000252291	2.37309e-05
102632156	2610318M16Rik	0	0	0	0	0	1	1	0	1	1	0	1	1	0	1	1	0	1	1	0	1	1
70458	2610318N02Rik	0	0.142775	0.0601295	0	0	1	1	0	1	1	0	1	1	0	1	1	0	1	1	0	1	1
72503	2610507B11Rik	16.7926	19.1686	10.5936	10.6996	-0.27042	0.106866	0.047131	0.658668	0.00101936	0.000125666	0.61862	0.00109895	0.000138183	0.923237	6.49504e-06	3.32904e-07	0.885761	6.88557e-06	4.17189e-07	-0.0379684	0.825846	0.754894
72203	2610507I01Rik	1.12865	3.15385	1.67326	1.47537	-1.18791	0.0127741	0.00321488	-0.366494	0.330265	0.203614	-0.206721	0.647779	0.524089	0.821182	0.00703764	0.00166915	0.989433	0.00483505	0.00142225	0.153135	0.551726	0.437069
330173	2610524H06Rik	1.7853	1.40646	1.85013	2.40556	-0.454936	0.631627	0.510544	-0.838434	0.209617	0.110869	-1.10984	0.133341	0.0621297	-0.39621	0.420584	0.288788	-0.661098	0.183874	0.123671	-0.266537	0.479472	0.362135
70045	2610528A11Rik	0	0	0.0256082	0	0	1	1	0	1	1	0	1	1	0	1	1	0	1	1	0	1	1
66451	2610528J11Rik	0	0	0	0	0	1	1	0	1	1	0	1	1	0	1	1	0	1	1	0	1	1
102638195	2700003A03Rik	0.0207113	0	0.0169418	0	0	1	1	0	1	1	0	1	1	0	1	1	0	1	1	0	1	1
67194	2700038G22Rik	0.186171	0.0895077	0.136909	0.166418	0	1	1	0	1	1	0	1	1	0	1	1	0	1	1	0	1	1
78449	2700046A07Rik	0	0	0	0.0531704	0	1	1	0	1	1	0	1	1	0	1	1	0	1	1	0	1	1
67188	2700046G09Rik	0.805796	1.1098	0.716043	1.29577	0.075664	0.93881	0.903605	0.222104	0.719124	0.607303	-0.755541	0.183559	0.0950438	0.164001	0.796228	0.707489	-0.838648	0.11885	0.0730375	-0.976931	0.00567772	0.00127458
76967	2700049A03Rik	1.32692	0.924307	1.15071	1.17659	0.384034	0.499229	0.366326	0.302101	0.41558	0.278597	0.0291856	0.957649	0.932829	-0.0763195	0.81268	0.726951	-0.356741	0.361876	0.279773	-0.280865	0.30838	0.20383
72578	2700054A10Rik	0.186788	0.338955	0.395332	0.498325	-1.25715	0.181855	0.0935287	-1.2435	0.0671858	0.0250491	-1.57956	0.0326586	0.00992855	-0.0203237	0.975426	0.959891	-0.329133	0.535617	0.452908	-0.321875	0.307597	0.203274
68046	2700062C07Rik	4.79841	3.05273	3.80459	3.9801	0.167677	0.800912	0.716289	0.18502	0.646959	0.516662	0.147171	0.755776	0.656883	0.013256	0.97819	0.964085	-0.0191985	0.96632	0.954639	-0.0409528	0.879317	0.826202
72563	2700068H02Rik	0	0	0	0	0	1	1	0	1	1	0	1	1	0	1	1	0	1	1	0	1	1
72608	2700069I18Rik	0.0394642	0	0.085976	0	0	1	1	0	1	1	0	1	1	0	1	1	0	1	1	0	1	1
72609	2700070H01Rik	0	0	0	0	0	1	1	0	1	1	0	1	1	0	1	1	0	1	1	0	1	1
108899	2700081O15Rik	4.82587	2.24213	2.1836	3.51695	1.07397	0.0131028	0.00331204	1.10943	0.000959229	0.000116281	0.450423	0.129401	0.0597963	0.0304724	0.925883	0.884131	-0.613427	0.0137783	0.00523861	-0.656028	0.00111967	0.00016238
72647	2700089I24Rik	0	0	0	0	0	1	1	0	1	1	0	1	1	0	1	1	0	1	1	0	1	1
72658	2700097O09Rik	0.688471	1.96061	1.31907	1.85552	-1.30819	0.0727863	0.0287643	-1.03077	0.0808529	0.0320518	-1.59275	0.0214928	0.00577369	0.276607	0.474481	0.340475	-0.293947	0.505146	0.421415	-0.557665	0.0815817	0.0379896
77022	2700099C18Rik	0.943537	0.58345	0.474787	0.751769	0.927564	0.35607	0.229688	1.36205	0.0692734	0.0260301	0.438136	0.565191	0.433752	0.41448	0.547808	0.416574	-0.501036	0.35332	0.272193	-0.932166	0.0534419	0.0223179
66456	2810001G20Rik	2.89384	3.71085	3.94118	3.78874	-0.320575	0.567389	0.436131	-0.372316	0.388044	0.253243	-0.375066	0.47317	0.338735	-0.0603234	0.913078	0.864542	-0.0495625	0.929444	0.906909	0.0020693	0.995875	0.994765
66457	2810002D19Rik	2.09981	1.4717	1.25561	3.66528	0.490333	0.419886	0.288954	0.713978	0.0663931	0.0246384	-0.757286	0.0435299	0.0144606	0.234513	0.633437	0.509921	-1.25812	0.00752545	0.00246445	-1.47147	1.67456e-05	7.88079e-07
66523	2810004N23Rik	4.15887	3.21076	4.07152	3.23426	0.0182415	0.981146	0.968778	-0.29533	0.51644	0.37566	0.0817857	0.895035	0.842037	-0.311351	0.287102	0.173801	0.0612838	0.873843	0.836721	0.376573	0.168129	0.0940957
72650	2810006K23Rik	1.85097	1.62176	1.43214	1.53702	-0.567023	0.536446	0.403915	-0.28726	0.690005	0.569835	-0.215572	0.802674	0.716323	0.280305	0.380897	0.253474	0.352987	0.331494	0.251892	0.0707354	0.812521	0.738056
100503178	2810013P06Rik	2.64067	2.68063	3.50709	4.60475	0.157748	0.758963	0.663929	-0.29021	0.379405	0.24538	-0.76372	0.0293562	0.0086284	-0.448375	0.160119	0.0813379	-0.921232	0.00629397	0.00197175	-0.472332	0.0249781	0.00853794
69944	2810021J22Rik	0.993317	1.1662	1.3842	1.39408	-0.256185	0.58747	0.45833	-0.532455	0.0934878	0.0385435	-0.570769	0.106024	0.045985	-0.275276	0.315445	0.19652	-0.316901	0.239129	0.169703	-0.0404643	0.842751	0.777618
69953	2810025M15Rik	3.56545	4.69581	2.11983	3.5943	-0.512499	0.435277	0.303826	0.765762	0.161117	0.0785062	-0.0313247	0.96825	0.948712	1.27854	0.000229396	2.59963e-05	0.49074	0.23499	0.166204	-0.794024	0.0362473	0.0136649
100504687	2810029C07Rik	1.82938	1.07727	0.63199	0.562412	0.607983	0.446321	0.314643	1.20041	0.0305058	0.00898441	1.39685	0.0473364	0.0160922	0.59496	0.203104	0.110664	0.793264	0.140728	0.0896347	0.200399	0.626859	0.517162
78335	2810030D12Rik	0	0	0	0	0	1	1	0	1	1	0	1	1	0	1	1	0	1	1	0	1	1
72669	2810032G03Rik	1.48334	1.07775	1.585	1.41846	0.272648	0.884574	0.82562	-0.662485	0.530581	0.390577	-0.615257	0.604603	0.475699	-0.934069	0.180538	0.0949608	-0.889273	0.197027	0.134294	0.0557149	0.892471	0.846215
72665	2810039B14Rik	0	0	0.259585	0.218104	0	1	1	0	1	1	0	1	1	0	1	1	0	1	1	0	1	1
72716	2810047C21Rik1	0	0	0	0	0	1	1	0	1	1	0	1	1	0	1	1	0	1	1	0	1	1
102631679	2810048H02Rik	0	0	0	0	0	1	1	0	1	1	0	1	1	0	1	1	0	1	1	0	1	1
72677	2810049E08Rik	0.274482	0.581186	0.897396	5.20395	0	1	1	-1.56705	0.124118	0.0558033	-3.7388	0.00855453	0.00178611	-0.0573345	0.937017	0.900937	-2.18694	0.0484649	0.024623	-2.1455	0.00575176	0.00129538
74200	2810403A07Rik	4.81149	4.25543	6.01602	11.0791	0.325567	0.442445	0.310843	-0.155507	0.631039	0.49941	-0.926063	0.0404093	0.0131258	-0.47497	0.013785	0.00382368	-1.25428	0.00433052	0.00124485	-0.775608	0.0187215	0.00594719
69964	2810403D21Rik	0.0991694	0.121199	0.134574	0.255948	0	1	1	0	1	1	0	1	1	0	1	1	0	1	1	0	1	1
69966	2810404M03Rik	0	0	0.0124648	0	0	1	1	0	1	1	0	1	1	0	1	1	0	1	1	0	1	1
69974	2810405F15Rik	0	0	0.0873122	0	0	1	1	0	1	1	0	1	1	0	1	1	0	1	1	0	1	1
100039901	2810407A14Rik	0	0	0	0	0	1	1	0	1	1	0	1	1	0	1	1	0	1	1	0	1	1
70419	2810408A11Rik	0	0.0374543	0.0106532	0.0166301	0	1	1	0	1	1	0	1	1	0	1	1	0	1	1	0	1	1
69941	2810408I11Rik	0.0973713	0	0.14626	0.134546	0	1	1	0	1	1	0	1	1	0	1	1	0	1	1	0	1	1
100042332	2810410L24Rik	0.0893754	0	0.129786	0.280994	0	1	1	0	1	1	0	1	1	0	1	1	0	1	1	0	1	1
102640772	2810414N06Rik	0	0	0.0268142	0	0	1	1	0	1	1	0	1	1	0	1	1	0	1	1	0	1	1
76937	2810429I04Rik	0	0.50132	0.465126	1.94778	0	1	1	-1.48745	0.231739	0.127032	-3.25903	0.0104035	0.00228936	0.260343	0.782073	0.689241	-1.50142	0.0586015	0.0309537	-1.75055	0.0176468	0.00549654
77132	2810433D01Rik	0	0	0	0	0	1	1	0	1	1	0	1	1	0	1	1	0	1	1	0	1	1
72753	2810442N19Rik	0.285414	0.537895	0.352228	1.02041	0	1	1	-0.552359	0.610657	0.477274	-1.76174	0.109363	0.0477851	0	1	1	0	1	1	-1.22947	0.0931687	0.0446026
72813	2810454H06Rik	0.105839	0	0.12873	0.123056	0	1	1	0	1	1	0	1	1	0	1	1	0	1	1	0	1	1
72792	2810459M11Rik	0.199654	0.177007	0.19734	0.103072	0.329208	0.794962	0.708545	0.0863612	0.929633	0.889923	0.945468	0.350245	0.224839	-0.252567	0.764862	0.666907	0	1	1	0.889692	0.168769	0.0945842
72834	2810468N07Rik	1.30959	0.171341	1.06145	1.94862	1.94072	0.0437642	0.0150899	0.125817	0.833325	0.756992	-0.735252	0.183747	0.095199	-1.82102	0.00455488	0.000971461	-2.67983	0.000386043	5.82671e-05	-0.859175	0.0134696	0.00389099
72818	2810471M01Rik	0	0	0	0	0	1	1	0	1	1	0	1	1	0	1	1	0	1	1	0	1	1
67246	2810474O19Rik	3.38223	4.29895	4.25933	5.20732	0.0466389	0.915827	0.869489	-0.237579	0.410909	0.274057	-0.470598	0.127242	0.0584456	-0.28259	0.227693	0.128298	-0.506423	0.042925	0.0212016	-0.243651	0.194013	0.112515
67261	2900005J15Rik	0.618518	0.45117	0.311653	0.703575	0.298144	0.832406	0.754083	0.884612	0.346188	0.216625	0.498683	0.677907	0.559536	0.548129	0.406565	0.276583	0.189777	0.838264	0.790746	-0.342599	0.632802	0.523553
100502745	2900009J06Rik	0.228199	0.13214	0.349293	1.2635	0	1	1	0	1	1	0	1	1	0	1	1	0	1	1	0	1	1
67254	2900011O08Rik	36.8212	53.7029	45.6451	25.9677	-0.726995	0.0324029	0.0103014	-0.533657	0.0674712	0.0251973	0.300833	0.388536	0.259097	0.198726	0.179948	0.0945678	1.0303	8.38059e-05	9.10062e-06	0.835196	0.000185547	1.62464e-05
102634584	2900024J01Rik	0	0	0	0	0	1	1	0	1	1	0	1	1	0	1	1	0	1	1	0	1	1
243219	2900026A02Rik	4.96434	0.866932	1.34906	0.739	2.9655	3.75753e-05	2.53058e-06	1.7016	1.53117e-05	6.77802e-07	2.59886	2.13121e-06	6.10469e-08	-1.26525	0.00266628	0.000505923	-0.355631	0.394742	0.311329	0.906309	0.0013784	0.000210998
72893	2900040C04Rik	0	0	0	0	0	1	1	0	1	1	0	1	1	0	1	1	0	1	1	0	1	1
78403	2900041M22Rik	0.147669	0	0.257658	0.0680152	0	1	1	0	1	1	0	1	1	0	1	1	0	1	1	0	1	1
102640779	2900052L18Rik	0.224875	0.171231	0.201938	0.710526	0.58234	0.434516	0.303056	0.0896001	0.883373	0.823814	-1.77329	0.00173116	0.000245258	-0.476173	0.410333	0.280001	-2.36531	0.000437724	6.85794e-05	-1.85847	7.70035e-05	5.27852e-06
73040	2900052N01Rik	0.346017	0.369654	0.134742	0.115526	1.05932	0.551242	0.419084	1.72937	0.168132	0.0830773	1.81177	0.244628	0.138727	0	1	1	0	1	1	0.0405368	0.962572	0.946061
73001	2900055J20Rik	15.0183	4.35781	8.36231	16.7826	1.60556	0.0107563	0.00260557	0.714255	0.0418417	0.013468	-0.345313	0.337272	0.214081	-0.887378	0.0116155	0.00308944	-1.95297	2.2235e-05	1.81926e-06	-1.06082	5.47078e-05	3.46222e-06
73009	2900057B20Rik	0	0	0	0	0	1	1	0	1	1	0	1	1	0	1	1	0	1	1	0	1	1
68204	2900060B14Rik	0	0	0	0.0621165	0	1	1	0	1	1	0	1	1	0	1	1	0	1	1	0	1	1
102634502	2900060L22Rik	3.21992	0.0183192	0.126474	0.0879593	6.06441	0.0211388	0.00603685	4.90452	0.00035324	3.37013e-05	5.66842	0.00280124	0.000439316	-1.1519	0.133735	0.0647872	0	1	1	0.732489	0.189322	0.109227
102641621	2900060N12Rik	0.572235	0.20234	0.281724	0.43412	0.611307	0.601795	0.475064	0.449873	0.608903	0.475301	0.0113743	0.992991	0.987919	-0.185989	0.802478	0.714641	-0.607111	0.469285	0.385098	-0.428738	0.52768	0.411583
100504421	2900076A07Rik	0.981302	0.0717948	0.641317	1.79513	2.10855	0.0918055	0.0386789	1.00768	0.184859	0.0939863	-0.554582	0.511041	0.375723	-1.09498	0.137315	0.066923	-2.67622	0.00652842	0.00207106	-1.57952	0.00669092	0.00157278
620760	2900079G21Rik	1.60245	0.0202941	0.216364	0.682218	5.03898	7.405e-05	5.83947e-06	2.74996	1.06946e-05	4.25743e-07	0.973447	0.0233826	0.00643824	-2.27524	0.00421646	0.000882149	-4.07209	6.88658e-05	7.20546e-06	-1.78508	0.000404835	4.3394e-05
73090	2900092C05Rik	0	0	0	0	0	1	1	0	1	1	0	1	1	0	1	1	0	1	1	0	1	1
73100	2900092D14Rik	6.493	2.4172	23.227	38.214	2.1103	0.0027601	0.00049347	-1.69502	6.36688e-05	3.99704e-06	-2.45852	3.40467e-06	1.12974e-07	-3.79937	5.447e-07	1.57655e-08	-4.57759	3.69857e-07	1.14933e-08	-0.783425	0.0111734	0.00304503
347740	2900097C17Rik	11.5991	14.5298	12.1937	7.87319	-0.34913	0.250948	0.143404	-0.121906	0.681115	0.557306	0.460369	0.107811	0.0469506	0.22955	0.219532	0.122476	0.818675	0.000187919	2.4231e-05	0.580985	0.00257872	0.000471383
378954	3000002C10Rik	0.161386	0.0958761	0.374127	0.492255	0	1	1	-1.13906	0.229005	0.12515	0	1	1	-0.554192	0.461	0.327309	0	1	1	-0.602451	0.283332	0.182625
75693	3010001F23Rik	0.0989822	0.477449	0.24403	1.19387	0	1	1	0	1	1	-3.07137	0.00766376	0.00155228	0	1	1	-1.44432	0.0691498	0.0379091	-1.87197	0.0016782	0.000272167
109163	3010003L21Rik	0	0	0	0	0	1	1	0	1	1	0	1	1	0	1	1	0	1	1	0	1	1
73076	3100003L05Rik	0	0	0	0	0	1	1	0	1	1	0	1	1	0	1	1	0	1	1	0	1	1
76482	3110002H16Rik	3.87603	6.79247	3.96489	3.9676	-1.10123	0.0109828	0.00268087	-0.339642	0.338372	0.21033	-0.361076	0.36297	0.235891	0.764971	0.0002979	3.54192e-05	0.733236	0.00171792	0.000392698	-0.0252374	0.89817	0.854899
102635122	3110005L24Rik	0.283605	0	0.446503	0.920217	0	1	1	-0.0662756	0.946052	0.914072	-0.966025	0.29973	0.18245	-1.1182	0.133129	0.0643436	-2.03892	0.0280554	0.0126361	-0.902587	0.157347	0.0863662
73103	3110009E18Rik	0.522864	0	0.18016	0.293883	0	1	1	1.03873	0.402245	0.266026	0.0551345	0.971867	0.954646	0	1	1	0	1	1	0	1	1
67280	3110009F21Rik	0	0	0	0	0	1	1	0	1	1	0	1	1	0	1	1	0	1	1	0	1	1
73079	3110009M11Rik	0	0	0	0.0355547	0	1	1	0	1	1	0	1	1	0	1	1	0	1	1	0	1	1
73129	3110015C05Rik	0	0	0	0	0	1	1	0	1	1	0	1	1	0	1	1	0	1	1	0	1	1
67289	3110021A11Rik	0.461299	0	0.203765	0.46292	0	1	1	0	1	1	0	1	1	0	1	1	0	1	1	0	1	1
76982	3110035E14Rik	38.4621	1.21819	4.91735	1.59493	5.23682	1.58019e-07	2.43813e-09	2.95214	7.02977e-08	6.02684e-10	4.36288	1.01437e-08	5.04143e-11	-2.26248	0.000360679	4.46328e-05	-0.874075	0.0705633	0.0388534	1.39339	0.00139771	0.000215252
73144	3110039I08Rik	0.0847831	0.449632	1.24355	0.659679	0	1	1	-2.77533	0.00693507	0.00137929	0	1	1	-1.21926	0.0909256	0.0395777	0	1	1	0.86388	0.0829772	0.0387752
67293	3110039M20Rik	1.64545	1.67511	2.43296	7.00631	-0.0950388	0.922028	0.877856	-0.238063	0.724598	0.61388	-1.56817	0.0253662	0.00713736	-0.156583	0.764313	0.665874	-1.47922	0.016193	0.00638122	-1.3195	0.00427061	0.000884587
73176	3110040M04Rik	0	0	0	0	0	1	1	0	1	1	0	1	1	0	1	1	0	1	1	0	1	1
67290	3110040N11Rik	1.44211	1.05009	1.4084	1.75189	0.655058	0.467537	0.335632	0.314693	0.593837	0.458944	0.00269777	0.997307	0.995295	-0.344612	0.455768	0.321931	-0.653447	0.107496	0.0646282	-0.312315	0.24842	0.154584
73205	3110043O21Rik	2.41124	3.82111	3.36294	3.26979	-0.362133	0.258591	0.1495	-0.376984	0.140486	0.0656333	-0.362528	0.212762	0.115384	-0.0152395	0.95579	0.929789	0.0087399	0.973814	0.964437	0.013763	0.950927	0.928402
67303	3110045C21Rik	0.149825	0.300699	0.123183	0.107258	0	1	1	0	1	1	0	1	1	0	1	1	0	1	1	0	1	1
382686	3110053B16Rik	0.139373	0.215284	0.599306	0.53929	0	1	1	-1.4115	0.103077	0.043774	-1.46624	0.126805	0.0582048	-0.664241	0.44361	0.309832	-0.739275	0.399299	0.315833	-0.0727857	0.916479	0.878905
73204	3110056K07Rik	0.78531	0.691305	0.990704	2.01258	-0.468419	0.603791	0.477549	-0.663432	0.342074	0.213394	-1.53131	0.0473309	0.0160874	-0.202764	0.747334	0.643735	-1.07311	0.098722	0.0583891	-0.859761	0.077166	0.0354269
78412	3110062M04Rik	0.144994	0.219434	0.173322	0.142564	0.0339662	0.976855	0.961502	-0.249725	0.683007	0.559531	0.294523	0.724737	0.618709	-0.27581	0.715833	0.606607	0	1	1	0.551827	0.311069	0.20607
67304	3110070M22Rik	0.171147	0.107983	0.13863	0.164168	0	1	1	0	1	1	0	1	1	0	1	1	0	1	1	0	1	1
73234	3110079O15Rik	0.149349	0	0	0	0	1	1	0	1	1	0	1	1	0	1	1	0	1	1	0	1	1
73212	3110082I17Rik	2.89851	0.662288	1.2125	0.968758	2.04127	0.0107563	0.00260621	1.16898	0.00559864	0.00105165	1.50695	0.00704368	0.00139303	-0.890432	0.0784741	0.0330263	-0.538845	0.333953	0.25418	0.333271	0.345315	0.235919
433868	3110082J24Rik	0	0	0	0	0	1	1	0	1	1	0	1	1	0	1	1	0	1	1	0	1	1
100043232	3110099E03Rik	0	0	0	0	0	1	1	0	1	1	0	1	1	0	1	1	0	1	1	0	1	1
71818	3200001D21Rik	0.342231	0.500167	0.231253	0.470282	-0.888625	0.510921	0.377899	0.110319	0.933546	0.895342	-0.725042	0.586507	0.456209	0.968807	0.0617005	0.0244829	0.145863	0.855491	0.812547	-0.827026	0.211599	0.125683
100503812	3300002A11Rik	0.0127472	0.681751	0.0288133	0.249866	-3.56626	0.00509155	0.00104297	0	1	1	-2.12903	0.0883977	0.036183	0	1	1	0	1	1	0	1	1
69277	3300002I08Rik	0.245631	0.144265	0.403245	0.581909	0	1	1	0	1	1	0	1	1	0	1	1	0	1	1	-0.405679	0.486073	0.36868
70230	3300002P13Rik	10.428	6.15045	5.80925	1.11088	0.508924	0.526467	0.393214	0.626712	0.257074	0.146092	2.87179	0.00596675	0.00112314	0.112223	0.762552	0.663518	2.36912	0.000112082	1.29519e-05	2.24708	0.000137364	1.1143e-05
78512	3300005D01Rik	0	0	0.066003	0	0	1	1	0	1	1	0	1	1	0	1	1	0	1	1	0	1	1
100504518	3425401B19Rik	0	0	0	0	0	1	1	0	1	1	0	1	1	0	1	1	0	1	1	0	1	1
67419	3632451O06Rik	0.977143	4.86124	3.10999	3.53459	-2.48089	0.000109935	9.46496e-06	-1.87653	0.000423984	4.23144e-05	-1.95175	0.000622819	6.92151e-05	0.613171	0.02296	0.00715465	0.52859	0.0700496	0.0384837	-0.0835149	0.743424	0.654622
320606	3632454L22Rik	0.254499	0.0682222	0.73434	1.67419	1.9597	0.0926079	0.0391857	-1.38851	0.0399521	0.0127212	-2.76297	0.00213625	0.00031738	-3.33653	0.00057329	7.86831e-05	-4.72612	0.00103654	0.000206783	-1.36129	0.0134959	0.00390029
70691	3830403N18Rik	0	0	0.0586537	0	0	1	1	0	1	1	0	1	1	0	1	1	0	1	1	0	1	1
218734	3830406C13Rik	1.48281	1.15232	1.47593	2.42241	0.0169741	0.971974	0.95246	-0.134527	0.642597	0.512104	-0.741583	0.0257169	0.00727494	-0.149831	0.531519	0.39768	-0.755354	0.0122502	0.00453799	-0.608927	0.00642113	0.00149079
100040322	3830408C21Rik	1.40192	1.20542	1.05703	2.86615	0.16915	0.894061	0.837564	-0.0808733	0.917461	0.872054	-1.47521	0.0354164	0.0110796	-0.269946	0.641328	0.519269	-1.65031	0.0103351	0.00365702	-1.38664	0.000194958	1.72394e-05
70696	3830417A13Rik	0	0	0	0	0	1	1	0	1	1	0	1	1	0	1	1	0	1	1	0	1	1
320069	3830432H09Rik	0	0	0	0	0	1	1	0	1	1	0	1	1	0	1	1	0	1	1	0	1	1
665306	3930402G23Rik	0	0	0	0	0	1	1	0	1	1	0	1	1	0	1	1	0	1	1	0	1	1
381218	4430402I18Rik	3.04136	3.14409	2.00766	1.57771	-0.131003	0.662754	0.547947	0.623625	0.0135839	0.00317984	0.981144	0.000678784	7.6833e-05	0.753919	0.0040038	0.000829354	1.11357	0.000137243	1.65438e-05	0.36091	0.0817428	0.0380748
433456	4631405J19Rik	0.0651224	0.0572457	0.00487013	0.121909	0	1	1	0	1	1	0	1	1	0	1	1	0	1	1	0	1	1
70800	4631405K08Rik	0	0	0	0	0	1	1	0	1	1	0	1	1	0	1	1	0	1	1	0	1	1
70808	4632415L05Rik	1.47138	2.21773	2.95662	5.77973	-0.632707	0.166211	0.0834094	-1.02503	0.00492249	0.000894471	-1.93681	2.79332e-05	1.5448e-06	-0.391753	0.0640433	0.0256098	-1.30536	8.51326e-06	5.50611e-07	-0.907333	9.057e-06	3.6062e-07
666737	4632427E13Rik	5.0333	1.5432	1.57453	8.73125	1.6502	0.306084	0.186811	1.94296	0.0552218	0.0194104	-0.129504	0.91307	0.869194	0.271617	0.642616	0.520807	-1.78394	0.10004	0.0593118	-2.07697	0.00836639	0.00209717
100043102	4632428C04Rik	0	0.507945	0.0752989	0.0914455	0	1	1	0	1	1	0	1	1	0	1	1	0	1	1	0	1	1
100043309	4732414G09Rik	0.456359	0.0446261	0.169692	0.538332	1.3172	0.185132	0.0957755	1.23934	0.0722608	0.0276391	-0.307729	0.667675	0.546789	-0.127559	0.878295	0.815144	-1.6261	0.0260542	0.0115555	-1.52385	0.00450111	0.000951005
320737	4732416N19Rik	16.1968	11.1718	13.5832	4.40947	0.355538	0.417423	0.286732	0.185119	0.582597	0.44629	1.78894	0.000313557	3.01535e-05	-0.172887	0.680495	0.564019	1.43351	0.00194264	0.000455609	1.6176	0.000283854	2.75962e-05
100042484	4732419C18Rik	0.0169613	0	0.0768944	0.014962	0	1	1	-0.713698	0.646883	0.516561	0	1	1	-0.275457	0.835171	0.755707	0	1	1	0.451349	0.747179	0.658946
654788	4732440D04Rik	0.325954	0.268181	0.399337	0.933295	0.721327	0.544798	0.41287	0.385136	0.640157	0.509537	-0.756843	0.399251	0.268736	-0.331059	0.551724	0.420528	-1.48475	0.0673564	0.0367674	-1.13096	0.0389126	0.0149275
414105	4732465J04Rik	0	0	0	0	0	1	1	0	1	1	0	1	1	0	1	1	0	1	1	0	1	1
654804	4732471J01Rik	0.55536	0.373838	0.480554	0.764966	0.81817	0.397541	0.267402	0.522867	0.403498	0.26735	-0.246288	0.719985	0.611727	-0.307507	0.542958	0.411106	-1.06522	0.0236272	0.010279	-0.769532	0.0287545	0.0102027
319871	4732490B19Rik	0	0	0	0	0	1	1	0	1	1	0	1	1	0	1	1	0	1	1	0	1	1
224523	4732491K20Rik	0.786769	1.0299	0.788984	1.24713	-1.03684	0.134167	0.0631606	-0.584292	0.319151	0.194799	-1.39988	0.0208954	0.00557238	0.446704	0.217595	0.120785	-0.364951	0.251929	0.180662	-0.811631	0.00703951	0.00167346
320798	4831440D22Rik	1.22894	1.93368	1.86452	2.18327	-0.554328	0.316853	0.195327	-0.459978	0.256296	0.145444	-0.821472	0.0901968	0.0371241	0.0923409	0.828067	0.746763	-0.267068	0.549069	0.466962	-0.357363	0.255347	0.159969
320965	4831440E17Rik	1.19921	0.371942	0.443983	0.878774	0.948088	0.344128	0.218719	0.965464	0.142685	0.0668849	0.183219	0.822927	0.741921	0.0117784	0.983455	0.973142	-0.762443	0.160114	0.104716	-0.7858	0.069547	0.0310462
71624	4833411C07Rik	0.279428	0	0	0	0	1	1	0	1	1	0	1	1	0	1	1	0	1	1	0	1	1
73904	4833412C05Rik	0	0.0566138	0.04688	0	0	1	1	0	1	1	0	1	1	0	1	1	0	1	1	0	1	1
73761	4833415N18Rik	0.0217585	0	0.260753	0.0231028	0	1	1	-2.1256	0.0347709	0.0106316	0	1	1	-0.874518	0.333194	0.211705	0	1	1	2.12615	0.024021	0.0081245
73906	4833417C18Rik	0	0.27144	0.126734	0.544513	0	1	1	0	1	1	0	1	1	0	1	1	0	1	1	-1.47934	0.145332	0.078106
74597	4833418N02Rik	0.0949752	0	0.177019	0.227946	0	1	1	0	1	1	0	1	1	0	1	1	0	1	1	-1.25526	0.204046	0.119933
73915	4833419F23Rik	0	0	0	0	0	1	1	0	1	1	0	1	1	0	1	1	0	1	1	0	1	1
67392	4833420G17Rik	4.13552	1.97595	2.51112	3.84496	1.0723	0.00341243	0.000636522	0.800217	0.00380664	0.000650466	0.266912	0.392156	0.262155	-0.270124	0.338337	0.216281	-0.81194	0.0156053	0.0060995	-0.532146	0.0459275	0.0184337
373852	4833422C13Rik	4.34897	4.93452	4.82447	5.87821	-0.031412	0.917435	0.871775	-0.0979511	0.662579	0.53451	-0.297504	0.253613	0.14531	-0.0645228	0.744461	0.640089	-0.267059	0.235115	0.16634	-0.200228	0.305225	0.201215
75768	4833422M21Rik	0.0836428	0	0.0625753	0.075312	0	1	1	0	1	1	0	1	1	0	1	1	0	1	1	0	1	1
228151	4833423E24Rik	0.0408334	0	0	0	0	1	1	0	1	1	0	1	1	0	1	1	0	1	1	0	1	1
74601	4833427F10Rik	0	0	0	0	0	1	1	0	1	1	0	1	1	0	1	1	0	1	1	0	1	1
235345	4833427G06Rik	0	0.905522	0	0	0	1	1	0	1	1	0	1	1	0	1	1	0	1	1	0	1	1
74602	4833428L15Rik	0	0	0	0	0	1	1	0	1	1	0	1	1	0	1	1	0	1	1	0	1	1
100503392	4833438C02Rik	0.305687	0	0.209217	0.0616589	0	1	1	0.955388	0.458016	0.318001	0	1	1	0	1	1	0	1	1	0	1	1
97820	4833439L19Rik	14.4433	10.5393	10.7542	10.3542	0.466581	0.131324	0.0614565	0.41315	0.10211	0.0431998	0.558692	0.0624346	0.0229454	-0.0540042	0.764162	0.665553	0.099101	0.621936	0.545097	0.153251	0.394788	0.281258
78902	4833447P13Rik	0.024906	0	0.0848013	0.0960114	0	1	1	0	1	1	0	1	1	0	1	1	0	1	1	0	1	1
74042	4921501E09Rik	0	0	0	0	0	1	1	0	1	1	0	1	1	0	1	1	0	1	1	0	1	1
70832	4921504A21Rik	1.60445	2.42084	1.84066	1.96437	-0.756423	0.066574	0.0257344	-0.247398	0.504137	0.362965	-0.0960409	0.874104	0.812865	0.510347	0.093004	0.0408725	0.661846	0.1663	0.109571	0.149928	0.735511	0.644831
70909	4921504E06Rik	0	0	0	0	0	1	1	0	1	1	0	1	1	0	1	1	0	1	1	0	1	1
66709	4921507G05Rik	0	0	0	0	0	1	1	0	1	1	0	1	1	0	1	1	0	1	1	0	1	1
70821	4921507P07Rik	0.313817	0.200435	0.333415	0.435957	0.65065	0.58791	0.458875	-0.180142	0.846975	0.774925	-0.443802	0.631507	0.506265	-0.863278	0.204653	0.111897	-1.10767	0.0806412	0.0456346	-0.244688	0.655622	0.550316
70845	4921508D12Rik	0	0	0	0	0	1	1	0	1	1	0	1	1	0	1	1	0	1	1	0	1	1
381393	4921509C19Rik	0	0	0	0	0	1	1	0	1	1	0	1	1	0	1	1	0	1	1	0	1	1
70917	4921509O07Rik	0	0	0	0	0	1	1	0	1	1	0	1	1	0	1	1	0	1	1	0	1	1
70924	4921511C10Rik	0.38263	0.0747327	0.0570252	0.202458	0	1	1	0	1	1	0	1	1	0	1	1	0	1	1	0	1	1
245598	4921511C20Rik	0	0	0	0	0	1	1	0	1	1	0	1	1	0	1	1	0	1	1	0	1	1
70858	4921511I17Rik	4.84225	4.89839	6.46767	12.3694	-0.132822	0.739757	0.639627	-0.506419	0.0881217	0.0357844	-1.43052	0.00013483	1.09e-05	-0.376478	0.142192	0.0699637	-1.29577	5.69112e-05	5.71367e-06	-0.917653	0.000183057	1.59452e-05
667256	4921511M17Rik	0	0	0	0	0	1	1	0	1	1	0	1	1	0	1	1	0	1	1	0	1	1
100504457	4921513H07Rik	0.804195	0	0.0741762	0.21865	1.57707	0.0977457	0.0419588	3.24251	0.00125287	0.000163435	1.6753	0.0908968	0.0374524	0	1	1	0	1	1	0	1	1
70874	4921513I03Rik	0	0	0	0.0337139	0	1	1	0	1	1	0	1	1	0	1	1	0	1	1	0	1	1
70886	4921515E04Rik	0	0	0	0	0	1	1	0	1	1	0	1	1	0	1	1	0	1	1	0	1	1
70876	4921517D16Rik	0.0397949	0	0.0380106	0.11774	0	1	1	0	1	1	-1.11978	0.237749	0.133537	0	1	1	-2.09039	0.0175958	0.00709265	-1.56993	0.0219567	0.0072713
70900	4921517D22Rik	0	0	0	0	0	1	1	0	1	1	0	1	1	0	1	1	0	1	1	0	1	1
78758	4921518K17Rik	0	0	0	0	0	1	1	0	1	1	0	1	1	0	1	1	0	1	1	0	1	1
66719	4921522P10Rik	3.36072	3.25819	4.02711	6.29154	0.23929	0.580466	0.450342	-0.0888407	0.783787	0.692073	-0.728104	0.0977631	0.0412247	-0.321129	0.24214	0.139251	-0.964372	0.0333137	0.015542	-0.651951	0.0623862	0.0270521
66714	4921524J17Rik	3.99493	2.12081	4.30375	4.21558	1.01738	0.12774	0.0592483	-0.0390073	0.943071	0.90944	-0.106696	0.847889	0.775892	-1.05353	0.0311928	0.010476	-1.12729	0.0179262	0.00725766	-0.0702331	0.864447	0.806967
70901	4921524L21Rik	0	0	0	0	0	1	1	0	1	1	0	1	1	0	1	1	0	1	1	0	1	1
102635409	4921525D07Rik	0	0	0	0	0	1	1	0	1	1	0	1	1	0	1	1	0	1	1	0	1	1
74050	4921525O09Rik	0	0	0.0292723	0	0	1	1	0	1	1	0	1	1	0	1	1	0	1	1	0	1	1
77049	4921528I07Rik	0	0	0	0	0	1	1	0	1	1	0	1	1	0	1	1	0	1	1	0	1	1
320178	4921529L05Rik	0	0	0	0	0	1	1	0	1	1	0	1	1	0	1	1	0	1	1	0	1	1
66732	4921530L21Rik	0	0	0	0	0	1	1	0	1	1	0	1	1	0	1	1	0	1	1	0	1	1
66730	4921531C22Rik	0.447933	0.397124	0.262794	0.463514	0	1	1	-0.0306969	0.973686	0.958435	-0.659064	0.412007	0.280881	0.576942	0.357493	0.232913	-0.0472685	0.938451	0.918673	-0.624315	0.179405	0.102228
70960	4921531P14Rik	0	0	0	0	0	1	1	0	1	1	0	1	1	0	1	1	0	1	1	0	1	1
102640241	4921532D01Rik	0.172865	0	0.274329	0.26872	0	1	1	0	1	1	0	1	1	0	1	1	0	1	1	0	1	1
664619	4921533I20Rik	0	0	0	0	0	1	1	0	1	1	0	1	1	0	1	1	0	1	1	0	1	1
66737	4921534H16Rik	0.430278	0.250927	0.0516259	1.77969	1.82891	0.302832	0.184242	3.32563	0.0156269	0.00380846	-1.79913	0.0713887	0.0272491	1.51198	0.064523	0.0258566	-3.63474	0.0103609	0.0036697	-5.14316	0.000185389	1.62096e-05
67430	4921536K21Rik	0.110535	0.406323	0.0688804	0.0141648	0	1	1	0	1	1	0	1	1	0	1	1	0	1	1	0	1	1
70941	4921539E11Rik	0	0	0.023326	0.0741991	0	1	1	0	1	1	0	1	1	0	1	1	0	1	1	0	1	1
78256	4921539H07Rik	0.0683046	0	0	0	0	1	1	0	1	1	0	1	1	0	1	1	0	1	1	0	1	1
381816	4922502D21Rik	0	0	0	0	0	1	1	0	1	1	0	1	1	0	1	1	0	1	1	0	1	1
78136	4922502H24Rik	0	0	0	0	0	1	1	0	1	1	0	1	1	0	1	1	0	1	1	0	1	1
70962	4922502N22Rik	0	0	0	0	0	1	1	0	1	1	0	1	1	0	1	1	0	1	1	0	1	1
73803	4930401C15Rik	0	0	0	0	0	1	1	0	1	1	0	1	1	0	1	1	0	1	1	0	1	1
73816	4930401O10Rik	0	0	0	0	0	1	1	0	1	1	0	1	1	0	1	1	0	1	1	0	1	1
73924	4930401O12Rik	0	0	0	0	0	1	1	0	1	1	0	1	1	0	1	1	0	1	1	0	1	1
74852	4930402D18Rik	0	0	0	0	0	1	1	0	1	1	0	1	1	0	1	1	0	1	1	0	1	1
74854	4930402F06Rik	0	0	0	0	0	1	1	0	1	1	0	1	1	0	1	1	0	1	1	0	1	1
73796	4930402F11Rik	0	0	0	0.0589657	0	1	1	0	1	1	0	1	1	0	1	1	0	1	1	0	1	1
228602	4930402H24Rik	5.1395	4.05247	4.21412	5.24929	0.294443	0.446198	0.314495	0.307912	0.326002	0.20034	-0.0647549	0.862009	0.795696	0.0121754	0.952137	0.923796	-0.365877	0.0334102	0.0156007	-0.37718	0.0193271	0.00618562
75775	4930402K13Rik	0	0	0	0	0	1	1	0	1	1	0	1	1	0	1	1	0	1	1	0	1	1
73820	4930404A05Rik	0	0	0	0	0	1	1	0	1	1	0	1	1	0	1	1	0	1	1	0	1	1
73815	4930404H11Rik	0	0	0	0	0	1	1	0	1	1	0	1	1	0	1	1	0	1	1	0	1	1
67394	4930404I05Rik	0	0.111793	0.139872	0.444795	0	1	1	0	1	1	0	1	1	0	1	1	0	1	1	0	1	1
73918	4930404I20Rik	0	0	0	0	0	1	1	0	1	1	0	1	1	0	1	1	0	1	1	0	1	1
74845	4930404K13Rik	0.101455	0.0255683	0.0476892	0.849372	0	1	1	0	1	1	-2.43982	0.0687911	0.0259366	0	1	1	-2.75883	0.0288622	0.013069	-3.93591	0.00470352	0.00100208
432479	4930404N11Rik	0.777572	2.68911	1.43555	0.990347	-1.79521	0.0313935	0.0099307	-0.80378	0.217791	0.117107	-0.356065	0.661611	0.540485	1.00343	0.0470806	0.0175708	1.45498	0.0154479	0.00601794	0.437775	0.305947	0.201786
74896	4930405A10Rik	0	0	0	0	0	1	1	0	1	1	0	1	1	0	1	1	0	1	1	0	1	1
74846	4930405A21Rik	0.224231	0.246863	0.266498	1.1167	0	1	1	0	1	1	-2.68829	0.0245397	0.00684676	0	1	1	-1.87545	0.0319316	0.0147495	-2.35985	0.00376343	0.000751335
73795	4930405D01Rik	0	0	0	0	0	1	1	0	1	1	0	1	1	0	1	1	0	1	1	0	1	1
73922	4930405D11Rik	0	0	0	0	0	1	1	0	1	1	0	1	1	0	1	1	0	1	1	0	1	1
78150	4930405E02Rik	0	0	0	0	0	1	1	0	1	1	0	1	1	0	1	1	0	1	1	0	1	1
102638465	4930405H06Rik	0.0352134	0	0.00840635	0.0333968	0	1	1	0	1	1	0	1	1	0	1	1	0	1	1	0	1	1
73811	4930405J17Rik	1.28124	0	0.362017	0.817894	2.23151	0.0507977	0.0182538	1.92617	0.0379408	0.0119328	0.877876	0.322426	0.201613	0	1	1	0	1	1	0	1	1
78106	4930405L22Rik	0	0	0	0	0	1	1	0	1	1	0	1	1	0	1	1	0	1	1	0	1	1
414079	4930405O22Rik	0.862478	0.400798	0.251462	1.59055	1.61547	0.17236	0.0874571	1.53847	0.0259463	0.0072978	-0.91462	0.199998	0.106456	-0.0563863	0.94925	0.918702	-2.53409	0.0109416	0.00393141	-2.46001	0.000319813	3.22529e-05
73806	4930406D18Rik	0	0	0	0	0	1	1	0	1	1	0	1	1	0	1	1	0	1	1	0	1	1
77223	4930407G08Rik	0	0	0	0	0	1	1	0	1	1	0	1	1	0	1	1	0	1	1	0	1	1
78451	4930407I02Rik	0	0	0	0.0232937	0	1	1	0	1	1	0	1	1	0	1	1	0	1	1	0	1	1
328573	4930407I10Rik	0	0	0	0	0	1	1	0	1	1	0	1	1	0	1	1	0	1	1	0	1	1
77198	4930407I19Rik	0	0	0	0	0	1	1	0	1	1	0	1	1	0	1	1	0	1	1	0	1	1
73938	4930412B13Rik	0	0	0	0	0	1	1	0	1	1	0	1	1	0	1	1	0	1	1	0	1	1
320152	4930412C18Rik	0.0539935	0.188973	0.110786	0.0237531	0	1	1	-0.581844	0.618477	0.485454	0	1	1	1.59827	0.054088	0.0207835	0	1	1	1.35113	0.207925	0.122948
100039548	4930412E21Rik	0	0	0	0	0	1	1	0	1	1	0	1	1	0	1	1	0	1	1	0	1	1
102633576	4930412F09Rik	0	0	0	0	0	1	1	0	1	1	0	1	1	0	1	1	0	1	1	0	1	1
74849	4930412F12Rik	0	0.305967	0.107204	0.320553	0	1	1	0	1	1	0	1	1	0	1	1	0	1	1	0	1	1
73941	4930412L05Rik	0	0	0	0	0	1	1	0	1	1	0	1	1	0	1	1	0	1	1	0	1	1
381347	4930412O13Rik	0	0	0	0	0	1	1	0	1	1	0	1	1	0	1	1	0	1	1	0	1	1
74627	4930413E15Rik	0	0	0	0	0	1	1	0	1	1	0	1	1	0	1	1	0	1	1	0	1	1
102632305	4930413E20Rik	0	0	0	0	0	1	1	0	1	1	0	1	1	0	1	1	0	1	1	0	1	1
71637	4930413F20Rik	0	0	0.166267	0.155307	0	1	1	0	1	1	0	1	1	0	1	1	0	1	1	0	1	1
73951	4930413G21Rik	0.0358312	0	0.0729064	0.0684246	0	1	1	0	1	1	0	1	1	0	1	1	0	1	1	0	1	1
73889	4930413M19Rik	0	0	0	0	0	1	1	0	1	1	0	1	1	0	1	1	0	1	1	0	1	1
78790	4930414F18Rik	0	0	0	0	0	1	1	0	1	1	0	1	1	0	1	1	0	1	1	0	1	1
73894	4930414N06Rik	0.704135	0.559497	0.717871	0.857908	0	1	1	0.276892	0.779732	0.686658	-0.639209	0.515252	0.380315	-0.0824979	0.923633	0.880469	0	1	1	-0.897773	0.137988	0.0731423
245511	4930415L06Rik	0	0	0	0	0	1	1	0	1	1	0	1	1	0	1	1	0	1	1	0	1	1
73863	4930415O20Rik	0.121562	0	0.0274181	0	0	1	1	0	1	1	0	1	1	0	1	1	0	1	1	0	1	1
414106	4930417H01Rik	0	0	0.0178375	0.0721522	0	1	1	0	1	1	0	1	1	0	1	1	0	1	1	0	1	1
73870	4930417O13Rik	0	0	0.0695748	0	0	1	1	0	1	1	0	1	1	0	1	1	0	1	1	0	1	1
73887	4930417O22Rik	0	0	0	0	0	1	1	0	1	1	0	1	1	0	1	1	0	1	1	0	1	1
73874	4930419G24Rik	5.46315	0.792131	0.986573	1.06629	2.41038	0.000625624	7.99981e-05	2.32773	1.19428e-05	4.92443e-07	1.89135	0.00198861	0.000290053	-0.0771114	0.881113	0.82007	-0.515707	0.427714	0.344352	-0.434493	0.367366	0.255907
195712	4930421P07Rik	0	0	0	0	0	1	1	0	1	1	0	1	1	0	1	1	0	1	1	0	1	1
102636160	4930423B08Rik	0	0	0	0	0	1	1	0	1	1	0	1	1	0	1	1	0	1	1	0	1	1
73892	4930423D24Rik	0	0	0	0	0	1	1	0	1	1	0	1	1	0	1	1	0	1	1	0	1	1
73872	4930423M02Rik	0	0	0	0	0	1	1	0	1	1	0	1	1	0	1	1	0	1	1	0	1	1
102635903	4930424E08Rik	0	0	0	0	0	1	1	0	1	1	0	1	1	0	1	1	0	1	1	0	1	1
73865	4930425K10Rik	0	0	0	0	0	1	1	0	1	1	0	1	1	0	1	1	0	1	1	0	1	1
75024	4930425L21Rik	0.0649023	0	0.0814829	0.154271	0	1	1	0	1	1	0	1	1	0	1	1	0	1	1	0	1	1
74635	4930425O10Rik	0	0	0	0	0	1	1	0	1	1	0	1	1	0	1	1	0	1	1	0	1	1
74644	4930426D05Rik	0	0.374638	0.567542	0	0	1	1	-4.12302	6.82571e-05	4.36961e-06	0	1	1	-0.745182	0.286017	0.172956	0	1	1	4.35865	1.06298e-05	4.45623e-07
100504512	4930426I24Rik	0.341763	0	0.192166	0.117227	0	1	1	1.69444	0.27896	0.162381	0	1	1	0	1	1	0	1	1	0	1	1
74629	4930426L09Rik	0.0719632	0.0917195	0.091952	0	0	1	1	0	1	1	0	1	1	0	1	1	0	1	1	0	1	1
78110	4930428D20Rik	0	0	0	0	0	1	1	0	1	1	0	1	1	0	1	1	0	1	1	0	1	1
73867	4930428E07Rik	0.0335811	0	0.158028	0.426248	0	1	1	0	1	1	0	1	1	0	1	1	0	1	1	0	1	1
73856	4930428G15Rik	0	0	0	0	0	1	1	0	1	1	0	1	1	0	1	1	0	1	1	0	1	1
73871	4930428N03Rik	0	0	0	0	0	1	1	0	1	1	0	1	1	0	1	1	0	1	1	0	1	1
654809	4930428O21Rik	0	0	0	0	0	1	1	0	1	1	0	1	1	0	1	1	0	1	1	0	1	1
67576	4930429B21Rik	1.13245	1.0967	1.19295	0.971468	-0.0586211	0.940718	0.906933	0.0982592	0.841062	0.767773	0.458614	0.409031	0.277897	0.152313	0.764382	0.666035	0.515329	0.310305	0.232261	0.363868	0.289706	0.187721
74624	4930429D17Rik	0	0	0	0	0	1	1	0	1	1	0	1	1	0	1	1	0	1	1	0	1	1
74622	4930429F11Rik	0	0	0	0	0	1	1	0	1	1	0	1	1	0	1	1	0	1	1	0	1	1
74633	4930429F24Rik	0.986532	0.226553	2.12243	0.92378	0.694552	0.643222	0.524217	-2.01565	0.0171571	0.00429459	-0.852029	0.442401	0.308661	-2.69401	0.000392272	4.96736e-05	-1.55336	0.0975395	0.0575631	1.14498	0.0257028	0.00886136
100505025	4930429H19Rik	0.0615827	0	0.0215036	0.181896	0	1	1	0	1	1	0	1	1	0	1	1	0	1	1	0	1	1
67575	4930430A15Rik	0	0	0	0	0	1	1	0	1	1	0	1	1	0	1	1	0	1	1	0	1	1
71639	4930430E12Rik	0	0	0	0	0	1	1	0	1	1	0	1	1	0	1	1	0	1	1	0	1	1
68281	4930430F08Rik	2.35602	2.0628	4.30262	5.15695	0.0933882	0.876479	0.814551	-1.00189	0.0090811	0.00191551	-1.21413	0.00678249	0.0013263	-1.09599	0.001617	0.000276512	-1.30142	0.00175594	0.000403906	-0.219482	0.403815	0.289465
73784	4930430F21Rik	0	0	0	0	0	1	1	0	1	1	0	1	1	0	1	1	0	1	1	0	1	1
73772	4930430J02Rik	0	0	0.109594	0.305142	0	1	1	0	1	1	0	1	1	0	1	1	0	1	1	0	1	1
78154	4930430O22Rik	0	0	0	0.136138	0	1	1	0	1	1	0	1	1	0	1	1	0	1	1	0	1	1
71638	4930431F10Rik	0	0	0	0	0	1	1	0	1	1	0	1	1	0	1	1	0	1	1	0	1	1
75783	4930431F12Rik	0	0	0	0	0	1	1	0	1	1	0	1	1	0	1	1	0	1	1	0	1	1
73895	4930431P03Rik	0	0	0	0	0	1	1	0	1	1	0	1	1	0	1	1	0	1	1	0	1	1
73883	4930431P22Rik	0.0177557	0	0.00320156	0	0	1	1	0	1	1	0	1	1	0	1	1	0	1	1	0	1	1
243900	4930432E11Rik	0	0	0	0.0253059	0	1	1	0	1	1	0	1	1	0	1	1	0	1	1	0	1	1
73877	4930432J09Rik	0	0	0	0	0	1	1	0	1	1	0	1	1	0	1	1	0	1	1	0	1	1
74666	4930432K21Rik	0.203617	0.264872	0.252305	0.440211	-0.805745	0.535107	0.402312	-0.907522	0.314382	0.190961	-1.50699	0.135754	0.0635025	-0.128673	0.86898	0.801544	-0.697921	0.364752	0.282345	-0.594936	0.223892	0.135023
74621	4930432L08Rik	0	0	0	0	0	1	1	0	1	1	0	1	1	0	1	1	0	1	1	0	1	1
619318	4930432M17Rik	0	0	0	0	0	1	1	0	1	1	0	1	1	0	1	1	0	1	1	0	1	1
74647	4930432O09Rik	0	0	0	0	0	1	1	0	1	1	0	1	1	0	1	1	0	1	1	0	1	1
73959	4930433B08Rik	0	0	0	0	0	1	1	0	1	1	0	1	1	0	1	1	0	1	1	0	1	1
243944	4930433I11Rik	0	0	0	0	0	1	1	0	1	1	0	1	1	0	1	1	0	1	1	0	1	1
114673	4930433N12Rik	0	0	0	0	0	1	1	0	1	1	0	1	1	0	1	1	0	1	1	0	1	1
73973	4930434B07Rik	0	0	0	0	0	1	1	0	1	1	0	1	1	0	1	1	0	1	1	0	1	1
74667	4930434J06Rik	0	0	0	0	0	1	1	0	1	1	0	1	1	0	1	1	0	1	1	0	1	1
74663	4930435E12Rik	0	0	0	0	0	1	1	0	1	1	0	1	1	0	1	1	0	1	1	0	1	1
102638442	4930435F05Rik	0	0	0	0	0	1	1	0	1	1	0	1	1	0	1	1	0	1	1	0	1	1
74680	4930435F18Rik	0	0	0	0	0	1	1	0	1	1	0	1	1	0	1	1	0	1	1	0	1	1
73976	4930437M23Rik	0	0	0	0	0	1	1	0	1	1	0	1	1	0	1	1	0	1	1	0	1	1
73988	4930438A08Rik	0	0	0	0	0	1	1	0	1	1	0	1	1	0	1	1	0	1	1	0	1	1
73977	4930438E09Rik	0	0	0	0	0	1	1	0	1	1	0	1	1	0	1	1	0	1	1	0	1	1
78119	4930439A04Rik	0.387115	0.141593	0.161706	0.392729	2.07925	0.130353	0.0608498	1.28318	0.0811901	0.0322307	-0.366196	0.68055	0.562651	-0.775315	0.29564	0.180515	-2.44611	0.0300658	0.0137092	-1.65024	0.00979802	0.00258223
74689	4930440C22Rik	0	0	0	0	0	1	1	0	1	1	0	1	1	0	1	1	0	1	1	0	1	1
78158	4930440I19Rik	0	0	0	0	0	1	1	0	1	1	0	1	1	0	1	1	0	1	1	0	1	1
78156	4930441H08Rik	0	0	0	0	0	1	1	0	1	1	0	1	1	0	1	1	0	1	1	0	1	1
73962	4930441J16Rik	0	0	0	0	0	1	1	0	1	1	0	1	1	0	1	1	0	1	1	0	1	1
75800	4930442E04Rik	0	0.850561	0.208405	0.550288	0	1	1	0	1	1	0	1	1	0	1	1	0.941798	0.202657	0.138885	-1.20068	0.109437	0.0545336
74660	4930442J19Rik	0	0	0	0	0	1	1	0	1	1	0	1	1	0	1	1	0	1	1	0	1	1
67583	4930442L01Rik	0	0	0	0	0	1	1	0	1	1	0	1	1	0	1	1	0	1	1	0	1	1
74687	4930443O20Rik	0.156572	0	0	0.0552035	0	1	1	0	1	1	0	1	1	0	1	1	0	1	1	0	1	1
73980	4930444A19Rik	0.0623814	0.162457	0.152214	0.428452	0	1	1	-0.745829	0.387537	0.252767	-2.10029	0.0210879	0.00563758	0.149153	0.869176	0.802237	-1.18408	0.133736	0.0842677	-1.32938	0.0202843	0.00658683
73968	4930444F02Rik	0.0310629	0	0.0261538	0.164482	0	1	1	0.504855	0.741488	0.635901	-1.21431	0.429439	0.29615	0	1	1	0	1	1	0	1	1
114671	4930444G20Rik	0	0	0	0	0	1	1	0	1	1	0	1	1	0	1	1	0	1	1	0	1	1
75789	4930444M15Rik	0	0	0	0.0223664	0	1	1	0	1	1	0	1	1	0	1	1	0	1	1	0	1	1
75799	4930444P10Rik	0.0911139	0	0.0211431	0.06584	0	1	1	0	1	1	0	1	1	0	1	1	0	1	1	0	1	1
78115	4930445E18Rik	0.0762334	0	0	0	0	1	1	0	1	1	0	1	1	0	1	1	0	1	1	0	1	1
73985	4930445N18Rik	0	0	0	0	0	1	1	0	1	1	0	1	1	0	1	1	0	1	1	0	1	1
74892	4930447A16Rik	0.807708	0.348957	0.0535928	1.57633	1.52274	0.19938	0.105374	3.41044	0.00527983	0.000977384	-0.601184	0.455788	0.321219	0	1	1	-2.13332	0.0141517	0.00540473	-3.99296	0.000347561	3.57913e-05
75801	4930447C04Rik	0.435291	0.191679	0.582087	2.93551	1.62841	0.222652	0.121955	-0.110834	0.883881	0.824726	-2.07549	0.02489	0.00696255	-1.72804	0.0014439	0.000240665	-3.70843	0.00663127	0.00211049	-1.96879	0.00257872	0.000471235
76873	4930447F24Rik	0.314884	0.0220391	0.0704515	0.406655	0	1	1	0	1	1	-0.441211	0.74847	0.647749	0	1	1	-1.52399	0.161087	0.105463	-1.87012	0.0394888	0.0152292
73961	4930447J18Rik	0	0	0	0	0	1	1	0	1	1	0	1	1	0	1	1	0	1	1	0	1	1
432745	4930447K03Rik	0	0	0.0341263	0	0	1	1	0	1	1	0	1	1	0	1	1	0	1	1	0	1	1
108871	4930447M23Rik	1.26757	0.088014	0.681667	2.04791	3.51467	0.000616734	7.85213e-05	0.818185	0.0418157	0.0134545	-0.694435	0.0567266	0.0203683	-2.69135	0.000189175	2.04835e-05	-4.20916	1.03842e-06	3.95026e-08	-1.50767	2.96857e-05	1.62316e-06
71647	4930447N08Rik	0.145735	1.8941	0.0841287	1.79909	0	1	1	0	1	1	-3.50249	0.000687738	7.83159e-05	0	1	1	0.318709	0.431889	0.348384	-4.15464	4.12257e-06	1.35045e-07
73972	4930448C13Rik	0	0	0	0	0	1	1	0	1	1	0	1	1	0	1	1	0	1	1	0	1	1
102633321	4930448E22Rik	0	0	0.0189409	0.0162933	0	1	1	0	1	1	0	1	1	0	1	1	0	1	1	0	1	1
73992	4930448F12Rik	0	0	0	0	0	1	1	0	1	1	0	1	1	0	1	1	0	1	1	0	1	1
74872	4930448H16Rik	0	0	0	0	0	1	1	0	1	1	0	1	1	0	1	1	0	1	1	0	1	1
74897	4930448I06Rik	0	0	0	0	0	1	1	0	1	1	0	1	1	0	1	1	0	1	1	0	1	1
73965	4930448I18Rik	0	0	0	0	0	1	1	0	1	1	0	1	1	0	1	1	0	1	1	0	1	1
74662	4930448K20Rik	0	0	0	0	0	1	1	0	1	1	0	1	1	0	1	1	0	1	1	0	1	1
73994	4930449C09Rik	0	0	0	0	0	1	1	0	1	1	0	1	1	0	1	1	0	1	1	0	1	1
74864	4930449E01Rik	0	0	0	0	0	1	1	0	1	1	0	1	1	0	1	1	0	1	1	0	1	1
78120	4930449E18Rik	1.1276	0	0.247053	2.5863	0	1	1	0	1	1	-1.54355	0.137303	0.0644003	0	1	1	-2.43473	0.00599284	0.00185245	-3.46752	0.000382605	4.05373e-05
67410	4930449I24Rik	0	0	0	0	0	1	1	0	1	1	0	1	1	0	1	1	0	1	1	0	1	1
78111	4930451E10Rik	0.0294195	0	0.0862849	0.345391	0	1	1	0	1	1	0	1	1	0	1	1	0	1	1	0	1	1
74684	4930451G09Rik	0.393807	0.657266	0.572117	0.614459	-0.0825565	0.931278	0.89244	-0.426148	0.45786	0.317826	-0.523165	0.466605	0.332579	-0.294536	0.624725	0.500042	-0.441026	0.522524	0.439338	-0.112267	0.82588	0.755356
78118	4930451I11Rik	0.196166	0	0	0.0905771	0	1	1	0	1	1	0	1	1	0	1	1	0	1	1	0	1	1
71092	4930452A19Rik	0	0	0	0	0	1	1	0	1	1	0	1	1	0	1	1	0	1	1	0	1	1
74430	4930452B06Rik	1.12453	3.27268	6.34263	1.32706	-1.40689	0.000790094	0.000107455	-2.38698	8.04155e-07	1.55555e-08	-0.193823	0.62001	0.493138	-0.978861	0.000209469	2.30791e-05	1.2129	6.71829e-05	7.00644e-06	2.19472	2.60391e-08	2.56108e-10
73989	4930452G13Rik	0	0	0	0	0	1	1	0	1	1	0	1	1	0	1	1	0	1	1	0	1	1
78112	4930452N14Rik	0	0	0	0	0	1	1	0	1	1	0	1	1	0	1	1	0	1	1	0	1	1
100503481	4930453H23Rik	0	0	0	0	0	1	1	0	1	1	0	1	1	0	1	1	0	1	1	0	1	1
74688	4930453L07Rik	0	0	0	0	0	1	1	0	1	1	0	1	1	0	1	1	0	1	1	0	1	1
67609	4930453N24Rik	1.78485	2.1339	1.94381	2.22083	-0.467367	0.180817	0.0928207	-0.266327	0.372112	0.238514	-0.495066	0.0955621	0.0400074	0.205192	0.396251	0.267145	-0.0362063	0.868286	0.829176	-0.23546	0.203084	0.119166
74859	4930455B14Rik	0	0	0.0216497	0	0	1	1	0	1	1	0	1	1	0	1	1	0	1	1	0	1	1
73990	4930455C13Rik	1.92443	1.35252	1.11552	1.29798	0.548259	0.517971	0.385077	1.02603	0.121234	0.0540419	0.169187	0.824739	0.744623	0.481679	0.416875	0.285558	-0.381062	0.498885	0.414897	-0.847114	0.0961623	0.0463573
75795	4930455D15Rik	0	0	0	0.05664	0	1	1	0	1	1	0	1	1	0	1	1	0	1	1	0	1	1
76397	4930455F16Rik	0	0	0	0	0	1	1	0	1	1	0	1	1	0	1	1	0	1	1	0	1	1
78917	4930455G09Rik	0	0	0	0	0	1	1	0	1	1	0	1	1	0	1	1	0	1	1	0	1	1
74654	4930455H04Rik	1.27845	0	0.072034	0	3.50197	0.00040302	4.64499e-05	4.20661	0.000102538	7.23705e-06	4.56006	5.24709e-05	3.43569e-06	0	1	1	0	1	1	0	1	1
67585	4930455J16Rik	0	0	0	0	0	1	1	0	1	1	0	1	1	0	1	1	0	1	1	0	1	1
71650	4930456L15Rik	0.0260431	0	0	0	0	1	1	0	1	1	0	1	1	0	1	1	0	1	1	0	1	1
330146	4930458A03Rik	0	0	0	0	0	1	1	0	1	1	0	1	1	0	1	1	0	1	1	0	1	1
74881	4930459C07Rik	0	0	0	0	0	1	1	0	1	1	0	1	1	0	1	1	0	1	1	0	1	1
74690	4930459I23Rik	0	0	0	0	0	1	1	0	1	1	0	1	1	0	1	1	0	1	1	0	1	1
78163	4930459L07Rik	0	0	0	0	0	1	1	0	1	1	0	1	1	0	1	1	0	1	1	0	1	1
74883	4930461C15Rik	0	0	0	0.0216807	0	1	1	0	1	1	0	1	1	0	1	1	0	1	1	0	1	1
74879	4930461G14Rik	0.0890073	0	0.116042	0.0510632	0	1	1	0	1	1	0	1	1	0	1	1	0	1	1	0	1	1
75804	4930463O16Rik	0	0	0	0	0	1	1	0	1	1	0	1	1	0	1	1	0	1	1	0	1	1
67640	4930465K10Rik	0	0	0	0	0	1	1	0	1	1	0	1	1	0	1	1	0	1	1	0	1	1
74968	4930465M20Rik	0	0	0	0	0	1	1	0	1	1	0	1	1	0	1	1	0	1	1	0	1	1
75814	4930467D21Rik	0	0	0	0	0	1	1	0	1	1	0	1	1	0	1	1	0	1	1	0	1	1
626415	4930467E23Rik	0	0	0	0	0	1	1	0	1	1	0	1	1	0	1	1	0	1	1	0	1	1
74909	4930467J12Rik	0	0	0	0	0	1	1	0	1	1	0	1	1	0	1	1	0	1	1	0	1	1
74928	4930467K11Rik	0	0	0.0214642	0.0868222	0	1	1	0	1	1	0	1	1	0	1	1	0	1	1	0	1	1
76874	4930469K13Rik	0.0472605	0	0	0.0143529	0	1	1	0	1	1	0	1	1	0	1	1	0	1	1	0	1	1
102637336	4930470B04Rik	1.71567	0	0.185935	0.131246	4.51032	0.0334413	0.0107053	2.95234	0.0114001	0.00255548	3.15359	0.0329637	0.0100504	-1.52586	0.0552321	0.0213768	0	1	1	0.165886	0.809986	0.734851
75815	4930470H14Rik	0	0	0	0	0	1	1	0	1	1	0	1	1	0	1	1	0	1	1	0	1	1
75017	4930470O06Rik	0	0	0.0207947	0	0	1	1	0	1	1	0	1	1	0	1	1	0	1	1	0	1	1
67637	4930470P17Rik	0	0	0.170693	0	0	1	1	0	1	1	0	1	1	0	1	1	0	1	1	0	1	1
78176	4930471C04Rik	0.043865	0	0	0.114214	0	1	1	0	1	1	0	1	1	0	1	1	0	1	1	0	1	1
74923	4930471D02Rik	0	0	0	0	0	1	1	0	1	1	0	1	1	0	1	1	0	1	1	0	1	1
74912	4930471E19Rik	0	0	0	0	0	1	1	0	1	1	0	1	1	0	1	1	0	1	1	0	1	1
74966	4930471G03Rik	0	0	0.0289385	0.352933	0	1	1	0	1	1	0	1	1	0	1	1	0	1	1	0	1	1
74939	4930471G24Rik	0	0	0	0	0	1	1	0	1	1	0	1	1	0	1	1	0	1	1	0	1	1
75022	4930471L23Rik	0	0	0	0	0	1	1	0	1	1	0	1	1	0	1	1	0	1	1	0	1	1
75787	4930471M09Rik	0	0	0.080141	0	0	1	1	0	1	1	0	1	1	0	1	1	0	1	1	0	1	1
321014	4930473A02Rik	10.0683	3.56881	4.01877	4.13088	1.49618	0.000749573	9.9981e-05	1.28216	7.6523e-05	5.06932e-06	1.26933	0.000446829	4.62382e-05	-0.213178	0.452643	0.318751	-0.228498	0.407887	0.324371	-0.0154036	0.950406	0.927039
74926	4930473H19Rik	0.188072	0.175663	0.137824	0.33998	0	1	1	0.666941	0.464096	0.323591	-0.778433	0.328653	0.206737	0.721037	0.317543	0.19816	-0.698407	0.219073	0.152852	-1.43503	0.0182512	0.00575711
75025	4930473O22Rik	0	0	0	0	0	1	1	0	1	1	0	1	1	0	1	1	0	1	1	0	1	1
320624	4930474G06Rik	0	0	0.00951875	0	0	1	1	0	1	1	0	1	1	0	1	1	0	1	1	0	1	1
74967	4930474H20Rik	0	0	0	0	0	1	1	0	1	1	0	1	1	0	1	1	0	1	1	0	1	1
74917	4930474M22Rik	0.561209	0	0	0	0	1	1	0	1	1	0	1	1	0	1	1	0	1	1	0	1	1
218921	4930474N05Rik	0	0	0	0	0	1	1	0	1	1	0	1	1	0	1	1	0	1	1	0	1	1
67639	4930474N09Rik	0	0	0	0	0	1	1	0	1	1	0	1	1	0	1	1	0	1	1	0	1	1
74905	4930477N07Rik	0	0	0	0	0	1	1	0	1	1	0	1	1	0	1	1	0	1	1	0	1	1
75818	4930478L05Rik	1.73052	0	0.0102978	0.11528	4.01744	0.00329176	0.000609019	5.54798	0.00012724	9.40596e-06	4.04112	0.00230145	0.000347003	0	1	1	0	1	1	0	1	1
74429	4930478P22Rik	0	0	0	0	0	1	1	0	1	1	0	1	1	0	1	1	0	1	1	0	1	1
74925	4930479D17Rik	0.631647	0.330311	0.344148	0.54879	0	1	1	0	1	1	0	1	1	0	1	1	0	1	1	0	1	1
102635219	4930480C01Rik	0	0	0	0	0	1	1	0	1	1	0	1	1	0	1	1	0	1	1	0	1	1
74910	4930480E11Rik	0	0	0	0	0	1	1	0	1	1	0	1	1	0	1	1	0	1	1	0	1	1
74988	4930480G23Rik	0	0	0	0	0	1	1	0	1	1	0	1	1	0	1	1	0	1	1	0	1	1
78800	4930480K15Rik	1.16445	0.154831	0.883866	12.8605	2.11228	0.270376	0.158569	0.45349	0.655879	0.526823	-3.51058	0.00128201	0.000167102	-1.68199	0.032962	0.01123	-5.62662	0.000651237	0.000113386	-3.95219	6.84145e-06	2.57153e-07
75016	4930480K23Rik	0.385913	0.120213	0.350422	0.187154	0	1	1	0.727003	0.5565	0.418374	0.735237	0.493591	0.358568	-0.286087	0.835459	0.756278	0	1	1	0.0338177	0.979476	0.969407
74930	4930480M12Rik	0	0	0	0	0	1	1	0	1	1	0	1	1	0	1	1	0	1	1	0	1	1
74931	4930481A15Rik	0.879308	2.03687	0.805443	0.31222	-1.11284	0.0569405	0.021101	0.312498	0.629664	0.497821	1.56944	0.0396766	0.0128102	1.43597	0.00394873	0.000813746	2.68264	8.81502e-05	9.71085e-06	1.2425	0.0512598	0.0211686
75001	4930482G09Rik	0	0	0	0	0	1	1	0	1	1	0	1	1	0	1	1	0	1	1	0	1	1
67638	4930483J18Rik	0	0	0.0141852	0	0	1	1	0	1	1	0	1	1	0	1	1	0	1	1	0	1	1
74953	4930483K19Rik	0.31581	0.327949	0.218948	0.433647	0	1	1	0	1	1	0	1	1	0	1	1	0	1	1	0	1	1
74970	4930483O08Rik	0	0	0	0	0	1	1	0	1	1	0	1	1	0	1	1	0	1	1	0	1	1
75813	4930484H19Rik	0	0	0.00529466	0	0	1	1	0	1	1	0	1	1	0	1	1	0	1	1	0	1	1
74956	4930484I04Rik	0.123654	0	0.112299	0.733087	0	1	1	0	1	1	-1.78592	0.120347	0.0542163	0	1	1	0	1	1	0	1	1
78170	4930486F22Rik	0.744617	0	0.219051	0.608745	0	1	1	1.61916	0.177295	0.0892734	0.0898612	0.951468	0.923568	0	1	1	0	1	1	0	1	1
75028	4930486I03Rik	0	0	0	0	0	1	1	0	1	1	0	1	1	0	1	1	0	1	1	0	1	1
214639	4930486L24Rik	0	0	0	0	0	1	1	0	1	1	0	1	1	0	1	1	0	1	1	0	1	1
78172	4930487D11Rik	0	0	0	0	0	1	1	0	1	1	0	1	1	0	1	1	0	1	1	0	1	1
74992	4930487H11Rik	0.328255	0	0.117417	0.528362	0	1	1	0	1	1	0	1	1	0	1	1	0	1	1	0	1	1
74971	4930488B22Rik	0	0	0	0	0	1	1	0	1	1	0	1	1	0	1	1	0	1	1	0	1	1
75809	4930488L21Rik	0.552532	0.131917	0.28921	0.939314	1.15682	0.242555	0.137019	1.16497	0.098384	0.0411882	-0.375903	0.611448	0.483514	-0.0377754	0.964902	0.943141	-1.53533	0.0392001	0.0189789	-1.53783	0.00733175	0.00176381
75011	4930488N24Rik	0	0	0	0	0	1	1	0	1	1	0	1	1	0	1	1	0	1	1	0	1	1
74972	4930500A05Rik	0.112371	0	0.138625	0.043102	0	1	1	-0.136582	0.872721	0.808153	0	1	1	-0.526476	0.516415	0.382073	0	1	1	0.860783	0.163232	0.090477
70969	4930500F04Rik	0	0	0	0	0	1	1	0	1	1	0	1	1	0	1	1	0	1	1	0	1	1
102636338	4930500F10Rik	0.113669	0	0.316623	0.0680767	0	1	1	0	1	1	0	1	1	0	1	1	0	1	1	0	1	1
75037	4930500G05Rik	0	0	0	0	0	1	1	0	1	1	0	1	1	0	1	1	0	1	1	0	1	1
74973	4930500L23Rik	0.0414242	0	0	0	0	1	1	0	1	1	0	1	1	0	1	1	0	1	1	0	1	1
74951	4930502A04Rik	0	0	0	0	0	1	1	0	1	1	0	1	1	0	1	1	0	1	1	0	1	1
320733	4930502C15Rik	0.324527	0.169413	0.126843	0.628596	0.780369	0.247699	0.140891	1.19864	0.0214285	0.0056848	-0.840185	0.167904	0.0846509	0.423926	0.372044	0.245729	-1.6275	0.0312859	0.0143652	-2.04108	0.00100193	0.000141457
74995	4930502E09Rik	0.122627	0	0.0205545	0.181065	0	1	1	0	1	1	0	1	1	0	1	1	0	1	1	0	1	1
75013	4930502E18Rik	0	0	0.0454497	0.0575556	0	1	1	0	1	1	0	1	1	0	1	1	0	1	1	0	1	1
74974	4930502M04Rik	0	0	0	0	0	1	1	0	1	1	0	1	1	0	1	1	0	1	1	0	1	1
75015	4930503B20Rik	0	0	0	0	0	1	1	0	1	1	0	1	1	0	1	1	0	1	1	0	1	1
74954	4930503E14Rik	0	0	0	0	0	1	1	0	1	1	0	1	1	0	1	1	0	1	1	0	1	1
75030	4930503E24Rik	0.281902	0.552301	0.305379	0.164884	0	1	1	-0.174137	0.848071	0.776243	0	1	1	0	1	1	0	1	1	0	1	1
218902	4930503F20Rik	0	0	0	0	0	1	1	0	1	1	0	1	1	0	1	1	0	1	1	0	1	1
74941	4930503H13Rik	0	0	0	0	0	1	1	0	1	1	0	1	1	0	1	1	0	1	1	0	1	1
269033	4930503L19Rik	1.24971	1.02503	1.16613	2.38896	0.557301	0.41426	0.283421	0.164097	0.718964	0.60706	-0.844452	0.136033	0.0636759	-0.383285	0.347764	0.224131	-1.40339	0.0310769	0.0142544	-1.01312	0.0165857	0.00507872
74942	4930503O07Rik	0	0	0	0	0	1	1	0	1	1	0	1	1	0	1	1	0	1	1	0	1	1
75076	4930504C09Rik	0	0	0	0	0	1	1	0	1	1	0	1	1	0	1	1	0	1	1	0	1	1
403200	4930504O13Rik	0	0	0	0	0	1	1	0	1	1	0	1	1	0	1	1	0	1	1	0	1	1
75087	4930505A04Rik	0.0739633	0	0.168219	0.227568	0	1	1	0	1	1	0	1	1	0	1	1	0	1	1	0	1	1
75088	4930505G20Rik	0	0	0	0	0	1	1	0	1	1	0	1	1	0	1	1	0	1	1	0	1	1
78015	4930505K14Rik	0	0	0	0	0	1	1	0	1	1	0	1	1	0	1	1	0	1	1	0	1	1
75044	4930506A18Rik	0.904666	0.212096	0.38516	0.494497	1.71753	0.0654932	0.0251959	0.911876	0.0847967	0.0340529	0.711522	0.260727	0.150943	-0.79987	0.148188	0.0735743	-1.01023	0.105653	0.0632532	-0.195673	0.665012	0.560992
75060	4930506C21Rik	0.864237	0.477276	0.325895	1.70961	0.772299	0.493833	0.360943	1.36943	0.0896611	0.0365947	-0.81073	0.294409	0.178177	0	1	1	-1.58235	0.042547	0.0209655	-2.17029	0.000925444	0.000127392
74706	4930507D05Rik	0.105485	0.111034	0.0699565	0.108213	0	1	1	0	1	1	0	1	1	0	1	1	0	1	1	0	1	1
75043	4930507D10Rik	0	0	0	0	0	1	1	0	1	1	0	1	1	0	1	1	0	1	1	0	1	1
75115	4930509E16Rik	0	0	0.0130299	0.0334419	0	1	1	0	1	1	0	1	1	0	1	1	0	1	1	0	1	1
74693	4930509J09Rik	0.289054	0	0.254922	1.75044	0	1	1	0.525057	0.652969	0.523443	-2.06378	0.0893727	0.0366779	-1.50948	0.028019	0.00912175	-4.07097	0.00442063	0.00127589	-2.55236	0.0067431	0.00158713
75819	4930509K18Rik	0	0	0	0	0	1	1	0	1	1	0	1	1	0	1	1	0	1	1	0	1	1
74712	4930511A02Rik	0	0	0.0101983	0	0	1	1	0	1	1	0	1	1	0	1	1	0	1	1	0	1	1
78773	4930511E03Rik	0	0	0	0	0	1	1	0	1	1	0	1	1	0	1	1	0	1	1	0	1	1
75084	4930511M06Rik	0	0	0	0	0	1	1	0	1	1	0	1	1	0	1	1	0	1	1	0	1	1
74724	4930512B01Rik	2.19934	0.695743	0.882436	1.76225	1.70964	0.0263115	0.00788782	1.76388	0.00239174	0.00036353	0.584828	0.303658	0.185683	0.0460024	0.952878	0.924835	-1.12544	0.110667	0.0668821	-1.18201	0.0319557	0.0116749
75111	4930512H18Rik	0	0	0	0	0	1	1	0	1	1	0	1	1	0	1	1	0	1	1	0	1	1
75131	4930512J16Rik	0.0422642	0	0.00361235	0	0	1	1	0	1	1	0	1	1	0	1	1	0	1	1	0	1	1
102631730	4930512M02Rik	0	0	0	0	0	1	1	0	1	1	0	1	1	0	1	1	0	1	1	0	1	1
75095	4930513D17Rik	0	0	0	0	0	1	1	0	1	1	0	1	1	0	1	1	0	1	1	0	1	1
78021	4930513L16Rik	0.0244535	0.0888495	0.0537685	0.226968	0	1	1	0	1	1	0	1	1	0	1	1	0	1	1	0	1	1
319960	4930513N10Rik	0.323738	0.122561	0.178602	0.15774	0.168549	0.894445	0.838523	0.510271	0.594075	0.459328	0.639756	0.554804	0.421088	0.286937	0.728991	0.621258	0	1	1	0.16164	0.853782	0.792676
75125	4930513O06Rik	0	0	0	0	0	1	1	0	1	1	0	1	1	0	1	1	0	1	1	0	1	1
75128	4930515B02Rik	0	0	0	0	0	1	1	0	1	1	0	1	1	0	1	1	0	1	1	0	1	1
67642	4930515G01Rik	0	0.147033	0.224368	0.406152	0	1	1	0	1	1	0	1	1	0	1	1	0	1	1	0	1	1
75070	4930515G16Rik	0	0	0	0	0	1	1	0	1	1	0	1	1	0	1	1	0	1	1	0	1	1
75069	4930515L03Rik	0	0	0	0	0	1	1	0	1	1	0	1	1	0	1	1	0	1	1	0	1	1
75133	4930515L19Rik	0	0	0	0	0	1	1	0	1	1	0	1	1	0	1	1	0	1	1	0	1	1
74702	4930517E11Rik	0.0514916	0	0.0701542	0.0253711	0	1	1	0	1	1	0	1	1	0	1	1	0	1	1	0	1	1
67644	4930517G24Rik	0	0	0	0	0	1	1	0	1	1	0	1	1	0	1	1	0	1	1	0	1	1
75117	4930517M08Rik	0	0	0	0	0	1	1	0	1	1	0	1	1	0	1	1	0	1	1	0	1	1
75075	4930517O19Rik	0.311114	0.325184	0.265358	2.14936	-1.17243	0.329986	0.206745	-0.604748	0.565394	0.428596	-3.22794	0.0220148	0.00596113	0.555213	0.365827	0.240328	-2.06457	0.0828487	0.0471619	-2.60295	0.00679422	0.00160126
102638761	4930518C04Rik	0	0	0	0	0	1	1	0	1	1	0	1	1	0	1	1	0	1	1	0	1	1
75123	4930518J21Rik	0	0	0.0191352	0	0	1	1	0	1	1	0	1	1	0	1	1	0	1	1	0	1	1
71654	4930518P08Rik	0	0	0	0	0	1	1	0	1	1	0	1	1	0	1	1	0	1	1	0	1	1
75090	4930519D14Rik	0	0	0	0	0	1	1	0	1	1	0	1	1	0	1	1	0	1	1	0	1	1
114676	4930519F09Rik	0.0744208	0.207271	0.116718	0.0591666	0	1	1	0	1	1	0	1	1	0	1	1	0	1	1	0	1	1
75106	4930519F16Rik	0	0.220221	0.0160658	0.00653475	-4.1955	0.00373629	0.000712127	0	1	1	0	1	1	3.81394	0.000121226	1.20693e-05	4.16574	0.000525492	8.6924e-05	0	1	1
108970	4930519F24Rik	0	0	0	0	0	1	1	0	1	1	0	1	1	0	1	1	0	1	1	0	1	1
67593	4930519G04Rik	0	0	0	0.00789347	0	1	1	0	1	1	0	1	1	0	1	1	0	1	1	0	1	1
75058	4930519H02Rik	0	0	0	0	0	1	1	0	1	1	0	1	1	0	1	1	0	1	1	0	1	1
78019	4930519K11Rik	0.120616	0	0.118299	0.0703282	0	1	1	0	1	1	0	1	1	0	1	1	0	1	1	0	1	1
102636203	4930519L02Rik	0	0	0	0	0	1	1	0	1	1	0	1	1	0	1	1	0	1	1	0	1	1
102634716	4930520E11Rik	0.254324	0.511367	0.408371	0.788954	0	1	1	0	1	1	-1.44031	0.145057	0.0692781	0	1	1	-0.231248	0.770535	0.70949	-1.05272	0.0876347	0.0414974
78179	4930520K02Rik	0	0	0	0	0	1	1	0	1	1	0	1	1	0	1	1	0	1	1	0	1	1
75116	4930520O04Rik	0.0400281	0.0977096	0.290228	0.495226	0	1	1	0	1	1	0	1	1	0	1	1	0	1	1	0	1	1
75086	4930520P13Rik	0	0	0	0	0	1	1	0	1	1	0	1	1	0	1	1	0	1	1	0	1	1
75066	4930521E06Rik	0	0	0	0	0	1	1	0	1	1	0	1	1	0	1	1	0	1	1	0	1	1
75067	4930521O17Rik	0	0	0	0	0	1	1	0	1	1	0	1	1	0	1	1	0	1	1	0	1	1
67646	4930522H14Rik	0	0	0	0	0	1	1	0	1	1	0	1	1	0	1	1	0	1	1	0	1	1
78180	4930522O17Rik	0	0	0	0	0	1	1	0	1	1	0	1	1	0	1	1	0	1	1	0	1	1
67647	4930523C07Rik	0.100515	0.11532	0.0206155	0.0159201	-0.676458	0.63183	0.510918	1.22856	0.306588	0.184348	1.73818	0.255306	0.146602	0	1	1	0	1	1	0	1	1
74726	4930523O13Rik	0	0	0	0	0	1	1	0	1	1	0	1	1	0	1	1	0	1	1	0	1	1
67592	4930524B15Rik	0	0	0.0232613	0	0	1	1	0	1	1	0	1	1	0	1	1	0	1	1	0	1	1
74725	4930524B17Rik	0	0	0	0	0	1	1	0	1	1	0	1	1	0	1	1	0	1	1	0	1	1
75822	4930524C18Rik	0	0	0	0	0	1	1	0	1	1	0	1	1	0	1	1	0	1	1	0	1	1
75071	4930524N10Rik	0	0	0	0	0	1	1	0	1	1	0	1	1	0	1	1	0	1	1	0	1	1
75096	4930524O05Rik	0	0	0	0	0	1	1	0	1	1	0	1	1	0	1	1	0	1	1	0	1	1
74700	4930524O08Rik	0	0	0	0	0	1	1	0	1	1	0	1	1	0	1	1	0	1	1	0	1	1
78127	4930525C09Rik	0.0194095	0	0.053176	0	0	1	1	0	1	1	0	1	1	0	1	1	0	1	1	0	1	1
75100	4930525D18Rik	0	0	0	0	0	1	1	0	1	1	0	1	1	0	1	1	0	1	1	0	1	1
320163	4930525G20Rik	0.605474	0.409157	0.486378	0.314798	0.346907	0.702185	0.593374	0.13044	0.847869	0.775849	0.775591	0.321899	0.201206	-0.225917	0.674076	0.556862	0.429225	0.451043	0.367023	0.657844	0.167368	0.0934772
75193	4930526F13Rik	0	0	0	0	0	1	1	0	1	1	0	1	1	0	1	1	0	1	1	0	1	1
102636142	4930526H09Rik	0	0	0	0	0	1	1	0	1	1	0	1	1	0	1	1	0	1	1	0	1	1
75135	4930526I15Rik	0.332087	0.529312	0.653671	0.247577	0	1	1	-0.708263	0.256707	0.145804	0	1	1	-0.25777	0.682162	0.565644	0	1	1	1.1504	0.0481147	0.0195778
75138	4930526L06Rik	0	0	0	0	0	1	1	0	1	1	0	1	1	0	1	1	0	1	1	0	1	1
67651	4930527F14Rik	0	0	0	0	0	1	1	0	1	1	0	1	1	0	1	1	0	1	1	0	1	1
78199	4930527G23Rik	0	0	0	0	0	1	1	0	1	1	0	1	1	0	1	1	0	1	1	0	1	1
75164	4930527J03Rik	0	0	0	0	0	1	1	0	1	1	0	1	1	0	1	1	0	1	1	0	1	1
67735	4930528A17Rik	0.630903	0.269058	0.309685	0.893552	0.988758	0.25313	0.145331	1.0469	0.0829645	0.0330995	-0.483879	0.408644	0.277558	0.0539318	0.944968	0.913057	-1.4749	0.0221479	0.00949327	-1.53398	0.00151298	0.000237782
75223	4930528D03Rik	0.024908	0	0.0125251	0	0	1	1	0	1	1	0	1	1	0	1	1	0	1	1	0	1	1
75831	4930528G23Rik	0	0	0	0	0	1	1	0	1	1	0	1	1	0	1	1	0	1	1	0	1	1
78034	4930528H21Rik	0	0	0	0	0	1	1	0	1	1	0	1	1	0	1	1	0	1	1	0	1	1
78193	4930528P14Rik	0	0	0	0	0	1	1	0	1	1	0	1	1	0	1	1	0	1	1	0	1	1
619677	4930529C04Rik	0	0	0	0	0	1	1	0	1	1	0	1	1	0	1	1	0	1	1	0	1	1
102637001	4930529I22Rik	0	0	0	0	0	1	1	0	1	1	0	1	1	0	1	1	0	1	1	0	1	1
75155	4930529K09Rik	0	0	0	0	0	1	1	0	1	1	0	1	1	0	1	1	0	1	1	0	1	1
78023	4930529L06Rik	0	0	0	0	0	1	1	0	1	1	0	1	1	0	1	1	0	1	1	0	1	1
75197	4930529N20Rik	0	0	0	0	0	1	1	0	1	1	0	1	1	0	1	1	0	1	1	0	1	1
75833	4930532I03Rik	2.14336	0.438427	0.400948	1.38692	2.2926	0.0793188	0.0321824	2.08318	0.00705091	0.00140652	0.0985384	0.913399	0.869708	-0.189137	0.809559	0.72268	-2.19419	0.0429296	0.0212068	-1.9894	0.00372383	0.000741584
75233	4930532M18Rik	0	0	0	0	0	1	1	0	1	1	0	1	1	0	1	1	0	1	1	0	1	1
75166	4930533B01Rik	0.163722	0.344959	0.106486	0.499957	0	1	1	0	1	1	0	1	1	0	1	1	0	1	1	0	1	1
434018	4930533I22Rik	0	0	0.00625924	0	0	1	1	0	1	1	0	1	1	0	1	1	0	1	1	0	1	1
75189	4930533K18Rik	0	0	0	0	0	1	1	0	1	1	0	1	1	0	1	1	0	1	1	0	1	1
75205	4930533N22Rik	0	0	0	0	0	1	1	0	1	1	0	1	1	0	1	1	0	1	1	0	1	1
75159	4930533P14Rik	0	0	0	0	0	1	1	0	1	1	0	1	1	0	1	1	0	1	1	0	1	1
100503594	4930534D22Rik	0	0	0.0291281	0.0249768	0	1	1	0	1	1	0	1	1	0	1	1	0	1	1	0	1	1
102633753	4930534H03Rik	0	0	0	0	0	1	1	0	1	1	0	1	1	0	1	1	0	1	1	0	1	1
78027	4930535L15Rik	0.0451712	0.127503	0.00904877	0	0	1	1	0	1	1	0	1	1	0	1	1	0	1	1	0	1	1
75237	4930535O05Rik	0	0	0	0	0	1	1	0	1	1	0	1	1	0	1	1	0	1	1	0	1	1
78029	4930538L07Rik	0	0	0	0	0	1	1	0	1	1	0	1	1	0	1	1	0	1	1	0	1	1
75208	4930539C22Rik	0	0	0	0	0	1	1	0	1	1	0	1	1	0	1	1	0	1	1	0	1	1
207819	4930539E08Rik	0.296994	0.166194	1.03815	0.0491912	1.05443	0.327828	0.204556	-1.86771	0.00201993	0.000295385	2.01992	0.0472404	0.0160328	-2.8921	8.33451e-05	7.69701e-06	0	1	1	3.88704	7.63032e-06	2.95309e-07
319587	4930539J05Rik	3.03165	3.23854	2.56959	3.08673	0.175791	0.845811	0.772581	0.27329	0.617436	0.484331	0.04473	0.949883	0.921311	0.0780654	0.902618	0.850142	-0.145719	0.813087	0.760804	-0.225232	0.52187	0.406114
75149	4930539M17Rik	0	0	0.0411303	0	0	1	1	0	1	1	0	1	1	0	1	1	0	1	1	0	1	1
75203	4930539N22Rik	0.397958	0	0.432343	0.0369817	0	1	1	0.213412	0.797452	0.710755	0	1	1	-1.77497	0.0122006	0.00327545	0	1	1	2.34971	0.00595358	0.00135337
102637419	4930540E01Rik	0	0	0	0	0	1	1	0	1	1	0	1	1	0	1	1	0	1	1	0	1	1
78025	4930540M03Rik	0	0	0	0	0	1	1	0	1	1	0	1	1	0	1	1	0	1	1	0	1	1
112414	4930540M05Rik	0	0	0.0118617	0	0	1	1	0	1	1	0	1	1	0	1	1	0	1	1	0	1	1
75175	4930542C21Rik	0	0	0	0	0	1	1	0	1	1	0	1	1	0	1	1	0	1	1	0	1	1
75211	4930542D17Rik	0	0	0	0	0	1	1	0	1	1	0	1	1	0	1	1	0	1	1	0	1	1
75154	4930542M03Rik	0	0	0	0	0	1	1	0	1	1	0	1	1	0	1	1	0	1	1	0	1	1
75827	4930542N06Rik	1.26262	0.697025	0.746133	6.63674	0.315271	0.698932	0.588554	0.517985	0.282501	0.165282	-2.50057	0.000129339	1.03286e-05	0.203772	0.704663	0.593216	-2.81099	0.000344918	5.07648e-05	-3.02482	7.9152e-07	1.71547e-08
75239	4930543E12Rik	0	0	0	0	0	1	1	0	1	1	0	1	1	0	1	1	0	1	1	0	1	1
75160	4930543I03Rik	0	0	0	0	0	1	1	0	1	1	0	1	1	0	1	1	0	1	1	0	1	1
102635169	4930543I11Rik	0	0	0	0	0	1	1	0	1	1	0	1	1	0	1	1	0	1	1	0	1	1
75187	4930543N07Rik	0	0	0	0	0	1	1	0	1	1	0	1	1	0	1	1	0	1	1	0	1	1
668433	4930544D05Rik	0	0	0	0	0	1	1	0	1	1	0	1	1	0	1	1	0	1	1	0	1	1
67653	4930544G11Rik	0.0259776	0	0	0	0	1	1	0	1	1	0	1	1	0	1	1	0	1	1	0	1	1
75161	4930544M13Rik	0	0	0	0	0	1	1	0	1	1	0	1	1	0	1	1	0	1	1	0	1	1
75162	4930545E07Rik	0	0	0	0	0	1	1	0	1	1	0	1	1	0	1	1	0	1	1	0	1	1
75148	4930545H06Rik	0	0	0	0	0	1	1	0	1	1	0	1	1	0	1	1	0	1	1	0	1	1
78805	4930545L23Rik	0.326992	0.0486829	0.238519	1.15056	0.927054	0.567801	0.436722	0.210564	0.868101	0.801832	-2.02683	0.0919062	0.0379842	-0.746874	0.342933	0.220253	-2.96426	0.018563	0.00758012	-2.23319	0.00865903	0.00219358
78931	4930546C10Rik	0	0	0.00833756	0	0	1	1	0	1	1	0	1	1	0	1	1	0	1	1	0	1	1
78194	4930546K05Rik	0	0	0	0	0	1	1	0	1	1	0	1	1	0	1	1	0	1	1	0	1	1
78031	4930547E08Rik	0	0	0	0	0	1	1	0	1	1	0	1	1	0	1	1	0	1	1	0	1	1
75145	4930547E14Rik	1.16396	0	0.279852	0.950463	0	1	1	0	1	1	0.385742	0.757952	0.659929	0	1	1	0	1	1	0	1	1
75278	4930547H16Rik	0	0	0	0	0	1	1	0	1	1	0	1	1	0	1	1	0	1	1	0	1	1
102636581	4930548G05Rik	0	0	0	0	0	1	1	0	1	1	0	1	1	0	1	1	0	1	1	0	1	1
75281	4930548G14Rik	0	0	0	0	0	1	1	0	1	1	0	1	1	0	1	1	0	1	1	0	1	1
67656	4930548H24Rik	0	0	0	0	0	1	1	0	1	1	0	1	1	0	1	1	0	1	1	0	1	1
78043	4930548J01Rik	0	0	0	0	0	1	1	0	1	1	0	1	1	0	1	1	0	1	1	0	1	1
75360	4930548K13Rik	0	0	0	0	0	1	1	0	1	1	0	1	1	0	1	1	0	1	1	0	1	1
75243	4930549C15Rik	0.105508	0	0.043135	0.320935	0	1	1	0	1	1	-0.984343	0.413347	0.282159	0	1	1	-1.6572	0.115695	0.0706639	-2.83869	0.0259624	0.00897407
75286	4930549G23Rik	1.70402	0.988367	2.37129	2.2448	0.777362	0.340524	0.215624	-0.210941	0.718098	0.605973	-0.311843	0.623844	0.496856	-0.993836	0.0513526	0.0194815	-1.0849	0.0415051	0.02035	-0.10232	0.787222	0.707325
75311	4930550C14Rik	0	0.340827	0	0	0	1	1	0	1	1	0	1	1	0	1	1	0	1	1	0	1	1
75245	4930550C17Rik	0	0	0	0	0	1	1	0	1	1	0	1	1	0	1	1	0	1	1	0	1	1
75352	4930550L24Rik	0	0	0	0	0	1	1	0	1	1	0	1	1	0	1	1	0	1	1	0	1	1
75367	4930552N02Rik	0	0	0	0	0	1	1	0	1	1	0	1	1	0	1	1	0	1	1	0	1	1
102633643	4930552P06Rik	0.037343	0	0.0148346	0.0532868	0	1	1	0	1	1	0	1	1	0	1	1	0	1	1	0	1	1
77594	4930552P12Rik	0	0	0	0	0	1	1	0	1	1	0	1	1	0	1	1	0	1	1	0	1	1
75315	4930553C11Rik	0	0	0.0614542	0	0	1	1	0	1	1	0	1	1	0	1	1	0	1	1	0	1	1
75247	4930553E22Rik	0	0	0	0	0	1	1	0	1	1	0	1	1	0	1	1	0	1	1	0	1	1
75351	4930553J12Rik	0	0	0	0	0	1	1	0	1	1	0	1	1	0	1	1	0	1	1	0	1	1
75355	4930553P18Rik	0.36904	1.43855	0.661444	0.851069	-0.918377	0.429345	0.297851	-0.518156	0.561293	0.42373	-0.774594	0.395329	0.265223	0.365066	0.614285	0.48782	0.122945	0.864841	0.824299	-0.234577	0.605379	0.493555
75253	4930554C24Rik	0	0	0	0	0	1	1	0	1	1	0	1	1	0	1	1	0	1	1	0	1	1
77631	4930554H23Rik	0	0	0	0	0	1	1	0	1	1	0	1	1	0	1	1	0	1	1	0	1	1
75354	4930554I06Rik	0	0	0	0	0	1	1	0	1	1	0	1	1	0	1	1	0	1	1	0	1	1
102632493	4930554P06Rik	0	0	0	0	0	1	1	0	1	1	0	1	1	0	1	1	0	1	1	0	1	1
100504653	4930555A03Rik	0	0	0	0	0	1	1	0	1	1	0	1	1	0	1	1	0	1	1	0	1	1
75279	4930555B11Rik	0	0	0	0	0	1	1	0	1	1	0	1	1	0	1	1	0	1	1	0	1	1
78086	4930555B12Rik	0	0	0	0	0	1	1	0	1	1	0	1	1	0	1	1	0	1	1	0	1	1
108978	4930555G01Rik	0	0	0	0	0	1	1	0	1	1	0	1	1	0	1	1	0	1	1	0	1	1
75361	4930555K05Rik	0	0	0	0	0	1	1	0	1	1	0	1	1	0	1	1	0	1	1	0	1	1
75310	4930556C24Rik	0	0	0	0	0	1	1	0	1	1	0	1	1	0	1	1	0	1	1	0	1	1
75332	4930556G01Rik	0	0	0	0	0	1	1	0	1	1	0	1	1	0	1	1	0	1	1	0	1	1
75349	4930556J02Rik	0	0	0	0	0	1	1	0	1	1	0	1	1	0	1	1	0	1	1	0	1	1
75283	4930556L07Rik	0	0	0	0	0	1	1	0	1	1	0	1	1	0	1	1	0	1	1	0	1	1
75259	4930556M19Rik	0	0	0	0	0	1	1	0	1	1	0	1	1	0	1	1	0	1	1	0	1	1
75301	4930556N09Rik	0	0	0	0	0	1	1	0	1	1	0	1	1	0	1	1	0	1	1	0	1	1
75285	4930556N13Rik	0.0247284	0	0	0.0975466	0	1	1	0	1	1	0	1	1	0	1	1	0	1	1	0	1	1
75290	4930557B15Rik	0	0	0	0	0	1	1	0	1	1	0	1	1	0	1	1	0	1	1	0	1	1
75322	4930557F10Rik	0	0	0	0	0	1	1	0	1	1	0	1	1	0	1	1	0	1	1	0	1	1
75357	4930557J02Rik	0	0	0	0	0	1	1	0	1	1	0	1	1	0	1	1	0	1	1	0	1	1
67654	4930558C23Rik	0	0	0	0	0	1	1	0	1	1	0	1	1	0	1	1	0	1	1	0	1	1
75330	4930558F17Rik	0	0	0	0	0	1	1	0	1	1	0	1	1	0	1	1	0	1	1	0	1	1
75274	4930558G05Rik	0	0	0	0	0	1	1	0	1	1	0	1	1	0	1	1	0	1	1	0	1	1
75323	4930558J18Rik	0	0	0	0	0	1	1	0	1	1	0	1	1	0	1	1	0	1	1	0	1	1
75368	4930558K02Rik	0	0	0.0381987	0.102302	0	1	1	0	1	1	0	1	1	0	1	1	0	1	1	0	1	1
75295	4930559C10Rik	0	0	0	0	0	1	1	0	1	1	0	1	1	0	1	1	0	1	1	0	1	1
78809	4930562C15Rik	0.0160823	0	0.0451635	0.0593296	0	1	1	0	1	1	0	1	1	0	1	1	0	1	1	0	1	1
75255	4930562F07Rik	0	0.581961	0.0285777	0.0416749	0	1	1	0	1	1	0	1	1	0	1	1	0	1	1	0	1	1
75256	4930562F17Rik	0	0	0	0	0	1	1	0	1	1	0	1	1	0	1	1	0	1	1	0	1	1
75328	4930563D23Rik	0	0	0	0	0	1	1	0	1	1	0	1	1	0	1	1	0	1	1	0	1	1
75370	4930563E18Rik	0	0	0.112917	0.117875	0	1	1	0	1	1	0	1	1	0	1	1	0	1	1	0	1	1
75304	4930563E22Rik	0.100127	0.239844	0.254945	0.911374	0	1	1	-1.63761	0.0583026	0.0208167	-3.47401	0.00045723	4.75452e-05	0.0528559	0.940236	0.905725	-1.77315	0.00356057	0.000971484	-1.82081	0.000229699	2.1165e-05
75369	4930563F08Rik	0.847775	0.236514	0.537124	5.00887	0	1	1	0	1	1	-2.85639	0.0310024	0.00927843	0	1	1	-2.91163	0.01047	0.00372262	-3.45238	0.00183697	0.00030747
75347	4930563H07Rik	0	0	0	0	0	1	1	0	1	1	0	1	1	0	1	1	0	1	1	0	1	1
67659	4930563I02Rik	0.0568211	0	0.0102868	0.116974	0	1	1	0	1	1	0	1	1	0	1	1	0	1	1	0	1	1
78213	4930563M20Rik	0	0	0	0	0	1	1	0	1	1	0	1	1	0	1	1	0	1	1	0	1	1
75258	4930563M21Rik	0	0	0	0.0226615	0	1	1	0	1	1	0	1	1	0	1	1	0	1	1	0	1	1
75341	4930564C03Rik	0	0	0.0330741	0.269501	0	1	1	0	1	1	0	1	1	0	1	1	0	1	1	0	1	1
75269	4930564D02Rik	0	0	0	0	0	1	1	0	1	1	0	1	1	0	1	1	0	1	1	0	1	1
75309	4930565D16Rik	0	0	0	0	0	1	1	0	1	1	0	1	1	0	1	1	0	1	1	0	1	1
68306	4930565N06Rik	1.45113	0.844435	0.768102	2.84796	0.846023	0.632081	0.511477	0.164479	0.875073	0.811523	-1.50262	0.138871	0.0653285	-0.696661	0.382717	0.255111	-2.35248	0.0380035	0.0182568	-1.65969	0.00398091	0.00081053
75900	4930566D17Rik	0.0570167	0.0526139	0.0127884	0.0986084	0	1	1	0	1	1	0	1	1	0	1	1	0	1	1	0	1	1
75930	4930567H12Rik	0	0	0	0	0	1	1	0	1	1	0	1	1	0	1	1	0	1	1	0	1	1
619303	4930567H17Rik	0	0	0	0	0	1	1	0	1	1	0	1	1	0	1	1	0	1	1	0	1	1
78221	4930567J20Rik	0	0	0	0	0	1	1	0	1	1	0	1	1	0	1	1	0	1	1	0	1	1
78056	4930567K20Rik	0.182649	0	0.0872064	0.693255	0	1	1	0	1	1	0	1	1	0	1	1	0	1	1	0	1	1
75883	4930568A12Rik	0	0	0.00613385	0.0379175	0	1	1	0	1	1	0	1	1	0	1	1	0	1	1	0	1	1
75873	4930568B11Rik	0.147741	0	0.0564937	0.0475891	0	1	1	0	1	1	0	1	1	0	1	1	0	1	1	0	1	1
75859	4930568D16Rik	0	0	0	0	0	1	1	0	1	1	0	1	1	0	1	1	0	1	1	0	1	1
78219	4930568E12Rik	0	0	0	0	0	1	1	0	1	1	0	1	1	0	1	1	0	1	1	0	1	1
75857	4930568G15Rik	0	0	0.133591	0.306862	0	1	1	0	1	1	0	1	1	0	1	1	0	1	1	0	1	1
78812	4930570E03Rik	0	0	0	0	0	1	1	0	1	1	0	1	1	0	1	1	0	1	1	0	1	1
329782	4930570G19Rik	1.69147	0.96615	1.60001	3.04901	0.936491	0.117859	0.0535145	0.351797	0.342966	0.214035	-0.674954	0.14502	0.0692362	-0.584816	0.123918	0.0586981	-1.60871	0.00557544	0.00169944	-1.03007	0.00525853	0.00115821
75861	4930571K23Rik	0	0	0	0	0	1	1	0	1	1	0	1	1	0	1	1	0	1	1	0	1	1
78048	4930571O06Rik	0	0	0	0	0	1	1	0	1	1	0	1	1	0	1	1	0	1	1	0	1	1
75943	4930572G02Rik	0	0	0	0	0	1	1	0	1	1	0	1	1	0	1	1	0	1	1	0	1	1
75916	4930572K03Rik	0	0	0	0	0	1	1	0	1	1	0	1	1	0	1	1	0	1	1	0	1	1
381715	4930572O03Rik	0	0	0	0	0	1	1	0	1	1	0	1	1	0	1	1	0	1	1	0	1	1
75862	4930572O13Rik	0.260992	0	0.137856	0	0	1	1	0	1	1	0	1	1	0	1	1	0	1	1	0	1	1
75949	4930573C15Rik	0	0	0	0	0	1	1	0	1	1	0	1	1	0	1	1	0	1	1	0	1	1
78049	4930573O16Rik	0	0	0	0	0	1	1	0	1	1	0	1	1	0	1	1	0	1	1	0	1	1
67746	4930577N17Rik	0.372029	0.259093	0.26418	0.310063	0	1	1	0.00749605	0.993307	0.989617	-0.196969	0.847297	0.775059	-0.00677294	0.993518	0.989193	0	1	1	-0.20791	0.713042	0.61714
75905	4930578C19Rik	0.0363873	0	0.0134451	0	0	1	1	0	1	1	0	1	1	0	1	1	0	1	1	0	1	1
78058	4930578E11Rik	0	0	0.0092214	0	0	1	1	0	1	1	0	1	1	0	1	1	0	1	1	0	1	1
75952	4930578G10Rik	0.00655683	0	0	0	0	1	1	0	1	1	0	1	1	0	1	1	0	1	1	0	1	1
67750	4930578I06Rik	0	0	0	0	0	1	1	0	1	1	0	1	1	0	1	1	0	1	1	0	1	1
75929	4930578L24Rik	0.0342821	0	0.0933586	0.0539513	0	1	1	0	1	1	0	1	1	0	1	1	0	1	1	0	1	1
75951	4930578M01Rik	0.333494	0	0.107225	0.261075	0	1	1	0	1	1	0	1	1	0	1	1	0	1	1	0	1	1
78215	4930578N18Rik	0	0	0	0	0	1	1	0	1	1	0	1	1	0	1	1	0	1	1	0	1	1
319213	4930579C12Rik	0	0	0	0	0	1	1	0	1	1	0	1	1	0	1	1	0	1	1	0	1	1
75904	4930579D09Rik	0	0	0	0	0	1	1	0	1	1	0	1	1	0	1	1	0	1	1	0	1	1
67741	4930579F01Rik	0	0	0	0	0	1	1	0	1	1	0	1	1	0	1	1	0	1	1	0	1	1
75913	4930579G18Rik	1.03352	0.522308	0.58976	1.42836	1.11521	0.432698	0.301222	0.834987	0.341123	0.212632	-0.326888	0.731649	0.626502	-0.264186	0.731638	0.624652	-1.44265	0.0509936	0.0262038	-1.15219	0.00606099	0.00138567
75939	4930579G24Rik	0.372828	0.425419	0.267579	0.923703	0.00397318	0.996678	0.995411	0.267288	0.695442	0.577055	-1.15245	0.0848967	0.0341735	0.270033	0.73719	0.63089	-1.1564	0.125221	0.0777733	-1.409	0.00886691	0.00226765
75855	4930579H20Rik	0	0	0	0	0	1	1	0	1	1	0	1	1	0	1	1	0	1	1	0	1	1
75881	4930579K19Rik	0.0329368	0.603479	0.607945	0.860298	-2.68833	0.0480928	0.0169769	-2.27569	0.0477891	0.0160392	-2.63478	0.0449783	0.0150779	0.401257	0.545389	0.41381	0.0228699	0.978304	0.97014	-0.372951	0.536387	0.420999
75878	4930579P08Rik	0	0	0	0	0	1	1	0	1	1	0	1	1	0	1	1	0	1	1	0	1	1
78934	4930581F22Rik	0.213888	0.366697	0.119446	0.307844	0	1	1	1.09369	0.167001	0.0823319	-0.27313	0.770145	0.674909	0	1	1	0	1	1	-1.34127	0.0515581	0.021337
78057	4930583I09Rik	0	0	0	0	0	1	1	0	1	1	0	1	1	0	1	1	0	1	1	0	1	1
67745	4930583K01Rik	0	0	0	0	0	1	1	0	1	1	0	1	1	0	1	1	0	1	1	0	1	1
75946	4930583P06Rik	0.120298	0	0.337575	0.202366	0	1	1	0	1	1	0	1	1	0	1	1	0	1	1	0	1	1
75942	4930584F24Rik	0	0	0	0	0	1	1	0	1	1	0	1	1	0	1	1	0	1	1	0	1	1
75887	4930586N03Rik	0.324219	0	0.295938	0.155169	0	1	1	0	1	1	0	1	1	0	1	1	0	1	1	0	1	1
75893	4930587E11Rik	0.177963	0	0.478611	1.13437	0	1	1	-1.89518	0.0495636	0.0167882	-2.84668	0.0400229	0.0129599	-1.90631	0.00783042	0.00190051	-2.86004	0.0231518	0.0100335	-0.937202	0.235043	0.143829
67740	4930588J15Rik	0.199393	0	0.061013	0.786263	0	1	1	1.04967	0.411548	0.274722	-2.14214	0.0871674	0.0354455	0	1	1	-3.74542	0.00315151	0.000838137	-3.15273	0.00219463	0.000384323
619305	4930588K23Rik	0	0	0	0	0	1	1	0	1	1	0	1	1	0	1	1	0	1	1	0	1	1
75879	4930589L23Rik	0	0	0.0134886	0.0372159	0	1	1	0	1	1	0	1	1	0	1	1	0	1	1	0	1	1
381798	4930590J08Rik	0.0449311	0.175038	0.181949	0.131901	-1.58981	0.162459	0.0810225	-1.43441	0.132955	0.0610038	-1.46414	0.157579	0.0776966	0.163122	0.827364	0.745533	0.131383	0.853728	0.810347	-0.0364953	0.954453	0.933708
75852	4930590L14Rik	0	0	0	0	0	1	1	0	1	1	0	1	1	0	1	1	0	1	1	0	1	1
75910	4930590L20Rik	2.11524	0	0.478238	7.42912	2.99605	0.00240644	0.000417025	1.94838	0.00614999	0.00118187	-1.74294	0.00372758	0.000625024	0	1	1	-4.73502	8.28812e-06	5.31522e-07	-3.71422	3.52201e-06	1.11665e-07
68175	4930591A17Rik	0	0	0	0	0	1	1	0	1	1	0	1	1	0	1	1	0	1	1	0	1	1
75877	4930591E09Rik	0	0	0	0	0	1	1	0	1	1	0	1	1	0	1	1	0	1	1	0	1	1
75880	4930592A05Rik	0.218819	0	0.154056	0.147215	0	1	1	0	1	1	0	1	1	0	1	1	0	1	1	0	1	1
75853	4930592I03Rik	0.0312675	0	0.0555086	0.367087	0	1	1	0	1	1	0	1	1	0	1	1	0	1	1	0	1	1
71301	4930593A02Rik	0	0	0.104687	0.0669216	0	1	1	0	1	1	0	1	1	0	1	1	0	1	1	0	1	1
78060	4930593C16Rik	0.291102	0	0.0670559	0.263448	0	1	1	0	1	1	0	1	1	0	1	1	0	1	1	0	1	1
77633	4930594C11Rik	0.523217	0.212008	0.467387	1.16971	1.38911	0.316388	0.194836	0.417094	0.654375	0.524934	-1.21217	0.175343	0.0896395	-1.00535	0.243271	0.140155	-2.61527	0.0183403	0.00747165	-1.61217	0.0175852	0.00546319
654799	4930594M22Rik	0.160098	0	0.214224	1.36142	0	1	1	0	1	1	0	1	1	0	1	1	0	1	1	0	1	1
75947	4930594O21Rik	0	0	0	0	0	1	1	0	1	1	0	1	1	0	1	1	0	1	1	0	1	1
78062	4930595D18Rik	0.135777	0	0.0799798	0.582588	0	1	1	0	1	1	-0.93214	0.524823	0.390044	0	1	1	-1.53957	0.280577	0.205805	-1.89497	0.129287	0.0672417
78059	4930595L18Rik	0	0	0	0	0	1	1	0	1	1	0	1	1	0	1	1	0	1	1	0	1	1
245492	4930595M18Rik	0	0	0	0	0	1	1	0	1	1	0	1	1	0	1	1	0	1	1	0	1	1
239036	4930596D02Rik	0	0	0	0	0	1	1	0	1	1	0	1	1	0	1	1	0	1	1	0	1	1
78229	4930596I21Rik	0.984193	0.399866	0.721364	1.63497	0	1	1	1.19473	0.155024	0.0745944	-0.405163	0.667675	0.54688	0	1	1	-1.28861	0.152794	0.0988748	-1.60081	0.0334964	0.0123998
75389	4930597A21Rik	0	0	0	0	0	1	1	0	1	1	0	1	1	0	1	1	0	1	1	0	1	1
75377	4930597G03Rik	0	0	0	0	0	1	1	0	1	1	0	1	1	0	1	1	0	1	1	0	1	1
75381	4930598F16Rik	0	0	0	0	0	1	1	0	1	1	0	1	1	0	1	1	0	1	1	0	1	1
75379	4930599N23Rik	11.8395	6.01278	2.77543	2.81367	0.755786	0.144601	0.0694848	1.96568	0.000135347	1.02063e-05	2.14394	0.000570289	6.24304e-05	1.20711	0.000415421	5.31222e-05	1.39167	0.000572681	9.6936e-05	0.182014	0.599696	0.487139
70936	4931400O07Rik	0	0	0	0	0	1	1	0	1	1	0	1	1	0	1	1	0	1	1	0	1	1
70933	4931402G19Rik	0.132416	0	0.0895419	0.050227	0	1	1	0	1	1	0	1	1	0	1	1	0	1	1	0	1	1
70942	4931403E22Rik	21.8791	16.5925	28.2106	17.8741	0.434209	0.122084	0.055938	-0.39278	0.123921	0.0556693	0.199374	0.513099	0.377805	-0.825218	0.00553417	0.00123909	-0.22956	0.429105	0.345669	0.580976	0.0374045	0.0142285
70934	4931403G20Rik	0.975752	0.125248	0.328267	0.868934	2.54124	0.0205184	0.00581405	1.59751	0.0157247	0.00383576	0.23431	0.750516	0.650324	-0.938904	0.153608	0.0769785	-2.30849	0.00820801	0.00273996	-1.36688	0.0126908	0.00361259
74054	4931406B18Rik	0	0	0.0045044	0	0	1	1	0	1	1	0	1	1	0	1	1	0	1	1	0	1	1
70984	4931406C07Rik	2.33097	1.66006	1.40132	2.05549	0.21635	0.76364	0.669732	0.641811	0.133335	0.0612128	0.13236	0.807732	0.72267	0.4218	0.247796	0.143607	-0.0779495	0.859286	0.817726	-0.508936	0.0392712	0.015115
77592	4931406H21Rik	0.208379	0.0317847	0.0641376	0.478148	0.442911	0.790896	0.703558	1.18388	0.327429	0.201379	-1.66084	0.100457	0.042747	0.679918	0.496348	0.362391	-2.11972	0.0209403	0.00882689	-2.8194	0.000567553	6.71968e-05
233103	4931406P16Rik	2.04898	1.35742	1.4613	3.36817	0.754033	0.0803626	0.0327444	0.428321	0.161323	0.0786541	-0.630697	0.0999122	0.0424397	-0.32369	0.236395	0.134846	-1.3901	0.00141904	0.000307707	-1.06363	0.0012716	0.000190636
210940	4931408C20Rik	0	0	0	0	0	1	1	0	1	1	0	1	1	0	1	1	0	1	1	0	1	1
77059	4931408D14Rik	0.19745	0.0420275	0.36014	0.177644	-0.36976	0.861459	0.79412	-1.4568	0.244142	0.135932	-0.354966	0.8467	0.774407	-1.12305	0.153052	0.0765911	0.0172486	0.989333	0.984873	1.11481	0.127726	0.0662634
231045	4931409K22Rik	0	0	0	0	0	1	1	0	1	1	0	1	1	0	1	1	0	1	1	0	1	1
74359	4931414P19Rik	0.201003	0.243493	0.223731	0.165317	0	1	1	-0.753736	0.420003	0.282706	-0.326457	0.779667	0.686646	-0.593373	0.4965	0.362593	0	1	1	0.419259	0.44625	0.32972
66740	4931417E11Rik	0	0	0	0	0	1	1	0	1	1	0	1	1	0	1	1	0	1	1	0	1	1
70970	4931419H13Rik	0	0	0	0	0	1	1	0	1	1	0	1	1	0	1	1	0	1	1	0	1	1
70972	4931420L22Rik	0	0	0	0	0	1	1	0	1	1	0	1	1	0	1	1	0	1	1	0	1	1
70986	4931422A03Rik	1.36407	1.13866	0.947936	2.85506	0.304108	0.747869	0.64925	0.180046	0.775718	0.681155	-1.42676	0.0345762	0.0106957	-0.115285	0.823136	0.740213	-1.73845	0.00865357	0.00293555	-1.60855	0.000819103	0.000107986
70981	4931423N10Rik	0.36853	0.306799	0.337998	0.861813	0.506636	0.58989	0.460827	-0.0617152	0.922752	0.879675	-1.41745	0.0196847	0.00516014	-0.578872	0.426529	0.294323	-1.92597	0.0182626	0.00743751	-1.34551	0.0043052	0.000895217
74356	4931428F04Rik	2.21373	3.59263	2.84453	3.13689	-0.679596	0.0311934	0.00985666	-0.368655	0.162059	0.0791331	-0.495219	0.0914534	0.0377483	0.312271	0.127656	0.0609995	0.179415	0.407072	0.323306	-0.126042	0.523807	0.407979
70988	4931428L18Rik	0	0	0	0	0	1	1	0	1	1	0	1	1	0	1	1	0	1	1	0	1	1
74361	4931429L15Rik	0.0176276	0	0	0.0535697	0	1	1	0	1	1	0	1	1	0	1	1	0	1	1	0	1	1
70971	4931429P17Rik	0	0	0	0	0	1	1	0	1	1	0	1	1	0	1	1	0	1	1	0	1	1
74363	4931430N09Rik	2.5627	0.310618	0.397073	2.64455	2.86884	0.0634258	0.0241995	2.79867	0.00438634	0.000775865	0.104593	0.913691	0.870708	-0.0796627	0.923444	0.880168	-2.77164	0.0218211	0.00929954	-2.7071	0.00177809	0.000292991
70973	4931431B13Rik	0	0	0	0	0	1	1	0	1	1	0	1	1	0	1	1	0	1	1	0	1	1
74364	4931431C16Rik	0.290557	0.439244	0.225533	0.203081	-0.548335	0.599828	0.472836	0.276987	0.75118	0.648726	0.22322	0.823641	0.742929	0.804616	0.144709	0.0714202	0	1	1	-0.0422307	0.934359	0.904531
216622	4931440F15Rik	0.151548	0.0187272	0.0499285	0.448763	0	1	1	0	1	1	-1.20415	0.274841	0.16195	0	1	1	-1.50359	0.154271	0.10002	-2.49603	0.0100391	0.00266503
71000	4931440J10Rik	0.300937	0.0688134	0.0925712	0.266464	0	1	1	0	1	1	0	1	1	0	1	1	0	1	1	0	1	1
71004	4931440P22Rik	0.0405453	0.245314	0.0674321	0.0890367	0	1	1	0	1	1	0	1	1	0	1	1	0	1	1	0	1	1
237029	4932411N23Rik	0	0	0	0	0	1	1	0	1	1	0	1	1	0	1	1	0	1	1	0	1	1
75722	4932412D23Rik	0	0	0	0	0	1	1	0	1	1	0	1	1	0	1	1	0	1	1	0	1	1
319215	4932413F04Rik	1.20346	0.575352	0.0340164	0.472359	1.20695	0.285242	0.169981	4.76686	0.00062057	6.76204e-05	1.51382	0.116101	0.0517104	0	1	1	0.305774	0.660707	0.586703	-3.28029	0.000741887	9.44989e-05
237694	4932414J04Rik	0	0	0	0	0	1	1	0	1	1	0	1	1	0	1	1	0	1	1	0	1	1
75721	4932414N04Rik	0	0	0	0	0	1	1	0	1	1	0	1	1	0	1	1	0	1	1	0	1	1
211496	4932415M13Rik	0	0	0	0	0	1	1	0	1	1	0	1	1	0	1	1	0	1	1	0	1	1
654409	4932416H05Rik	0.799846	0.463319	0.811337	0.705156	0.245483	0.760877	0.666311	-0.417933	0.397845	0.261708	-0.409754	0.478776	0.343911	-0.652058	0.147604	0.0732025	-0.655083	0.180974	0.1213	0.0059712	0.98581	0.979706
442809	4932416K20Rik	0	0	0	0	0	1	1	0	1	1	0	1	1	0	1	1	0	1	1	0	1	1
245509	4932429P05Rik	0	0	0	0	0	1	1	0	1	1	0	1	1	0	1	1	0	1	1	0	1	1
619557	4932431L22Rik	0	0	0	0	0	1	1	0	1	1	0	1	1	0	1	1	0	1	1	0	1	1
114675	4932431P20Rik	0	0	0.0111503	0.0126718	0	1	1	0	1	1	0	1	1	0	1	1	0	1	1	0	1	1
319819	4932435O22Rik	0	0	0	0.0108659	0	1	1	0	1	1	0	1	1	0	1	1	0	1	1	0	1	1
229227	4932438A13Rik	12.4209	14.3342	13.7373	16.0283	-0.0360698	0.86834	0.803396	0.00736559	0.974706	0.959982	-0.295906	0.24795	0.141237	0.0391381	0.824704	0.742109	-0.262648	0.229427	0.161627	-0.303011	0.186564	0.10722
74387	4932438H23Rik	0.0268059	0.283983	0.0314774	0.0315269	0	1	1	0	1	1	0	1	1	0	1	1	0	1	1	0	1	1
319216	4932441J04Rik	0	0	0.11258	0.183054	0	1	1	0	1	1	0	1	1	0	1	1	0	1	1	0	1	1
403185	4932443I19Rik	0.00928393	0.132334	0.0188902	0	0	1	1	0	1	1	0	1	1	0	1	1	0	1	1	0	1	1
73326	4932702P03Rik	33.8479	92.665	36.0822	33.5353	-1.63891	0.000320091	3.51047e-05	-0.284039	0.48935	0.347666	-0.176346	0.633981	0.509448	1.34447	0.000109744	1.07895e-05	1.46252	5.14047e-06	2.94904e-07	0.108917	0.699952	0.601432
66747	4933400A11Rik	0	0	0	0	0	1	1	0	1	1	0	1	1	0	1	1	0	1	1	0	1	1
71052	4933400B14Rik	0	0	0	0	0	1	1	0	1	1	0	1	1	0	1	1	0	1	1	0	1	1
331003	4933400C23Rik	0	0	0	0	0	1	1	0	1	1	0	1	1	0	1	1	0	1	1	0	1	1
74403	4933400F21Rik	0.315411	0.389163	0.157638	1.3074	-0.00233983	0.998259	0.997777	1.09524	0.206222	0.108358	-2.01984	0.0684419	0.0257655	1.08147	0.0638911	0.0255405	-2.03622	0.0877301	0.0505757	-3.10908	0.00288004	0.000538413
71058	4933400L20Rik	0	0	0	0	0	1	1	0	1	1	0	1	1	0	1	1	0	1	1	0	1	1
71011	4933401B06Rik	0	0	0	0	0	1	1	0	1	1	0	1	1	0	1	1	0	1	1	0	1	1
71008	4933401D09Rik	0	0	0	0	0	1	1	0	1	1	0	1	1	0	1	1	0	1	1	0	1	1
71038	4933401H06Rik	0	0	0	0	0	1	1	0	1	1	0	1	1	0	1	1	0	1	1	0	1	1
71029	4933402C06Rik	0	0.122626	0	0	0	1	1	0	1	1	0	1	1	0	1	1	0	1	1	0	1	1
74426	4933402D24Rik	0.52219	0.434994	0.416681	0.507764	0.635766	0.571408	0.44052	0.348227	0.668472	0.541209	-0.233929	0.796965	0.708765	-0.337585	0.686533	0.571068	0	1	1	-0.560722	0.354461	0.243836
74437	4933402E13Rik	0	0	0	0	0	1	1	0	1	1	0	1	1	0	1	1	0	1	1	0	1	1
330820	4933402J07Rik	0	0	0	0	0	1	1	0	1	1	0	1	1	0	1	1	0	1	1	0	1	1
71057	4933402J10Rik	0	0	0	0	0	1	1	0	1	1	0	1	1	0	1	1	0	1	1	0	1	1
74425	4933402J15Rik	0	0	0	0	0	1	1	0	1	1	0	1	1	0	1	1	0	1	1	0	1	1
233918	4933402N03Rik	0	0	0	0	0	1	1	0	1	1	0	1	1	0	1	1	0	1	1	0	1	1
545732	4933402N22Rik	0	0	0	0	0	1	1	0	1	1	0	1	1	0	1	1	0	1	1	0	1	1
71030	4933403O08Rik	0	0	0.11443	0.310936	0	1	1	0	1	1	0	1	1	0	1	1	0	1	1	0	1	1
74066	4933404G15Rik	0	0	0	0	0	1	1	0	1	1	0	1	1	0	1	1	0	1	1	0	1	1
74061	4933404K08Rik	0	0	0	0.025778	0	1	1	0	1	1	0	1	1	0	1	1	0	1	1	0	1	1
71018	4933404K13Rik	0	0	0	0	0	1	1	0	1	1	0	1	1	0	1	1	0	1	1	0	1	1
66752	4933404O12Rik	0.946072	0.713969	1.20965	1.18826	0.363459	0.607574	0.481594	-0.531252	0.210705	0.111784	-0.447344	0.352448	0.226811	-0.884355	0.049628	0.0187329	-0.806862	0.0790396	0.0445509	0.0848199	0.779544	0.699026
74057	4933405D12Rik	0	0	0	0	0	1	1	0	1	1	0	1	1	0	1	1	0	1	1	0	1	1
71056	4933405E24Rik	0	0	0	0	0	1	1	0	1	1	0	1	1	0	1	1	0	1	1	0	1	1
71046	4933405L10Rik	0	0	0	0	0	1	1	0	1	1	0	1	1	0	1	1	0	1	1	0	1	1
243996	4933405O20Rik	0	0	0.215584	0.371722	0	1	1	0	1	1	0	1	1	0	1	1	0	1	1	-1.36918	0.193482	0.112143
71040	4933406B17Rik	0	0	0	0	0	1	1	0	1	1	0	1	1	0	1	1	0	1	1	0	1	1
74076	4933406C10Rik	0.159861	0	0.143703	0.221976	0	1	1	0	1	1	0	1	1	0	1	1	0	1	1	0	1	1
74065	4933406D12Rik	0	0	0	0	0	1	1	0	1	1	0	1	1	0	1	1	0	1	1	0	1	1
68308	4933406F09Rik	0	0	0	0	0	1	1	0	1	1	0	1	1	0	1	1	0	1	1	0	1	1
74059	4933406G16Rik	0	0	0	0	0	1	1	0	1	1	0	1	1	0	1	1	0	1	1	0	1	1
71045	4933406I18Rik	0.705963	0.299591	0.368036	0.41786	1.15817	0.247873	0.141066	0.915729	0.146768	0.0693043	0.470353	0.507729	0.372361	-0.229021	0.796532	0.707959	-0.690998	0.384481	0.301477	-0.454834	0.382646	0.269385
77800	4933406J10Rik	0.208242	0	0	0.241035	0	1	1	0	1	1	0	1	1	0	1	1	0	1	1	0	1	1
71033	4933406K04Rik	0	0	0	0	0	1	1	0	1	1	0	1	1	0	1	1	0	1	1	0	1	1
240755	4933406M09Rik	0	0	0	0	0	1	1	0	1	1	0	1	1	0	1	1	0	1	1	0	1	1
108809	4933407E24Rik	0	0	0	0	0	1	1	0	1	1	0	1	1	0	1	1	0	1	1	0	1	1
71125	4933407G14Rik	0	0	0	0	0	1	1	0	1	1	0	1	1	0	1	1	0	1	1	0	1	1
74072	4933407I05Rik	0	0	0	0	0	1	1	0	1	1	0	1	1	0	1	1	0	1	1	0	1	1
74396	4933407K13Rik	0.238599	0.0727574	0.108493	0.226541	1.01085	0.349889	0.224062	1.19978	0.123673	0.0554812	0.443859	0.638837	0.514504	0	1	1	-0.571861	0.504886	0.421164	-0.782462	0.247443	0.153593
71141	4933407L21Rik	0.0604754	0	0.271778	0	0	1	1	-1.23189	0.2792	0.162556	0	1	1	0	1	1	0	1	1	0	1	1
271508	4933408B17Rik	0	0	0.0656361	0.411514	0	1	1	0	1	1	-2.66065	0.110557	0.0484741	0	1	1	-1.16129	0.366661	0.284349	-1.75615	0.166627	0.0929146
74454	4933408J17Rik	0.25527	0.179614	0.292729	0.418163	0	1	1	-0.598804	0.501486	0.359845	0	1	1	-0.304917	0.722526	0.613876	0	1	1	-0.602434	0.323383	0.21649
71122	4933408N05Rik	0.0390152	0	0.131463	0.187378	0	1	1	0	1	1	0	1	1	0	1	1	0	1	1	0	1	1
74668	4933409F18Rik	0	0	0	0	0	1	1	0	1	1	0	1	1	0	1	1	0	1	1	0	1	1
227998	4933409G03Rik	0	0	0	0	0	1	1	0	1	1	0	1	1	0	1	1	0	1	1	0	1	1
108816	4933409K07Rik	0	0	0	0	0	1	1	0	1	1	0	1	1	0	1	1	0	1	1	0	1	1
71067	4933411E08Rik	0	0	0	0	0	1	1	0	1	1	0	1	1	0	1	1	0	1	1	0	1	1
71090	4933411G06Rik	0	0	0	0	0	1	1	0	1	1	0	1	1	0	1	1	0	1	1	0	1	1
66765	4933411K16Rik	0.0931665	0	0	0	0	1	1	0	1	1	0	1	1	0	1	1	0	1	1	0	1	1
71086	4933412E12Rik	1.54826	0	0.518522	0.111426	3.77492	0.00124432	0.000186128	1.35663	0.0366419	0.0113842	3.03766	0.00163294	0.000227364	-2.38435	0.00570207	0.00128303	0	1	1	1.65267	0.0362667	0.0136744
71088	4933412E24Rik	0	0	0	0	0	1	1	0	1	1	0	1	1	0	1	1	0	1	1	0	1	1
71071	4933412O06Rik	2.99007	0	0.503037	1.25257	3.80095	0.00103429	0.000148723	3.03185	0.000318095	2.95211e-05	1.2712	0.0367057	0.0116149	-0.793675	0.41738	0.285986	-2.54116	0.00551311	0.0016763	-1.75981	0.0156776	0.00471135
71106	4933413J09Rik	0	0	0.0289921	0.118782	0	1	1	0	1	1	0	1	1	0	1	1	0	1	1	0	1	1
71100	4933413L06Rik	0.0544852	0.412044	0.445006	1.61145	0	1	1	-1.90799	0.0884337	0.0359549	-3.92596	0.00886267	0.00187391	0.32814	0.642112	0.520272	-1.71342	0.0901835	0.0523535	-2.05828	0.0125814	0.00357365
66755	4933415F23Rik	0	0	0	0	0	1	1	0	1	1	0	1	1	0	1	1	0	1	1	0	1	1
619332	4933416C03Rik	0.0336674	0	0.0696866	0.201484	0	1	1	0	1	1	0	1	1	0	1	1	0	1	1	0	1	1
71081	4933416E03Rik	0	0	0	0	0	1	1	0	1	1	0	1	1	0	1	1	0	1	1	0	1	1
71159	4933416I08Rik	0	0	0	0	0	1	1	0	1	1	0	1	1	0	1	1	0	1	1	0	1	1
71174	4933416M06Rik	0	0	0	0	0	1	1	0	1	1	0	1	1	0	1	1	0	1	1	0	1	1
71082	4933416M07Rik	0	0	0.0127367	0	0	1	1	0	1	1	0	1	1	0	1	1	0	1	1	0	1	1
67550	4933416O17Rik	0	0	0	0	0	1	1	0	1	1	0	1	1	0	1	1	0	1	1	0	1	1
66761	4933417A18Rik	0	0	0	0	0	1	1	0	1	1	0	1	1	0	1	1	0	1	1	0	1	1
71186	4933417D19Rik	0.167952	0	0.0980087	0.179125	0	1	1	0	1	1	0	1	1	0	1	1	0	1	1	0	1	1
71134	4933417E11Rik	0	0	0	0	0	1	1	0	1	1	0	1	1	0	1	1	0	1	1	0	1	1
71182	4933417G07Rik	0.150563	0	0.0733661	1.07732	0	1	1	0	1	1	-2.32612	0.0336058	0.0103148	0	1	1	-2.30582	0.00741919	0.00242308	-3.64103	0.000389805	4.13725e-05
71153	4933417O13Rik	0	0	0.033222	0	0	1	1	0	1	1	0	1	1	0	1	1	0	1	1	0	1	1
71162	4933421I07Rik	0	0	0	0	0	1	1	0	1	1	0	1	1	0	1	1	0	1	1	0	1	1
100504166	4933421O10Rik	1.40871	0.934174	0.959666	1.45907	0.628968	0.415418	0.284553	0.585749	0.256874	0.145947	-0.0538233	0.926937	0.888592	-0.0431349	0.943908	0.911427	-0.681552	0.0929536	0.0542727	-0.640382	0.0476389	0.0193016
71133	4933422A05Rik	0	0	0	0.0546085	0	1	1	0	1	1	0	1	1	0	1	1	0	1	1	0	1	1
74456	4933424G05Rik	0.731472	0.0351363	0.159901	0.517353	2.67065	0.0223591	0.0064625	2.22629	0.0179893	0.00454522	1.02978	0.180367	0.0928355	0	1	1	0	1	1	-1.21521	0.129365	0.0673073
71166	4933424G06Rik	0	0	0.162394	0.262986	0	1	1	-1.11557	0.443125	0.304176	0	1	1	0	1	1	0	1	1	0	1	1
67548	4933424M12Rik	0	0	0	0	0	1	1	0	1	1	0	1	1	0	1	1	0	1	1	0	1	1
74458	4933425B07Rik	0	0	0	0	0	1	1	0	1	1	0	1	1	0	1	1	0	1	1	0	1	1
66763	4933425L06Rik	0	0	0.00914872	0	0	1	1	0	1	1	0	1	1	0	1	1	0	1	1	0	1	1
232217	4933427D06Rik	0	0	0	0	0	1	1	0	1	1	0	1	1	0	1	1	0	1	1	0	1	1
74477	4933427D14Rik	1.90912	0.627815	1.50345	2.87059	1.90448	0.0170884	0.00459966	0.55463	0.173809	0.0870013	-0.450511	0.347064	0.222316	-1.3344	0.00300678	0.000584919	-2.35899	0.000344723	5.07126e-05	-1.00748	0.00343814	0.000670852
66769	4933427E11Rik	0	0	0.0742705	0.126516	0	1	1	0	1	1	0	1	1	0	1	1	0	1	1	0	1	1
71234	4933427E13Rik	0	0	0	0	0	1	1	0	1	1	0	1	1	0	1	1	0	1	1	0	1	1
330053	4933427G23Rik	0	0	0.0500556	0	0	1	1	0	1	1	0	1	1	0	1	1	0	1	1	0	1	1
71235	4933427I22Rik	0	0	0	0.0238796	0	1	1	0	1	1	0	1	1	0	1	1	0	1	1	0	1	1
71293	4933428C19Rik	0	0	0.0189714	0	0	1	1	0	1	1	0	1	1	0	1	1	0	1	1	0	1	1
100141474	4933428G20Rik	0.712135	0.181123	0.35968	1.45792	1.76073	0.108855	0.0482709	1.42683	0.0661434	0.0245376	-0.646301	0.362343	0.235222	-0.297348	0.697268	0.584307	-2.40482	0.00212703	0.000511639	-2.08991	0.000590509	7.06095e-05
71248	4933428M09Rik	0	0	0	0	0	1	1	0	1	1	0	1	1	0	1	1	0	1	1	0	1	1
71232	4933429K18Rik	0	0	0	0	0	1	1	0	1	1	0	1	1	0	1	1	0	1	1	0	1	1
66770	4933429O19Rik	0	0	0	0	0	1	1	0	1	1	0	1	1	0	1	1	0	1	1	0	1	1
71285	4933430H16Rik	0	0	0	0	0	1	1	0	1	1	0	1	1	0	1	1	0	1	1	0	1	1
214106	4933430I17Rik	0.0410199	0.224006	0.0691152	0.426653	0	1	1	0	1	1	-2.88646	0.0139911	0.00331382	0	1	1	-0.828392	0.328923	0.249219	-2.60978	0.00373827	0.000745386
71316	4933430M04Rik	0	0	0.0265596	0	0	1	1	0	1	1	0	1	1	0	1	1	0	1	1	0	1	1
71249	4933430N04Rik	0	0	0	0	0	1	1	0	1	1	0	1	1	0	1	1	0	1	1	0	1	1
329735	4933431E20Rik	8.64512	6.68617	7.93641	5.62239	0.292187	0.279741	0.165847	0.0947878	0.698166	0.581373	0.569385	0.0314854	0.00948849	-0.19506	0.193168	0.103769	0.280399	0.0938539	0.0548945	0.475414	0.00491959	0.00106379
71265	4933431G14Rik	0.626258	0	0.218146	0.899771	1.23397	0.493833	0.361039	0.791768	0.549609	0.411084	-0.986026	0.392233	0.26223	-0.475024	0.675492	0.558387	-2.22614	0.020785	0.00874583	-1.79359	0.0185231	0.00586926
71298	4933431J24Rik	0	0	0	0	0	1	1	0	1	1	0	1	1	0	1	1	0	1	1	0	1	1
71196	4933432G23Rik	0	0	0	0	0	1	1	0	1	1	0	1	1	0	1	1	0	1	1	0	1	1
71264	4933432I03Rik	0.327388	0	0.339076	0.386811	0	1	1	0.532108	0.714977	0.602144	-0.103876	0.944674	0.913581	-0.210805	0.870517	0.804432	0	1	1	-0.617054	0.579115	0.464827
66779	4933432I09Rik	0.27141	0	0.0154621	0.0950372	0	1	1	0	1	1	0	1	1	0	1	1	0	1	1	0	1	1
75793	4933432K03Rik	0	0	0	0	0	1	1	0	1	1	0	1	1	0	1	1	0	1	1	0	1	1
71314	4933433F19Rik	0	0	0	0	0	1	1	0	1	1	0	1	1	0	1	1	0	1	1	0	1	1
66785	4933433G08Rik	0	0	0	0	0	1	1	0	1	1	0	1	1	0	1	1	0	1	1	0	1	1
71274	4933433G15Rik	0	0	0.127924	0.202297	0	1	1	0	1	1	0	1	1	0	1	1	0	1	1	0	1	1
71226	4933433G19Rik	1.97693	1.24398	1.73506	1.25614	0.885033	0.203957	0.108509	0.405508	0.420612	0.283299	0.782981	0.171671	0.0870678	-0.474859	0.320244	0.200349	-0.102917	0.83064	0.781796	0.371205	0.328691	0.221244
74473	4933433H22Rik	0	0	0	0	0	1	1	0	1	1	0	1	1	0	1	1	0	1	1	0	1	1
71252	4933433N18Rik	0	0	0	0	0	1	1	0	1	1	0	1	1	0	1	1	0	1	1	0	1	1
99650	4933434E20Rik	2.02897	2.32897	2.14795	2.58972	-0.210326	0.58215	0.45246	-0.0632852	0.838474	0.764188	-0.194445	0.607748	0.479477	0.147374	0.549792	0.418732	0.0129343	0.970219	0.959749	-0.138024	0.582569	0.468609
71209	4933436E23Rik	0	0	0	0	0	1	1	0	1	1	0	1	1	0	1	1	0	1	1	0	1	1
71244	4933436H12Rik	0	0	0	0	0	1	1	0	1	1	0	1	1	0	1	1	0	1	1	0	1	1
66780	4933436I01Rik	0	0	0	0	0	1	1	0	1	1	0	1	1	0	1	1	0	1	1	0	1	1
71290	4933436I20Rik	0	0	0	0	0	1	1	0	1	1	0	1	1	0	1	1	0	1	1	0	1	1
71247	4933438B17Rik	0	0	0	0	0	1	1	0	1	1	0	1	1	0	1	1	0	1	1	0	1	1
71270	4933438K21Rik	0	0	0	0	0	1	1	0	1	1	0	1	1	0	1	1	0	1	1	0	1	1
74476	4933439C10Rik	0.300476	0.432257	0.304539	0.942459	0	1	1	-0.586181	0.464824	0.3243	-2.15474	0.0070996	0.00140846	0.537057	0.317721	0.198354	-1.04425	0.0319383	0.0147695	-1.57951	0.000764665	9.88208e-05
71319	4933439K11Rik	0	0	0	0	0	1	1	0	1	1	0	1	1	0	1	1	0	1	1	0	1	1
71321	4933440J02Rik	0	0	0	0	0	1	1	0	1	1	0	1	1	0	1	1	0	1	1	0	1	1
71208	4933440M02Rik	0	0	0	0	0	1	1	0	1	1	0	1	1	0	1	1	0	1	1	0	1	1
74471	4933440N22Rik	0.40052	0.0573552	0.161308	0.120092	1.39068	0.239257	0.134523	1.07772	0.159204	0.0772827	1.50585	0.117156	0.0523574	0	1	1	0	1	1	0	1	1
381622	5031410I06Rik	0	0	0	0	0	1	1	0	1	1	0	1	1	0	1	1	0	1	1	0	1	1
269630	5031425E22Rik	1.98582	1.18554	1.28943	2.2065	0.525918	0.539934	0.407956	0.709234	0.209139	0.110526	-0.201967	0.778934	0.685558	0.187378	0.627047	0.502928	-0.728674	0.154796	0.100466	-0.911954	0.0207573	0.00678671
319684	5031425F14Rik	0.107798	0	0.00948572	0	0	1	1	0	1	1	0	1	1	0	1	1	0	1	1	0	1	1
68144	5031426D15Rik	2.06044	0.154574	0.434277	0.329907	4.71611	0.0480684	0.0169616	2.84435	0.00587508	0.0011174	3.93637	0.0156492	0.00382758	-1.82234	0.0461259	0.0171328	-0.78491	0.487129	0.403224	1.07676	0.192873	0.11169
100503613	5031434C07Rik	0	0	0.00733395	0	0	1	1	0	1	1	0	1	1	0	1	1	0	1	1	0	1	1
100039684	5031434O11Rik	0.638767	0	0.292317	0.766397	0	1	1	0	1	1	0	1	1	0	1	1	0	1	1	0	1	1
223739	5031439G07Rik	3.86419	0.693878	1.40197	2.78017	2.29874	0.000164289	1.55037e-05	1.61669	3.73836e-05	2.06453e-06	0.661326	0.0340395	0.0104793	-0.680739	0.105579	0.0478212	-1.63907	0.000416205	6.40689e-05	-0.94553	0.00180919	0.000300356
75958	5033403F01Rik	0.0289428	0	0.0337263	0.137039	0	1	1	0	1	1	-1.55619	0.295712	0.179202	0	1	1	0	1	1	0	1	1
75954	5033403H07Rik	0	0	0	0	0	1	1	0	1	1	0	1	1	0	1	1	0	1	1	0	1	1
114668	5033404E19Rik	0	0	0	0	0	1	1	0	1	1	0	1	1	0	1	1	0	1	1	0	1	1
77675	5033406O09Rik	0	0	0.0318023	0.176007	0	1	1	0	1	1	0	1	1	0	1	1	0	1	1	0	1	1
75995	5033417F24Rik	1.08442	2.05064	1.35621	1.39273	-0.901923	0.0725274	0.028637	-0.306977	0.52182	0.381317	-0.217701	0.70953	0.598179	0.598313	0.0905258	0.0393266	0.684186	0.0937647	0.0548167	0.0828619	0.846556	0.782811
75990	5033421B08Rik	0.121702	0	0	0.886459	0	1	1	0	1	1	-2.00091	0.0678348	0.0254947	0	1	1	-2.56239	0.00764349	0.00251094	-4.4454	0.000293587	2.8797e-05
76005	5033426E14Rik	0	0	0	0	0	1	1	0	1	1	0	1	1	0	1	1	0	1	1	0	1	1
76001	5033426O07Rik	0	0	0	0	0	1	1	0	1	1	0	1	1	0	1	1	0	1	1	0	1	1
75996	5033428I22Rik	0	0	0	0	0	1	1	0	1	1	0	1	1	0	1	1	0	1	1	0	1	1
76000	5033430I15Rik	0.279814	0.535758	0.470909	0.58148	0	1	1	-0.543489	0.514906	0.374096	0	1	1	0.749431	0.227653	0.128233	0	1	1	-0.252147	0.642976	0.536033
76676	5330411J11Rik	0	0	0	0	0	1	1	0	1	1	0	1	1	0	1	1	0	1	1	0	1	1
414081	5330413P13Rik	0.284008	0.384967	0.317667	0.0321515	-0.866317	0.536322	0.403785	-0.814819	0.422686	0.285271	2.17651	0.162243	0.0807839	0.101643	0.891967	0.835609	0	1	1	2.98672	0.000437914	4.79702e-05
403201	5330416C01Rik	0.142337	0	0	0	0	1	1	0	1	1	0	1	1	0	1	1	0	1	1	0	1	1
229722	5330417C22Rik	5.99111	3.89584	5.51354	4.56175	0.701355	0.00587659	0.0012369	0.159082	0.443872	0.304929	0.492295	0.0225814	0.00615015	-0.54163	0.0162144	0.00467504	-0.211674	0.304435	0.226964	0.340367	0.073354	0.0331953
383820	5330432E05Rik	0	0	0	0	0	1	1	0	1	1	0	1	1	0	1	1	0	1	1	0	1	1
100043213	5330434G04Rik	4.24131	4.01927	5.7722	24.3823	0.220521	0.784251	0.695214	-0.43052	0.428575	0.290944	-2.45745	0.00120992	0.000154501	-0.635792	0.02355	0.007389	-2.68683	0.000129391	1.54735e-05	-2.05314	0.000122186	9.60145e-06
327824	5330438D12Rik	0.472614	0.75955	0.630028	0.936852	-0.427394	0.550887	0.4187	-0.0367269	0.953851	0.927099	-0.587786	0.283728	0.169716	0.387779	0.468042	0.333983	-0.156588	0.762139	0.6997	-0.557057	0.131537	0.0688028
77103	5330439A09Rik	0.0335825	0	0.0277863	0.219367	0	1	1	0	1	1	0	1	1	0	1	1	0	1	1	0	1	1
321015	5330439B14Rik	0	0	0	0	0	1	1	0	1	1	0	1	1	0	1	1	0	1	1	0	1	1
71392	5430401F13Rik	0	0	0	0	0	1	1	0	1	1	0	1	1	0	1	1	0	1	1	0	1	1
100504461	5430401H09Rik	0	0	0.00465969	0.0156903	0	1	1	0	1	1	0	1	1	0	1	1	0	1	1	0	1	1
71351	5430402E10Rik	0	0	0	0	0	1	1	0	1	1	0	1	1	0	1	1	0	1	1	0	1	1
73183	5430402O13Rik	0.418914	0	0.254797	0.735344	0	1	1	1.15073	0.203065	0.106225	-0.330105	0.714107	0.604275	0	1	1	-1.85535	0.0135036	0.00510928	-1.46098	0.0367255	0.0139133
330737	5430403N17Rik	0	0	0.0192316	0	0	1	1	0	1	1	0	1	1	0	1	1	0	1	1	0	1	1
74487	5430405H02Rik	0.201691	0.49704	0.36208	0.433525	0	1	1	-0.247249	0.762489	0.663715	-0.525919	0.626613	0.499894	0.742733	0.250632	0.145809	0	1	1	-0.285982	0.731944	0.639935
100503199	5430416N02Rik	3.57116	1.92942	2.96746	3.90284	0.541661	0.619803	0.496073	0.111092	0.887574	0.830094	-0.76898	0.296389	0.17978	-0.428678	0.470855	0.336823	-1.31005	0.0399404	0.0194301	-0.87435	0.0346969	0.0129385
71395	5430419D17Rik	0	0	0	0	0	1	1	0	1	1	0	1	1	0	1	1	0	1	1	0	1	1
74489	5430421F17Rik	0	0	0	0	0	1	1	0	1	1	0	1	1	0	1	1	0	1	1	0	1	1
71416	5430425K12Rik	0	0	0	0	0	1	1	0	1	1	0	1	1	0	1	1	0	1	1	0	1	1
71349	5430427M07Rik	0	0	0	0	0	1	1	0	1	1	0	1	1	0	1	1	0	1	1	0	1	1
71398	5430427O19Rik	0.134138	0	0.0112411	0.0238364	0	1	1	0	1	1	0	1	1	0	1	1	0	1	1	0	1	1
71422	5430428K19Rik	0.0341383	0	0	0	0	1	1	0	1	1	0	1	1	0	1	1	0	1	1	0	1	1
71368	5430431A17Rik	0.123277	0	0	0	0	1	1	0	1	1	0	1	1	0	1	1	0	1	1	0	1	1
71342	5430434I15Rik	0	0	0	0	0	1	1	0	1	1	0	1	1	0	1	1	0	1	1	0	1	1
71432	5430437J10Rik	0	0	0.0166036	0.0855387	0	1	1	0	1	1	0	1	1	0	1	1	0	1	1	0	1	1
71362	5430440P10Rik	0	0	0	0.0363835	0	1	1	0	1	1	0	1	1	0	1	1	0	1	1	0	1	1
232426	5530400C23Rik	0	0	0	0	0	1	1	0	1	1	0	1	1	0	1	1	0	1	1	0	1	1
71388	5530401A14Rik	0.0916591	0.0333584	0.398929	0.875552	0	1	1	-1.83417	0.0872562	0.0353465	-3.34829	0.0050427	0.000907864	-1.08338	0.199427	0.107929	-2.62829	0.00580129	0.00178135	-1.54742	0.0180838	0.00568391
71445	5530601H04Rik	1.08402	0.703805	1.21376	2.89988	0.620822	0.436501	0.304982	0.0170163	0.977225	0.963914	-1.40714	0.0440954	0.0146929	-0.60161	0.186236	0.0988487	-2.02796	0.016452	0.00651568	-1.4286	0.0084586	0.00212841
70487	5730403I07Rik	0	0	0	0	0	1	1	0	1	1	0	1	1	0	1	1	0	1	1	0	1	1
70489	5730405O15Rik	0.877219	1.4549	1.08754	2.70623	-0.980392	0.261787	0.15188	-0.430532	0.59382	0.458878	-1.73581	0.0306924	0.00916659	0.533539	0.327367	0.206565	-0.760664	0.169004	0.111707	-1.29982	0.0102692	0.00274327
67531	5730408K05Rik	0	0	0.0404131	0.305258	0	1	1	0	1	1	0	1	1	0	1	1	0	1	1	0	1	1
230757	5730409E04Rik	9.38452	17.547	10.209	9.9773	-0.910229	0.00348899	0.000654892	-0.320706	0.286959	0.168759	-0.114766	0.750363	0.65005	0.58475	0.00567484	0.00127427	0.799993	0.0015471	0.000342299	0.219144	0.401474	0.287389
70494	5730409K12Rik	0.957029	0.577586	1.71628	1.59262	0.802452	0.0613976	0.0232437	-0.900618	0.00527393	0.000975965	-0.83194	0.019954	0.00525211	-1.70383	0.000366561	4.54808e-05	-1.63814	0.00138404	0.000297943	0.0756387	0.811147	0.736407
70491	5730412P04Rik	0.0363497	0	0.0142792	0.055568	0	1	1	0	1	1	0	1	1	0	1	1	0	1	1	0	1	1
70550	5730416F02Rik	0	0	0	0	0	1	1	0	1	1	0	1	1	0	1	1	0	1	1	0	1	1
70537	5730419F03Rik	0	0	0	0	0	1	1	0	1	1	0	1	1	0	1	1	0	1	1	0	1	1
70523	5730420D15Rik	0	0	0.0727779	0.253442	0	1	1	0	1	1	0	1	1	0	1	1	0	1	1	0	1	1
433966	5730422E09Rik	0.101271	0	0.0455902	0.195754	0	1	1	0	1	1	0	1	1	0	1	1	0	1	1	0	1	1
70538	5730435O14Rik	0	0	0	0	0	1	1	0	1	1	0	1	1	0	1	1	0	1	1	0	1	1
70591	5730455P16Rik	10.7608	10.8158	10.7431	10.3152	-0.214153	0.330973	0.207697	-0.151345	0.477123	0.336013	0.0409185	0.869794	0.807294	0.0638755	0.739796	0.634033	0.258816	0.139582	0.088733	0.190849	0.284433	0.18351
70594	5730460C07Rik	0	0	0	0	0	1	1	0	1	1	0	1	1	0	1	1	0	1	1	0	1	1
70592	5730480H06Rik	4.56605	3.3788	3.67299	6.23355	0.240181	0.588434	0.459528	0.215691	0.510152	0.369285	-0.618171	0.0464419	0.0156643	-0.0254732	0.950863	0.921758	-0.852917	0.00820801	0.00274011	-0.828509	0.00135652	0.000206893
70602	5730488B01Rik	0	0	0	0	0	1	1	0	1	1	0	1	1	0	1	1	0	1	1	0	1	1
236366	5730507C01Rik	0	0	0.00934294	0	0	1	1	0	1	1	0	1	1	0	1	1	0	1	1	0	1	1
70626	5730522E02Rik	1.17376	0.339605	0.581586	0.498528	2.15315	0.100843	0.0436752	0.795539	0.25259	0.142512	0.81419	0.312495	0.193275	-1.28302	0.133721	0.0647612	0	1	1	0.023056	0.962611	0.946159
67313	5730559C18Rik	0.0560585	0	0.0286677	0.0370875	0	1	1	0	1	1	0	1	1	0	1	1	0	1	1	0	1	1
77580	5730596B20Rik	0	0	0	0	0	1	1	0	1	1	0	1	1	0	1	1	0	1	1	0	1	1
74750	5830410O09Rik	0	0	0	0	0	1	1	0	1	1	0	1	1	0	1	1	0	1	1	0	1	1
244234	5830411N06Rik	0	0	0	0	0	1	1	0	1	1	0	1	1	0	1	1	0	1	1	0	1	1
74757	5830416I19Rik	0	0	0.0149309	0.0141002	0	1	1	0	1	1	0	1	1	0	1	1	0	1	1	0	1	1
100302730	5830417I10Rik	1.16475	0.875185	0.858654	1.38779	0.581523	0.239383	0.134633	0.415738	0.211224	0.112138	-0.355765	0.368654	0.240864	-0.164651	0.583619	0.454861	-0.943166	0.0125812	0.00469412	-0.775018	0.00436329	0.000913512
100529079	5830418P13Rik	0.0230649	0	0	0	0	1	1	0	1	1	0	1	1	0	1	1	0	1	1	0	1	1
76062	5830428M24Rik	0	0	0	0	0	1	1	0	1	1	0	1	1	0	1	1	0	1	1	0	1	1
67765	5830432E09Rik	2.87645	3.07928	0.604916	2.04012	-0.160911	0.767617	0.674754	2.31533	0.000145672	1.11112e-05	0.436055	0.334438	0.211676	2.47502	6.54498e-07	1.99998e-08	0.596238	0.0606457	0.0322778	-1.88054	1.71727e-05	8.15622e-07
76030	5830433I10Rik	0	0	0.0506575	0	0	1	1	0	1	1	0	1	1	0	1	1	0	1	1	0	1	1
641454	5830444B04Rik	0.216002	0.174769	0.236692	0.0741009	-0.326742	0.832605	0.754492	-0.490593	0.655604	0.526285	1.37206	0.362653	0.23557	-0.140638	0.873037	0.807289	0	1	1	1.87588	0.0402967	0.0156181
76100	5830454E08Rik	0.415542	0.626304	0.44043	0.245303	0	1	1	0	1	1	0	1	1	0	1	1	0	1	1	0	1	1
622307	5830473C10Rik	0	0	0	0	0	1	1	0	1	1	0	1	1	0	1	1	0	1	1	0	1	1
320939	5930403L14Rik	0.722935	0.56192	0.259568	0.308511	0.471015	0.580837	0.450993	1.74305	0.0139647	0.00329836	1.75023	0.048936	0.0167934	1.26729	0.0686593	0.0279011	1.26472	0.131505	0.0825207	0.0118347	0.988996	0.984586
100040846	5930403N24Rik	0.696387	0.0794386	0.714325	0.928271	2.34107	0.0219052	0.00629659	-0.342442	0.440402	0.301816	-0.740805	0.166102	0.0834385	-2.63876	0.00136172	0.00022438	-3.07993	0.00306048	0.000810164	-0.398805	0.300213	0.196757
319616	5930412G12Rik	0	0	0.00804982	0	0	1	1	0	1	1	0	1	1	0	1	1	0	1	1	0	1	1
319688	5930422O12Rik	0.607753	0.477723	0.319061	0.799088	-0.119367	0.943829	0.911588	0.257458	0.81401	0.732619	-1.01632	0.352879	0.227175	0.328861	0.637367	0.514715	-0.903884	0.276818	0.2025	-1.26279	0.0272223	0.00951239
319982	5930430L01Rik	2.0896	0.470148	0.557283	1.1149	2.00053	0.0066608	0.00143712	2.25352	6.81125e-05	4.35613e-06	0.976094	0.026345	0.00749747	0.254228	0.651971	0.530739	-1.02251	0.0360151	0.0170753	-1.28392	0.0014232	0.000220147
328324	5930438M14Rik	0	0	0.146444	0	0	1	1	0	1	1	0	1	1	0	1	1	0	1	1	0	1	1
109198	6030407O03Rik	0	0	0	0	0	1	1	0	1	1	0	1	1	0	1	1	0	1	1	0	1	1
77717	6030408B16Rik	0	0	0	0	0	1	1	0	1	1	0	1	1	0	1	1	0	1	1	0	1	1
319477	6030419C18Rik	6.08496	5.02284	2.67599	3.9407	0.229731	0.405289	0.274569	1.12529	0.000349504	3.32799e-05	0.705559	0.0171252	0.00431797	0.894251	0.00294927	0.000571219	0.471654	0.081728	0.0463844	-0.40844	0.148498	0.0803502
77878	6030440G07Rik	0	0	0	0	0	1	1	0	1	1	0	1	1	0	1	1	0	1	1	0	1	1
77880	6030442E23Rik	0	0	0	0	0	1	1	0	1	1	0	1	1	0	1	1	0	1	1	0	1	1
320719	6030443J06Rik	0.168794	0.0845083	0.178385	0.258235	0	1	1	-0.284544	0.821096	0.74164	-0.990866	0.444195	0.310219	-0.686294	0.368454	0.242706	-1.35973	0.148283	0.0955117	-0.669483	0.260871	0.164415
330837	6030452D12Rik	0	0	0	0	0	1	1	0	1	1	0	1	1	0	1	1	0	1	1	0	1	1
77877	6030458C11Rik	5.39942	3.36482	3.38006	3.31427	0.632706	0.0241799	0.00711046	0.746061	0.00406743	0.000706361	0.723089	0.00808211	0.00165842	0.117677	0.616417	0.49016	0.0851202	0.685377	0.613104	-0.0305078	0.895299	0.850781
234863	6030466F02Rik	0	0	0	0	0	1	1	0	1	1	0	1	1	0	1	1	0	1	1	0	1	1
77727	6030468B19Rik	0	0	0	0	0	1	1	0	1	1	0	1	1	0	1	1	0	1	1	0	1	1
100043065	6030469F06Rik	0	0	0	0	0	1	1	0	1	1	0	1	1	0	1	1	0	1	1	0	1	1
77883	6030498E09Rik	0	0	0.029774	0	0	1	1	0	1	1	0	1	1	0	1	1	0	1	1	0	1	1
76133	6230400D17Rik	1.47111	0.695332	1.33639	2.11224	0.744955	0.355791	0.229411	0.133526	0.821527	0.742425	-0.719846	0.191682	0.100698	-0.624912	0.197667	0.106691	-1.46977	0.00495516	0.00146773	-0.844944	0.0123118	0.0034667
103712	6330403K07Rik	60.3164	9.5854	98.9694	45.7787	2.34791	0.000153104	1.42582e-05	-0.783536	0.0168735	0.00419748	0.496715	0.216366	0.118089	-3.12025	4.09386e-09	2.92476e-11	-1.83591	0.0002042	2.68325e-05	1.28387	0.00021696	1.96412e-05
70720	6330407A03Rik	0.0371915	0	0	0.0199814	0	1	1	0	1	1	0	1	1	0	1	1	0	1	1	0	1	1
70730	6330409D20Rik	0.0674306	2.36141	0.684298	0.43795	-4.53494	2.19806e-05	1.31913e-06	-2.7818	0.00130521	0.000172483	0	1	1	1.75392	0.000218578	2.45128e-05	2.45947	0.000217953	2.91458e-05	0.707426	0.191676	0.110882
319224	6330410L21Rik	0	0	0.0597652	0	0	1	1	0	1	1	0	1	1	0	1	1	0	1	1	0	1	1
70725	6330411D24Rik	0	1.96754	0.0577987	0.233493	-5.35921	5.53232e-05	4.03855e-06	0	1	1	0	1	1	4.89679	2.34471e-06	9.52822e-08	3.33154	0.00077997	0.00014404	0	1	1
70753	6330415B21Rik	2.28265	1.38172	1.18096	7.05706	0.338785	0.741528	0.64216	0.86815	0.195675	0.101225	-1.72795	0.0562749	0.0201565	0.535111	0.33885	0.216705	-2.07364	0.0487267	0.024786	-2.59726	0.00200308	0.000341723
69004	6330418K02Rik	1.46654	0.966343	1.3068	1.29175	-0.284365	0.849007	0.777064	-0.506532	0.626036	0.493247	-0.544476	0.650169	0.526638	-0.207461	0.748202	0.64463	-0.26321	0.711556	0.642354	-0.0371179	0.947727	0.922902
319551	6330420H09Rik	0.701292	0	0.0932339	0	1.79847	0.260437	0.150783	1.72991	0.222842	0.120789	3.11192	0.0475959	0.0162074	0	1	1	0	1	1	0	1	1
229613	6330549D23Rik	0.984898	1.16779	0.912799	0.993334	-0.233493	0.670127	0.556722	0.0999803	0.837366	0.762868	-0.191152	0.707569	0.595665	0.338674	0.356522	0.232042	0.0408782	0.91389	0.887863	-0.296874	0.345315	0.235915
76880	6430411K18Rik	0.804671	0.419007	0.745697	5.25409	0.63959	0.645978	0.52722	-0.306132	0.737306	0.630718	-2.546	0.00585029	0.00109458	-0.978615	0.177792	0.0930505	-3.20892	0.001592	0.000356303	-2.23151	0.000192339	1.6984e-05
78068	6430503K07Rik	0	0	0	0	0	1	1	0	1	1	0	1	1	0	1	1	0	1	1	0	1	1
381933	6430531B16Rik	0.026948	0	0.0141766	0.0689162	0	1	1	0	1	1	0	1	1	0	1	1	0	1	1	0	1	1
234797	6430548M08Rik	7.5872	18.2219	11.3373	17.2672	-1.34894	5.44532e-06	2.28968e-07	-0.666526	0.00282161	0.000445987	-1.37848	2.79332e-05	1.54241e-06	0.681872	1.14523e-05	6.73309e-07	-0.0252787	0.891167	0.858544	-0.714004	0.000697983	8.73434e-05
320095	6430550D23Rik	0.030911	0	0.0540051	0.321798	0	1	1	0	1	1	-2.03093	0.147779	0.0710097	0	1	1	-1.46709	0.149163	0.0961963	-1.90084	0.0478402	0.019395
619300	6430553K19Rik	0	0	0	0	0	1	1	0	1	1	0	1	1	0	1	1	0	1	1	0	1	1
320893	6430562O15Rik	0.14607	0.390935	0.366373	0.178489	0	1	1	-1.09559	0.144467	0.0679223	0	1	1	-0.0562339	0.947143	0.915917	0	1	1	1.06991	0.105969	0.0523522
235599	6430571L13Rik	0.031269	0.26107	0.172377	0.137344	0	1	1	-2.21736	0.0177266	0.00446567	0	1	1	0.578876	0.384717	0.256949	0	1	1	0.346376	0.622933	0.512611
319582	6430573F11Rik	0.664181	1.81231	1.03525	0.762125	-1.59647	0.00556781	0.00116101	-0.633266	0.164114	0.08036	-0.198812	0.722468	0.615261	0.975957	0.00564424	0.00126632	1.40086	0.00103643	0.000206692	0.426826	0.144247	0.0773662
330324	6430584L05Rik	0.838121	0.0898278	0.731273	0.47554	2.90671	0.0295806	0.00918189	0.152747	0.81671	0.736366	0.623436	0.384788	0.255603	-2.73197	0.000659759	9.31455e-05	-2.27759	0.00280835	0.000727309	0.47591	0.177913	0.101177
619719	6430590A07Rik	0.27476	0	0.465162	1.45939	0	1	1	-0.662374	0.474269	0.333562	-1.91013	0.0676353	0.0254155	-1.30151	0.0548604	0.021197	-2.53541	0.0108424	0.0038853	-1.25178	0.0408264	0.0158891
100043277	6430590A10Rik	0.230518	0	0.121198	0.216882	0	1	1	0.441278	0.542797	0.403502	0.170692	0.882528	0.823982	0	1	1	-1.03189	0.322114	0.243224	-0.25708	0.771397	0.68938
76237	6430628N08Rik	0	0	0.103333	0	0	1	1	0	1	1	0	1	1	0	1	1	0	1	1	0	1	1
78605	6430706D22Rik	2.27999	2.34813	3.69315	8.00701	0.00285693	0.995734	0.993332	-0.585637	0.0821532	0.0327148	-1.61285	0.000113676	8.80989e-06	-0.58824	0.0320668	0.0108494	-1.61553	6.63434e-06	3.96919e-07	-1.02676	7.46151e-05	5.07784e-06
76218	6430710C18Rik	0	0	0.0418214	0	0	1	1	0	1	1	0	1	1	0	1	1	0	1	1	0	1	1
76241	6530401F13Rik	0.089472	0.0715435	0.0953711	0.312691	0	1	1	0	1	1	0	1	1	0	1	1	0	1	1	0	1	1
76220	6530402F18Rik	1.02774	0.0283795	0.0421775	0.0584958	4.04217	0.00077531	0.000104782	4.69933	7.53861e-06	2.70236e-07	3.90199	0.000301484	2.88405e-05	0	1	1	0	1	1	0	1	1
320739	6530403H02Rik	0.335278	0.0164433	0.0922117	0.00497352	3.32227	0.0248421	0.00733772	1.65441	0.0258337	0.00725974	5.10779	0.00190025	0.000274529	-1.63282	0.0448973	0.0165499	0	1	1	3.45525	0.00188028	0.000316232
67791	6530411M01Rik	0	0	0.208303	0.341159	0	1	1	0	1	1	0	1	1	0	1	1	0	1	1	0	1	1
78073	6720468P15Rik	0	0.136476	0.0382979	0	0	1	1	0	1	1	0	1	1	0	1	1	0	1	1	0	1	1
77741	6720483E21Rik	0	0	0.0912631	0.0355619	0	1	1	0	1	1	0	1	1	0	1	1	0	1	1	0	1	1
211378	6720489N17Rik	0.230776	0.382936	0.457705	0.839234	-1.41071	0.196502	0.103338	-1.68808	0.0679421	0.0254194	-2.64508	0.00471079	0.000837117	-0.309655	0.66402	0.544856	-1.23908	0.0234845	0.0102009	-0.948738	0.0332149	0.0122625
228778	6820408C15Rik	0.0630429	0.572517	0.101315	0.229131	0	1	1	0	1	1	0	1	1	0	1	1	0	1	1	0	1	1
100126203	6820426E19Rik	0	0	0	0	0	1	1	0	1	1	0	1	1	0	1	1	0	1	1	0	1	1
547150	6820431F20Rik	0	0.0131601	0.0233476	0.0800913	0	1	1	0	1	1	0	1	1	0	1	1	0	1	1	0	1	1
546157	7420426K07Rik	0	0	0	0	0	1	1	0	1	1	0	1	1	0	1	1	0	1	1	0	1	1
100038657	7420461P10Rik	0	0	0	0	0	1	1	0	1	1	0	1	1	0	1	1	0	1	1	0	1	1
74517	7420700N18Rik	0	0	0	0	0	1	1	0	1	1	0	1	1	0	1	1	0	1	1	0	1	1
71457	7420701I03Rik	0	0	0.101522	0	0	1	1	0	1	1	0	1	1	0	1	1	0	1	1	0	1	1
328577	7530416G11Rik	0	0	0	0	0	1	1	0	1	1	0	1	1	0	1	1	0	1	1	0	1	1
319506	7530428D23Rik	0	0	0	0.476967	0	1	1	0	1	1	0	1	1	0	1	1	0	1	1	0	1	1
77119	7630403G23Rik	0	0	0	0.0342731	0	1	1	0	1	1	0	1	1	0	1	1	0	1	1	0	1	1
78609	8030411F24Rik	0	0	0	0	0	1	1	0	1	1	0	1	1	0	1	1	0	1	1	0	1	1
211001	8030423F21Rik	0	0	0.0151262	0.183622	0	1	1	0	1	1	0	1	1	0	1	1	0	1	1	0	1	1
77166	8030423J24Rik	0	0	0.0496387	0	0	1	1	0	1	1	0	1	1	0	1	1	0	1	1	0	1	1
77543	8030442B05Rik	0	0	0	0	0	1	1	0	1	1	0	1	1	0	1	1	0	1	1	0	1	1
77173	8030443G20Rik	0.178246	8.29127	7.52411	0.814293	-5.4838	7.93445e-06	3.74314e-07	-5.5406	3.23762e-06	9.22057e-08	-2.30754	0.0305688	0.00911203	-0.0497168	0.900647	0.847643	3.18716	1.77929e-05	1.38043e-06	3.23623	1.33522e-05	5.98611e-07
100504061	8030451A03Rik	0	0	0	0	0	1	1	0	1	1	0	1	1	0	1	1	0	1	1	0	1	1
77209	8030453O22Rik	0.296585	0	0.0639221	0.351143	2.63859	0.0152243	0.00399418	2.95565	0.00205425	0.000302567	0.318304	0.696008	0.58163	0	1	1	-2.30529	0.0218211	0.0092987	-2.62181	0.00603703	0.00137907
77171	8030455M16Rik	0	0	0	0	0	1	1	0	1	1	0	1	1	0	1	1	0	1	1	0	1	1
212163	8030462N17Rik	7.57193	12.415	8.51349	8.56848	-0.715551	0.00964799	0.00226186	-0.240579	0.361686	0.229861	-0.192493	0.468272	0.334227	0.47357	0.00951574	0.00241807	0.517476	0.00296986	0.000779685	0.0434722	0.827937	0.757904
382231	8030474K03Rik	0	0	0	0	0	1	1	0	1	1	0	1	1	0	1	1	0	1	1	0	1	1
213393	8430408G22Rik	0	0	0.145619	0.0861143	0	1	1	0	1	1	0	1	1	0	1	1	0	1	1	0	1	1
74518	8430419K02Rik	0	0	0	0	0	1	1	0	1	1	0	1	1	0	1	1	0	1	1	0	1	1
74529	8430422H06Rik	0	0	0	0	0	1	1	0	1	1	0	1	1	0	1	1	0	1	1	0	1	1
71473	8430423G03Rik	0	0	0	0	0	1	1	0	1	1	0	1	1	0	1	1	0	1	1	0	1	1
78102	8430426J06Rik	0	0	0.0767799	0	0	1	1	0	1	1	0	1	1	0	1	1	0	1	1	0	1	1
71523	8430429K09Rik	1.22515	0.591519	0.823841	0.747753	0.733577	0.316752	0.195174	0.586033	0.222435	0.120489	0.76705	0.193269	0.101838	-0.138786	0.762552	0.663591	0.035651	0.943998	0.925858	0.182162	0.597834	0.485441
78148	8430430B14Rik	0	0	0	0	0	1	1	0	1	1	0	1	1	0	1	1	0	1	1	0	1	1
78103	8430431K14Rik	0.702325	0	0.260731	0.111645	3.34363	0.0546488	0.0200485	1.37445	0.155324	0.0748057	2.81305	0.0872521	0.0355082	-1.97366	0.0116577	0.00310221	0	1	1	1.44315	0.175075	0.0990349
71510	8430436N08Rik	0	0	0	0	0	1	1	0	1	1	0	1	1	0	1	1	0	1	1	0	1	1
74541	8430437L04Rik	0	0	0	0	0	1	1	0	1	1	0	1	1	0	1	1	0	1	1	0	1	1
100041574	9030025P20Rik	0.0549704	0	0.0537331	0.0705534	0	1	1	0	1	1	0	1	1	0	1	1	0	1	1	0	1	1
77665	9030204H09Rik	0.656134	0.39651	0.204481	1.03515	0	1	1	0	1	1	-0.296541	0.802227	0.715735	0	1	1	0	1	1	0	1	1
71528	9030404E10Rik	0	0	0	0	0	1	1	0	1	1	0	1	1	0	1	1	0	1	1	0	1	1
100504389	9030407P20Rik	0.640199	0.224624	0.607537	0.59029	0.942037	0.214095	0.115811	0.357314	0.572571	0.435596	-0.0278986	0.971627	0.954287	-0.625398	0.447422	0.313491	-0.967031	0.226873	0.159549	-0.385663	0.555079	0.440344
74530	9030612E09Rik	0.061393	0.613372	0.237208	1.43959	0	1	1	-1.04382	0.277258	0.160996	-3.55957	0.00054536	5.92543e-05	0	1	1	-1.60529	0.023776	0.0103746	-2.5324	0.000117649	9.17904e-06
77699	9030616G12Rik	0	0	0	0	0	1	1	0	1	1	0	1	1	0	1	1	0	1	1	0	1	1
105892	9030619P08Rik	0	0	0	0	0	1	1	0	1	1	0	1	1	0	1	1	0	1	1	0	1	1
100043820	9030622O22Rik	0	0	0	0.00672532	0	1	1	0	1	1	0	1	1	0	1	1	0	1	1	0	1	1
66808	9030624G23Rik	0.0136072	0	0.0275438	0	0	1	1	0	1	1	0	1	1	0	1	1	0	1	1	0	1	1
71517	9030624J02Rik	6.63927	4.84192	5.65213	4.43524	0.384617	0.296924	0.179624	0.0615222	0.837014	0.76234	0.354944	0.271826	0.159636	-0.3242	0.176697	0.0923614	-0.0317488	0.915797	0.890404	0.29557	0.175977	0.099763
71545	9030625G05Rik	0	0	0	0	0	1	1	0	1	1	0	1	1	0	1	1	0	1	1	0	1	1
71575	9130001E16Rik	0	0	0	0	0	1	1	0	1	1	0	1	1	0	1	1	0	1	1	0	1	1
71583	9130008F23Rik	0	0	0.0503827	0	0	1	1	0	1	1	0	1	1	0	1	1	0	1	1	0	1	1
71617	9130011E15Rik	2.42669	2.03733	3.19516	2.83038	0.266635	0.505393	0.372355	-0.174268	0.56403	0.426761	-0.117953	0.703504	0.590734	-0.439643	0.154623	0.0776106	-0.389222	0.131592	0.0825935	0.0562294	0.80492	0.729158
71581	9130015A21Rik	0	0	0	0	0	1	1	0	1	1	0	1	1	0	1	1	0	1	1	0	1	1
71613	9130015L21Rik	0	0	0	0	0	1	1	0	1	1	0	1	1	0	1	1	0	1	1	0	1	1
78921	9130019O22Rik	0.141047	0.32523	0.300926	0.365851	-0.877664	0.247664	0.140827	-0.708609	0.231884	0.127155	-1.08891	0.0935497	0.0388758	0.171956	0.729963	0.622791	-0.202844	0.671465	0.597999	-0.38448	0.252694	0.157869
100042056	9130019P16Rik	2.09459	1.09054	1.5111	0.113957	0.857243	0.133242	0.0625291	0.423585	0.303265	0.181561	4.19367	0.000141503	1.16268e-05	-0.436355	0.219693	0.122597	3.34016	9.53423e-06	6.36278e-07	3.79643	1.18574e-05	5.16177e-07
100043133	9130023H24Rik	0.471586	0.962894	0.481892	0.841164	-0.96237	0.138186	0.0656117	0.062591	0.913581	0.866126	-0.713789	0.148168	0.0712247	1.01997	0.0268467	0.00864859	0.250885	0.567673	0.486255	-0.781547	0.0104347	0.00279653
329160	9130024F11Rik	0.619302	0.0692328	0.111239	0.0106838	3.00791	0.0107019	0.00258493	2.55443	0.000419483	4.17107e-05	4.75444	0.000165969	1.40767e-05	-0.351414	0.740152	0.634787	0	1	1	2.20441	0.013918	0.00405243
229550	9130204L05Rik	0	0	0	0	0	1	1	0	1	1	0	1	1	0	1	1	0	1	1	0	1	1
77700	9130208D14Rik	0.00504776	0	0.00389064	0.00547094	0	1	1	0	1	1	0	1	1	0	1	1	0	1	1	0	1	1
77668	9130209A04Rik	0	0	0	0	0	1	1	0	1	1	0	1	1	0	1	1	0	1	1	0	1	1
330350	9130221F21Rik	0	0	0	0	0	1	1	0	1	1	0	1	1	0	1	1	0	1	1	0	1	1
77124	9130221H12Rik	11.9141	13.8704	10.7789	6.69243	-0.277874	0.446476	0.314906	0.127849	0.724511	0.613762	0.858146	0.0415032	0.013596	0.399965	0.121457	0.057222	1.12803	0.0015706	0.000349261	0.744428	0.0283364	0.0100157
329159	9130227L01Rik	0	0	0	0	0	1	1	0	1	1	0	1	1	0	1	1	0	1	1	0	1	1
231253	9130230L23Rik	0	0	0	0	0	1	1	0	1	1	0	1	1	0	1	1	0	1	1	0	1	1
75758	9130401M01Rik	7.12226	6.2774	7.51158	5.31645	0.101259	0.79631	0.71024	-0.0222206	0.948122	0.917377	0.363229	0.257051	0.147896	-0.124315	0.687792	0.572803	0.26128	0.351233	0.270105	0.392812	0.10923	0.0544089
619326	9130409I23Rik	0	0	0	0	0	1	1	0	1	1	0	1	1	0	1	1	0	1	1	0	1	1
619293	9230009I02Rik	0	0	0.0539779	0	0	1	1	0	1	1	0	1	1	0	1	1	0	1	1	0	1	1
215728	9230019H11Rik	0	0	0	0	0	1	1	0	1	1	0	1	1	0	1	1	0	1	1	0	1	1
619299	9230020A06Rik	0	0	0.00395467	0	0	1	1	0	1	1	0	1	1	0	1	1	0	1	1	0	1	1
109335	9230102K24Rik	0	0	0	0	0	1	1	0	1	1	0	1	1	0	1	1	0	1	1	0	1	1
77682	9230102O04Rik	0	0	0	0	0	1	1	0	1	1	0	1	1	0	1	1	0	1	1	0	1	1
77705	9230104L09Rik	0	0	0	0	0	1	1	0	1	1	0	1	1	0	1	1	0	1	1	0	1	1
320626	9230105E05Rik	0	0	0	0	0	1	1	0	1	1	0	1	1	0	1	1	0	1	1	0	1	1
234912	9230110C19Rik	1.69696	0.877516	1.7258	1.63549	0.883855	0.0896765	0.0375347	-0.0581967	0.886576	0.828557	0.00935494	0.985915	0.97603	-0.928496	0.0278299	0.00903943	-0.877077	0.0471963	0.0238302	0.0688194	0.837796	0.771062
77080	9230110F15Rik	0	0	0	0	0	1	1	0	1	1	0	1	1	0	1	1	0	1	1	0	1	1
78243	9230112D13Rik	0	0	0	0	0	1	1	0	1	1	0	1	1	0	1	1	0	1	1	0	1	1
100504561	9230112J17Rik	0.0284295	0	0.0905006	0.0325403	0	1	1	0	1	1	0	1	1	0	1	1	0	1	1	0	1	1
77908	9230113P08Rik	0	0	0	0	0	1	1	0	1	1	0	1	1	0	1	1	0	1	1	0	1	1
414108	9230114K14Rik	0.798234	1.90095	1.05024	1.71369	-1.38522	0.0356748	0.0116358	-0.607691	0.311557	0.188551	-1.33011	0.0252474	0.00709716	0.791052	0.0521073	0.0198446	0.0679536	0.855346	0.81235	-0.733902	0.0279223	0.00983337
321017	9230116L04Rik	0.0385416	0.110316	0.121314	0.303746	0	1	1	0	1	1	0	1	1	0	1	1	0	1	1	0	1	1
320054	9230116N13Rik	0	0	0.0410222	0	0	1	1	0	1	1	0	1	1	0	1	1	0	1	1	0	1	1
78082	9230117E06Rik	1.23055	0.0391277	0.556674	1.18754	3.60328	0.0615775	0.0233245	1.28972	0.101192	0.0427022	0.0649195	0.945775	0.915322	-2.2659	0.0121919	0.00327231	-3.54837	0.00206831	0.000494264	-1.23637	0.00635028	0.00147078
100048895	9330020H09Rik	0.439094	0.447523	0.25793	0.375826	0.149049	0.867463	0.801628	0.4785	0.397441	0.261418	0.0875525	0.909945	0.864671	0.343663	0.521385	0.387459	-0.0579049	0.931767	0.910449	-0.379571	0.385601	0.272217
330427	9330102E08Rik	1.83912	1.93811	0.716189	0.958947	0.183601	0.705447	0.597639	1.55605	0.000613829	6.66973e-05	1.13598	0.0106994	0.00237562	1.36945	0.000157126	1.6519e-05	0.960901	0.00263787	0.00067172	-0.414133	0.128097	0.0665431
320950	9330104G04Rik	0.23784	0.272735	0.184469	0.281449	0	1	1	0.324188	0.690171	0.570186	-0.567457	0.507192	0.371775	0.947855	0.0659896	0.0265481	0	1	1	-0.883626	0.0684752	0.030449
319983	9330111N05Rik	0	0	0.0320414	0.0865232	0	1	1	0	1	1	0	1	1	0	1	1	0	1	1	0	1	1
328957	9330117O12Rik	0.587847	0	0.0424931	0.239287	1.39715	0.414286	0.283526	3.10366	0.0528351	0.0182367	0.314904	0.836479	0.759994	0	1	1	0	1	1	0	1	1
100689703	9330133O14Rik	1.22368	1.24571	1.37894	1.13975	-0.167222	0.781104	0.691076	-0.380918	0.346468	0.216973	-0.123266	0.79971	0.712669	-0.208249	0.616811	0.490594	0.044868	0.9113	0.884278	0.252495	0.360222	0.249471
319870	9330136K24Rik	0.140704	0	0.32424	0.560053	0	1	1	0	1	1	0	1	1	0	1	1	0	1	1	0	1	1
414085	9330151L19Rik	5.42643	4.84116	4.53951	4.94742	0.518522	0.15663	0.0770246	0.411965	0.128286	0.0583493	0.186308	0.528487	0.393782	-0.110353	0.728323	0.620437	-0.325426	0.228664	0.161	-0.221586	0.299006	0.195614
442799	9330154J02Rik	0	0	0.128438	0.3537	0	1	1	-2.56665	0.0118738	0.00269375	-3.93922	0.000231059	2.08941e-05	-0.721686	0.408465	0.278298	-2.11314	0.00691799	0.00222347	-1.36712	0.0325441	0.0119665
319472	9330158H04Rik	0	0.166884	0.16541	0	0	1	1	-1.97268	0.169015	0.0836495	0	1	1	0.909421	0.38803	0.259899	0	1	1	2.55477	0.0515581	0.0213397
212448	9330159F19Rik	9.17273	6.27362	11.9194	14.5895	0.716402	0.0775276	0.0312686	-0.232854	0.52885	0.388432	-0.535997	0.200236	0.106633	-0.965492	2.71198e-05	1.95706e-06	-1.26228	0.000379702	5.68015e-05	-0.301643	0.292038	0.189647
319673	9330159M07Rik	0	0	0.0454706	0.0415966	0	1	1	0	1	1	0	1	1	0	1	1	0	1	1	0	1	1
493800	9330162012Rik	0.407722	0.416544	0.400258	0.473426	0	1	1	0.368254	0.659596	0.530674	0.118093	0.898593	0.847651	0.360407	0.692347	0.578474	0.114835	0.89572	0.864154	-0.283919	0.690077	0.589401
320272	9330162B11Rik	0	0	0.0282411	0.054018	0	1	1	0	1	1	0	1	1	0	1	1	0	1	1	0	1	1
320377	9330175E14Rik	0	0	0	0	0	1	1	0	1	1	0	1	1	0	1	1	0	1	1	0	1	1
442821	9330175M20Rik	0.244858	0.182345	0.298368	0.439829	-0.419548	0.777352	0.686312	-0.85216	0.385723	0.25106	-1.06693	0.363566	0.236325	-0.437658	0.5697	0.440017	-0.659502	0.477049	0.393138	-0.207891	0.75634	0.670164
329780	9330178D15Rik	0	0	0	0	0	1	1	0	1	1	0	1	1	0	1	1	0	1	1	0	1	1
77558	9330179D12Rik	0.733265	0.541421	0.826758	1.42167	0.22057	0.828665	0.750123	-0.147509	0.849185	0.777811	-0.785002	0.289932	0.174531	-0.391523	0.585164	0.456756	-1.00864	0.147843	0.095136	-0.640419	0.232708	0.141968
231014	9330182L06Rik	4.5522	9.15622	12.5839	5.54879	-0.883901	0.00191823	0.000316686	-1.4477	9.25891e-06	3.51394e-07	-0.264048	0.488707	0.35388	-0.566735	0.00240556	0.000446676	0.625347	0.0465938	0.0234433	1.1852	0.000833664	0.000110422
328531	9330182O14Rik	0	0	0	0	0	1	1	0	1	1	0	1	1	0	1	1	0	1	1	0	1	1
380930	9330188P03Rik	0	0	0.0833999	0	0	1	1	0	1	1	0	1	1	0	1	1	0	1	1	0	1	1
381572	9430007A20Rik	0	0	0	0	0	1	1	0	1	1	0	1	1	0	1	1	0	1	1	0	1	1
77248	9430014N10Rik	0	0	0	0.0327883	0	1	1	0	1	1	0	1	1	0	1	1	0	1	1	0	1	1
230996	9430015G10Rik	0.893096	1.66814	0.80804	1.28405	-1.0069	0.100647	0.0435697	0.0307419	0.956202	0.931042	-0.593836	0.239855	0.135174	1.02692	0.0155201	0.00442604	0.414977	0.333706	0.253937	-0.618537	0.0448308	0.0178945
319812	9430018G01Rik	0	0	0.0361293	0.195211	0	1	1	0	1	1	-2.58876	0.124512	0.0568383	0	1	1	-1.52028	0.278145	0.203698	-1.61823	0.210774	0.12501
77269	9430019J16Rik	0	0	0	0	0	1	1	0	1	1	0	1	1	0	1	1	0	1	1	0	1	1
77288	9430021M05Rik	0.933252	3.96399	4.19501	2.50973	-2.09033	0.000358145	4.01669e-05	-2.30518	2.35989e-05	1.16884e-06	-1.53746	0.00266419	0.000412615	-0.219301	0.401056	0.271568	0.557146	0.0459165	0.0230297	0.770586	0.000981666	0.000137928
77257	9430024E24Rik	0	0	0.0528568	0.0150257	0	1	1	0	1	1	0	1	1	0	1	1	0	1	1	0	1	1
320692	9430037G07Rik	0	0.127691	0.126835	0.192476	0	1	1	0	1	1	0	1	1	0	1	1	0	1	1	-0.952863	0.286937	0.185588
77252	9430038I01Rik	0.0904737	0	0.149619	0.138004	0	1	1	-0.336443	0.690171	0.570144	0	1	1	-0.660207	0.3969	0.267895	0	1	1	-0.0143875	0.98564	0.979354
77323	9430041J12Rik	0.26171	0.283449	0.28833	0.280986	0	1	1	-0.269709	0.807236	0.722974	-0.178111	0.892137	0.838467	-0.0254133	0.975208	0.959548	0	1	1	0.105507	0.858348	0.798808
100037260	9430060I03Rik	0.246824	0	0.11525	0.138238	0	1	1	0	1	1	0	1	1	0	1	1	0	1	1	0	1	1
77857	9430065F17Rik	0.0729677	0	0.120668	0.318649	0	1	1	0	1	1	0	1	1	0	1	1	0	1	1	0	1	1
77358	9430069I07Rik	0.775676	0.10719	0.67074	0.172719	0	1	1	0.410422	0.594369	0.459696	0	1	1	-0.580079	0.429743	0.297387	0	1	1	1.45902	0.0378764	0.0144525
619307	9430078G10Rik	0.226248	0.122232	0.172184	0.380568	0.669555	0.476276	0.344001	0.253337	0.717032	0.604674	-0.66232	0.369594	0.241773	-0.455185	0.504202	0.370889	-1.32478	0.0862534	0.0494711	-0.885722	0.0944586	0.0453429
77290	9430078K24Rik	0.0106564	0	0	0	0	1	1	0	1	1	0	1	1	0	1	1	0	1	1	0	1	1
77428	9430083A17Rik	0.803707	0.818905	0.620868	0.770782	0.159952	0.839865	0.764661	0.771195	0.187893	0.0960171	0.32776	0.63962	0.51531	0.621093	0.170829	0.0884099	0.162542	0.745662	0.680731	-0.451738	0.328532	0.221015
77361	9430085M18Rik	0.218892	0	0.0841538	0.0468262	0	1	1	0	1	1	0	1	1	0	1	1	0	1	1	0	1	1
434350	9430091E24Rik	0.778914	0.782729	0.747121	1.74688	-0.236059	0.704598	0.596364	-0.0507842	0.92394	0.881896	-1.22611	0.0158585	0.00388713	0.181052	0.680495	0.56406	-0.997095	0.0312542	0.0143485	-1.16834	0.00154899	0.000244593
319245	9430097D07Rik	0.0838789	0.416497	0.268308	0.260501	0	1	1	-1.23257	0.218416	0.117538	0	1	1	0.553071	0.472748	0.338859	0	1	1	-0.0438254	0.945292	0.919841
77432	9530002B09Rik	0	0	0	0	0	1	1	0	1	1	0	1	1	0	1	1	0	1	1	0	1	1
77397	9530003J23Rik	0	0	0	0	0	1	1	0	1	1	0	1	1	0	1	1	0	1	1	0	1	1
77370	9530004M14Rik	0	0	0	0	0	1	1	0	1	1	0	1	1	0	1	1	0	1	1	0	1	1
77398	9530014B07Rik	0	0	0	0	0	1	1	0	1	1	0	1	1	0	1	1	0	1	1	0	1	1
77442	9530020I12Rik	0	0	0	0	0	1	1	0	1	1	0	1	1	0	1	1	0	1	1	0	1	1
77341	9530026F06Rik	0	0	0	0	0	1	1	0	1	1	0	1	1	0	1	1	0	1	1	0	1	1
330385	9530026P05Rik	0.0381339	0.0616209	0.12707	0	0	1	1	0	1	1	0	1	1	0	1	1	0	1	1	0	1	1
100500713	9530027J09Rik	1.89642	0.612006	1.2344	0.840497	1.29618	0.117444	0.0532284	0.25617	0.582258	0.445886	0.782672	0.154289	0.0753933	-1.06692	0.0906002	0.0393767	-0.511972	0.452659	0.368539	0.525836	0.181206	0.103451
78615	9530034E10Rik	0.473581	0	0.0217368	0.293486	2.23688	0.123503	0.0567839	2.99064	0.0241012	0.00661767	0.478844	0.707136	0.595149	0	1	1	0	1	1	0	1	1
78616	9530036M11Rik	0.0188647	0	0.0306092	0.0132016	0	1	1	0	1	1	0	1	1	0	1	1	0	1	1	0	1	1
654796	9530036O11Rik	0	0.263432	0.0614763	0.0136122	0	1	1	0	1	1	0	1	1	1.89079	0.0499507	0.0188711	0	1	1	0	1	1
78419	9530047P18Rik	0	0	0	0	0	1	1	0	1	1	0	1	1	0	1	1	0	1	1	0	1	1
319781	9530051G07Rik	0.161264	0.199548	0.259235	0.344776	-0.436701	0.774927	0.683476	-1.07793	0.282264	0.165047	-1.39392	0.24138	0.136322	-0.613517	0.346135	0.222831	-0.975268	0.247901	0.177097	-0.312448	0.579119	0.464866
619321	9530052E02Rik	0.724202	0.335675	0.211935	0.543338	0.664236	0.51138	0.378309	1.49231	0.0789358	0.0310475	0.38041	0.627948	0.50163	0	1	1	0	1	1	0	1	1
319482	9530053A07Rik	0	0	0.00391786	0	0	1	1	0	1	1	0	1	1	0	1	1	0	1	1	0	1	1
319626	9530059O14Rik	1.99431	0.22581	0.515988	0.826725	3.26269	0.0262137	0.00785491	1.92968	0.0028317	0.000447932	1.1124	0.112962	0.0499203	-1.32677	0.152728	0.0763692	-2.14884	0.0605291	0.0321951	-0.824699	0.116073	0.058694
78739	9530062K07Rik	0.460485	0	0.0279475	0.228999	0	1	1	0	1	1	0	1	1	0	1	1	0	1	1	0	1	1
213673	9530068E07Rik	19.6517	23.4692	19.8672	15.9945	-0.325547	0.249951	0.142627	-0.206749	0.391448	0.256094	0.027224	0.936186	0.901411	0.120942	0.44907	0.315352	0.355193	0.0880318	0.0508125	0.237637	0.191032	0.110415
68283	9530077C05Rik	0.975503	1.09902	1.02873	1.5622	-0.24996	0.750956	0.653585	-0.355795	0.493634	0.351888	-0.967689	0.0625949	0.023032	-0.105917	0.800704	0.712326	-0.715536	0.0428698	0.0211685	-0.613557	0.00802217	0.00198768
319247	9530080O11Rik	1.11408	0.285902	0.690532	1.90144	1.92593	0.0401174	0.0135393	0.840526	0.126594	0.0572383	-0.486869	0.436705	0.302896	-1.09592	0.0382921	0.0135712	-2.41103	0.00290755	0.000760347	-1.32586	0.0041886	0.000861893
638247	9530082P21Rik	2.85218	7.79075	5.71367	4.75915	-1.48189	1.57504e-05	8.81599e-07	-0.950437	0.000690445	7.73288e-05	-0.641473	0.0225104	0.00612838	0.532968	0.00953277	0.0024249	0.832643	0.00096158	0.000187299	0.309779	0.130569	0.0681182
320440	9530091C08Rik	0.981776	0.766317	0.384643	1.81451	0.587659	0.584783	0.455344	1.45059	0.051114	0.0174409	-0.8727	0.248724	0.141788	0.876114	0.142876	0.0703349	-1.47768	0.0460725	0.0231315	-2.32238	0.000521359	5.9952e-05
319251	9630001P10Rik	0.106991	0	0.110349	1.17809	0	1	1	0	1	1	-3.54261	0.000254907	2.34525e-05	0	1	1	-3.98418	0.000407853	6.24231e-05	-3.56108	7.22429e-05	4.87167e-06
319560	9630002D21Rik	0	0	0.179704	0	0	1	1	-3.23081	0.00141907	0.00018986	0	1	1	-1.05223	0.159499	0.0809359	0	1	1	3.18667	0.000988433	0.000139218
319903	9630013A20Rik	0.703496	0.255463	0.320353	1.15079	1.14787	0.451075	0.319331	0.571848	0.583793	0.447856	-0.923828	0.461411	0.327044	-0.601627	0.403311	0.273597	-2.08578	0.118923	0.0730901	-1.4612	0.0994006	0.0483887
319743	9630013D21Rik	0	0	0	0	0	1	1	0	1	1	0	1	1	0	1	1	0	1	1	0	1	1
78883	9630013K17Rik	0	0	0.0552675	0.0636696	0	1	1	0	1	1	0	1	1	0	1	1	0	1	1	0	1	1
381155	9630014M24Rik	0.0878507	0.647989	0.389935	0.842218	-3.50744	0.00084844	0.000117204	-2.49239	0.00680613	0.00134505	-3.61181	0.000651338	7.30692e-05	1.00419	0.0219184	0.00675783	-0.11221	0.805766	0.752001	-1.11014	0.00715571	0.00171239
78569	9630015K15Rik	0.0539001	0	0.0770505	0.393201	0	1	1	0	1	1	-2.60168	0.0091473	0.00194903	0	1	1	-2.11026	0.0026339	0.000669897	-2.08283	0.00174679	0.000286426
319562	9630028B13Rik	0.0770099	0	0.0364114	0.136296	0	1	1	0	1	1	0	1	1	0	1	1	0	1	1	0	1	1
320684	9630028H03Rik	0	0	0	0	0	1	1	0	1	1	0	1	1	0	1	1	0	1	1	0	1	1
319720	9630028I04Rik	0.0119663	0	0.0212435	0	0	1	1	0	1	1	0	1	1	0	1	1	0	1	1	0	1	1
328829	9830107B12Rik	0	0	0	0	0	1	1	0	1	1	0	1	1	0	1	1	0	1	1	0	1	1
329753	9830132P13Rik	0	0	0.0037055	0	0	1	1	0	1	1	0	1	1	0	1	1	0	1	1	0	1	1
402757	9830166K06Rik	0.951396	0	0.0508247	0.0349906	3.4513	0.00365792	0.000691896	3.85846	0.000617339	6.723e-05	4.03341	0.000849678	0.000101374	0	1	1	0	1	1	0	1	1
268759	9930012K11Rik	0.0621572	0.123077	0.334846	0.33003	0	1	1	-2.00727	0.0736428	0.0282931	0	1	1	-0.473471	0.603803	0.476528	0	1	1	0.721423	0.477759	0.360161
320469	9930014A18Rik	1.07294	0.166151	0.0779671	0.0778604	2.81922	0.000916956	0.000128565	3.75526	3.28898e-06	9.43664e-08	3.71075	0.00047251	4.95512e-05	0	1	1	0	1	1	-0.0435703	0.96638	0.951359
240613	9930021J03Rik	13.3199	13.3649	17.2179	17.8363	0.114761	0.635401	0.515171	-0.267779	0.192288	0.0987985	-0.376237	0.10936	0.0477768	-0.389145	0.00531641	0.00117988	-0.496537	0.00568468	0.00173971	-0.107882	0.509103	0.393058
319503	9930038B18Rik	0	0	0	0	0	1	1	0	1	1	0	1	1	0	1	1	0	1	1	0	1	1
194268	9930104L06Rik	0.965266	0.433988	0.957547	1.33459	0.657748	0.45445	0.322598	-0.311178	0.600298	0.465864	-0.794437	0.205706	0.110571	-0.960635	0.0432758	0.0157537	-1.454	0.012347	0.00458394	-0.487751	0.19581	0.113783
77762	9930111H07Rik	0	0	0	0	0	1	1	0	1	1	0	1	1	0	1	1	0	1	1	0	1	1
667214	9930111J21Rik1	0.0130042	0	0	0	0	1	1	0	1	1	0	1	1	0	1	1	0	1	1	0	1	1
245240	9930111J21Rik2	0	0	0	0	0	1	1	0	1	1	0	1	1	0	1	1	0	1	1	0	1	1
50518	a	0	0	0	0	0	1	1	0	1	1	0	1	1	0	1	1	0	1	1	0	1	1
100126243	A030001D20Rik	1.48042	1.66896	1.57639	1.59082	-0.421582	0.459978	0.327949	-0.0787638	0.887733	0.830384	-0.298916	0.569558	0.438249	0.337391	0.498378	0.364678	0.123044	0.792135	0.735871	-0.222809	0.595712	0.483239
319266	A130010J15Rik	0.804584	1.35501	1.30848	1.72139	-1.3968	0.0335605	0.0107504	-1.27214	0.0158103	0.00386154	-1.64875	0.00452081	0.000794667	0.117199	0.748314	0.644874	-0.248011	0.445859	0.361957	-0.378203	0.110497	0.0551699
442810	A130023E24Rik	0.714459	0.118876	0.20211	0.469729	1.82348	0.156595	0.076961	1.30342	0.078915	0.0310344	-0.288886	0.745444	0.643814	-0.538196	0.373901	0.247225	-2.11433	0.0303934	0.013891	-1.59327	0.0084197	0.00211418
228116	A130030D18Rik	0	0	0	0.0599839	0	1	1	0	1	1	0	1	1	0	1	1	0	1	1	0	1	1
791370	A130051J06Rik	0.200737	0.0307942	0.0634171	0.330909	1.25997	0.393773	0.263646	1.47553	0.165513	0.0812807	-0.937017	0.313063	0.193764	0	1	1	-2.20994	0.0025937	0.00065737	-2.40586	0.00015815	1.32796e-05
319272	A130077B15Rik	0	0	0	0	0	1	1	0	1	1	0	1	1	0	1	1	0	1	1	0	1	1
117586	A1bg	0	0	0	0	0	1	1	0	1	1	0	1	1	0	1	1	0	1	1	0	1	1
69865	A1cf	0	0	0.00984238	0.0432389	0	1	1	0	1	1	0	1	1	0	1	1	0	1	1	0	1	1
319951	A230001M10Rik	0.0641958	0	0	0	0	1	1	0	1	1	0	1	1	0	1	1	0	1	1	0	1	1
102637814	A230004M16Rik	2.91757	2.7484	1.24851	3.64148	0.496319	0.396134	0.266156	1.38863	0.0019529	0.000282924	-0.257772	0.610555	0.482422	0.893734	0.0165442	0.00479691	-0.757058	0.132726	0.0835003	-1.65207	0.000305235	3.03175e-05
27493	A230006K03Rik	1.89656	1.14342	10.1859	19.5829	1.34524	0.121786	0.0557512	-2.13505	0.000701039	7.92532e-05	-3.14577	0.000142053	1.16989e-05	-3.47666	1.6934e-06	6.32469e-08	-4.49275	1.18435e-05	8.26664e-07	-1.03582	0.0320287	0.0117076
319750	A230009B12Rik	0.0459119	0	0.05928	0.136648	0	1	1	0	1	1	0	1	1	0	1	1	0	1	1	0	1	1
100125339	A230020J21Rik	0.302006	0.111545	0.270101	0.63993	0.322194	0.755768	0.659564	0.404231	0.546628	0.407893	-0.64877	0.349604	0.224317	0.0538911	0.952956	0.925192	-0.976526	0.201657	0.138028	-1.05914	0.0362715	0.0136785
319487	A230028O05Rik	0	0	0	0.0132773	0	1	1	0	1	1	0	1	1	0	1	1	0	1	1	0	1	1
624086	A230045G11Rik	3.72519	7.93424	5.11511	6.37649	-0.991028	0.0414177	0.0140809	-0.474886	0.342924	0.213966	-0.74433	0.206052	0.110835	0.51489	0.258434	0.151809	0.244035	0.655698	0.581429	-0.270522	0.614254	0.502883
319278	A230050P20Rik	1.1496	1.47706	1.29032	2.77248	-0.0475262	0.968105	0.947084	-0.151034	0.843269	0.770387	-1.14081	0.0977631	0.0412223	-0.102371	0.840183	0.762096	-1.10433	0.00830849	0.00278501	-0.985583	0.00525618	0.00115708
442796	A230052G05Rik	0	0	0	0	0	1	1	0	1	1	0	1	1	0	1	1	0	1	1	0	1	1
319469	A230056J06Rik	0.456818	0.147541	0.233227	0.995914	0.156446	0.929086	0.888241	0.185988	0.878808	0.817101	-2.01795	0.0479868	0.0164011	-0.0141985	0.984014	0.974275	-2.1839	0.00327564	0.000878082	-2.19069	0.000134421	1.08376e-05
320845	A230056P14Rik	5.99716	6.85911	6.34656	6.36347	-0.0118455	0.982644	0.97217	0.153449	0.686276	0.564716	0.151649	0.740446	0.637816	0.165739	0.634934	0.511616	0.173862	0.653703	0.579217	-0.00456975	0.98975	0.985549
319893	A230057D06Rik	1.07508	1.70252	1.58942	8.77494	-0.429463	0.659129	0.543288	-0.385391	0.581982	0.445581	-2.85197	0.00272249	0.000424048	0.0342	0.933568	0.895876	-2.42421	0.00513003	0.00153249	-2.4582	0.000173725	1.49639e-05
100043072	A230070E04Rik	15.5327	8.65022	4.11268	1.61781	0.8274	0.0294391	0.00911563	1.97018	1.11276e-05	4.5125e-07	3.19205	1.4055e-06	3.5984e-08	1.14096	0.000272086	3.17436e-05	2.36961	1.9795e-07	5.24626e-09	1.21945	0.000676514	8.39192e-05
320742	A230072C01Rik	1.72781	1.72153	2.33822	4.24464	-0.103058	0.879471	0.818362	-0.529887	0.211853	0.112708	-1.26838	0.00742875	0.00149343	-0.425453	0.169781	0.087589	-1.16683	0.000970552	0.000189775	-0.742544	0.00317088	0.000608138
331547	A230072E10Rik	0.502459	0.590576	0.842047	1.03681	-0.354029	0.668951	0.555263	-0.692947	0.209868	0.111041	-0.875002	0.191014	0.100235	-0.3489	0.406109	0.276187	-0.519022	0.322527	0.243624	-0.177549	0.639226	0.531777
619290	A230072I06Rik	0.0135127	0	0.0199307	0.0267905	0	1	1	0	1	1	0	1	1	0	1	1	0	1	1	0	1	1
320210	A230077H06Rik	1.63044	1.3376	1.34985	0.78138	0.560562	0.385373	0.255711	0.352955	0.397332	0.261276	1.46437	0.0478203	0.01632	-0.2111	0.555917	0.424926	0.902923	0.172015	0.114168	1.1096	0.0351499	0.0131554
442825	A230083G16Rik	0.578648	0.215768	0.25881	0.427818	1.40438	0.195173	0.102383	1.37469	0.0737335	0.0283531	0.42976	0.587044	0.456775	-0.0455658	0.962153	0.938883	-0.967742	0.17118	0.113484	-0.936429	0.0949443	0.0456643
100503323	A230087F16Rik	0.445504	0.588239	0.569252	0.495462	-0.20537	0.800453	0.715646	-0.251849	0.639942	0.509315	-0.0852585	0.896668	0.844534	-0.0670697	0.924274	0.881201	0.118368	0.855253	0.812204	0.173253	0.682131	0.580333
97209	A230098N10Rik	0	0	0	0	0	1	1	0	1	1	0	1	1	0	1	1	0	1	1	0	1	1
320466	A230103J11Rik	1.13823	1.91846	1.80466	0.782816	-0.335636	0.574206	0.443627	-0.538863	0.194323	0.100277	0.48514	0.319387	0.199169	-0.199168	0.687004	0.571791	0.825151	0.0768587	0.0430195	1.03202	0.00728255	0.00174889
77753	A230103O09Rik	0	0	0	0.0283577	0	1	1	0	1	1	0	1	1	0	1	1	0	1	1	0	1	1
320919	A230107N01Rik	0.42848	0.0251488	0.352099	0.77819	1.25943	0.346603	0.22093	0.101162	0.925913	0.884809	-1.37843	0.130759	0.06063	-1.16981	0.175414	0.0915529	-2.66031	0.00577206	0.00177198	-1.49183	0.0204935	0.00667763
320132	A230108P19Rik	0	0	0	0	0	1	1	0	1	1	0	1	1	0	1	1	0	1	1	0	1	1
622251	A26c2	0	0	0	0	0	1	1	0	1	1	0	1	1	0	1	1	0	1	1	0	1	1
232345	A2m	0	0	0.00996702	0	0	1	1	0	1	1	0	1	1	0	1	1	0	1	1	0	1	1
232400	A2ml1	1.20269	0.371948	0.496024	0.0550117	1.33987	0.0543221	0.019891	1.10237	0.0178087	0.00449186	4.03272	0.000170887	1.458e-05	-0.230977	0.620348	0.494465	0	1	1	2.92772	8.56633e-05	6.04775e-06
234624	A330008L17Rik	1.96205	0.13078	0.441134	1.37914	4.19098	0.00404995	0.000786149	2.15549	0.000498268	5.16313e-05	0.593499	0.288129	0.173044	-2.02393	0.0102539	0.00264867	-3.60038	0.00125276	0.000262581	-1.56751	0.00125659	0.000187761
380977	A330009N23Rik	1.13605	0.226693	0.471466	0.123955	1.88712	0.0621459	0.0235955	1.2047	0.0738819	0.0284284	3.10421	0.00649339	0.00125463	-0.680921	0.329985	0.208836	0	1	1	1.85029	0.0302681	0.01091
102637797	A330015K06Rik	0.157063	0	0.168957	0.266207	0	1	1	0	1	1	0	1	1	0	1	1	0	1	1	0	1	1
320977	A330023F24Rik	1.67779	1.76233	1.94284	10.2477	0.52094	0.540052	0.408126	0.147125	0.797452	0.710715	-2.15519	0.00166357	0.000233517	-0.363326	0.458381	0.324625	-2.68991	0.000451525	7.1867e-05	-2.31216	3.50255e-05	2.00189e-06
319931	A330032B11Rik	0.614849	0.242493	0.346344	1.46482	1.02853	0.422607	0.291458	1.12565	0.199675	0.10391	-0.984176	0.220234	0.120922	0.0711409	0.922117	0.878057	-2.02064	0.00383554	0.00106485	-2.1167	0.000141	1.15514e-05
320614	A330033J07Rik	0	0.641559	0.100201	0.315751	0	1	1	0	1	1	0	1	1	0	1	1	0	1	1	0	1	1
319727	A330035P11Rik	0.208985	0.210602	0.239605	0.542308	0	1	1	-0.78722	0.398719	0.262455	-1.88287	0.0618696	0.0226832	0.275477	0.673205	0.55582	-0.827042	0.235115	0.166337	-1.08072	0.0272812	0.00953802
74333	A330040F15Rik	0.311372	0	0.627241	1.1772	0	1	1	-1.03419	0.203288	0.106414	-2.23997	0.0111537	0.00249984	-1.30641	0.0479305	0.0179445	-2.51541	0.00134992	0.000289311	-1.225	0.0122197	0.00343004
319556	A330041J22Rik	0.0538436	0	0.276591	0.75314	0	1	1	-1.90485	0.0584689	0.0208797	-3.31028	0.0069892	0.00137862	-1.21422	0.0980611	0.0436605	-2.66258	0.006703	0.00213972	-1.42382	0.0205186	0.0066896
320315	A330048O09Rik	0	0	0	0.0554208	0	1	1	0	1	1	0	1	1	0	1	1	0	1	1	0	1	1
327768	A330049N07Rik	0	0	0	0.0567315	0	1	1	0	1	1	0	1	1	0	1	1	0	1	1	0	1	1
606735	A330069E16Rik	0	0.137473	0.251488	0.373633	0	1	1	0	1	1	0	1	1	0	1	1	0	1	1	0	1	1
381673	A330070K13Rik	0	1.66271	0.0686944	1.66662	0	1	1	0	1	1	-3.88636	0.00742875	0.00149299	0	1	1	0.521798	0.593196	0.513506	-3.62431	0.00658003	0.00153879
434353	A330074K22Rik	0.0199512	1.85295	0.277975	0.0224432	-5.49951	5.62202e-06	2.38336e-07	-2.77943	0.0035318	0.000591914	0	1	1	2.71654	1.87099e-07	4.14494e-09	5.73229	4.66371e-08	8.28142e-10	3.00528	0.000275351	2.6601e-05
100503592	A330076C08Rik	0.122764	0	0.00801169	0	0	1	1	0	1	1	0	1	1	0	1	1	0	1	1	0	1	1
320026	A330076H08Rik	3.65445	3.99822	5.69415	35.6796	-0.126349	0.910794	0.862388	-0.494135	0.475818	0.335005	-3.08087	0.00649097	0.00125251	-0.359027	0.226926	0.127779	-2.96101	0.0081779	0.00272783	-2.60372	0.00168798	0.000274169
107003	A330093E20Rik	1.38995	1.26886	0.722035	5.25814	0.594017	0.405848	0.275228	1.03145	0.0423402	0.0136809	-1.99717	0.00173768	0.000246913	0.444272	0.471554	0.337509	-2.59128	0.00262675	0.000667362	-3.02637	2.58873e-05	1.36097e-06
77920	A330102I10Rik	0.611356	1.42658	0.981844	2.94204	-0.963504	0.144574	0.0694616	-0.495573	0.370575	0.237117	-2.13919	0.00298052	0.000472132	0.446305	0.254616	0.148795	-1.18653	0.0370643	0.0176968	-1.6313	0.000629051	7.6361e-05
215493	A3galt2	0	0	0.00853459	0.0137649	0	1	1	0	1	1	0	1	1	0	1	1	0	1	1	0	1	1
97159	A430005L14Rik	0.405144	1.50481	0.887136	0.828641	0	1	1	-0.847634	0.249794	0.140161	-0.632224	0.476699	0.341848	0.629475	0.168107	0.0864058	0.82742	0.115727	0.0707059	0.2144	0.650909	0.544702
319665	A430010J10Rik	0	0	0.0106511	0.0659226	0	1	1	0	1	1	0	1	1	0	1	1	0	1	1	0	1	1
243308	A430033K04Rik	5.88012	2.90486	6.42731	8.29337	0.931079	0.010796	0.00261881	-0.0983224	0.709922	0.595689	-0.434112	0.140637	0.0664428	-1.02831	0.000170775	1.82113e-05	-1.36899	0.000164572	2.06137e-05	-0.332081	0.124109	0.063926
320312	A430035B10Rik	1.83446	0.691965	1.02767	0.787638	1.32684	0.0894489	0.0374147	0.750162	0.137671	0.0638235	0.887192	0.113317	0.050163	-0.571414	0.375962	0.249095	-0.444049	0.434605	0.350991	0.138032	0.773583	0.692095
654440	A430046D13Rik	1.3196	1.00612	1.3692	1.24694	0.128375	0.866903	0.800752	-0.0428114	0.943372	0.909964	0.0439472	0.947497	0.91822	-0.183365	0.753412	0.652012	-0.0819957	0.885655	0.85154	0.0858655	0.853833	0.792871
381426	A430048G15Rik	0	0	0	0	0	1	1	0	1	1	0	1	1	0	1	1	0	1	1	0	1	1
319486	A430057M04Rik	0.0404431	0.184048	0.13071	0.163254	0	1	1	-2.3351	0.0122198	0.00278789	-2.53167	0.0118698	0.0027051	0.772292	0.172597	0.0895735	0.571669	0.310517	0.232602	-0.19998	0.650124	0.543818
100039739	A430060F13Rik	0	0	0	0	0	1	1	0	1	1	0	1	1	0	1	1	0	1	1	0	1	1
319493	A430078G23Rik	0	0	0	0	0	1	1	0	1	1	0	1	1	0	1	1	0	1	1	0	1	1
320486	A430078I02Rik	0.0605182	0.147214	0.124766	0.0717573	0	1	1	0	1	1	0	1	1	0	1	1	0	1	1	0	1	1
623726	A430085M09Rik	0	0	0	0	0	1	1	0	1	1	0	1	1	0	1	1	0	1	1	0	1	1
106059	A430088P11Rik	0	0	0	0	0	1	1	0	1	1	0	1	1	0	1	1	0	1	1	0	1	1
331195	A430089I19Rik	0	0	0	0	0	1	1	0	1	1	0	1	1	0	1	1	0	1	1	0	1	1
319803	A430090L17Rik	0.321779	0.0739328	0.0761147	0.139276	1.9552	0.187061	0.0969928	2.17745	0.0368201	0.0114594	1.39958	0.255675	0.146847	0	1	1	0	1	1	-0.755584	0.392784	0.279312
403202	A430093F15Rik	0	0	0	0	0	1	1	0	1	1	0	1	1	0	1	1	0	1	1	0	1	1
214239	A430105I19Rik	0.72508	0.172363	0.184099	0.233481	1.5518	0.0667087	0.025802	1.84253	0.00351049	0.00058769	1.56654	0.02489	0.00696065	0.302765	0.58699	0.458489	0.0119586	0.984235	0.978065	-0.288237	0.531735	0.416096
77189	A430105J06Rik	0.0839459	0.116832	0.140276	0.12141	0	1	1	-1.1404	0.288999	0.170283	-0.803104	0.594844	0.465137	0.0844719	0.921509	0.876863	0	1	1	0.372171	0.685104	0.583796
319650	A430108G06Rik	0.327974	0.930311	0.468291	0.351159	0	1	1	-0.714975	0.299965	0.17901	0	1	1	0.775396	0.142992	0.0704231	0	1	1	0.424604	0.398572	0.284645
329307	A430110L20Rik	0.388923	0.0427419	0.234806	0.74125	1.93002	0.106988	0.0471996	1.199	0.154995	0.0745325	-0.717869	0.31872	0.198632	-0.759424	0.344558	0.2215	-2.66428	0.000463658	7.44474e-05	-1.92077	0.00118854	0.000175826
239559	A4galt	0	0	0.0375784	0	0	1	1	0	1	1	0	1	1	0	1	1	0	1	1	0	1	1
333424	A4gnt	0	0	0.0396417	0	0	1	1	0	1	1	0	1	1	0	1	1	0	1	1	0	1	1
328265	A530001N23Rik	0	0	0	0	0	1	1	0	1	1	0	1	1	0	1	1	0	1	1	0	1	1
381384	A530006G24Rik	0	0	0	0	0	1	1	0	1	1	0	1	1	0	1	1	0	1	1	0	1	1
329562	A530013C23Rik	0.170011	0	0.00887251	0	0	1	1	0	1	1	0	1	1	0	1	1	0	1	1	0	1	1
319942	A530016L24Rik	0.024837	0	0.0286264	0.154613	0	1	1	0	1	1	0	1	1	0	1	1	0	1	1	0	1	1
319839	A530020G20Rik	0	0	0	0	0	1	1	0	1	1	0	1	1	0	1	1	0	1	1	0	1	1
330578	A530021J07Rik	0	0	0	0	0	1	1	0	1	1	0	1	1	0	1	1	0	1	1	0	1	1
381287	A530032D15Rik	0	0	0.00518845	0	0	1	1	0	1	1	0	1	1	0	1	1	0	1	1	0	1	1
328190	A530046M15Rik	1.47127	0	0.216179	2.01084	3.43992	0.00928467	0.00215308	2.49307	0.00502534	0.000918138	-0.469877	0.576189	0.444986	0	1	1	-3.91365	0.00156205	0.000346507	-2.97873	0.000838699	0.000111544
442846	A530050N04Rik	0	0.244944	0.0238438	0.0551649	0	1	1	0	1	1	0	1	1	0	1	1	0	1	1	0	1	1
208079	A530053G22Rik	0	0	0	0	0	1	1	0	1	1	0	1	1	0	1	1	0	1	1	0	1	1
320846	A530058N18Rik	0.176446	5.4421	5.22369	17.9815	-4.74839	7.76863e-06	3.64146e-07	-4.37675	7.80664e-05	5.19736e-06	-6.31178	2.49979e-05	1.33991e-06	0.344755	0.35328	0.228983	-1.57559	0.00252082	0.000633217	-1.92822	0.000225959	2.06944e-05
328830	A530064D06Rik	0	0	0	0	0	1	1	0	1	1	0	1	1	0	1	1	0	1	1	0	1	1
328263	A530065N20Rik	0	0	0	0.151569	0	1	1	0	1	1	-2.87034	0.0265738	0.00758102	0	1	1	0	1	1	0	1	1
100415915	A530072M11Rik	0.121884	0	0.0719891	0.0645183	0	1	1	0	1	1	0	1	1	0	1	1	0	1	1	0	1	1
320367	A530076I17Rik	0	0	0	0	0	1	1	0	1	1	0	1	1	0	1	1	0	1	1	0	1	1
664702	A530088E08Rik	0	0	0	0	0	1	1	0	1	1	0	1	1	0	1	1	0	1	1	0	1	1
210373	A530095I07Rik	0	0	0.0339646	0	0	1	1	0	1	1	0	1	1	0	1	1	0	1	1	0	1	1
319293	A530099J19Rik	0	0	0.00697149	0	0	1	1	0	1	1	0	1	1	0	1	1	0	1	1	0	1	1
319997	A630001G21Rik	0	0	0.0363992	0.029765	0	1	1	0	1	1	0	1	1	0	1	1	0	1	1	0	1	1
414091	A630001O12Rik	0	0	0	0	0	1	1	0	1	1	0	1	1	0	1	1	0	1	1	0	1	1
545280	A630010A05Rik	0	0	0	0	0	1	1	0	1	1	0	1	1	0	1	1	0	1	1	0	1	1
100504594	A630012P03Rik	0	0	0	0	0	1	1	0	1	1	0	1	1	0	1	1	0	1	1	0	1	1
408254	A630019I02Rik	0.688099	0.183634	0.225779	0.0463626	2.55062	0.0103231	0.00246853	1.5539	0.00900093	0.00189581	3.75598	0.000255231	2.34984e-05	-0.921743	0.322651	0.202257	0	1	1	2.18407	0.0200551	0.00649006
328489	A630020A06	0	0.123842	0.0459648	0.1858	0	1	1	0	1	1	0	1	1	0	1	1	0	1	1	0	1	1
105518	A630023A22Rik	0	0	0	0	0	1	1	0	1	1	0	1	1	0	1	1	0	1	1	0	1	1
231603	A630023P12Rik	0.0587356	0	0	0	0	1	1	0	1	1	0	1	1	0	1	1	0	1	1	0	1	1
320659	A630031M04Rik	0	0	0	0	0	1	1	0	1	1	0	1	1	0	1	1	0	1	1	0	1	1
329790	A630034I12Rik	0.0729335	0.0732669	0.204444	0.568414	0	1	1	-1.57825	0.108974	0.0470453	-2.87981	0.00812836	0.00167047	-1.38467	0.0487986	0.0183462	-2.68776	0.00213904	0.000515549	-1.2954	0.00611808	0.00140327
320642	A630066F11Rik	0.913317	0.47056	0.475617	0.590975	1.11565	0.204453	0.1089	1.12388	0.108166	0.0465691	0.830736	0.254173	0.145727	0.0223856	0.983149	0.972245	-0.283544	0.735433	0.66858	-0.286738	0.705543	0.608159
100038467	A630072L19Rik	0.106849	0.0764624	0.0934353	0.0185077	0	1	1	0	1	1	0	1	1	0	1	1	0	1	1	0	1	1
320770	A630072M18Rik	1.074	0.464325	0.498637	0.609125	1.42328	0.0270489	0.00818535	1.3966	0.00180425	0.000256551	1.02768	0.0420222	0.0138192	-0.0205603	0.958964	0.934262	-0.399879	0.346027	0.26492	-0.369011	0.225947	0.136668
381819	A630073D07Rik	0	0	0	0	0	1	1	0	1	1	0	1	1	0	1	1	0	1	1	0	1	1
100043910	A630075F10Rik	0	0.0291134	0.033123	0	0	1	1	0	1	1	0	1	1	0	1	1	0	1	1	0	1	1
319929	A630076J17Rik	0	0	0	0	0	1	1	0	1	1	0	1	1	0	1	1	0	1	1	0	1	1
319973	A630077J23Rik	0	0	0	0	0	1	1	0	1	1	0	1	1	0	1	1	0	1	1	0	1	1
320586	A630089N07Rik	1.00199	0.545124	0.675553	0.981395	1.05362	0.307607	0.188016	0.595743	0.352238	0.222003	0.0183032	0.982523	0.971937	-0.45812	0.490272	0.356368	-1.03578	0.120317	0.0741363	-0.564716	0.169203	0.0948959
235973	A630095E13Rik	0	0	0	0	0	1	1	0	1	1	0	1	1	0	1	1	0	1	1	0	1	1
381272	A630095N17Rik	0	0	0.0665785	0.182854	0	1	1	0	1	1	0	1	1	0	1	1	0	1	1	0	1	1
320449	A730004F24Rik	0	0	0	0	0	1	1	0	1	1	0	1	1	0	1	1	0	1	1	0	1	1
320638	A730006G06Rik	0	0	0	0	0	1	1	0	1	1	0	1	1	0	1	1	0	1	1	0	1	1
212427	A730008H23Rik	2.33677	2.42667	3.236	6.56664	0.00447371	0.995333	0.992684	-0.288032	0.531551	0.391532	-1.45459	0.0022155	0.000331389	-0.295803	0.406027	0.276092	-1.4566	0.000118523	1.38662e-05	-1.16658	2.99157e-05	1.64315e-06
402727	A730009L09Rik	0	0	0.366628	1.0477	0	1	1	-3.65397	0.00014519	1.10609e-05	-4.91754	2.85572e-05	1.59191e-06	-1.66253	0.0165595	0.00480406	-2.92632	0.00102959	0.000204975	-1.2413	0.0174167	0.00539682
319916	A730011C13Rik	1.03359	0.63804	0.653643	1.10568	0.489301	0.467978	0.336169	0.587521	0.153995	0.0738037	-0.334187	0.476383	0.341561	0.0701954	0.906155	0.855137	-0.823289	0.125792	0.0782505	-0.920059	0.0065842	0.00154117
320952	A730013G03Rik	0	0	0.00959078	0	0	1	1	0	1	1	0	1	1	0	1	1	0	1	1	0	1	1
225583	A730017C20Rik	5.25604	1.18154	7.66946	9.47442	2.04935	0.00120075	0.000177956	-0.431472	0.13766	0.0638099	-0.85645	0.00709396	0.00140466	-2.48686	2.4269e-07	5.72644e-09	-2.90216	2.95183e-08	4.48861e-10	-0.418087	0.0130867	0.00375769
613258	A730017L22Rik	1.43246	0.694264	0.61848	0.540539	0.365158	0.822036	0.741856	0.436828	0.673727	0.548671	0.719673	0.564323	0.432833	0.0679679	0.913869	0.865856	0.350068	0.558394	0.476515	0.291203	0.448449	0.332013
100504733	A730018C14Rik	0	0	0.0470782	0	0	1	1	0	1	1	0	1	1	0	1	1	0	1	1	0	1	1
100504262	A730020E08Rik	1.75253	4.69136	4.13217	5.11146	-1.48034	0.0047052	0.000946099	-1.3279	0.0158442	0.00387472	-1.4544	0.029885	0.0088365	0.159252	0.73725	0.63099	0.0317863	0.95667	0.942363	-0.137824	0.804271	0.728471
100503044	A730020M07Rik	0	0	0	0	0	1	1	0	1	1	0	1	1	0	1	1	0	1	1	0	1	1
329513	A730036I17Rik	0	0	0	0.0108021	0	1	1	0	1	1	0	1	1	0	1	1	0	1	1	0	1	1
330958	A730043L09Rik	0	0	0.135784	0.0307747	0	1	1	0	1	1	0	1	1	0	1	1	0	1	1	0	1	1
319764	A730046J19Rik	0.10965	0	1.0194	0.0685485	0	1	1	-3.27436	0.00011088	7.97644e-06	0	1	1	-4.70549	9.10902e-07	2.97325e-08	0	1	1	3.97096	1.07374e-05	4.52128e-07
74516	A730049H05Rik	0.0162	0	0.0118182	0.00927125	0	1	1	0	1	1	0	1	1	0	1	1	0	1	1	0	1	1
319783	A730056A06Rik	0.0506149	0	0.0666642	0.286374	0	1	1	0	1	1	-2.17491	0.0331687	0.0101297	0	1	1	-2.18672	0.00639038	0.00201206	-1.79719	0.0175224	0.0054404
100504703	A730063M14Rik	0	0	0.0542137	0	0	1	1	0	1	1	0	1	1	0	1	1	0	1	1	0	1	1
619311	A730065G17Rik	0	0	0.102716	0	0	1	1	0	1	1	0	1	1	0	1	1	0	1	1	0	1	1
101786	A730082K24Rik	0	0	0	0	0	1	1	0	1	1	0	1	1	0	1	1	0	1	1	0	1	1
100504650	A730085E03Rik	0	0	0.0193983	0.0463544	0	1	1	0	1	1	0	1	1	0	1	1	0	1	1	0	1	1
654800	A730085K08Rik	0	0.108326	0.15798	0.110905	0	1	1	0	1	1	0	1	1	0	1	1	0	1	1	0	1	1
319798	A730090N16Rik	0.781508	0.501385	0.667525	1.56099	0.801178	0.426651	0.295218	0.553216	0.428563	0.290898	-0.693273	0.318066	0.197924	-0.278397	0.638631	0.516189	-1.50386	0.0144657	0.0055474	-1.23777	0.00519562	0.00114053
442803	A830005F24Rik	0.376956	0.301924	0.523761	0.336012	0	1	1	-1.03717	0.27446	0.158844	-0.585758	0.615792	0.488479	-0.27936	0.578962	0.449752	0	1	1	0.452695	0.250625	0.156235
320297	A830009L08Rik	0.057716	0	0.14637	0.0193968	0	1	1	-1.37961	0.152529	0.0729185	0	1	1	0	1	1	0	1	1	0	1	1
231570	A830010M20Rik	29.5966	33.0159	33.0388	31.7002	-0.117997	0.630203	0.508881	-0.103562	0.71225	0.598216	0.0357277	0.921134	0.880574	0.00260449	0.991535	0.985231	0.145144	0.551641	0.469848	0.140462	0.633803	0.525134
319702	A830011K09Rik	0.814873	0.706762	0.472554	0.317977	0.376123	0.595229	0.466681	1.14301	0.029437	0.00855299	1.88374	0.00980971	0.0021185	0.76974	0.03935	0.0140099	1.50955	0.00147097	0.000321378	0.74218	0.0593311	0.0254071
320492	A830018L16Rik	15.1261	6.27582	9.11981	18.965	1.19	0.000190289	1.85213e-05	0.769404	0.00315821	0.000514776	-0.152956	0.594124	0.464455	-0.428181	0.0331754	0.0113223	-1.34712	2.99925e-05	2.65061e-06	-0.917118	0.000831589	0.000109965
320072	A830019L24Rik	0	0	0.0263217	0	0	1	1	0	1	1	0	1	1	0	1	1	0	1	1	0	1	1
329056	A830019P07Rik	0	0	0.046319	0.689084	0	1	1	0	1	1	0	1	1	0	1	1	0	1	1	0	1	1
442842	A830035A12Rik	0	0	0	0	0	1	1	0	1	1	0	1	1	0	1	1	0	1	1	0	1	1
100101457	A830035O19Rik	0.543389	0.319017	0.327412	0.619681	0.756302	0.341054	0.21603	0.953991	0.087235	0.0353326	-0.126436	0.845946	0.773397	0.194172	0.776029	0.681431	-0.881027	0.155631	0.101125	-1.08644	0.0195533	0.00628165
319915	A830049F12Rik	0.526468	0	0.453903	0.995877	0	1	1	-0.247759	0.851088	0.780382	-1.0708	0.398801	0.268228	0	1	1	0	1	1	-0.82555	0.314671	0.209021
402767	A830052D11Rik	0	0.205274	0.254521	0.16686	0	1	1	0	1	1	0	1	1	0	1	1	0	1	1	0	1	1
320174	A830082K12Rik	4.95951	5.6704	6.08552	10.0705	0.1312	0.780232	0.689554	-0.039279	0.920382	0.875707	-1.01576	0.0109797	0.00245102	-0.16395	0.532813	0.39899	-1.14266	0.00116794	0.000240975	-0.993492	0.000812053	0.000106705
414093	A830082N09Rik	1.76437	1.90684	2.85184	3.70813	-0.262778	0.369575	0.24184	-0.800899	0.00366559	0.000620236	-0.934122	0.0193163	0.00504285	-0.534677	0.0190643	0.00567542	-0.668387	0.0698558	0.0383677	-0.137455	0.685982	0.584629
100379095	A830092H15Rik	1.44941	0.55696	2.71503	3.24029	0	1	1	-0.325315	0.636771	0.505685	-0.710057	0.319022	0.198921	-1.47711	0.0154948	0.00441576	-1.89384	0.0063304	0.00198619	-0.386715	0.280686	0.180398
77127	A930001A20Rik	0	0	0	0	0	1	1	0	1	1	0	1	1	0	1	1	0	1	1	0	1	1
319314	A930001C03Rik	2.58196	2.40614	1.75557	1.30307	-0.611067	0.594424	0.465476	-0.125192	0.900645	0.848453	0.457968	0.687099	0.570936	0.526822	0.144036	0.0709935	1.09265	0.0182619	0.00743596	0.555532	0.127952	0.0664201
319467	A930002C04Rik	0.109516	0.298687	0.331871	0.890171	0	1	1	-1.57889	0.094792	0.0392502	-3.58902	0.00160976	0.000222918	0.349157	0.66059	0.540569	-1.65373	0.0415432	0.02038	-2.0186	0.00184709	0.000309507
68162	A930003A15Rik	0	0.0544518	0.396561	0	0	1	1	0	1	1	0	1	1	0	1	1	0	1	1	0	1	1
330052	A930003O13Rik	0.101674	0.183417	1.55877	0.952626	0	1	1	-4.04291	7.15176e-05	4.66111e-06	-3.60114	0.000772683	9.04628e-05	-2.74392	0.000297383	3.53382e-05	-2.32959	0.00425344	0.00121572	0.444899	0.248101	0.154271
77940	A930004D18Rik	0.711544	0.839343	0.313707	0.34881	-0.774714	0.489897	0.356878	0.444404	0.669649	0.543015	0.458889	0.69407	0.579223	1.26299	0.00860305	0.00213822	1.24826	0.0146366	0.00562563	-0.0134012	0.979335	0.969086
68161	A930005H10Rik	1.26382	1.47812	1.06407	0.91311	0.127586	0.892641	0.835663	0.541973	0.377592	0.243581	0.587566	0.431704	0.298012	0.423197	0.39843	0.269404	0.477639	0.402677	0.3191	0.0498796	0.92326	0.888442
319854	A930006I01Rik	0	0	0	0	0	1	1	0	1	1	0	1	1	0	1	1	0	1	1	0	1	1
100503120	A930006K02Rik	0.137207	0.0788082	0.195775	0.532687	0	1	1	0	1	1	0	1	1	0	1	1	0	1	1	0	1	1
432999	A930007A09Rik	0.0857096	0.108812	0.165211	0.291458	0	1	1	0	1	1	0	1	1	0	1	1	0	1	1	-0.827506	0.0800589	0.037107
77779	A930007I19Rik	0.228393	0.164673	0.0770531	0.264766	0.287555	0.862985	0.796061	1.49724	0.223759	0.121492	-0.0315722	0.982568	0.972122	0	1	1	0	1	1	0	1	1
77798	A930009A15Rik	0	0.0420275	0.0143558	0.0193563	0	1	1	0	1	1	0	1	1	0	1	1	0	1	1	0	1	1
319818	A930011G23Rik	0.142708	0	0.0533652	0.0347717	0	1	1	1.75573	0.0601407	0.0216815	0	1	1	0	1	1	0	1	1	0	1	1
626275	A930012L18Rik	1.46482	0.310538	0.844339	3.20296	2.449	0.0501496	0.0178965	0.826869	0.155009	0.074568	-1.14305	0.0430263	0.0142336	-1.62643	0.0158996	0.00456611	-3.59253	0.00010429	1.18806e-05	-1.96875	7.18493e-06	2.72733e-07
227923	A930012O16Rik	0.439992	0	0.301394	0.47951	0	1	1	0.146602	0.902651	0.851862	0	1	1	0	1	1	0	1	1	0	1	1
68074	A930013F10Rik	1.36792	0.5517	0.524387	3.19343	1.17203	0.251581	0.143922	1.12174	0.0737604	0.0283771	-1.17903	0.0478163	0.0163157	-0.062988	0.937456	0.90188	-2.35922	0.00308277	0.000816905	-2.30916	6.03332e-05	3.92284e-06
77810	A930015D03Rik	0.739234	2.75959	1.5775	0.833948	-1.69432	0.0097187	0.00228246	-0.816582	0.153011	0.0731995	-0.0800045	0.917995	0.876605	0.876692	0.0680118	0.0275667	1.61861	0.00553716	0.00168437	0.742953	0.145539	0.0782576
100503495	A930016O22Rik	0.0120551	0	0.0966573	0.0883253	0	1	1	0	1	1	0	1	1	0	1	1	0	1	1	0	1	1
100034748	A930017K11Rik	0	0	0	0	0	1	1	0	1	1	0	1	1	0	1	1	0	1	1	0	1	1
239410	A930017M01Rik	1.9432	2.72542	2.71296	3.49429	-0.792555	0.0822288	0.0337089	-0.735129	0.0478008	0.0160461	-1.11355	0.00751105	0.00151661	0.0591057	0.820232	0.735881	-0.320364	0.141709	0.090421	-0.380239	0.0460788	0.0185211
68243	A930018P22Rik	0	0	0	0	0	1	1	0	1	1	0	1	1	0	1	1	0	1	1	0	1	1
77806	A930019D19Rik	0.342967	0	0.0453899	0.416443	0	1	1	0	1	1	0	1	1	0	1	1	0	1	1	0	1	1
109202	A930024E05Rik	0.224689	0.233575	0.231667	0.749744	0	1	1	-0.588766	0.587832	0.452266	-2.29081	0.0205768	0.00546406	0.223502	0.766601	0.669074	-1.50009	0.0120301	0.00443756	-1.72165	0.00174116	0.00028518
78438	A930028N01Rik	4.66561	6.05237	2.86962	8.23067	-0.39265	0.394021	0.26384	0.656678	0.0770191	0.0300281	-0.757344	0.126532	0.0580142	1.0478	0.00173338	0.000300934	-0.359623	0.451331	0.367334	-1.41107	0.00171382	0.000279622
77835	A930031H19Rik	0	0	0	0	0	1	1	0	1	1	0	1	1	0	1	1	0	1	1	0	1	1
320700	A930033H14Rik	0.123257	1.10064	0.73808	1.00998	-3.18147	0.00566579	0.00118494	-2.78406	0.00965863	0.00206842	-3.24789	0.00205274	0.00030109	0.420365	0.471075	0.337011	-0.0517083	0.910071	0.882039	-0.478536	0.235106	0.143882
320946	A930035D04Rik	0.662574	0.75733	1.172	1.7853	-0.38508	0.604661	0.478422	-0.958452	0.0847922	0.0340329	-1.69989	0.00293337	0.000463922	-0.580311	0.254763	0.148897	-1.31324	0.00385112	0.00107022	-0.740911	0.0230934	0.00772782
320323	A930038B10Rik	0	0	0	0	0	1	1	0	1	1	0	1	1	0	1	1	0	1	1	0	1	1
78443	A930041C12Rik	0	0	0.187699	0.0688373	0	1	1	0	1	1	0	1	1	0	1	1	0	1	1	0	1	1
546058	AA386476	0.0429037	0	0.0660717	0.0747608	0	1	1	0	1	1	0	1	1	0	1	1	0	1	1	0	1	1
102633593	AA387200	0.509654	0.423584	0.291614	0.549291	-0.029514	0.987619	0.979839	0.463379	0.726826	0.616893	-0.682653	0.596645	0.467067	0	1	1	-0.64973	0.473552	0.38943	-1.13914	0.129698	0.0675437
100043450	AA387883	0.0223416	0	0.0417252	0.632512	0	1	1	0	1	1	-3.22777	0.00622341	0.00118597	0	1	1	-2.36864	0.00496755	0.0014721	-3.78023	0.000766797	9.91912e-05
433100	AA388235	1.63745	0.586003	1.43281	1.24607	1.74907	0.0123866	0.00309943	0.169657	0.632825	0.501535	0.384625	0.342931	0.218933	-1.56573	0.000719615	0.000103728	-1.36721	0.00605536	0.00187711	0.218971	0.318376	0.212349
100359413	AA413626	0.201232	0	0	1.11803	0	1	1	0	1	1	0	1	1	0	1	1	0	1	1	-2.65193	0.0370013	0.0140476
245350	AA414768	1.97948	2.22431	3.33012	3.13083	-0.403482	0.654671	0.538104	-1.12974	0.0681483	0.0255134	-1.15859	0.0761426	0.0296734	-0.702385	0.080177	0.0339217	-0.75094	0.0517968	0.026712	-0.0485631	0.863888	0.805911
613254	AA465934	2.4861	9.93941	1.70846	4.09375	-0.995746	0.45393	0.322135	0.590726	0.475278	0.334507	-0.659596	0.412577	0.281373	1.58554	0.115047	0.0532593	0.300621	0.773859	0.713449	-1.23662	0.0109656	0.00296803
433470	AA467197	0.0855667	0	0.374367	0.437676	0	1	1	-1.25581	0.243295	0.135249	-1.97752	0.0988083	0.0418098	0	1	1	0	1	1	-0.725341	0.258481	0.162477
380934	AA536875	0	0	0	0	0	1	1	0	1	1	0	1	1	0	1	1	0	1	1	0	1	1
100272219	AA543186	0.0405685	0.0361514	0.039365	0.0234843	0	1	1	0	1	1	0	1	1	0	1	1	0	1	1	0	1	1
100417434	AA543401	0.030864	0	0	0.0433839	0	1	1	0	1	1	0	1	1	0	1	1	0	1	1	0	1	1
57866	AA545190	0	0	0	0	0	1	1	0	1	1	0	1	1	0	1	1	0	1	1	0	1	1
241051	AA619741	0	0	0	0	0	1	1	0	1	1	0	1	1	0	1	1	0	1	1	0	1	1
544808	AA623943	0	0	0	0	0	1	1	0	1	1	0	1	1	0	1	1	0	1	1	0	1	1
100040632	AA684185	0	0	0	0	0	1	1	0	1	1	0	1	1	0	1	1	0	1	1	0	1	1
102641946	AA692955	1.02639	0.472907	0.411803	0.578425	1.03298	0.239586	0.134797	1.04216	0.121841	0.054433	0.680868	0.336892	0.213782	-0.0176638	0.983217	0.972455	-0.364347	0.542808	0.460175	-0.366176	0.517378	0.401402
100554	AA792892	0	0	0	0	0	1	1	0	1	1	0	1	1	0	1	1	0	1	1	0	1	1
212439	AA986860	0.159341	0.0375847	0.257082	0.205716	0	1	1	-1.05235	0.224256	0.121819	-0.572416	0.614685	0.487236	-1.25323	0.0494745	0.0186685	0	1	1	0.489307	0.430657	0.314599
223921	Aaas	2.07492	1.14709	1.80922	1.43428	0.323387	0.667177	0.553168	-0.144846	0.779428	0.686101	0.142838	0.815741	0.73246	-0.474724	0.295498	0.180317	-0.174759	0.712561	0.643602	0.291861	0.375901	0.263613
78894	Aacs	1.00713	0.856314	1.27373	1.58705	0.185633	0.745042	0.645973	-0.160369	0.698334	0.581685	-0.498295	0.189609	0.0991568	-0.350515	0.403245	0.273526	-0.684589	0.0545667	0.0284275	-0.334068	0.191038	0.110454
67758	Aadac	0	0	0	0	0	1	1	0	1	1	0	1	1	0	1	1	0	1	1	0	1	1
639634	Aadacl2	0	0	0	0	0	1	1	0	1	1	0	1	1	0	1	1	0	1	1	0	1	1
230883	Aadacl3	0	0	0	0	0	1	1	0	1	1	0	1	1	0	1	1	0	1	1	0	1	1
435815	Aadacl4	0	0	0	0	0	1	1	0	1	1	0	1	1	0	1	1	0	1	1	0	1	1
23923	Aadat	0	0	0.0465404	0.0352505	0	1	1	0	1	1	0	1	1	0	1	1	0	1	1	0	1	1
[truncated: 34,529 more rows]

## Sheet: Figure 1-3
Human.Symbol	Human.EntrezID	Mouse.Symbol	Mouse.EntrezID	Description	Druggability.Tier	No.of.GWAS.regions	Small.Mol.Druggable	Bio.Druggable	ADME.gene	Upreg.in.neuron.subtype	rpkm.EXC	rpkm.PV	rpkm.SST	rpkm.VIP	lfc.EXC.vs.PV	adj.p.EXC.vs.PV	pval.EXC.vs.PV	lfc.EXC.vs.SST	adj.p.EXC.vs.SST	pval.EXC.vs.SST	lfc.EXC.vs.VIP	adj.p.EXC.vs.VIP	pval.EXC.vs.VIP	lfc.PV.vs.SST	adj.p.PV.vs.SST	pval.PV.vs.SST	lfc.PV.vs.VIP	adj.p.PV.vs.VIP	pval.PV.vs.VIP	lfc.SST.vs.VIP	adj.p.SST.vs.VIP	pval.SST.vs.VIP
RAMP1	10267	Ramp1	51801	receptor (G protein-coupled) activity modifying protein 1 [Source:HGNC Symbol;Acc:9843]	Tier 1	0	Y	Y	N	EXC	4.2808	1.44509	1.43805	0.510359	1.87275	0.0112241	0.00275385	1.60067	0.00274944	0.000431004	2.87786	0.000132165	1.06346e-05	-0.273098	0.698268	0.585498	1.00019	0.0677667	0.0370306	1.29116	0.0254072	0.00873495
PAK4	10298	Pak4	70584	p21 protein (Cdc42/Rac)-activated kinase 4 [Source:HGNC Symbol;Acc:16059]	Tier 1	0	Y	N	N	EXC	2.36498	0.515756	0.381752	0.652303	2.35087	0.00115623	0.000170242	2.63962	8.08424e-06	2.93299e-07	1.94262	0.000390423	3.93427e-05	0.296484	0.539663	0.407456	-0.407612	0.346766	0.265652	-0.699826	0.0465313	0.018775
ADCY1	107	Adcy1	432530	adenylate cyclase 1 (brain) [Source:HGNC Symbol;Acc:232]	Tier 1	0	Y	N	N	EXC	66.9742	20.3393	11.7567	11.7602	1.77393	4.63082e-06	1.87059e-07	2.5228	5.25074e-09	1.72294e-11	2.54724	1.78459e-08	1.27165e-10	0.758715	0.000149397	1.55852e-05	0.779789	0.000566336	9.53048e-05	0.0162104	0.915443	0.877633
MAP4K5	11183	Map4k5	399510	mitogen-activated protein kinase kinase kinase kinase 5 [Source:HGNC Symbol;Acc:6867]	Tier 1	0	Y	N	N	EXC	6.63568	0.960981	2.48737	2.80524	2.7405	1.86742e-06	6.11447e-08	1.47994	6.52743e-06	2.2631e-07	1.20131	0.00675594	0.00131898	-1.26296	0.00069784	9.97567e-05	-1.5414	0.0143724	0.00550671	-0.277401	0.497278	0.380757
CHRM1	1128	Chrm1	12669	cholinergic receptor, muscarinic 1 [Source:HGNC Symbol;Acc:1950]	Tier 1	0	Y	N	N	EXC	22.1485	3.82809	4.59425	4.14264	2.35262	1.16005e-06	3.27376e-08	2.03127	7.95658e-07	1.53201e-08	2.22132	1.85547e-06	5.06633e-08	-0.312335	0.212563	0.117323	-0.135847	0.630596	0.554323	0.196223	0.488306	0.371045
CLCN2	1181	Clcn2	12724	chloride channel, voltage-sensitive 2 [Source:HGNC Symbol;Acc:2020]	Tier 1	1	Y	N	N	EXC	5.14187	0.96585	1.24285	1.61882	2.28324	1.60256e-05	9.0107e-07	2.02591	5.17026e-07	8.68733e-09	1.58907	5.27732e-05	3.47096e-06	-0.253515	0.406027	0.276105	-0.694424	0.0398095	0.0193583	-0.432449	0.0829466	0.0387536
ADORA1	134	Adora1	11539	adenosine A1 receptor [Source:HGNC Symbol;Acc:262]	Tier 1	0	Y	N	N	EXC	17.0857	4.95503	3.02963	0.379718	1.73885	2.46234e-06	8.65645e-08	2.36885	3.85088e-08	2.86098e-10	5.33421	2.13903e-08	1.59166e-10	0.628191	0.0126199	0.00341202	3.60537	5.82385e-07	2.0234e-08	2.97491	1.19416e-05	5.20583e-07
CSF1	1435	Csf1	12977	colony stimulating factor 1 (macrophage) [Source:HGNC Symbol;Acc:2432]	Tier 1	0	N	Y	N	EXC	4.13587	0.548333	0.927462	1.11981	3.05082	0.000276403	2.93608e-05	2.2437	4.79617e-06	1.53221e-07	1.89128	0.000116388	9.11552e-06	-0.812662	0.040373	0.0144588	-1.15314	0.00776206	0.00256102	-0.345614	0.101296	0.0495094
ADRA1D	146	Adra1d	11550	adrenoceptor alpha 1D [Source:HGNC Symbol;Acc:280]	Tier 1	0	Y	Y	N	EXC	9.17048	2.75826	1.11495	0.63349	1.41379	0.00741901	0.00163753	2.96606	1.23301e-06	2.63366e-08	3.88514	7.8929e-06	3.16343e-07	1.5496	0.000151137	1.582e-05	2.47668	5.6512e-05	5.65043e-06	0.923924	0.0365502	0.0138266
DPYD	1806	Dpyd	99586	dihydropyrimidine dehydrogenase [Source:HGNC Symbol;Acc:3012]	Tier 1	5	Y	N	Y	EXC	1.11261	0.0832576	0.301766	0.0275137	4.05537	0.00218239	0.000368871	2.37136	0.000303122	2.77749e-05	5.49017	0.000253713	2.32626e-05	-1.62392	0.0258036	0.00824491	0	1	1	3.12013	0.0014988	0.000235183
DRD5	1816	Drd5	13492	dopamine receptor D5 [Source:HGNC Symbol;Acc:3026]	Tier 1	0	Y	N	N	EXC	3.64881	0	0.386113	0.0194314	5.62604	5.08865e-05	3.634e-06	3.28863	2.76681e-06	7.52e-08	6.44178	1.24949e-05	5.6494e-07	-2.3111	0.00273439	0.000521356	0	1	1	3.1443	0.00116752	0.000172025
EPHA4	2043	Epha4	13838	EPH receptor A4 [Source:HGNC Symbol;Acc:3388]	Tier 1	0	Y	N	N	EXC	69.951	5.72582	10.8047	7.69835	3.60144	9.91057e-09	5.87515e-11	2.6683	1.44296e-08	6.87888e-11	3.16544	7.31834e-09	3.092e-11	-0.921221	7.65658e-05	6.96996e-06	-0.430002	0.0292942	0.0132826	0.494466	0.0152213	0.00452707
EPHA7	2045	Epha7	13841	EPH receptor A7 [Source:HGNC Symbol;Acc:3390]	Tier 1	0	Y	N	N	EXC	36.1122	6.70121	5.3301	8.42096	2.42909	2.73184e-09	1.05455e-11	2.78366	2.95787e-10	1.83127e-13	2.06008	5.46971e-08	5.13928e-10	0.35564	0.0258083	0.00824809	-0.37012	0.0568599	0.0298707	-0.727685	0.00116752	0.000172067
EPHB1	2047	Ephb1	270190	EPH receptor B1 [Source:HGNC Symbol;Acc:3392]	Tier 1	0	Y	Y	N	EXC	2.61836	0.448408	1.09622	0.242141	2.65231	8.94332e-05	7.38915e-06	1.3986	0.000459185	4.67121e-05	3.30168	1.10171e-05	4.84231e-07	-1.23608	0.0269651	0.00869911	0.639082	0.255766	0.1842	1.91192	0.00201503	0.000344011
EPHB2	2048	Ephb2	13844	EPH receptor B2 [Source:HGNC Symbol;Acc:3393]	Tier 1	0	Y	N	N	EXC	2.06614	0.614298	0.848148	0.823765	1.52672	0.00148169	0.000229807	1.15948	0.000433183	4.34203e-05	1.33964	0.000594623	6.55442e-05	-0.363075	0.275235	0.16456	-0.187036	0.56614	0.484633	0.173771	0.494781	0.378144
FAAH	2166	Faah	14073	fatty acid amide hydrolase [Source:HGNC Symbol;Acc:3553]	Tier 1	0	Y	N	N	EXC	9.61464	2.7491	2.73397	2.35666	1.70084	7.08667e-05	5.5386e-06	1.76738	1.57866e-06	3.59675e-08	1.97922	4.09955e-06	1.41926e-07	0.0690704	0.762169	0.663058	0.279022	0.218102	0.152015	0.213151	0.268048	0.170283
PTK2B	2185	Ptk2b	19229	protein tyrosine kinase 2 beta [Source:HGNC Symbol;Acc:9612]	Tier 1	1	Y	N	N	EXC	98.1548	0.94663	9.75859	1.48678	6.77123	3.2917e-08	2.88169e-10	3.0816	7.20035e-08	6.50849e-10	5.73317	3.60879e-10	4.09625e-13	-3.67329	6.17985e-06	3.12293e-07	-1.03495	0.0192573	0.00792281	2.66454	2.16944e-06	6.3137e-08
FKBP5	2289	Fkbp5	14229	FK506 binding protein 5 [Source:HGNC Symbol;Acc:3721]	Tier 1	1	Y	N	N	EXC	4.85845	0.794512	2.10121	1.43427	2.82011	0.000770887	0.000103674	1.46793	0.000920961	0.000110274	1.81144	0.000639436	7.14306e-05	-1.34978	0.00197949	0.000351345	-1.01325	0.00841089	0.0028268	0.351094	0.187	0.107505
IL17RA	23765	Il17ra	16172	interleukin 17 receptor A [Source:HGNC Symbol;Acc:5985]	Tier 1	0	N	Y	N	EXC	4.15783	0.335751	0.336901	0.15845	4.10792	0.00010258	8.69037e-06	3.76351	2.6948e-07	3.90406e-09	4.6792	2.04521e-06	5.75207e-08	-0.355935	0.592696	0.464616	0.571374	0.367724	0.285449	0.917208	0.0614892	0.0265696
GABRA5	2558	Gabra5	110886	gamma-aminobutyric acid (GABA) A receptor, alpha 5 [Source:HGNC Symbol;Acc:4079]	Tier 1	0	Y	N	N	EXC	34.5186	3.90511	7.21267	2.12745	3.25534	3.32257e-09	1.46581e-11	2.32318	8.31299e-09	3.03657e-11	3.89867	3.18578e-10	2.61163e-13	-0.933467	0.00159767	0.000272578	0.659606	0.0175047	0.00704755	1.58024	8.24648e-06	3.24773e-07
GHSR	2693	Ghsr	208188	growth hormone secretagogue receptor [Source:HGNC Symbol;Acc:4267]	Tier 1	2	Y	Y	N	EXC	0.291455	0	0.0688444	0.0274958	3.32324	0.0212171	0.00606516	2.48567	0.0205616	0.00540136	2.93885	0.0253396	0.00712827	0	1	1	0	1	1	0	1	1
GPD2	2820	Gpd2	14571	glycerol-3-phosphate dehydrogenase 2 (mitochondrial) [Source:HGNC Symbol;Acc:4456]	Tier 1	0	Y	N	N	EXC	28.3641	4.0573	9.30037	9.11779	2.73384	5.6061e-08	6.33763e-10	1.47633	8.70526e-07	1.7262e-08	1.42428	9.97355e-06	4.25156e-07	-1.25318	5.09541e-07	1.42644e-08	-1.29983	1.30811e-05	9.3896e-07	-0.0552193	0.755341	0.668922
GPR35	2859	Gpr35	64095	G protein-coupled receptor 35 [Source:HGNC Symbol;Acc:4492]	Tier 1	2	Y	Y	N	EXC	0.280423	0	0.0132558	0.0362635	3.53435	0.00361365	0.000681779	4.16076	0.000106268	7.56617e-06	2.51333	0.00758038	0.00153347	0	1	1	0	1	1	0	1	1
GRIK5	2901	Grik5	14809	glutamate receptor, ionotropic, kainate 5 [Source:HGNC Symbol;Acc:4583]	Tier 1	0	Y	N	N	EXC	12.2147	4.22089	5.1286	5.27302	1.50536	2.19806e-05	1.32123e-06	1.15095	0.000198607	1.60588e-05	1.07758	0.000442945	4.57377e-05	-0.355863	0.185501	0.0983617	-0.435734	0.0702388	0.0386069	-0.0681377	0.81472	0.740962
GRIN2A	2903	Grin2a	14811	glutamate receptor, ionotropic, N-methyl D-aspartate 2A [Source:HGNC Symbol;Acc:4585]	Tier 1	3	Y	N	N	EXC	39.7659	14.7263	11.3621	5.6741	1.46919	7.47297e-07	1.87361e-08	1.78365	2.56065e-08	1.63957e-10	2.86768	3.60879e-10	3.8443e-13	0.316021	0.0442517	0.0162401	1.39996	1.31231e-07	3.11005e-09	1.08282	1.46538e-06	3.87465e-08
GRM2	2912	Grm2	108068	glutamate receptor, metabotropic 2 [Source:HGNC Symbol;Acc:4594]	Tier 1	1	Y	N	N	EXC	13.2745	0.326167	0.506802	1.02256	4.87234	2.93964e-05	1.87641e-06	4.59609	7.15147e-08	6.33147e-10	3.60184	1.36479e-06	3.45112e-08	-0.270672	0.663861	0.544291	-1.26576	0.0288906	0.0130878	-0.988954	0.0151959	0.00451483
GSTM2	2946	Gstm7	68312	glutathione S-transferase mu 2 (muscle) [Source:HGNC Symbol;Acc:4634]	Tier 1	1	N	N	Y	EXC	10.9021	0.231542	1.10257	0.575039	4.89526	0.000321323	3.5262e-05	3.39446	8.39242e-06	3.09842e-07	4.22932	4.84781e-05	3.12733e-06	-1.49141	0.0314927	0.0106097	-0.66187	0.335301	0.255357	0.842573	0.150519	0.081714
HLA-DRB5	3127	H2-Eb1	14969	major histocompatibility complex, class II, DR beta 5 [Source:HGNC Symbol;Acc:4953]	Tier 1	120	N	Y	N	EXC	13.9931	0.0367362	2.48016	0.0443674	6.32106	0.00163941	0.000261048	2.87118	0.00117382	0.000149998	5.73516	0.00215497	0.000320704	-3.43503	0.0311421	0.0104447	0	1	1	2.86296	0.104462	0.0515162
IL1R1	3554	Il1r1	16177	interleukin 1 receptor, type I [Source:HGNC Symbol;Acc:5993]	Tier 1	3	N	Y	N	EXC	9.15471	0.941105	0.290037	0.399304	3.30495	5.04849e-06	2.08802e-07	4.68161	9.29961e-09	4.08787e-11	4.31125	7.04346e-08	7.5548e-10	1.37714	0.00126659	0.000206132	0.999417	0.008937	0.00306771	-0.372125	0.274602	0.175467
IL6R	3570	Il6ra	16194	interleukin 6 receptor [Source:HGNC Symbol;Acc:6019]	Tier 1	9	N	Y	N	EXC	0.740263	0.316807	0.0423682	0.13874	1.5156	0.0444999	0.0154263	3.78507	2.44285e-05	1.21598e-06	2.27678	0.00175254	0.000249983	0	1	1	0.754394	0.262587	0.190105	-1.50386	0.0242304	0.00821932
INHBA	3624	Inhba	16323	inhibin, beta A [Source:HGNC Symbol;Acc:6066]	Tier 1	0	N	Y	N	EXC	8.07771	0.616726	2.5913	1.21053	3.94864	0.000472081	5.67851e-05	2.21191	0.000174988	1.38023e-05	3.40166	8.75094e-05	6.38469e-06	-1.74121	0.0178598	0.00524426	-0.544536	0.427604	0.344227	1.21288	0.0408929	0.0159176
ITGAV	3685	Itgav	16410	integrin, alpha V [Source:HGNC Symbol;Acc:6150]	Tier 1	0	Y	Y	N	EXC	6.09472	3.19526	3.04672	2.57857	1.10868	0.00376944	0.000720266	1.16752	0.000706071	8.0128e-05	1.38515	0.000165854	1.4053e-05	0.0570817	0.86236	0.792066	0.289746	0.220601	0.154249	0.227658	0.345517	0.236163
ITGB2	3689	Itgb2	16414	integrin, beta 2 (complement component 3 receptor 3 and 4 subunit) [Source:HGNC Symbol;Acc:6155]	Tier 1	0	Y	Y	N	EXC	1.2077	0	0.231848	0.324484	3.97211	0.00188066	0.000309058	1.98353	0.00168414	0.000234811	1.6161	0.0205787	0.00546586	-1.96664	0.00982228	0.00251592	-2.34959	0.00912476	0.00314711	-0.358618	0.447168	0.330648
MMP17	4326	Mmp17	23948	matrix metallopeptidase 17 (membrane-inserted) [Source:HGNC Symbol;Acc:7163]	Tier 1	0	Y	Y	N	EXC	44.5821	4.7065	12.2108	4.11224	3.10382	6.87742e-05	5.33809e-06	1.64642	0.000455875	4.62593e-05	3.20865	1.02967e-05	4.43476e-07	-1.43901	1.03259e-06	3.49035e-08	0.117183	0.726888	0.659064	1.55979	3.25416e-05	1.82365e-06
MINK1	50488	Mink1	50932	misshapen-like kinase 1 [Source:HGNC Symbol;Acc:17565]	Tier 1	1	Y	N	N	EXC	13.407	5.60259	5.07378	2.9739	1.28818	1.50851e-05	8.3812e-07	1.32302	2.97241e-05	1.54767e-06	2.11773	1.87641e-06	5.14717e-08	0.0329314	0.914386	0.866501	0.83683	0.00681152	0.00218066	0.807545	0.0156499	0.00470106
CHST11	50515	Chst11	58250	carbohydrate (chondroitin 4) sulfotransferase 11 [Source:HGNC Symbol;Acc:17422]	Tier 1	0	N	N	Y	EXC	6.77333	4.11491	3.90347	1.17711	1.01898	0.00980601	0.00231491	1.0857	0.00161785	0.000223365	2.88489	2.10579e-06	5.94902e-08	0.0648112	0.77804	0.683851	1.86792	2.98159e-07	8.57295e-09	1.80322	1.20268e-06	3.01618e-08
KCNK10	54207	Kcnk10	72258	potassium channel, subfamily K, member 10 [Source:HGNC Symbol;Acc:6273]	Tier 1	0	Y	N	N	EXC	1.1147	0.165016	0.452808	0.20736	2.71444	6.16116e-05	4.63775e-06	1.31837	0.00011072	7.95169e-06	2.7388	1.66101e-05	8.04423e-07	-1.38079	0.00259487	0.000490503	0.0159044	0.979184	0.971392	1.41581	0.00138069	0.000211775
PPP3CA	5530	Ppp3ca	19055	protein phosphatase 3, catalytic subunit, alpha isozyme [Source:HGNC Symbol;Acc:9314]	Tier 1	0	Y	N	N	EXC	360.641	47.1556	126.934	42.3939	2.90189	9.37769e-11	5.1714e-14	1.50687	3.27822e-08	2.29345e-10	3.06817	3.18578e-10	1.94866e-13	-1.38571	3.8793e-08	5.84807e-10	0.16908	0.376436	0.293703	1.56476	6.02131e-07	1.20807e-08
PRKCB	5579	Prkcb	18751	protein kinase C, beta [Source:HGNC Symbol;Acc:9395]	Tier 1	1	Y	N	N	EXC	86.0768	20.3483	36.2768	27.2934	1.95424	2.77639e-05	1.75213e-06	1.04096	0.0019089	0.000275486	1.51508	8.9525e-05	6.5882e-06	-0.884674	1.80504e-05	1.18428e-06	-0.423048	0.0047877	0.0014044	0.46917	0.0050222	0.00109251
PRKCE	5581	Prkce	18754	protein kinase C, epsilon [Source:HGNC Symbol;Acc:9401]	Tier 1	5	Y	N	N	EXC	99.2058	38.4766	36.0496	29.3337	1.27692	1.11101e-05	5.73149e-07	1.40517	2.3881e-06	6.19498e-08	1.62443	9.17897e-07	2.11327e-08	0.137776	0.293816	0.178979	0.353175	0.00918609	0.00317454	0.215205	0.141037	0.0750732
MAP2K6	5608	Map2k6	26399	mitogen-activated protein kinase kinase 6 [Source:HGNC Symbol;Acc:6846]	Tier 1	0	Y	N	N	EXC	4.37785	2.30317	2.18465	1.01654	1.01384	0.0101884	0.00243069	1.15089	0.000322869	3.01241e-05	2.31061	3.37286e-05	1.95881e-06	0.140608	0.606421	0.479366	1.29477	0.00139568	0.000301403	1.15642	0.00116731	0.000171673
PTGS2	5743	Ptgs2	19225	prostaglandin-endoperoxide synthase 2 (prostaglandin G/H synthase and cyclooxygenase) [Source:HGNC Symbol;Acc:9605]	Tier 1	0	Y	N	N	EXC	5.65429	0.055696	1.34683	0.365856	5.89741	1.78248e-06	5.77491e-08	2.01118	5.61576e-07	9.7351e-09	3.63569	4.99584e-07	9.29356e-09	-3.85584	1.59296e-06	5.89909e-08	-2.2591	0.00398134	0.00111838	1.6227	0.000197538	1.75165e-05
PTK2	5747	Ptk2	14083	protein tyrosine kinase 2 [Source:HGNC Symbol;Acc:9611]	Tier 1	0	Y	N	N	EXC	14.8147	3.08043	4.97037	5.14828	2.41693	3.13875e-07	6.20957e-09	1.62814	2.19687e-07	2.95146e-09	1.60539	1.02807e-06	2.45057e-08	-0.789455	0.000537095	7.28002e-05	-0.80393	0.00118242	0.000245174	-0.0207396	0.897067	0.853405
SLAMF7	57823	Slamf7	75345	SLAM family member 7 [Source:HGNC Symbol;Acc:21394]	Tier 1	0	N	Y	N	EXC	0.954341	0	0.0055194	0.00923214	5.06588	0.00873389	0.00199458	6.68909	0.000256342	2.25204e-05	5.74115	0.00260574	0.000401755	0	1	1	0	1	1	0	1	1
RYR1	6261	Ryr1	20190	ryanodine receptor 1 (skeletal) [Source:HGNC Symbol;Acc:10483]	Tier 1	0	Y	N	N	EXC	0.646607	0.0864587	0.185239	0.0246517	2.90204	0.0343776	0.0110832	2.15745	0.0135087	0.00315972	4.8897	0.00364716	0.000608781	-0.715354	0.500511	0.367157	0	1	1	2.76059	0.0422102	0.0165584
SSTR2	6752	Sstr2	20606	somatostatin receptor 2 [Source:HGNC Symbol;Acc:11331]	Tier 1	0	Y	Y	N	EXC	2.92683	0.148229	0.866468	1.08993	3.75144	0.00138957	0.000212646	1.80488	0.000485749	5.01929e-05	1.78871	0.00869216	0.00182635	-1.87677	0.0177363	0.00519756	-1.94237	0.060606	0.0322526	-0.00565037	0.992308	0.989236
STK10	6793	Stk10	20868	serine/threonine kinase 10 [Source:HGNC Symbol;Acc:11388]	Tier 1	0	Y	N	N	EXC	0.981387	0.369429	0.173764	0.311378	1.66419	0.0186994	0.00516113	2.23972	3.76158e-05	2.08433e-06	1.62224	0.00533758	0.00097408	0.587457	0.329681	0.208599	-0.0383017	0.96087	0.947548	-0.616056	0.199127	0.116241
ABCC8	6833	Abcc8	20927	ATP-binding cassette, sub-family C (CFTR/MRP), member 8 [Source:HGNC Symbol;Acc:59]	Tier 1	4	Y	Y	Y	EXC	2.60478	1.07207	0.477386	0.78447	1.29039	0.00878373	0.00200899	2.64449	1.61031e-06	3.67882e-08	2.12412	8.05675e-05	5.79184e-06	1.36177	0.00010497	1.01621e-05	0.829219	0.0165168	0.00654665	-0.524005	0.0774082	0.0355717
TGFA	7039	Tgfa	21802	transforming growth factor, alpha [Source:HGNC Symbol;Acc:11765]	Tier 1	0	N	Y	N	EXC	4.89515	0.141859	2.45681	0.377333	4.59886	8.41275e-05	6.83134e-06	1.10904	0.0332472	0.00998467	3.70583	8.00242e-06	3.21449e-07	-3.4838	0.00748246	0.0017984	-0.87986	0.203821	0.139788	2.64326	0.00307653	0.000583921
TGFB2	7042	Tgfb2	21808	transforming growth factor, beta 2 [Source:HGNC Symbol;Acc:11768]	Tier 1	7	N	Y	N	EXC	8.57999	1.26514	0.690016	0.567168	3.33424	7.47297e-07	1.87252e-08	3.68479	2.49464e-09	5.71458e-12	4.01463	1.59659e-08	1.05714e-10	0.349051	0.345654	0.222336	0.688016	0.0728072	0.0403518	0.328986	0.28127	0.180921
TGFBR1	7046	Tgfbr1	21812	transforming growth factor, beta receptor 1 [Source:HGNC Symbol;Acc:11772]	Tier 1	1	Y	Y	N	EXC	2.92725	1.03388	1.30429	1.35743	1.46579	0.00290677	0.000524569	1.30818	0.00155963	0.000213011	1.10241	0.00307763	0.00049062	-0.153646	0.728279	0.620305	-0.360441	0.164892	0.108483	-0.227935	0.468093	0.350613
CCR2	729230	Ccr2	12772	chemokine (C-C motif) receptor 2 [Source:HGNC Symbol;Acc:1603]	Tier 1	3	Y	Y	N	EXC	1.69032	0	0.0666791	0.125063	5.69478	0.0012056	0.000179003	4.52667	0.000238821	2.04784e-05	3.55195	0.000794876	9.34322e-05	0	1	1	0	1	1	-0.918898	0.235662	0.144266
DAGLA	747	Dagla	269060	diacylglycerol lipase, alpha [Source:HGNC Symbol;Acc:1165]	Tier 1	1	Y	N	N	EXC	21.8424	8.86997	6.47483	3.73971	1.23751	9.78423e-05	8.18106e-06	1.65841	2.43979e-06	6.35927e-08	2.52603	2.1457e-06	6.16999e-08	0.427378	0.0388693	0.013798	1.28587	0.000873138	0.000165897	0.87461	0.013002	0.00372694
CA12	771	Car12	76459	carbonic anhydrase XII [Source:HGNC Symbol;Acc:1371]	Tier 1	0	Y	N	N	EXC	9.51024	0.124464	1.54593	0.0634743	6.13603	3.22328e-06	1.20426e-07	2.89305	1.92071e-06	4.62801e-08	7.13378	5.17562e-07	9.85543e-09	-3.24201	0.00388444	0.000797154	0	1	1	4.26746	0.00126099	0.000188704
CACNA1C	775	Cacna1c	12288	calcium channel, voltage-dependent, L type, alpha 1C subunit [Source:HGNC Symbol;Acc:1390]	Tier 1	7	Y	N	N	EXC	9.3824	2.41583	4.12717	3.73671	2.1044	1.46064e-06	4.51069e-08	1.29204	4.36199e-05	2.50345e-06	1.42789	1.92564e-05	9.69912e-07	-0.817608	0.000256136	2.94127e-05	-0.678958	0.00070846	0.000126141	0.137908	0.466219	0.348742
CACNA2D1	781	Cacna2d1	12293	calcium channel, voltage-dependent, alpha 2/delta subunit 1 [Source:HGNC Symbol;Acc:1399]	Tier 1	0	Y	N	N	EXC	36.6224	0.933757	9.16578	12.2251	5.78915	1.11323e-09	2.74643e-12	2.00869	1.77586e-08	9.12556e-11	1.49285	7.43325e-07	1.58172e-08	-3.77998	2.45099e-08	3.34145e-10	-4.29363	1.95514e-08	2.68395e-10	-0.512464	0.0174115	0.00539412
CAMK2A	815	Camk2a	12322	calcium/calmodulin-dependent protein kinase II alpha [Source:HGNC Symbol;Acc:1460]	Tier 1	0	Y	N	N	EXC	306.753	41.9514	40.7901	50.0119	2.81648	3.2249e-07	6.42445e-09	2.78212	5.92054e-08	4.80183e-10	2.45457	3.40467e-06	1.13488e-07	-0.00446182	0.987723	0.97976	-0.34396	0.277369	0.202983	-0.334101	0.29787	0.194577
CAMK2B	816	Camk2b	12323	calcium/calmodulin-dependent protein kinase II beta [Source:HGNC Symbol;Acc:1461]	Tier 1	15	Y	N	N	EXC	122.657	26.722	33.9526	25.4969	1.98454	3.01329e-06	1.11542e-07	1.58039	1.16151e-05	4.76964e-07	2.09879	2.64239e-06	8.03149e-08	-0.390883	0.0198146	0.00595855	0.120574	0.551013	0.469049	0.518018	0.0253588	0.00870733
CHST9	83539	Chst9	71367	carbohydrate (N-acetylgalactosamine 4-0) sulfotransferase 9 [Source:HGNC Symbol;Acc:19898]	Tier 1	1	N	Y	Y	EXC	2.70921	0	0.235193	0	4.63752	0.00220739	0.000374467	3.05449	0.000349504	3.32651e-05	6.87538	2.53101e-05	1.36395e-06	-1.53824	0.0909299	0.0395878	0	1	1	3.8064	0.000389588	4.13254e-05
PIP5K1A	8394	Pip5k1a	18720	phosphatidylinositol-4-phosphate 5-kinase, type I, alpha [Source:HGNC Symbol;Acc:8994]	Tier 1	0	Y	N	N	EXC	10.5256	3.09764	3.62248	3.22463	1.78456	0.000211495	2.1081e-05	1.40535	5.25524e-05	3.13323e-06	1.5948	0.000112766	8.713e-06	-0.385666	0.0616763	0.0244651	-0.183654	0.47032	0.38613	0.188747	0.328361	0.220798
CAMKK1	84254	Camkk1	55984	calcium/calmodulin-dependent protein kinase kinase 1, alpha [Source:HGNC Symbol;Acc:1469]	Tier 1	0	Y	N	N	EXC	7.87498	1.27878	2.72002	1.9405	2.72877	6.32383e-06	2.75935e-07	1.66764	1.48717e-06	3.26861e-08	2.07232	3.60633e-06	1.21993e-07	-1.06395	0.00150278	0.000252845	-0.652805	0.0765434	0.0427936	0.408461	0.0854247	0.0402923
LINGO1	84894	Lingo1	235402	leucine rich repeat and Ig domain containing 1 [Source:HGNC Symbol;Acc:21205]	Tier 1	1	N	Y	N	EXC	22.366	1.49368	5.15192	2.50222	3.74747	7.27239e-05	5.72487e-06	1.83766	0.000292261	2.66169e-05	2.74302	3.99751e-05	2.44015e-06	-1.89033	1.37158e-05	8.3823e-07	-0.994362	0.0175958	0.0070925	0.903497	0.00658003	0.00153897
NRP1	8829	Nrp1	18186	neuropilin 1 [Source:HGNC Symbol;Acc:8004]	Tier 1	0	N	Y	N	EXC	12.2586	0.273957	0.985983	3.33016	5.00478	2.65597e-07	4.85167e-09	3.42101	9.29961e-09	3.8432e-11	1.82822	4.21244e-06	1.46896e-07	-1.57953	0.0108015	0.00283328	-3.17779	1.66927e-05	1.26432e-06	-1.59248	0.000109048	8.37119e-06
CACNA1H	8912	Cacna1h	58226	calcium channel, voltage-dependent, T type, alpha 1H subunit [Source:HGNC Symbol;Acc:1395]	Tier 1	0	Y	N	N	EXC	5.83922	0.227899	0.783673	2.34242	4.9945	1.6588e-06	5.29415e-08	3.04267	4.79936e-08	3.71421e-10	1.26522	0.000783581	9.19563e-05	-1.94831	0.000719615	0.000103766	-3.73725	7.00585e-06	4.26322e-07	-1.769	2.38293e-05	1.21589e-06
MYLK3	91807	Mylk3	213435	myosin light chain kinase 3 [Source:HGNC Symbol;Acc:29826]	Tier 1	0	Y	N	N	EXC	0.241165	0	0.00913527	0	2.58068	0.0235288	0.00685899	4.07658	0.000911536	0.00010875	4.59907	0.000203067	1.80043e-05	0	1	1	0	1	1	0	1	1
GLP2R	9340	Glp2r	93896	glucagon-like peptide 2 receptor [Source:HGNC Symbol;Acc:4325]	Tier 1	0	N	Y	N	EXC	0.590504	0.0626442	0.122419	0.203141	3.29639	0.0132652	0.00335951	2.39348	0.00157267	0.000215376	1.5762	0.031201	0.00935755	-0.859847	0.324198	0.203673	-1.7119	0.048931	0.02491	-0.818704	0.113097	0.0568672
CYP7B1	9420	Cyp7b1	13123	cytochrome P450, family 7, subfamily B, polypeptide 1 [Source:HGNC Symbol;Acc:2652]	Tier 1	0	N	N	Y	EXC	8.23516	0.542263	1.20272	0.459917	3.5201	5.29598e-05	3.82221e-06	2.62816	6.40387e-07	1.1696e-08	3.85674	1.80779e-06	4.89055e-08	-0.88481	0.0314335	0.0105755	0.334078	0.455748	0.37149	1.22824	0.000697983	8.73612e-05
CD74	972	Cd74	16149	CD74 molecule, major histocompatibility complex, class II invariant chain [Source:HGNC Symbol;Acc:1697]	Tier 1	0	N	Y	N	EXC	91.0227	0.698693	9.75137	1.54521	6.84069	0.000112201	9.70453e-06	3.80507	6.78042e-06	2.36341e-07	5.48413	6.57661e-05	4.54946e-06	-3.03081	0.0188822	0.00561374	-1.36429	0.436217	0.352501	1.67272	0.133886	0.0703877
NEK6	10783	Nek6	59126	NIMA-related kinase 6 [Source:HGNC Symbol;Acc:7749]	Tier 2	0	Y	N	N	EXC	7.10412	0.94829	1.86473	1.08396	2.65275	1.16556e-05	6.0821e-07	1.878	2.19521e-07	2.92206e-09	2.61281	1.06573e-07	1.25673e-09	-0.778942	0.0461747	0.017154	-0.0388986	0.927415	0.90455	0.738158	0.00310759	0.0005925
HPGD	3248	Hpgd	15446	hydroxyprostaglandin dehydrogenase 15-(NAD) [Source:HGNC Symbol;Acc:5154]	Tier 2	0	Y	N	N	EXC	1.96027	0.300291	0.407816	0.0976494	2.53384	0.00476076	0.000959241	2.09931	0.000396551	3.89382e-05	4.04976	0.000140986	1.15585e-05	-0.375598	0.591843	0.463792	0	1	1	1.93527	0.00929571	0.00240552
JUN	3725	Jun	16476	jun proto-oncogene [Source:HGNC Symbol;Acc:6204]	Tier 2	0	Y	N	N	EXC	24.2483	6.85192	4.17496	1.47919	1.63914	0.000307741	3.34533e-05	2.3379	7.71388e-07	1.45662e-08	3.76848	3.12637e-07	4.96812e-09	0.704158	0.00154208	0.000261174	2.14408	1.12273e-06	4.32467e-08	1.4278	3.22104e-05	1.79711e-06
SMAD3	4088	Smad3	17127	SMAD family member 3 [Source:HGNC Symbol;Acc:6769]	Tier 2	6	Y	N	N	EXC	9.97498	0.929388	1.58154	0.265707	3.34841	5.3664e-08	5.99267e-10	2.56581	2.81065e-08	1.86194e-10	5.08576	8.681e-09	4.0252e-11	-0.785451	0.047672	0.0178196	1.74405	0.00071371	0.000127271	2.53891	4.30404e-05	2.60124e-06
NR4A2	4929	Nr4a2	18227	nuclear receptor subfamily 4, group A, member 2 [Source:HGNC Symbol;Acc:7981]	Tier 2	2	Y	N	N	EXC	11.1704	1.37849	2.6968	0.830261	3.34983	9.26742e-06	4.56759e-07	2.20265	2.49518e-06	6.56545e-08	3.75749	2.81398e-06	8.71272e-08	-1.14885	0.00463117	0.000993702	0.404874	0.478434	0.394589	1.55758	0.00254575	0.000463781
PDK1	5163	Pdk1	228026	pyruvate dehydrogenase kinase, isozyme 1 [Source:HGNC Symbol;Acc:8809]	Tier 2	1	Y	N	N	EXC	4.74266	2.15275	2.46658	1.88835	1.19196	0.000521251	6.40899e-05	1.04823	0.000186407	1.49453e-05	1.40603	8.55567e-05	6.22064e-06	-0.142545	0.53422	0.400744	0.219439	0.365606	0.283356	0.353158	0.110051	0.0549061
PPIC	5480	Ppic	19038	peptidylprolyl isomerase C (cyclophilin C) [Source:HGNC Symbol;Acc:9256]	Tier 2	0	N	Y	N	EXC	0.890439	0	0.279637	0.045852	2.58742	0.0403342	0.0136403	2.51402	0.0261548	0.0073775	3.04666	0.0270898	0.00777263	0	1	1	0	1	1	0.545296	0.714537	0.619009
PRKG1	5592	Prkg1	19091	protein kinase, cGMP-dependent, type I [Source:HGNC Symbol;Acc:9414]	Tier 2	1	Y	N	N	EXC	7.18903	1.31198	3.20659	0.422401	2.87905	1.18337e-06	3.38526e-08	1.06475	6.24995e-05	3.89226e-06	4.06923	1.26133e-08	7.15854e-11	-1.81885	5.50689e-06	2.74677e-07	1.19075	0.00446207	0.00128999	3.00072	1.6887e-08	1.40124e-10
ACKR3	57007	Ackr3	12778	atypical chemokine receptor 3 [Source:HGNC Symbol;Acc:23692]	Tier 2	0	Y	Y	N	EXC	3.36191	0.896272	1.51702	0.753969	2.21185	0.000794522	0.000108496	1.15865	0.000795469	9.24895e-05	1.90919	0.000534977	5.79908e-05	-1.04014	0.0186568	0.005537	-0.30339	0.605185	0.527026	0.746035	0.0473566	0.0191726
RYR2	6262	Ryr2	20191	ryanodine receptor 2 (cardiac) [Source:HGNC Symbol;Acc:10484]	Tier 2	0	Y	N	N	EXC	38.3252	5.40569	8.04996	5.76752	2.85901	8.13524e-10	1.17764e-12	2.24938	3.39301e-09	9.24298e-12	2.77686	1.63557e-09	3.71298e-12	-0.611446	0.000444489	5.77716e-05	-0.0822038	0.631625	0.555616	0.527182	0.00771095	0.00188518
PLA2G2F	64600	Pla2g2f	26971	phospholipase A2, group IIF [Source:HGNC Symbol;Acc:30040]	Tier 2	0	Y	Y	N	EXC	0.533996	0	0	0	3.2549	0.00234985	0.000404951	5.8682	3.33545e-06	9.68503e-08	4.57773	0.000101952	7.69561e-06	0	1	1	0	1	1	0	1	1
BMP1	649	Bmp1	12153	bone morphogenetic protein 1 [Source:HGNC Symbol;Acc:1067]	Tier 2	0	Y	Y	N	EXC	0.919166	0.161489	0.128595	0.414357	3.04426	0.0143646	0.00370824	3.01413	0.000326712	3.05635e-05	1.51804	0.0302251	0.00896575	0.00382218	0.995446	0.99277	-1.5295	0.0147304	0.00567821	-1.50927	0.000565077	6.67637e-05
SNCA	6622	Snca	20617	synuclein, alpha (non A4 component of amyloid precursor) [Source:HGNC Symbol;Acc:11138]	Tier 2	13	Y	Y	N	EXC	126.193	8.64838	40.0452	27.7729	4.08852	1.09361e-07	1.48508e-09	1.58508	4.45827e-06	1.40218e-07	2.12469	2.74607e-07	4.22526e-09	-2.50206	1.49241e-07	3.11539e-09	-1.9494	2.95275e-06	1.47012e-07	0.542001	0.00391973	0.000795582
TDO2	6999	Tdo2	56720	tryptophan 2,3-dioxygenase [Source:HGNC Symbol;Acc:11708]	Tier 2	1	Y	N	N	EXC	5.63032	0	0	0.090962	5.77454	4.66341e-06	1.88696e-07	8.37009	1.97687e-08	1.10153e-10	5.84375	2.02816e-06	5.69132e-08	0	1	1	0	1	1	0	1	1
VIPR1	7433	Vipr1	22354	vasoactive intestinal peptide receptor 1 [Source:HGNC Symbol;Acc:12694]	Tier 2	0	N	Y	N	EXC	1.01405	0.0730375	0.213066	0.453057	3.80766	0.000545985	6.80082e-05	2.5597	8.13175e-05	5.46749e-06	1.21868	0.0244529	0.00681125	-1.18593	0.144202	0.0710851	-2.58624	0.00647094	0.00204415	-1.36008	0.0166856	0.00511552
KMO	8564	Kmo	98256	kynurenine 3-monooxygenase (kynurenine 3-hydroxylase) [Source:HGNC Symbol;Acc:6381]	Tier 2	0	Y	N	N	EXC	0.458917	0	0	0	2.72951	0.0227441	0.00659575	5.33419	6.44116e-05	4.05164e-06	4.17918	0.00118722	0.000151093	0	1	1	0	1	1	0	1	1
SV2B	9899	Sv2b	64176	synaptic vesicle glycoprotein 2B [Source:HGNC Symbol;Acc:16874]	Tier 2	0	Y	N	N	EXC	56.3501	3.40773	11.7616	0.660861	4.23086	1.75482e-05	1.00521e-06	2.02022	0.000219097	1.83666e-05	6.70718	2.11475e-06	6.00016e-08	-2.19236	3.60493e-06	1.59838e-07	2.50842	0.00135164	0.000290046	4.67667	1.15396e-06	2.77253e-08
OCLN	100506658	Ocln	18260	occludin [Source:HGNC Symbol;Acc:8104]	Tier 3B	0	N	Y	N	EXC	1.64578	0.397896	0.0861471	0.755345	3.40703	0.00957439	0.00224263	4.28428	2.53269e-05	1.27011e-06	1.14404	0.0357447	0.0112094	0.950534	0.382629	0.254983	-2.26627	0.0175958	0.00709031	-3.1243	3.75914e-06	1.20114e-07
SPEG	10290	Speg	11790	SPEG complex locus [Source:HGNC Symbol;Acc:16901]	Tier 3B	0	Y	N	N	EXC	2.65228	0.508398	1.09667	0.900841	2.52154	2.70212e-05	1.695e-06	1.4187	0.00015792	1.21725e-05	1.5768	0.000135648	1.10089e-05	-1.10624	0.00441332	0.000934038	-0.953098	0.00734762	0.00239166	0.169901	0.573775	0.459048
CLEC4M	10332	Cd209a	170786	C-type lectin domain family 4, member M [Source:HGNC Symbol;Acc:13523]	Tier 3B	0	N	Y	N	EXC	10.07	0.0918431	0	0	5.62407	0.00496962	0.00101057	8.76485	3.06899e-05	1.59986e-06	7.53988	0.000295341	2.80106e-05	0	1	1	0	1	1	0	1	1
CLEC10A	10462	Mgl2	216864	C-type lectin domain family 10, member A [Source:HGNC Symbol;Acc:16916]	Tier 3B	0	N	Y	N	EXC	2.19281	0	0	0	4.66141	0.000930786	0.000131081	7.10247	2.68929e-06	7.19275e-08	6.72662	9.67192e-06	4.08638e-07	0	1	1	0	1	1	0	1	1
OLFM4	10562	Olfm4	380924	olfactomedin 4 [Source:HGNC Symbol;Acc:17190]	Tier 3B	0	N	Y	N	EXC	0.701865	0.0607153	0.123023	0.0388658	2.61758	0.025917	0.00774097	2.37758	0.0045743	0.000817891	3.74445	0.00307116	0.000489395	0	1	1	0	1	1	0	1	1
KLHL2	11275	Klhl2	77113	kelch-like family member 2 [Source:HGNC Symbol;Acc:6353]	Tier 3B	0	Y	N	N	EXC	56.851	5.9092	20.0316	7.37936	3.24369	2.60353e-09	9.42482e-12	1.53611	5.59107e-07	9.62306e-09	2.89091	7.31834e-09	3.07692e-11	-1.70905	4.71043e-07	1.28744e-08	-0.34646	0.171067	0.113398	1.36004	2.1115e-05	1.05348e-06
TMEM123	114908	Tmem123	71929	transmembrane protein 123 [Source:HGNC Symbol;Acc:30138]	Tier 3B	0	N	Y	N	EXC	2.91119	0.977293	0.966849	1.0003	1.59151	0.0177747	0.00482858	1.58181	0.000439099	4.40947e-05	1.43461	0.00313387	0.000501957	-0.00176451	0.99786	0.996487	-0.168887	0.760104	0.697394	-0.150641	0.672886	0.570093
ADCYAP1	116	Adcyap1	11516	adenylate cyclase activating polypeptide 1 (pituitary) [Source:HGNC Symbol;Acc:241]	Tier 3A	0	N	Y	N	EXC	0.812065	0.0990925	0.3167	0.020583	3.63848	0.00336872	0.000626279	1.26077	0.0189424	0.00488337	5.22298	0.000131114	1.05252e-05	-2.31209	0.00848495	0.00210163	0	1	1	3.96535	0.000349696	3.60545e-05
SERPINA3	12	Serpina3n	20716	serpin peptidase inhibitor, clade A (alpha-1 antiproteinase, antitrypsin), member 3 [Source:HGNC Symbol;Acc:16]	Tier 3A	0	N	Y	N	EXC	7.62842	1.26606	2.46318	1.33179	2.42342	0.00302906	0.00055144	1.51222	0.000972338	0.000118352	2.4999	0.000372873	3.70804e-05	-0.915822	0.00806551	0.00197395	0.0759382	0.862273	0.821168	0.996436	0.00278435	0.000515868
ACVR1C	130399	Acvr1c	269275	activin A receptor, type IC [Source:HGNC Symbol;Acc:18123]	Tier 3B	0	Y	N	N	EXC	4.69235	0.0799837	1.05236	1.54039	6.23331	8.66223e-07	2.25109e-08	2.29692	1.39038e-06	3.03005e-08	1.77032	2.40242e-06	7.0294e-08	-3.90073	0.000170654	1.81873e-05	-4.46349	1.63264e-06	7.03592e-08	-0.509486	0.101464	0.0496107
MUC15	143662	Muc15	269328	mucin 15, cell surface associated [Source:HGNC Symbol;Acc:14956]	Tier 3A	0	N	Y	N	EXC	2.69994	0.17939	0.759336	0.123639	4.26562	0.00609486	0.00129023	2.2507	0.000876292	0.00010346	4.91645	0.000958501	0.000117365	-1.99149	0.00228301	0.000418984	0.638928	0.417226	0.333906	2.64422	0.000998632	0.00014093
NCAN	1463	Ncan	13004	neurocan [Source:HGNC Symbol;Acc:2465]	Tier 3A	16	N	Y	N	EXC	39.9437	11.8747	12.7905	12.0472	1.6848	2.30526e-05	1.39679e-06	1.56461	1.00732e-05	3.94148e-07	1.62596	2.85572e-05	1.59163e-06	-0.110194	0.471929	0.337822	-0.052416	0.786753	0.729044	0.0608392	0.762159	0.677916
CLEC14A	161198	Clec14a	66864	C-type lectin domain family 14, member A [Source:HGNC Symbol;Acc:19832]	Tier 3A	0	N	Y	N	EXC	0.469423	0	0.22784	0.016314	3.41479	0.00294609	0.000533696	1.14369	0.0417899	0.0134436	3.60419	0.00283686	0.000446514	-2.25669	0.00226895	0.000415809	0	1	1	2.47391	0.00794719	0.00196502
DCN	1634	Dcn	13179	decorin [Source:HGNC Symbol;Acc:2705]	Tier 3B	0	N	Y	N	EXC	9.15679	0.370188	1.4385	0.328692	4.90065	0.000434909	5.11147e-05	2.70529	0.000127045	9.38362e-06	5.26393	8.90911e-05	6.53941e-06	-2.17742	0.0209889	0.00639146	0	1	1	2.56958	0.0127741	0.00364578
C1QL2	165257	C1ql2	226359	complement component 1, q subcomponent-like 2 [Source:HGNC Symbol;Acc:24181]	Tier 3B	0	N	Y	N	EXC	19.115	0	0.00967991	0	7.78682	8.55913e-07	2.2184e-08	9.4999	2.18809e-08	1.33582e-10	9.35386	6.0813e-08	6.1741e-10	0	1	1	0	1	1	0	1	1
DIO3	1735	Dio3	107585	deiodinase, iodothyronine, type III [Source:HGNC Symbol;Acc:2885]	Tier 3B	0	Y	N	N	EXC	0.611224	0	0.280047	0	3.33537	0.0280176	0.00855379	2.07502	0.0300073	0.00878557	5.01105	0.00140389	0.000188389	-1.23528	0.188757	0.100583	0	1	1	2.95096	0.00521363	0.00114569
JAG1	182	Jag1	16449	jagged 1 [Source:HGNC Symbol;Acc:6188]	Tier 3A	1	N	Y	N	EXC	1.2456	0.163829	0.30736	0.15629	2.92697	0.0301974	0.00944617	2.1631	0.00278786	0.000439962	3.27018	0.00567194	0.00105048	-0.73939	0.244469	0.141134	0.342625	0.712813	0.643975	1.10717	0.0624991	0.0271336
ECM2	1842	Ecm2	407800	extracellular matrix protein 2, female organ and adipocyte specific [Source:HGNC Symbol;Acc:3154]	Tier 3B	1	N	Y	N	EXC	2.21809	0.287286	0.0513559	0.198503	2.93715	0.0264281	0.00793554	5.02025	0.000208505	1.72076e-05	3.057	0.00399857	0.000680549	2.10037	0.0265641	0.00854712	0.122368	0.888632	0.855617	-1.9184	0.0128941	0.00368483
HTRA4	203100	Htra4	330723	HtrA serine peptidase 4 [Source:HGNC Symbol;Acc:26909]	Tier 3B	0	N	Y	N	EXC	1.76325	0.0562244	0.0479759	0.171359	3.61634	0.000937445	0.000132407	5.34925	8.01382e-06	2.90248e-07	3.3851	0.000215841	1.92866e-05	0	1	1	0	1	1	0	1	1
FBLN1	2192	Fbln1	14114	fibulin 1 [Source:HGNC Symbol;Acc:3600]	Tier 3A	1	N	Y	N	EXC	0.647467	0.0952061	0.153392	0.0568816	2.57925	0.00592619	0.0012488	2.14893	0.000466959	4.77598e-05	3.33402	0.000116241	9.08938e-06	-0.417473	0.622684	0.497064	0	1	1	1.17556	0.0720865	0.0324878
LRRC55	219527	Lrrc55	241528	leucine rich repeat containing 55 [Source:HGNC Symbol;Acc:32324]	Tier 3B	0	Y	Y	N	EXC	5.84287	2.20075	2.56075	0.295687	1.20845	0.00646679	0.00138813	1.0144	0.00166567	0.000231103	4.16165	6.46318e-07	1.33274e-08	-0.193115	0.521371	0.387387	2.9495	1.54327e-06	6.52429e-08	3.16004	1.26634e-07	1.64673e-09
GPC4	2239	Gpc4	14735	glypican 4 [Source:HGNC Symbol;Acc:4452]	Tier 3B	0	N	Y	N	EXC	36.8215	3.04775	2.5617	0.693686	3.68221	3.2917e-08	2.85136e-10	3.88825	1.40537e-10	6.96073e-14	5.80809	1.36139e-09	2.59277e-12	0.206766	0.486545	0.352735	2.12723	1.60217e-05	1.19818e-06	1.92161	9.47569e-06	3.83745e-07
FGF5	2250	Fgf5	14176	fibroblast growth factor 5 [Source:HGNC Symbol;Acc:3683]	Tier 3A	5	N	Y	N	EXC	2.69191	1.4117	0.374179	0.421682	1.2294	0.0310844	0.00981365	3.06679	6.09567e-05	3.7513e-06	2.74317	0.000265167	2.46138e-05	1.8354	0.0015131	0.000254878	1.50312	0.00191408	0.000447904	-0.326118	0.611021	0.49929
FIGF	2277	Vegfd	14205	c-fos induced growth factor (vascular endothelial growth factor D) [Source:HGNC Symbol;Acc:3708]	Tier 3B	0	N	Y	N	EXC	0.85211	0	0.218988	0.0809584	3.97284	0.00125013	0.000187429	2.4338	0.00756496	0.00153393	3.64758	0.00195667	0.000284283	-1.53841	0.108942	0.0497546	0	1	1	1.27726	0.23026	0.140062
ITGA11	22801	Itga11	319480	integrin, alpha 11 [Source:HGNC Symbol;Acc:6136]	Tier 3A	0	N	Y	N	EXC	1.85781	0.128397	0.330211	0.104204	3.2029	0.00466179	0.000935442	2.26255	0.000400095	3.93852e-05	4.19632	0.000367743	3.64543e-05	-0.925339	0.078237	0.0329009	0	1	1	1.93134	0.00263051	0.000481991
VASH1	22846	Vash1	238328	vasohibin 1 [Source:HGNC Symbol;Acc:19964]	Tier 3B	0	N	Y	N	EXC	2.14975	0.607428	0.434504	0.725521	1.82363	0.000910353	0.000127513	2.3021	2.80536e-06	7.6595e-08	1.46606	0.000631275	7.04204e-05	0.482713	0.103959	0.0468725	-0.36174	0.250654	0.179508	-0.837516	0.00282905	0.000525727
NTNG1	22854	Ntng1	80883	netrin G1 [Source:HGNC Symbol;Acc:23319]	Tier 3A	0	N	Y	N	EXC	11.4706	4.05459	3.14487	0.474643	1.50467	2.68469e-06	9.66024e-08	1.88539	1.88134e-08	9.90055e-11	4.67385	9.67931e-10	1.70905e-12	0.380982	0.0247839	0.00786223	3.16761	2.13062e-09	1.49879e-11	2.78868	5.25421e-09	2.79808e-11
MAST3	23031	Mast3	546071	microtubule associated serine/threonine kinase 3 [Source:HGNC Symbol;Acc:19036]	Tier 3A	1	Y	N	N	EXC	42.9913	1.86973	7.69943	2.81573	4.3255	1.97469e-08	1.4701e-10	2.21617	1.69327e-07	1.96189e-09	3.91629	1.58907e-08	1.03213e-10	-2.1017	1.2977e-07	2.63674e-09	-0.396089	0.260442	0.188243	1.70351	2.4992e-05	1.30152e-06
KCNH3	23416	Kcnh3	16512	potassium voltage-gated channel, subfamily H (eag-related), member 3 [Source:HGNC Symbol;Acc:6252]	Tier 3B	0	Y	N	N	EXC	3.01217	0.349154	0.801598	1.1444	3.27139	0.000183461	1.77176e-05	2.03142	3.65414e-05	1.99254e-06	1.5652	0.00104277	0.000129673	-1.22692	0.0695212	0.0283471	-1.70659	0.0145785	0.00559561	-0.452465	0.284323	0.183422
VSIG2	23584	Vsig2	57276	V-set and immunoglobulin domain containing 2 [Source:HGNC Symbol;Acc:17149]	Tier 3A	1	N	Y	N	EXC	32.855	1.06219	4.95811	0.353664	4.88931	2.99146e-06	1.10321e-07	2.74297	5.78063e-07	1.00567e-08	6.20372	5.77666e-07	1.14746e-08	-2.12497	0.000660682	9.33191e-05	1.33733	0.0618517	0.0330802	3.49122	5.15794e-05	3.21816e-06
FRZB	2487	Frzb	20378	frizzled-related protein [Source:HGNC Symbol;Acc:3959]	Tier 3A	0	N	Y	N	EXC	6.26252	1.01005	0.293019	0.185078	2.72052	0.000129924	1.16338e-05	4.4064	5.22284e-07	8.82762e-09	4.98386	2.11475e-06	6.01018e-08	1.69558	0.00407059	0.000846827	2.26267	0.000530242	8.79271e-05	0.580599	0.393743	0.280273
BAMBI	25805	Bambi	68010	BMP and activin membrane-bound inhibitor [Source:HGNC Symbol;Acc:30251]	Tier 3B	0	N	Y	N	EXC	0.861779	0.16175	0.121848	0.187923	2.65925	0.014389	0.00371663	2.85342	0.000242896	2.09682e-05	2.08428	0.0060601	0.00114606	0.240662	0.766855	0.669346	-0.577528	0.419675	0.336267	-0.786107	0.103064	0.0505649
OLFML2B	25903	Olfml2b	320078	olfactomedin-like 2B [Source:HGNC Symbol;Acc:24558]	Tier 3A	2	N	Y	N	EXC	4.06202	0	0.183383	0.105927	5.68597	0.00112514	0.000164656	4.71712	1.06335e-05	4.21339e-07	4.87395	0.000111506	8.59003e-06	-0.972239	0.300721	0.184653	0	1	1	0.152975	0.848648	0.785692
KLHL3	26249	Klhl3	100503085	kelch-like family member 3 [Source:HGNC Symbol;Acc:6354]	Tier 3B	0	Y	N	N	EXC	8.45209	1.34969	1.74506	1.75579	2.65764	6.09602e-05	4.57611e-06	2.13864	3.56149e-05	1.91613e-06	2.08246	3.71642e-05	2.21494e-06	-0.531705	0.207219	0.113695	-0.588412	0.0471029	0.0237606	-0.0402304	0.916949	0.879641
KCNG2	26251	Kcng2	240444	potassium voltage-gated channel, subfamily G, member 2 [Source:HGNC Symbol;Acc:6249]	Tier 3B	1	Y	N	N	EXC	3.53199	0.173232	0.160777	0.363768	3.80439	0.000142566	1.30409e-05	4.30562	7.88391e-07	1.51313e-08	3.36354	8.49489e-05	6.16596e-06	0.526993	0.400307	0.270982	-0.447047	0.564655	0.483092	-0.952409	0.135215	0.0713007
KCNV1	27012	Kcnv1	67498	potassium channel, subfamily V, member 1 [Source:HGNC Symbol;Acc:18861]	Tier 3B	0	Y	N	N	EXC	7.61654	0.617666	3.6742	1.63282	4.04433	1.36988e-06	4.15487e-08	1.03156	0.000696769	7.85547e-05	2.36903	2.72971e-07	4.18286e-09	-3.01062	9.49776e-06	5.39101e-07	-1.686	0.00059853	0.000102394	1.33388	8.81603e-05	6.2999e-06
DKK3	27122	Dkk3	50781	dickkopf WNT signaling pathway inhibitor 3 [Source:HGNC Symbol;Acc:2893]	Tier 3A	0	N	Y	N	EXC	53.8833	4.8156	6.07056	10.2987	3.72685	2.90469e-05	1.8521e-06	2.75606	9.9338e-06	3.85617e-07	2.18507	4.63929e-05	2.94892e-06	-0.957319	0.0448973	0.016547	-1.49935	0.000470157	7.59085e-05	-0.582085	0.048387	0.0197156
GP1BB	2812	Gp1bb	14724	glycoprotein Ib (platelet), beta polypeptide [Source:HGNC Symbol;Acc:4440]	Tier 3B	0	N	Y	N	EXC	15.9084	7.56315	6.57002	3.41702	1.10303	0.000282301	3.00846e-05	1.30914	3.65414e-05	1.98349e-06	2.23718	4.8496e-06	1.72479e-07	0.203588	0.474968	0.341104	1.12869	0.00299065	0.000786368	0.936625	0.011172	0.00304395
LPAR4	2846	Lpar4	78134	lysophosphatidic acid receptor 4 [Source:HGNC Symbol;Acc:4478]	Tier 3B	0	Y	Y	N	EXC	0.643912	0.0287479	0.0349543	0.0175046	3.2802	0.00320299	0.000589287	4.31992	5.02875e-05	2.96953e-06	4.44859	0.000216778	1.93976e-05	0	1	1	0	1	1	0	1	1
GPR37	2861	Gpr37	14763	G protein-coupled receptor 37 (endothelin receptor type B-like) [Source:HGNC Symbol;Acc:4494]	Tier 3B	1	Y	N	N	EXC	3.25429	0.142443	0.443111	0.599025	4.03566	0.00948119	0.00220968	2.71882	0.000635615	6.97659e-05	2.32659	0.00682759	0.00133598	-1.28093	0.0197792	0.00594141	-1.70491	0.00856118	0.00289544	-0.391984	0.229817	0.139721
GRP	2922	Grp	225642	gastrin-releasing peptide [Source:HGNC Symbol;Acc:4605]	Tier 3B	0	N	Y	N	EXC	4.22806	0	0.429318	0	4.37237	0.00333058	0.000617583	3.09445	0.00020658	1.7024e-05	6.53516	4.19405e-05	2.5945e-06	-1.23528	0.127906	0.0611907	0	1	1	3.4467	0.000100157	7.43005e-06
GYPC	2995	Gypc	71683	glycophorin C (Gerbich blood group) [Source:HGNC Symbol;Acc:4704]	Tier 3B	0	N	Y	N	EXC	0.57334	0.0269625	0	0.0434455	2.2568	0.0309477	0.00976623	4.82605	0.000191053	1.53652e-05	3.49189	0.00269969	0.000419429	0	1	1	0	1	1	0	1	1
IL16	3603	Il16	16170	interleukin 16 [Source:HGNC Symbol;Acc:5980]	Tier 3A	0	N	Y	N	EXC	1.76365	0.102124	0.0824049	0.0689673	4.00295	3.33829e-05	2.1884e-06	4.46616	7.9541e-08	7.38679e-10	4.31858	2.4821e-06	7.40342e-08	0.446954	0.472474	0.338446	0	1	1	-0.153226	0.797297	0.719389
ITGB8	3696	Itgb8	320910	integrin, beta 8 [Source:HGNC Symbol;Acc:6163]	Tier 3B	0	Y	Y	N	EXC	5.94339	0.778046	2.22547	2.09816	3.37186	8.98877e-07	2.34835e-08	1.38998	2.09547e-05	1.00155e-06	1.47158	0.000140986	1.15755e-05	-1.98469	5.76337e-05	4.907e-06	-1.9021	0.000619045	0.000106712	0.0864436	0.793769	0.715469
KCNG1	3755	Kcng1	241794	potassium voltage-gated channel, subfamily G, member 1 [Source:HGNC Symbol;Acc:6248]	Tier 3B	0	Y	N	N	EXC	4.63029	0.103462	0.540105	0.0200875	5.28735	4.40294e-06	1.73176e-07	3.20648	1.84107e-07	2.23409e-09	7.74368	4.9915e-07	9.22253e-09	-2.04839	0.00684966	0.00161623	0	1	1	4.54959	0.000199267	1.77084e-05
KCNJ6	3763	Kcnj6	16522	potassium inwardly-rectifying channel, subfamily J, member 6 [Source:HGNC Symbol;Acc:6267]	Tier 3A	1	Y	Y	N	EXC	15.569	3.49093	2.13096	3.55545	1.98599	2.76395e-07	5.16323e-09	2.72894	1.34517e-09	2.22057e-12	2.13803	3.23322e-08	2.6709e-10	0.745354	0.00136608	0.000225277	0.143043	0.485855	0.402037	-0.596435	0.00432767	0.000902838
LCT	3938	Lct	226413	lactase [Source:HGNC Symbol;Acc:6530]	Tier 3A	3	N	Y	N	EXC	12.0794	0	0.0315355	0	8.26403	0.000187628	1.81718e-05	8.60818	3.39927e-06	9.91243e-08	9.89196	1.13766e-05	5.04334e-07	0	1	1	0	1	1	0	1	1
LUM	4060	Lum	17022	lumican [Source:HGNC Symbol;Acc:6724]	Tier 3A	0	N	Y	N	EXC	1.21989	0	0.172517	0.0605036	4.18915	5.58827e-05	4.09278e-06	2.94376	4.77608e-05	2.77954e-06	4.00814	0.000413999	4.22405e-05	-1.24907	0.0774485	0.0324678	0	1	1	1.07341	0.25684	0.161096
FAM19A1	407738	Fam19a1	320265	family with sequence similarity 19 (chemokine (C-C motif)-like), member A1 [Source:HGNC Symbol;Acc:21587]	Tier 3B	0	N	Y	N	EXC	11.6012	0.217273	1.9158	0.188611	5.58116	2.01779e-07	3.41902e-09	2.44476	2.01721e-07	2.57642e-09	6.23658	3.42302e-07	5.60169e-09	-3.11918	0.000259814	2.99202e-05	0	1	1	3.78828	0.000230538	2.1285e-05
MAS1	4142	Mas1	17171	MAS1 oncogene [Source:HGNC Symbol;Acc:6899]	Tier 3B	0	Y	N	N	EXC	7.2662	0.138502	0.513619	0.263463	5.57649	4.15206e-06	1.61221e-07	4.08711	1.91763e-08	1.05189e-10	5.16306	8.32191e-07	1.84721e-08	-1.45916	0.0356665	0.0123782	0	1	1	1.07602	0.0834618	0.039077
NELL2	4753	Nell2	54003	NEL-like 2 (chicken) [Source:HGNC Symbol;Acc:7751]	Tier 3B	0	N	Y	N	EXC	76.9476	9.15371	9.57307	11.3527	2.83437	8.42631e-06	4.0601e-07	2.63749	2.00357e-06	4.87009e-08	2.53762	5.34588e-06	1.94175e-07	-0.178016	0.439201	0.305947	-0.285049	0.134569	0.0849121	-0.0961918	0.697063	0.597541
NOTCH2	4853	Notch2	18129	notch 2 [Source:HGNC Symbol;Acc:7882]	Tier 3A	2	N	Y	N	EXC	1.46179	0.312505	0.221299	0.33781	2.42869	0.00717329	0.00157242	2.81793	7.12225e-05	4.6344e-06	2.18502	0.00129326	0.000169956	0.402398	0.377541	0.250498	-0.251152	0.576604	0.495441	-0.643942	0.0585172	0.0249665
NPTX2	4885	Nptx2	53324	neuronal pentraxin II [Source:HGNC Symbol;Acc:7953]	Tier 3B	0	N	Y	N	EXC	2.38678	0.214034	1.14359	1.15133	3.71238	0.0058722	0.001235	1.33471	0.0169359	0.00421721	1.39231	0.0361671	0.011392	-2.34449	0.00278338	0.000533327	-2.31497	0.00704014	0.00227177	0.064947	0.892006	0.845498
NTF3	4908	Ntf3	18205	neurotrophin 3 [Source:HGNC Symbol;Acc:8023]	Tier 3B	0	N	Y	N	EXC	1.96308	0.251197	0.165777	0	2.90404	0.00492178	0.000997452	3.57028	3.98072e-05	2.24273e-06	6.09063	7.20151e-06	2.81557e-07	0.67205	0.41456	0.283673	0	1	1	2.51212	0.00420583	0.000867262
ROR1	4919	Ror1	26563	receptor tyrosine kinase-like orphan receptor 1 [Source:HGNC Symbol;Acc:10256]	Tier 3B	0	Y	N	N	EXC	0.540157	0	0.0448921	0.0115201	4.85593	4.065e-05	2.78599e-06	3.53208	2.49193e-05	1.24504e-06	5.3328	1.80125e-05	8.87107e-07	-1.29868	0.139784	0.0684126	0	1	1	1.78056	0.0807651	0.0374943
OGN	4969	Ogn	18295	osteoglycin [Source:HGNC Symbol;Acc:8126]	Tier 3B	0	N	Y	N	EXC	1.7944	0	0.33796	0.29512	4.59424	0.00120832	0.000179578	3.07432	0.000236146	2.01174e-05	2.61876	0.00314238	0.000504112	-1.48276	0.141063	0.0692881	0	1	1	-0.439037	0.605037	0.493201
HEBP1	50865	Hebp1	15199	heme binding protein 1 [Source:HGNC Symbol;Acc:17176]	Tier 3B	0	N	Y	N	EXC	7.54271	0.334555	0.884657	0.586622	4.07202	0.000575955	7.23765e-05	3.28073	3.71727e-05	2.04367e-06	3.54028	8.63622e-05	6.28976e-06	-0.791832	0.303972	0.18748	0	1	1	0.265492	0.683676	0.581943
PCSK5	5125	Pcsk5	18552	proprotein convertase subtilisin/kexin type 5 [Source:HGNC Symbol;Acc:8747]	Tier 3A	2	N	Y	N	EXC	2.28684	0.164223	0.596158	0.746474	4.05074	3.27035e-05	2.13485e-06	1.72421	9.55779e-06	3.66879e-07	1.49499	0.000138224	1.12703e-05	-2.28776	0.00118829	0.000191107	-2.56515	0.00088087	0.000167901	-0.242997	0.40535	0.290974
PDGFB	5155	Pdgfb	18591	platelet-derived growth factor beta polypeptide [Source:HGNC Symbol;Acc:8800]	Tier 3A	0	N	Y	N	EXC	0.673213	0	0.234525	0.0700672	3.59857	0.0050886	0.00104108	1.31971	0.0394642	0.0125268	3.57679	0.00455881	0.000804936	-2.28317	0.00589391	0.00134204	0	1	1	2.27853	0.0229765	0.00767711
SERPINB8	5271	Serpinb8	20725	serpin peptidase inhibitor, clade B (ovalbumin), member 8 [Source:HGNC Symbol;Acc:8952]	Tier 3B	0	N	Y	N	EXC	2.61359	0.0363443	0.135462	0.0821721	4.54133	0.000750331	0.000100134	4.03356	1.73194e-05	7.94555e-07	4.63911	0.000135431	1.09742e-05	-0.479105	0.612676	0.485914	0	1	1	0.60345	0.491041	0.374035
IL20RB	53833	Il20rb	213208	interleukin 20 receptor beta [Source:HGNC Symbol;Acc:6004]	Tier 3B	3	N	Y	N	EXC	1.0924	0.0247428	0.0329835	0.0519023	3.45671	0.00407373	0.000791607	5.12346	4.93686e-05	2.90328e-06	4.05128	0.00091657	0.000111493	0	1	1	0	1	1	0	1	1
TNFRSF19	55504	Tnfrsf19	29820	tumor necrosis factor receptor superfamily, member 19 [Source:HGNC Symbol;Acc:11915]	Tier 3A	2	N	Y	N	EXC	4.12695	1.037	1.29369	0.87427	1.84836	0.0117569	0.00291349	1.76316	0.000586248	6.29004e-05	2.21874	0.000687738	7.82454e-05	-0.0917011	0.809853	0.723066	0.374732	0.277754	0.203355	0.470656	0.05857	0.025006
MAPK4	5596	Mapk4	225724	mitogen-activated protein kinase 4 [Source:HGNC Symbol;Acc:6878]	Tier 3B	0	Y	N	N	EXC	4.32372	1.51546	1.90305	1.33671	1.4744	0.00017942	1.71789e-05	1.26625	0.000220131	1.85508e-05	1.85219	6.93671e-06	2.68567e-07	-0.215328	0.552421	0.421393	0.381409	0.17102	0.113355	0.60396	0.0497217	0.0203856
PDGFC	56034	Pdgfc	54635	platelet derived growth factor C [Source:HGNC Symbol;Acc:8801]	Tier 3A	1	N	Y	N	EXC	1.25986	0.194379	0.4819	0.320087	2.50163	0.00784274	0.00175268	1.30279	0.00531288	0.000984159	1.85969	0.00274189	0.000428626	-1.22579	0.0363733	0.0126855	-0.640437	0.271316	0.197724	0.56073	0.100222	0.048904
ISLR2	57611	Islr2	320563	immunoglobulin superfamily containing leucine-rich repeat 2 [Source:HGNC Symbol;Acc:29286]	Tier 3B	0	Y	N	N	EXC	9.12147	0.144972	0.926747	0.337202	6.20746	0.000150264	1.39523e-05	3.24212	5.36232e-06	1.78279e-07	4.53243	3.30826e-06	1.08273e-07	-2.9187	0.00620179	0.00142921	-1.66087	0.018619	0.00760783	1.31783	0.0226084	0.00753054
STIM2	57620	Stim2	116873	stromal interaction molecule 2 [Source:HGNC Symbol;Acc:19205]	Tier 3A	0	N	Y	N	EXC	22.9781	2.59053	6.2297	5.88008	3.06977	4.16401e-07	9.15641e-09	1.83593	4.29636e-07	6.80948e-09	1.99467	9.47742e-07	2.2053e-08	-1.23052	3.16341e-05	2.40154e-06	-1.06559	0.000641532	0.000111289	0.158315	0.361712	0.250728
LRRN1	57633	Lrrn1	16979	leucine rich repeat neuronal 1 [Source:HGNC Symbol;Acc:20980]	Tier 3B	0	N	Y	N	EXC	39.8382	13.2608	8.29301	8.99889	1.45205	5.64113e-05	4.15298e-06	2.10894	2.00131e-07	2.50287e-09	2.02116	9.55119e-07	2.22849e-08	0.665498	0.000301589	3.59171e-05	0.569952	0.00261291	0.000663488	-0.0852621	0.615326	0.504065
PTPRJ	5795	Ptprj	19271	protein tyrosine phosphatase, receptor type, J [Source:HGNC Symbol;Acc:9673]	Tier 3A	7	N	Y	N	EXC	18.7762	3.68242	5.38795	4.18547	2.28427	7.93445e-06	3.745e-07	1.7081	1.1027e-05	4.45122e-07	2.05591	3.29755e-06	1.07714e-07	-0.562794	0.00897674	0.00225051	-0.225748	0.23184	0.163564	0.343932	0.0600037	0.0257642
CACNG6	59285	Cacng6	54378	calcium channel, voltage-dependent, gamma subunit 6 [Source:HGNC Symbol;Acc:13625]	Tier 3B	0	Y	N	N	EXC	0.316616	0	0.0638392	0.0743486	2.3088	0.0161034	0.00427367	2.76013	0.00390413	0.000670992	2.4063	0.0128008	0.00297861	0	1	1	0	1	1	0	1	1
BDNF	627	Bdnf	12064	brain-derived neurotrophic factor [Source:HGNC Symbol;Acc:1033]	Tier 3A	15	N	Y	N	EXC	6.23462	0.0476964	0.475641	0.0283818	6.61268	1.28313e-05	6.899e-07	3.5322	2.00813e-07	2.53627e-09	7.52083	1.68311e-06	4.46835e-08	-3.02973	0.00159767	0.000272579	0	1	1	3.99299	0.000536905	6.22748e-05
CCL17	6361	Ccl17	20295	chemokine (C-C motif) ligand 17 [Source:HGNC Symbol;Acc:10615]	Tier 3B	0	N	Y	N	EXC	1.56744	0.0307641	0.177222	0.28916	3.6816	0.000326221	3.59119e-05	3.10795	2.0815e-05	9.91006e-07	2.37552	0.0018472	0.000265816	0	1	1	0	1	1	-0.739786	0.245832	0.152395
CXCL12	6387	Cxcl12	20315	chemokine (C-X-C motif) ligand 12 [Source:HGNC Symbol;Acc:10672]	Tier 3A	1	N	Y	N	EXC	2.34849	0.113301	0.215666	0.346381	4.08692	0.000103511	8.79776e-06	3.58487	7.66524e-07	1.44269e-08	3.02479	2.1255e-05	1.09103e-06	-0.489092	0.372882	0.246453	-1.0601	0.0802631	0.0453611	-0.553313	0.168922	0.0946985
SMOC2	64094	Smoc2	64074	SPARC related modular calcium binding 2 [Source:HGNC Symbol;Acc:20323]	Tier 3A	0	N	Y	N	EXC	4.15256	0	0.127538	0.0128718	5.66716	7.97475e-05	6.38771e-06	5.21069	5.69316e-06	1.91041e-07	6.78204	9.4174e-06	3.94322e-07	0	1	1	0	1	1	0	1	1
RTN4R	65078	Rtn4r	65079	reticulon 4 receptor [Source:HGNC Symbol;Acc:18601]	Tier 3A	0	Y	Y	N	EXC	13.2143	0.456294	0.906707	1.23107	5.27422	4.30158e-05	3.00076e-06	4.05084	8.97928e-08	8.56123e-10	3.36426	1.3641e-06	3.43217e-08	-1.20722	0.112085	0.0516089	-1.90782	0.0108985	0.0039107	-0.683795	0.0735325	0.0333034
BMP3	651	Bmp3	110075	bone morphogenetic protein 3 [Source:HGNC Symbol;Acc:1070]	Tier 3A	0	N	Y	N	EXC	7.38326	0.190145	1.98898	1.3769	6.11108	2.57059e-05	1.59209e-06	1.78082	5.06735e-06	1.65021e-07	2.59615	2.71125e-06	8.30916e-08	-4.26913	2.37726e-05	1.66254e-06	-3.51224	0.00102488	0.000203617	0.819215	0.00748883	0.00180975
SLIT1	6585	Slit1	20562	slit homolog 1 (Drosophila) [Source:HGNC Symbol;Acc:11085]	Tier 3A	0	Y	Y	N	EXC	14.6973	1.33753	2.16889	1.95053	3.60322	8.16254e-08	1.04655e-09	2.86172	2.19762e-09	4.76206e-12	2.98974	8.26614e-08	9.33056e-10	-0.746229	0.00773025	0.00187164	-0.620279	0.0980033	0.0578816	0.13212	0.640668	0.533513
SLIT3	6586	Slit3	20564	slit homolog 3 (Drosophila) [Source:HGNC Symbol;Acc:11087]	Tier 3A	3	N	Y	N	EXC	17.9413	2.26787	2.70209	0.425282	2.91945	1.83244e-08	1.3263e-10	2.64078	9.29961e-09	4.06335e-11	5.478	1.36139e-09	2.74715e-12	-0.286259	0.360653	0.235842	2.56052	2.21105e-06	1.01674e-07	2.8539	4.06375e-06	1.32111e-07
STC1	6781	Stc1	20855	stanniocalcin 1 [Source:HGNC Symbol;Acc:11373]	Tier 3A	2	N	Y	N	EXC	2.08825	0.0689553	0.836245	0.162852	4.25083	0.000297892	3.21979e-05	1.6531	0.000669084	7.43151e-05	4.24692	6.97166e-05	4.86671e-06	-2.57092	0.00228841	0.000420275	0	1	1	2.60038	0.00219774	0.000385003
TGFBR3	7049	Tgfbr3	21814	transforming growth factor, beta receptor III [Source:HGNC Symbol;Acc:11774]	Tier 3A	0	N	Y	N	EXC	2.84287	1.05363	1.02532	0.612798	1.86544	0.000584541	7.36972e-05	1.5845	1.65654e-05	7.53813e-07	2.45205	5.80293e-06	2.14435e-07	-0.282544	0.469115	0.335148	0.582216	0.16432	0.10805	0.873696	0.00579528	0.00131021
EXC	7070	EXC	21838	Thy-1 cell surface antigen [Source:HGNC Symbol;Acc:11801]	Tier 3B	0	N	Y	N	EXC	#N/A	#N/A	#N/A	#N/A	#N/A	#N/A	#N/A	#N/A	#N/A	#N/A	#N/A	#N/A	#N/A	#N/A	#N/A	#N/A	#N/A	#N/A	#N/A	#N/A	#N/A	#N/A
WNT7B	7477	Wnt7b	22422	wingless-type MMTV integration site family, member 7B [Source:HGNC Symbol;Acc:12787]	Tier 3A	0	N	Y	N	EXC	2.00246	0.0447583	0.127931	0.0167722	4.73598	1.99158e-05	1.17653e-06	3.93832	2.57724e-07	3.64445e-09	5.79652	6.16953e-06	2.34207e-07	-0.788936	0.256043	0.149913	0	1	1	1.87053	0.0286249	0.0101461
WNT9A	7483	Wnt9a	216795	wingless-type MMTV integration site family, member 9A [Source:HGNC Symbol;Acc:12778]	Tier 3B	0	N	Y	N	EXC	2.15966	0.0759117	0.101247	0.13594	4.38776	0.00153282	0.000239321	4.15555	1.85911e-05	8.64406e-07	3.97296	0.00046179	4.81068e-05	-0.147485	0.897601	0.843555	0	1	1	-0.179412	0.849552	0.786897
CACNA1E	777	Cacna1e	12290	calcium channel, voltage-dependent, R type, alpha 1E subunit [Source:HGNC Symbol;Acc:1392]	Tier 3B	0	Y	N	N	EXC	42.3371	1.60614	13.9719	7.58776	4.73643	9.71699e-12	1.33963e-15	1.67943	2.2219e-08	1.38905e-10	2.45727	4.01602e-09	1.31689e-11	-3.0581	2.25204e-11	1.45484e-14	-2.27185	5.13031e-08	9.35523e-10	0.776958	0.000794026	0.000103746
PXDN	7837	Pxdn	69675	peroxidasin homolog (Drosophila) [Source:HGNC Symbol;Acc:14966]	Tier 3A	0	Y	Y	N	EXC	3.26639	0.0667543	0.720108	0.705347	5.24871	1.84966e-05	1.07611e-06	2.27563	3.46428e-06	1.01878e-07	2.39933	1.61349e-05	7.75303e-07	-2.96774	9.51615e-05	9.04399e-06	-2.8521	0.000314552	4.55725e-05	0.125027	0.732198	0.6404
CAMKV	79012	Camkv	235604	CaM kinase-like vesicle-associated [Source:HGNC Symbol;Acc:28788]	Tier 3B	3	Y	N	N	EXC	28.1514	5.81701	13.1855	6.91649	2.24873	7.01629e-07	1.72179e-08	1.00657	0.000412756	4.08871e-05	1.90592	2.45701e-06	7.22873e-08	-1.23827	5.21843e-05	4.34043e-06	-0.330479	0.191046	0.129369	0.906988	0.00159238	0.000253515
FAT4	79633	Fat4	329628	FAT atypical cadherin 4 [Source:HGNC Symbol;Acc:23109]	Tier 3B	0	N	Y	N	EXC	11.2241	0.419248	1.00984	5.42902	4.51944	1.464e-09	4.44034e-12	3.53084	9.35651e-11	2.31712e-14	1.01521	4.81811e-05	3.09601e-06	-0.993532	0.000522744	7.03067e-05	-3.50395	1.04709e-09	5.76651e-12	-2.51556	6.12441e-10	1.74452e-12
THSD4	79875	Thsd4	207596	thrombospondin, type I, domain containing 4 [Source:HGNC Symbol;Acc:25835]	Tier 3A	3	N	Y	N	EXC	0.861845	0.139445	0.335696	0.168125	2.4292	0.00273503	0.000487166	1.2904	0.00238821	0.000362402	2.24259	0.000525079	5.6223e-05	-1.1298	0.011401	0.00301772	-0.187435	0.692985	0.62133	0.958221	0.00601053	0.00136967
PLBD1	79887	Plbd1	66857	phospholipase B domain containing 1 [Source:HGNC Symbol;Acc:26215]	Tier 3A	3	N	Y	N	EXC	1.56482	0.0455345	0.159154	0.157488	4.313	0.00351525	0.000660616	3.81792	0.00013786	1.04299e-05	3.7815	0.00102169	0.0001266	-0.502742	0.515794	0.381513	0	1	1	-0.0226037	0.976438	0.965131
TRPM3	80036	Trpm3	226025	transient receptor potential cation channel, subfamily M, member 3 [Source:HGNC Symbol;Acc:17992]	Tier 3B	0	Y	N	N	EXC	8.87519	0.169553	1.83179	1.37342	5.81713	3.42785e-07	6.94691e-09	2.29243	7.1311e-08	6.26929e-10	2.77044	1.70896e-07	2.32776e-09	-3.51746	9.64902e-08	1.83405e-09	-3.05833	1.56953e-05	1.17163e-06	0.480821	0.0390797	0.0150042
NR4A3	8013	Nr4a3	18124	nuclear receptor subfamily 4, group A, member 3 [Source:HGNC Symbol;Acc:7982]	Tier 3B	0	Y	N	N	EXC	5.03491	0.763472	1.56672	1.50347	2.76012	5.65786e-05	4.1692e-06	1.67403	0.000240703	2.06994e-05	1.96943	0.0043522	0.000756379	-1.09009	0.0304647	0.0101516	-0.811172	0.324619	0.245449	0.294505	0.661195	0.556789
ACTN4	81	Actn4	60595	actinin, alpha 4 [Source:HGNC Symbol;Acc:166]	Tier 3B	0	N	Y	N	EXC	11.3268	4.73662	5.07969	3.11544	1.24448	9.01241e-05	7.46116e-06	1.10783	2.88983e-05	1.49752e-06	1.83567	9.18363e-07	2.13115e-08	-0.138733	0.539714	0.407553	0.596995	0.0125057	0.00465653	0.72946	0.00145491	0.000225862
OBSCN	84033	Obscn	380698	obscurin, cytoskeletal calmodulin and titin-interacting RhoGEF [Source:HGNC Symbol;Acc:15719]	Tier 3B	0	Y	N	N	EXC	0.0344997	0	0.00837938	0.00652995	1.98683	0.0495744	0.0176161	1.85347	0.0368201	0.0114569	2.44768	0.029256	0.00857364	0	1	1	0	1	1	0	1	1
ENC1	8507	Enc1	13803	ectodermal-neural cortex 1 (with BTB domain) [Source:HGNC Symbol;Acc:3345]	Tier 3B	0	Y	N	N	EXC	98.7329	4.29837	22.7465	17.2377	4.77583	8.52899e-10	1.68447e-12	2.1101	4.20104e-09	1.29253e-11	2.51142	9.78948e-09	4.75337e-11	-2.66471	8.42249e-09	8.00459e-11	-2.24241	2.21686e-06	1.02198e-07	0.401517	0.0382343	0.0146175
ITGA8	8516	Itga8	241226	integrin, alpha 8 [Source:HGNC Symbol;Acc:6144]	Tier 3A	0	N	Y	N	EXC	2.44251	0.00947793	0.171705	0.655424	6.00918	0.0025957	0.000457159	3.95655	5.17924e-05	3.07509e-06	2.14222	0.00413888	0.000708605	-2.02078	0.00397438	0.000820821	-3.87103	0.000259033	3.60191e-05	-1.83326	0.00042033	4.54714e-05
ACTN1	87	Actn1	109711	actinin, alpha 1 [Source:HGNC Symbol;Acc:163]	Tier 3A	0	N	Y	N	EXC	7.09359	1.7382	2.53587	2.33932	2.05662	1.8378e-05	1.06414e-06	1.23443	0.000110719	7.94476e-06	1.44415	3.88608e-05	2.34517e-06	-0.826692	0.0264661	0.00850518	-0.617159	0.0611603	0.0326102	0.216821	0.440456	0.324043
IL1RL2	8808	Il1rl2	107527	interleukin 1 receptor-like 2 [Source:HGNC Symbol;Acc:5999]	Tier 3B	3	N	Y	N	EXC	0.2063	0	0.0637702	0.014701	2.88475	0.00704769	0.00153808	2.20218	0.00821207	0.00169356	3.43657	0.00330109	0.00053457	0	1	1	0	1	1	0	1	1
KSR1	8844	Ksr1	16706	kinase suppressor of ras 1 [Source:HGNC Symbol;Acc:6465]	Tier 3A	1	Y	N	N	EXC	5.36235	1.88845	1.09227	1.92805	1.39289	7.7126e-05	6.14584e-06	2.28342	8.36446e-08	7.87146e-10	1.34138	8.03072e-05	5.763e-06	0.88871	0.000421752	5.42083e-05	-0.0547851	0.832109	0.783803	-0.938338	0.00073615	9.34946e-05
KALRN	8997	Kalrn	545156	kalirin, RhoGEF kinase [Source:HGNC Symbol;Acc:4814]	Tier 3A	2	Y	N	N	EXC	25.1687	3.83611	6.00098	4.44558	2.75581	2.50016e-10	1.9256e-13	2.05495	1.10172e-09	1.34262e-12	2.51786	1.65263e-09	3.85593e-12	-0.70081	4.00663e-05	3.18807e-06	-0.233977	0.187047	0.126283	0.461806	0.0110006	0.0029809
IL33	90865	Il33	77125	interleukin 33 [Source:HGNC Symbol;Acc:16028]	Tier 3A	4	N	Y	N	EXC	2.90578	0.56357	0.300693	0.21359	3.25833	0.00575134	0.00120641	3.27202	4.19546e-05	2.38817e-06	3.99217	0.000273649	2.55564e-05	0.0484767	0.959892	0.935636	0	1	1	0.720583	0.262929	0.166201
KL	9365	Kl	16591	klotho [Source:HGNC Symbol;Acc:6344]	Tier 3B	0	N	Y	N	EXC	2.60306	0.0640483	0.791312	0.109218	4.74276	1.14373e-05	5.9445e-07	1.98362	4.56322e-06	1.44366e-07	4.37766	7.85005e-07	1.69297e-08	-2.75645	0.000237883	2.70255e-05	0	1	1	2.38686	0.000128779	1.02711e-05
CD34	947	Cd34	12490	CD34 molecule [Source:HGNC Symbol;Acc:1662]	Tier 3A	2	N	Y	N	EXC	4.33227	0.0233929	0.496041	0.377621	5.10263	0.000455516	5.41018e-05	3.22376	1.2808e-05	5.42388e-07	3.45293	8.80834e-05	6.44323e-06	-1.86801	0.0181306	0.00534993	-1.63959	0.0393227	0.0190517	0.242295	0.638386	0.530509
CD53	963	Cd53	12508	CD53 molecule [Source:HGNC Symbol;Acc:1686]	Tier 3A	0	N	Y	N	EXC	2.52469	0.141048	0.29195	0.511798	3.26785	0.0144978	0.00375363	2.76457	0.000626136	6.84207e-05	2.16418	0.00895799	0.00189859	-0.45428	0.569715	0.440066	-1.10403	0.138258	0.0877497	-0.603987	0.183749	0.105193
CD68	968	Cd68	12514	CD68 molecule [Source:HGNC Symbol;Acc:1693]	Tier 3A	20	N	Y	N	EXC	2.81692	0.45359	1.04341	0.703762	2.22495	0.0299244	0.00932985	1.23921	0.0189763	0.00489563	1.72188	0.0153617	0.00373339	-1.01024	0.124143	0.0588696	-0.507946	0.479227	0.395374	0.477587	0.292789	0.190297
KBTBD11	9920	Kbtbd11	74901	kelch repeat and BTB (POZ) domain containing 11 [Source:HGNC Symbol;Acc:29104]	Tier 3B	0	Y	N	N	EXC	47.0502	9.66743	5.90404	8.51433	2.21895	5.09208e-06	2.10956e-07	2.77718	7.1311e-08	6.26238e-10	2.38222	9.17897e-07	2.11849e-08	0.570499	0.00211673	0.000381807	0.176344	0.312918	0.234764	-0.393313	0.0365696	0.0138362
CHRM4	1132	Chrm4	12672	cholinergic receptor, muscarinic 4 [Source:HGNC Symbol;Acc:1953]	Tier 1	0	Y	Y	N	PV	1.21887	2.35086	1.16764	0.100315	-1.06965	0.00655696	0.00141333	0.229494	0.669105	0.542136	3.27596	0.000213546	1.90681e-05	1.29916	0.00417681	0.000872483	4.34786	3.68232e-07	1.14106e-08	3.07125	0.00181889	0.000303204
CPS1	1373	Cps1	227231	carbamoyl-phosphate synthase 1, mitochondrial [Source:HGNC Symbol;Acc:2323]	Tier 1	17	Y	N	N	PV	0.00554855	1.36495	0.0938326	0.138742	-5.83617	2.04002e-05	1.21076e-06	-1.71806	0.10301	0.0437373	-2.33039	0.053243	0.0187851	4.12697	8.15647e-08	1.47022e-09	3.51459	1.35087e-05	9.72418e-07	-0.606514	0.366107	0.254772
AHR	196	Ahr	11622	aryl hydrocarbon receptor [Source:HGNC Symbol;Acc:348]	Tier 1	1	Y	N	Y	PV	0.996816	5.89635	2.31993	1.40713	-2.53811	2.32602e-06	8.09705e-08	-1.1591	0.0017019	0.00023771	-0.392057	0.362867	0.235779	1.38004	2.22786e-07	5.19838e-09	2.14855	3.84147e-07	1.2121e-08	0.766022	0.003003	0.000566667
ESRRB	2103	Esrrb	26380	estrogen-related receptor beta [Source:HGNC Symbol;Acc:3473]	Tier 1	0	Y	N	N	PV	0.0066357	0.637656	0.0326686	0.105985	-5.04656	5.15819e-05	3.69788e-06	0	1	1	0	1	1	4.54729	1.20237e-05	7.14788e-07	2.54655	0.000701326	0.000124679	-1.97042	0.0530968	0.0221344
F2R	2149	F2r	14062	coagulation factor II (thrombin) receptor [Source:HGNC Symbol;Acc:3537]	Tier 1	2	Y	Y	N	PV	0.533389	6.20123	2.5833	0.843074	-3.8221	1.6499e-06	5.24302e-08	-2.75632	0.000156807	1.2077e-05	-0.855268	0.190896	0.10013	1.08103	0.000216113	2.40944e-05	2.97544	2.68079e-08	3.99135e-10	1.88724	6.95826e-05	4.65252e-06
FGFR2	2263	Fgfr2	14183	fibroblast growth factor receptor 2 [Source:HGNC Symbol;Acc:3689]	Tier 1	10	Y	Y	N	PV	0.845627	3.57365	0.850722	0.488046	-1.94964	0.0353965	0.0114995	-0.06959	0.946977	0.915638	0.755028	0.51152	0.376261	1.87856	1.12284e-06	3.92998e-08	2.71659	2.28692e-06	1.06985e-07	0.817752	0.0496806	0.0203657
FLT3	2322	Flt3	14255	fms-related tyrosine kinase 3 [Source:HGNC Symbol;Acc:3765]	Tier 1	0	Y	Y	N	PV	0.712726	2.98535	0.519358	0.822336	-2.09194	0.000670281	8.74331e-05	0.648552	0.247938	0.138644	-0.0730007	0.912312	0.868302	2.74082	1.61195e-08	1.87005e-10	2.01471	2.93926e-06	1.4614e-07	-0.727707	0.0229818	0.00768337
FNTA	2339	Fnta	14272	farnesyltransferase, CAAX box, alpha [Source:HGNC Symbol;Acc:3782]	Tier 1	0	Y	N	N	PV	7.47476	18.0393	8.91343	7.8539	-1.29938	0.00104043	0.000149894	-0.267963	0.380476	0.246373	-0.003764	0.993099	0.988465	1.02778	1.29943e-05	7.85567e-07	1.2976	1.17599e-05	8.20032e-07	0.269454	0.115345	0.0582689
SLC29A2	3177	Slc29a2	13340	solute carrier family 29 (equilibrative nucleoside transporter), member 2 [Source:HGNC Symbol;Acc:11004]	Tier 1	0	Y	N	Y	PV	1.02496	3.68633	1.67227	1.9251	-1.93971	0.000580686	7.30911e-05	-0.887302	0.0478457	0.0160652	-0.93195	0.101955	0.0435653	1.05847	2.98345e-05	2.22141e-06	1.00821	0.00589938	0.00181833	-0.0469168	0.889777	0.842338
ITGB3	3690	Itgb3	16416	integrin, beta 3 (platelet glycoprotein IIIa, antigen CD61) [Source:HGNC Symbol;Acc:6156]	Tier 1	2	Y	Y	N	PV	0.142021	0.924162	0.176443	0.103983	-2.72203	0.00205412	0.000344218	-0.437095	0.592142	0.456886	0.0192514	0.987166	0.978213	2.27105	1.85494e-05	1.22609e-06	2.73617	7.40359e-05	7.84755e-06	0.464926	0.354592	0.243948
KCNH2	3757	Kcnh2	16511	potassium voltage-gated channel, subfamily H (eag-related), member 2 [Source:HGNC Symbol;Acc:6251]	Tier 1	6	Y	N	N	PV	0.657435	6.40964	3.00276	2.41169	-3.38512	3.98516e-07	8.62578e-09	-2.1804	6.41894e-06	2.21754e-07	-1.78306	0.00163069	0.000226844	1.20752	5.15982e-06	2.53984e-07	1.58782	0.000181128	2.32248e-05	0.398006	0.164467	0.0914734
KCNK3	3777	Kcnk3	16527	potassium channel, subfamily K, member 3 [Source:HGNC Symbol;Acc:6278]	Tier 1	0	Y	N	N	PV	0.741784	8.99005	2.71508	1.42665	-3.67054	8.16254e-08	1.03565e-09	-1.94254	6.7469e-05	4.3108e-06	-0.903439	0.0803305	0.0318374	1.73057	1.74011e-08	2.07577e-10	2.75623	1.1905e-07	2.7351e-09	1.03968	0.00191404	0.000322859
KIF11	3832	Kif11	16551	kinesin family member 11 [Source:HGNC Symbol;Acc:6388]	Tier 1	10	Y	N	N	PV	0.248407	0.659899	0.303989	0.189071	-1.56139	0.0221417	0.00638136	-0.483763	0.382013	0.24761	0.0155019	0.986751	0.977244	1.07416	0.0216849	0.00666453	1.5627	0.0133527	0.00504607	0.492298	0.321055	0.214613
MGST3	4259	Mgst3	66447	microsomal glutathione S-transferase 3 [Source:HGNC Symbol;Acc:7064]	Tier 1	0	N	N	Y	PV	8.17188	38.108	13.6859	7.4126	-2.27197	7.03531e-06	3.1591e-07	-0.834995	0.00950934	0.00203057	0.193721	0.660435	0.5385	1.43802	2.75462e-06	1.15912e-07	2.45872	1.1304e-06	4.36196e-08	1.03324	0.000845505	0.000112881
MAP3K9	4293	Map3k9	338372	mitogen-activated protein kinase kinase kinase 9 [Source:HGNC Symbol;Acc:6861]	Tier 1	0	Y	N	N	PV	1.83879	6.70815	2.55795	1.9627	-1.82915	1.34945e-06	4.0743e-08	-0.507492	0.0399158	0.0127047	-0.0662681	0.825763	0.746238	1.31694	1.35435e-08	1.51796e-10	1.76183	6.43803e-09	6.55147e-11	0.442245	0.00688855	0.00162861
MME	4311	Mme	17380	membrane metallo-endopeptidase [Source:HGNC Symbol;Acc:7154]	Tier 1	0	Y	Y	N	PV	1.32168	22.4898	5.28901	0.584627	-4.11639	3.48386e-10	4.08256e-13	-1.96312	1.7489e-06	4.1362e-08	1.43121	0.00371959	0.00062345	2.14785	7.71782e-10	2.73161e-12	5.54466	1.62002e-10	3.20861e-13	3.39611	1.11189e-07	1.40487e-09
MMP15	4324	Mmp15	17388	matrix metallopeptidase 15 (membrane-inserted) [Source:HGNC Symbol;Acc:7161]	Tier 1	2	Y	N	N	PV	0.270061	0.871177	0.384204	0.395115	-1.74146	0.00702301	0.00153212	-0.405598	0.440709	0.302078	-0.351831	0.56356	0.431648	1.32542	0.0022544	0.000412698	1.39267	0.00417258	0.00118577	0.0523491	0.894046	0.849147
MUSK	4593	Musk	18198	muscle, skeletal, receptor tyrosine kinase [Source:HGNC Symbol;Acc:7525]	Tier 1	0	Y	Y	N	PV	0.00942501	1.59043	0.272311	0	-5.20795	0.000468557	5.61997e-05	-2.62559	0.0370585	0.011559	0	1	1	2.59178	0.000161615	1.70651e-05	7.04515	1.42778e-06	5.85074e-08	4.44345	0.000391478	4.16956e-05
ATP1A3	478	Atp1a3	232975	ATPase, Na+/K+ transporting, alpha 3 polypeptide [Source:HGNC Symbol;Acc:801]	Tier 1	0	Y	N	N	PV	368.288	873.694	359.189	257.364	-1.64546	0.000801495	0.000109835	-0.363856	0.410678	0.273786	0.191178	0.716575	0.607674	1.304	1.13358e-08	1.2185e-10	1.85564	4.37033e-07	1.41778e-08	0.536049	0.0320888	0.0117335
OPRD1	4985	Oprd1	18386	opioid receptor, delta 1 [Source:HGNC Symbol;Acc:8153]	Tier 1	0	Y	N	N	PV	1.77556	19.1616	6.55899	0	-3.16267	3.2917e-08	2.85929e-10	-1.70092	2.02427e-05	9.58748e-07	6.45722	2.54879e-06	7.65054e-08	1.45978	7.5459e-06	3.98817e-07	9.61632	3.77082e-08	6.10357e-10	8.15549	4.83352e-07	9.21868e-09
	51776	Map3k20	65964	Mitogen-activated protein kinase kinase kinase MLT [Source:UniProtKB/Swiss-Prot;Acc:Q9NYL2]	Tier 1	0	Y	N	N	PV	1.50041	5.40829	1.09379	0.522562	-1.74267	3.61524e-05	2.41232e-06	0.55491	0.0966407	0.040267	1.74969	0.000482442	5.07145e-05	2.29507	3.85421e-10	9.09448e-13	3.4859	1.95751e-10	4.40932e-13	1.19538	0.000115602	8.97671e-06
SCN1A	6323	Scn1a	20265	sodium channel, voltage-gated, type I, alpha subunit [Source:HGNC Symbol;Acc:10585]	Tier 1	6	Y	N	N	PV	6.8936	73.228	27.7105	26.7936	-3.31307	1.05212e-09	2.32079e-12	-1.8812	4.78499e-06	1.52567e-07	-1.8313	6.42432e-06	2.455e-07	1.42134	5.32565e-07	1.53122e-08	1.4747	5.97249e-07	2.08845e-08	0.0448957	0.874829	0.820495
SHH	6469	Shh	20423	sonic hedgehog [Source:HGNC Symbol;Acc:10848]	Tier 1	0	Y	Y	N	PV	0.0749314	4.43028	1.1816	0.464661	-6.09309	5.58639e-06	2.36439e-07	-4.09881	0.00117289	0.000149806	-2.73948	0.0280538	0.0081121	2.00018	1.44286e-05	9.0031e-07	3.34134	1.4444e-06	5.94844e-08	1.33812	0.0373	0.0141772
TACR3	6870	Tacr3	21338	tachykinin receptor 3 [Source:HGNC Symbol;Acc:11528]	Tier 1	1	Y	Y	N	PV	0.282835	2.35591	1.15935	0.0923168	-2.97931	7.02327e-05	5.4755e-06	-1.90628	0.00809949	0.00166683	1.4835	0.105067	0.0454641	1.07623	0.00674056	0.0015843	4.46147	2.23998e-07	6.08872e-09	3.39121	0.000269198	2.58293e-05
TGFB3	7043	Tgfb3	21809	transforming growth factor, beta 3 [Source:HGNC Symbol;Acc:11769]	Tier 1	0	N	Y	N	PV	1.44323	8.10624	2.4929	0.418603	-2.63873	3.39961e-06	1.28889e-07	-1.06054	0.00835232	0.00172972	1.69326	0.0119345	0.0027236	1.57813	2.0359e-07	4.63039e-09	4.35038	1.27219e-08	1.53789e-10	2.75938	3.00619e-06	9.27489e-08
TGFBR2	7048	Tgfbr2	21813	transforming growth factor, beta receptor II (70/80kDa) [Source:HGNC Symbol;Acc:11773]	Tier 1	1	Y	Y	N	PV	0.547411	4.87407	0.735869	0.435847	-2.75785	1.71668e-05	9.79812e-07	-0.00417418	0.994604	0.991776	0.781128	0.24391	0.138194	2.75248	1.46137e-09	6.9922e-12	3.5436	6.5864e-09	6.74744e-11	0.781058	0.0436704	0.0173043
ALDH5A1	7915	Aldh5a1	214579	aldehyde dehydrogenase 5 family, member A1 [Source:HGNC Symbol;Acc:408]	Tier 1	2	Y	N	Y	PV	15.015	46.37	20.2587	20.2615	-1.68417	7.96586e-06	3.77235e-07	-0.540984	0.0583026	0.020816	-0.535084	0.0432264	0.014327	1.14679	5.99415e-06	3.02123e-07	1.15526	1.10059e-06	4.22435e-08	-0.000903334	0.995987	0.995
PLA2G7	7941	Pla2g7	27226	phospholipase A2, group VII (platelet-activating factor acetylhydrolase, plasma) [Source:HGNC Symbol;Acc:9040]	Tier 1	4	Y	Y	N	PV	1.77801	7.29562	2.55835	1.0729	-1.91043	0.00397796	0.000769706	-0.443193	0.437503	0.29909	0.880315	0.279759	0.165947	1.46757	1.09104e-06	3.78292e-08	2.7988	3.89213e-06	2.03559e-07	1.3225	0.00225019	0.000395445
MAP3K19	80122	Map3k19	22625	mitogen-activated protein kinase kinase kinase 19 [Source:HGNC Symbol;Acc:26249]	Tier 1	5	Y	N	N	PV	0.126687	1.3645	0.229695	0.0348948	-2.74118	0.0305804	0.00960996	-1.01507	0.335431	0.207879	1.53676	0.296276	0.179656	1.77195	0.00582138	0.00132012	4.29999	0.000518849	8.55063e-05	2.52311	0.00290261	0.000544015
AKR1C3	8644	Akr1c18	105349	aldo-keto reductase family 1, member C3 [Source:HGNC Symbol;Acc:386]	Tier 1	4	Y	N	N	PV	0	11.368	0.568788	0	-7.06071	6.39081e-06	2.80179e-07	-2.54758	0.0564428	0.01995	0	1	1	4.49401	1.04121e-06	3.5419e-08	7.95339	4.41972e-08	7.63686e-10	3.47703	0.00505795	0.00110217
FGF18	8817	Fgf18	14172	fibroblast growth factor 18 [Source:HGNC Symbol;Acc:3674]	Tier 1	0	Y	Y	N	PV	0.31468	6.58041	0.65732	0.434051	-4.8786	1.47454e-05	8.15177e-07	-1.7708	0.0482071	0.0162153	-0.870841	0.433462	0.299672	3.10072	2.79891e-08	3.94419e-10	4.00343	6.51156e-07	2.31698e-08	0.901959	0.11518	0.0581642
CCKBR	887	Cckbr	12426	cholecystokinin B receptor [Source:HGNC Symbol;Acc:1571]	Tier 1	0	Y	Y	N	PV	4.22021	8.06289	2.57834	0	-1.15769	0.00773421	0.00172576	0.568149	0.146974	0.0694287	6.47294	0.00012398	9.80417e-06	1.72109	4.55165e-08	7.12795e-10	7.63321	5.90563e-08	1.1253e-09	5.91415	5.74036e-06	2.05659e-07
DHRS3	9249	Dhrs3	20148	dehydrogenase/reductase (SDR family) member 3 [Source:HGNC Symbol;Acc:17693]	Tier 1	0	N	N	Y	PV	0.555486	2.62728	0.767149	0.225811	-2.21982	0.000680942	8.92777e-05	-0.487301	0.380178	0.246089	1.34933	0.0898023	0.0368938	1.72075	0.000273372	3.20013e-05	3.57855	3.8367e-05	3.56628e-06	1.86924	0.00749796	0.00181262
PPIF	10105	Ppif	105675	peptidylprolyl isomerase F [Source:HGNC Symbol;Acc:9259]	Tier 2	1	N	Y	N	PV	5.59396	14.6267	6.73508	5.98274	-1.4911	0.000992956	0.000141685	-0.359261	0.331504	0.204727	-0.0254021	0.966509	0.945804	1.12865	1.07713e-06	3.69939e-08	1.46519	0.0001413	1.71293e-05	0.336183	0.250206	0.155928
NEK7	140609	Nek7	59125	NIMA-related kinase 7 [Source:HGNC Symbol;Acc:13386]	Tier 2	0	Y	N	N	PV	6.93824	101.291	20.1134	2.32099	-3.93479	4.39909e-11	1.5162e-14	-1.59744	9.03537e-05	6.18133e-06	1.57043	3.55638e-05	2.09567e-06	2.33271	7.90019e-09	7.35846e-11	5.50365	5.18119e-14	3.53858e-18	3.15461	9.48617e-08	1.17483e-09
PHOSPHO1	162466	Phospho1	237928	phosphatase, orphan 1 [Source:HGNC Symbol;Acc:16815]	Tier 2	1	Y	N	N	PV	1.08249	3.30691	0.731518	0.228229	-1.64984	0.00950817	0.00221928	0.486974	0.444909	0.305967	2.05235	0.0280614	0.00811866	2.14641	7.20329e-06	3.78176e-07	3.71513	4.73051e-06	2.62339e-07	1.57615	0.0141686	0.00413854
ESRRG	2104	Esrrg	26381	estrogen-related receptor gamma [Source:HGNC Symbol;Acc:3474]	Tier 2	0	Y	N	N	PV	1.93231	24.0207	4.4232	3.26248	-3.9407	7.72058e-09	4.3108e-11	-1.56377	0.000304998	2.80223e-05	-0.993313	0.0143739	0.00342444	2.37644	8.29129e-11	1.10466e-13	2.94625	1.03419e-10	8.52459e-14	0.564806	0.0112636	0.00308007
SIRT3	23410	Sirt3	64384	sirtuin 3 [Source:HGNC Symbol;Acc:14931]	Tier 2	6	Y	N	N	PV	3.38693	9.67451	3.88561	3.03043	-1.23433	0.00320221	0.000588921	-0.209725	0.507787	0.366976	0.155266	0.694535	0.579874	1.02531	0.000687385	9.79111e-05	1.38801	0.000400026	6.0788e-05	0.362064	0.140206	0.0745263
BACE2	25825	Bace2	56175	beta-site APP-cleaving enzyme 2 [Source:HGNC Symbol;Acc:934]	Tier 2	1	Y	Y	N	PV	0.198589	0.730827	0.256053	0.0145736	-1.55203	0.0282851	0.00865693	0.221461	0.769221	0.672859	3.4998	0.00242904	0.000370069	1.80367	0.00173338	0.000300959	5.05356	9.33448e-06	6.18389e-07	3.26004	0.00139916	0.000215735
HDC	3067	Hdc	15186	histidine decarboxylase [Source:HGNC Symbol;Acc:4855]	Tier 2	0	Y	N	N	PV	0.0539141	1.18381	0.0561301	0.0459563	-3.13335	0.0166865	0.00447329	0	1	1	0	1	1	3.53968	0.00113097	0.000179686	3.67402	0.00383554	0.00106461	0	1	1
HUNK	30811	Hunk	26559	hormonally up-regulated Neu-associated kinase [Source:HGNC Symbol;Acc:13326]	Tier 2	0	Y	N	N	PV	1.43196	11.6916	3.27536	1.83605	-2.95009	5.84932e-06	2.49585e-07	-1.18814	0.0141458	0.00335165	-0.299563	0.600712	0.471274	1.76057	2.09133e-08	2.7005e-10	2.65059	1.2588e-08	1.5045e-10	0.881159	0.00321602	0.000618151
HCN1	348980	Hcn1	15165	hyperpolarization activated cyclic nucleotide-gated potassium channel 1 [Source:HGNC Symbol;Acc:4845]	Tier 2	1	Y	N	N	PV	6.25462	58.8224	19.4332	20.6343	-3.07496	2.14784e-09	7.10666e-12	-1.51353	6.6657e-05	4.2259e-06	-1.52765	2.25129e-05	1.17689e-06	1.55859	2.476e-07	5.87475e-09	1.54902	4.68728e-08	8.35527e-10	-0.0208073	0.940703	0.913616
	3690	Itgb3	16416	Integrin beta [Source:UniProtKB/TrEMBL;Acc:B4DTY9]	Tier 2	2	Y	Y	N	PV	0.142021	0.924162	0.176443	0.103983	-2.72203	0.00205412	0.000344218	-0.437095	0.592142	0.456886	0.0192514	0.987166	0.978213	2.27105	1.85494e-05	1.22609e-06	2.73617	7.40359e-05	7.84755e-06	0.464926	0.354592	0.243948
KCNJ12	3768	Kcnj12	16515	potassium inwardly-rectifying channel, subfamily J, member 12 [Source:HGNC Symbol;Acc:6258]	Tier 2	1	Y	Y	N	PV	0.571165	3.11525	0.784314	1.65698	-2.41681	2.23675e-05	1.34757e-06	-0.494505	0.273364	0.158079	-1.35518	0.00813093	0.00167226	1.92272	1.65236e-07	3.50898e-09	1.0523	0.000895478	0.000171365	-0.85503	0.00656855	0.00153343
SBK1	388228	Sbk1	104175	SH3 domain binding kinase 1 [Source:HGNC Symbol;Acc:17699]	Tier 2	0	Y	N	N	PV	1.55904	7.01648	3.04769	1.98379	-2.03124	7.38201e-06	3.37882e-07	-0.895004	0.00336026	0.00055609	-0.375118	0.313026	0.193722	1.13238	9.79707e-06	5.59301e-07	1.65918	1.68869e-05	1.28595e-06	0.520492	0.0340619	0.0126469
LDHB	3945	Ldhb	16832	lactate dehydrogenase B [Source:HGNC Symbol;Acc:6541]	Tier 2	0	Y	N	N	PV	19.8321	122.83	28.2287	15.5287	-2.81669	1.28013e-07	1.81051e-09	-0.704119	0.0254953	0.00713148	0.251225	0.537991	0.403103	2.10252	8.80401e-11	1.2695e-13	3.06959	1.04709e-09	5.90483e-12	0.965796	0.000543536	6.32425e-05
LIMK1	3984	Limk1	16885	LIM domain kinase 1 [Source:HGNC Symbol;Acc:6613]	Tier 2	0	Y	N	N	PV	0.519695	2.66972	0.925297	1.17632	-2.36148	7.1562e-06	3.2513e-07	-0.691872	0.0403773	0.0128841	-1.09835	0.0109212	0.00243451	1.67186	4.23401e-07	1.12948e-08	1.25021	0.000444974	7.01711e-05	-0.409202	0.0969423	0.0468293
LPL	4023	Lpl	16956	lipoprotein lipase [Source:HGNC Symbol;Acc:6677]	Tier 2	47	Y	Y	N	PV	1.5746	6.9212	2.4556	0.236726	-2.17338	2.22465e-07	3.84909e-09	-0.55857	0.0380072	0.0119561	3.06693	1.30247e-05	5.96288e-07	1.61477	2.48883e-07	5.92152e-09	5.2462	4.74054e-09	4.40318e-11	3.64311	8.88584e-07	2.01894e-08
MANBA	4126	Manba	110173	mannosidase, beta A, lysosomal [Source:HGNC Symbol;Acc:6831]	Tier 2	1	Y	N	N	PV	0.350289	3.84156	1.30465	1.90065	-3.37818	5.10721e-07	1.16177e-08	-1.85952	0.000484303	4.99535e-05	-2.30914	4.66272e-05	2.96676e-06	1.52161	1.56433e-06	5.7623e-08	1.06945	5.48655e-05	5.45147e-06	-0.458198	0.0441975	0.0175761
MITF	4286	Mitf	17342	microphthalmia-associated transcription factor [Source:HGNC Symbol;Acc:7105]	Tier 2	0	Y	N	N	PV	0.692548	1.8852	0.436789	0.196927	-1.30772	0.0103245	0.00246957	0.763903	0.0940005	0.0388352	1.92004	0.0105665	0.00234045	2.0721	6.95922e-07	2.16674e-08	3.21843	4.0997e-06	2.18117e-07	1.14919	0.0159432	0.00481681
NDUFA4	4697	Ndufa4	17992	NADH dehydrogenase (ubiquinone) 1 alpha subcomplex, 4, 9kDa [Source:HGNC Symbol;Acc:7687]	Tier 2	0	Y	N	N	PV	31.9567	97.7386	41.5235	29.81	-1.66303	2.70528e-05	1.70068e-06	-0.479586	0.0957688	0.0398147	0.170284	0.646456	0.52255	1.18378	2.95489e-07	7.2731e-09	1.83781	3.0594e-07	8.90113e-09	0.655537	0.00568559	0.00127733
P2RX4	5025	P2rx4	18438	purinergic receptor P2X, ligand-gated ion channel, 4 [Source:HGNC Symbol;Acc:8535]	Tier 2	0	Y	N	N	PV	0.540485	2.47481	0.950205	0.656843	-2.63405	0.0141175	0.00363276	-1.20406	0.213026	0.113749	-0.590852	0.629427	0.503725	1.42484	0.000408746	5.20276e-05	2.03776	0.000191442	2.47899e-05	0.608196	0.182976	0.104671
PYGM	5837	Pygm	19309	phosphorylase, glycogen, muscle [Source:HGNC Symbol;Acc:9726]	Tier 2	1	Y	N	N	PV	0.239858	3.29372	0.704375	1.43145	-4.50093	0.000201126	1.97701e-05	-2.11314	0.0456297	0.0151054	-3.26584	0.00429655	0.000744541	2.36429	6.62337e-07	2.04036e-08	1.22624	0.000795797	0.000147452	-1.13509	0.0051958	0.0011409
VAMP1	6843	Vamp1	22317	vesicle-associated membrane protein 1 (synaptobrevin 1) [Source:HGNC Symbol;Acc:12642]	Tier 2	0	N	Y	N	PV	3.43978	41.8018	7.50424	6.98888	-3.93786	5.45219e-07	1.26655e-08	-1.64512	0.00245648	0.000374281	-1.33503	0.0151098	0.00363953	2.29155	8.61957e-10	3.33326e-12	2.59918	1.34821e-09	8.37915e-12	0.304157	0.139972	0.0743587
CAPN2	824	Capn2	12334	calpain 2, (m/II) large subunit [Source:HGNC Symbol;Acc:1479]	Tier 2	0	Y	N	N	PV	2.43999	13.6346	5.01545	4.1805	-2.29511	2.38159e-07	4.16737e-09	-1.04048	0.000913845	0.000109082	-0.62131	0.0240444	0.0066585	1.25499	8.04247e-06	4.36466e-07	1.67076	5.0575e-07	1.69597e-08	0.416586	0.0564484	0.0238706
CTSF	8722	Ctsf	56464	cathepsin F [Source:HGNC Symbol;Acc:2531]	Tier 2	0	Y	N	N	PV	3.7977	11.171	4.87796	5.55665	-1.66388	0.00135765	0.00020617	-0.410906	0.343388	0.214394	-0.460794	0.37375	0.245773	1.25131	8.95281e-07	2.90935e-08	1.20708	0.000240444	3.26131e-05	-0.0422944	0.885327	0.835304
PKMYT1	9088	Pkmyt1	268930	protein kinase, membrane associated tyrosine/threonine 1 [Source:HGNC Symbol;Acc:29650]	Tier 2	0	Y	N	N	PV	2.0288	5.47704	1.93586	2.16142	-1.66221	0.00259659	0.000457495	-0.0751992	0.887733	0.830393	-0.14865	0.802227	0.715772	1.59059	1.0262e-06	3.45049e-08	1.50712	5.01004e-05	4.89644e-06	-0.0719825	0.799578	0.72219
ADAMTS8	11095	Adamts8	30806	ADAM metallopeptidase with thrombospondin type 1 motif, 8 [Source:HGNC Symbol;Acc:224]	Tier 3A	2	N	Y	N	PV	0.213605	5.56341	0.459179	0.22148	-5.41979	3.35918e-05	2.20673e-06	-2.05985	0.0222058	0.00594739	-0.661145	0.564006	0.432518	3.35186	8.07206e-08	1.42029e-09	4.75565	1.51048e-06	6.35471e-08	1.418	0.00885364	0.00226316
WIF1	11197	Wif1	24117	WNT inhibitory factor 1 [Source:HGNC Symbol;Acc:18081]	Tier 3A	1	N	Y	N	PV	0	1.63926	0.348447	0	-6.41107	4.94724e-06	2.0325e-07	-4.18693	0.00284692	0.000451669	0	1	1	2.19848	0.00128296	0.000209889	6.29884	2.12116e-06	9.6917e-08	4.1008	0.00560952	0.00125501
GPR176	11245	Gpr176	381413	G protein-coupled receptor 176 [Source:HGNC Symbol;Acc:32370]	Tier 3B	0	Y	N	N	PV	1.2816	18.985	2.79478	7.74584	-3.91821	1.14427e-09	3.15509e-12	-1.05396	0.00453011	0.000807534	-2.53109	4.05525e-07	7.1479e-09	2.8639	1.13411e-09	5.05471e-12	1.38417	1.02618e-05	6.95242e-07	-1.48629	4.02098e-05	2.36792e-06
CTHRC1	115908	Cthrc1	68588	collagen triple helix repeat containing 1 [Source:HGNC Symbol;Acc:18831]	Tier 3B	0	N	Y	N	PV	0.393105	6.58947	2.69596	1.49641	-4.08708	4.60206e-06	1.85262e-07	-2.80493	0.000254104	2.22451e-05	-1.88074	0.0170045	0.004272	1.26175	0.000283549	3.34713e-05	2.20289	2.50063e-05	2.09894e-06	0.931368	0.0256123	0.00881975
FBLN7	129804	Fbln7	70370	fibulin 7 [Source:HGNC Symbol;Acc:26740]	Tier 3B	0	N	Y	N	PV	0.0168293	3.24373	0.0129714	0.727086	-5.4735	0.000409419	4.74415e-05	0	1	1	-3.76861	0.00459194	0.000811654	6.82428	8.29866e-07	2.66523e-08	1.72711	0.00859404	0.00291183	-5.11936	8.63677e-05	6.13196e-06
ADM	133	Adm	11535	adrenomedullin [Source:HGNC Symbol;Acc:259]	Tier 3A	1	N	Y	N	PV	0.0223469	5.35603	0.552802	1.10418	-6.58913	7.03738e-06	3.17279e-07	-2.78191	0.0106963	0.00235885	-3.98904	0.0010551	0.000131405	3.80001	7.59651e-07	2.39491e-08	2.60635	8.61554e-05	9.4282e-06	-1.19633	0.0599056	0.0257072
CD109	135228	Cd109	235505	CD109 molecule [Source:HGNC Symbol;Acc:21685]	Tier 3B	0	N	Y	N	PV	0.0182269	0.919654	0.036739	0.0126213	-5.13678	0.000278591	2.96124e-05	0	1	1	0	1	1	4.20578	4.98947e-06	2.4102e-07	5.38009	3.17681e-05	2.84008e-06	0	1	1
ADAMTS15	170689	Adamts15	235130	ADAM metallopeptidase with thrombospondin type 1 motif, 15 [Source:HGNC Symbol;Acc:16305]	Tier 3A	0	N	Y	N	PV	0.140795	4.3681	0.400479	0.192523	-5.16599	4.40399e-08	4.17834e-10	-1.50347	0.0171463	0.00429082	-0.655035	0.282691	0.168638	3.67075	6.89762e-10	2.3509e-12	4.51483	1.24595e-09	7.36058e-12	0.842245	0.0562048	0.0237365
FGF9	2254	Fgf9	14180	fibroblast growth factor 9 [Source:HGNC Symbol;Acc:3687]	Tier 3A	0	N	Y	N	PV	1.6365	9.43664	2.63148	4.18435	-2.38882	3.28903e-07	6.62023e-09	-0.683521	0.0323792	0.00965243	-1.22911	0.000313921	3.02112e-05	1.70741	1.23284e-07	2.46456e-09	1.15956	5.47616e-06	3.17903e-07	-0.553915	0.0116683	0.00322975
FNDC5	252995	Fndc5	384061	fibronectin type III domain containing 5 [Source:HGNC Symbol;Acc:20240]	Tier 3B	0	N	Y	N	PV	6.87096	37.529	14.0025	12.8113	-2.48375	8.16254e-08	1.03049e-09	-1.0635	0.000384516	3.75184e-05	-0.919757	0.00422413	0.000726663	1.41843	1.13255e-09	4.97352e-12	1.56365	5.09851e-08	9.25643e-10	0.150013	0.353603	0.242939
COL6A5	256076	Col6a5	665033	collagen, type VI, alpha 5 [Source:HGNC Symbol;Acc:26674]	Tier 3B	1	N	Y	N	PV	0	0.514494	0.0528108	0.0763072	-5.77404	6.68702e-05	5.15344e-06	-1.90399	0.145109	0.068359	0	1	1	3.88838	8.40436e-05	7.78403e-06	2.80455	0.000451525	7.18338e-05	-1.11571	0.225169	0.13603
GABRD	2563	Gabrd	14403	gamma-aminobutyric acid (GABA) A receptor, delta [Source:HGNC Symbol;Acc:4084]	Tier 3B	0	Y	Y	N	PV	7.46284	41.3994	3.54574	0.604675	-2.65629	1.23864e-05	6.60857e-07	0.882698	0.0643	0.0236303	3.92138	0.00122437	0.000156964	3.52288	2.25204e-11	1.47607e-14	6.56315	1.04758e-08	1.18051e-10	3.03976	0.000128347	1.0216e-05
PARM1	25849	Parm1	231440	prostate androgen-regulated mucin-like protein 1 [Source:HGNC Symbol;Acc:24536]	Tier 3B	0	N	Y	N	PV	13.1736	46.0201	7.75594	19.627	-1.83247	0.000112201	9.69419e-06	0.808312	0.0292989	0.00849291	-0.589017	0.113393	0.0502268	2.62937	3.26033e-10	7.05191e-13	1.23986	1.77897e-05	1.37414e-06	-1.38969	1.65267e-06	4.56101e-08
GAS6	2621	Gas6	14456	growth arrest-specific 6 [Source:HGNC Symbol;Acc:4168]	Tier 3B	0	N	Y	N	PV	3.64832	16.5409	6.49102	7.92932	-2.08188	3.89253e-07	8.39844e-09	-0.719665	0.00691947	0.00137558	-0.988185	0.00151831	0.000207237	1.36206	1.81737e-08	2.21558e-10	1.09367	4.96682e-06	2.80872e-07	-0.265617	0.10719	0.0531004
IL1RAPL2	26280	Il1rapl2	60367	interleukin 1 receptor accessory protein-like 2 [Source:HGNC Symbol;Acc:5997]	Tier 3B	0	N	Y	N	PV	0.241099	5.07662	2.09112	0.12138	-3.94954	2.4402e-07	4.32296e-09	-2.83193	3.92981e-06	1.18731e-07	1.13769	0.0949085	0.039626	1.11934	2.2519e-05	1.5483e-06	5.09158	1.15216e-08	1.34558e-10	3.96755	9.94996e-08	1.24459e-09
PCSK1N	27344	Pcsk1n	30052	proprotein convertase subtilisin/kexin type 1 inhibitor [Source:HGNC Symbol;Acc:17301]	Tier 3B	0	N	Y	N	PV	11.1027	19.2383	9.46799	3.0032	-1.15403	0.0279325	0.00852395	0.132581	0.789496	0.700145	1.65225	0.0193129	0.00504074	1.27623	0.00010841	1.06087e-05	2.79667	2.08153e-05	1.66898e-06	1.53977	0.00307421	0.000582518
GP5	2814	Gp5	14729	glycoprotein V (platelet) [Source:HGNC Symbol;Acc:4443]	Tier 3B	0	N	Y	N	PV	0.0345095	0.69024	0.13163	0.208118	-3.22177	0.00925928	0.0021452	-0.597568	0.659949	0.531267	0	1	1	2.64967	0.000132967	1.34461e-05	1.96783	0.000856536	0.000161631	0	1	1
AQP4	361	Aqp4	11829	aquaporin 4 [Source:HGNC Symbol;Acc:637]	Tier 3B	0	N	Y	N	PV	0.692708	3.7195	0.269251	0.219616	-1.67647	0.0478269	0.0168335	2.1956	0.0198474	0.00517935	2.19089	0.0696946	0.0264091	3.86978	7.21618e-07	2.26082e-08	3.91804	7.99594e-05	8.62286e-06	0.0093283	0.989825	0.985841
ITGA9	3680	Itga9	104099	integrin, alpha 9 [Source:HGNC Symbol;Acc:6145]	Tier 3A	3	N	Y	N	PV	0.242109	2.7245	0.757753	0.868551	-3.39823	5.82662e-05	4.32569e-06	-1.64746	0.0118704	0.00269115	-1.84338	0.00833912	0.00172693	1.77518	1.99555e-07	4.51246e-09	1.55499	6.7828e-06	4.0719e-07	-0.205255	0.300478	0.197099
KCNA2	3737	Kcna2	16490	potassium voltage-gated channel, shaker-related subfamily, member 2 [Source:HGNC Symbol;Acc:6220]	Tier 3B	0	Y	N	N	PV	12.4316	48.9494	24.5451	13.7994	-2.07928	5.11329e-08	5.389e-10	-1.05767	0.000126329	9.32295e-06	-0.24181	0.289463	0.174102	1.0257	6.42361e-07	1.94425e-08	1.84247	9.30258e-10	4.69584e-12	0.809079	9.37692e-05	6.77464e-06
KCNC1	3746	Kcnc1	16502	potassium voltage-gated channel, Shaw-related subfamily, member 1 [Source:HGNC Symbol;Acc:6233]	Tier 3B	0	Y	N	N	PV	7.16712	50.7566	12.8438	18.7249	-2.70479	8.33678e-10	1.26428e-12	-0.735643	0.00157383	0.000215656	-1.33543	8.98443e-06	3.72227e-07	1.96433	3.3615e-10	7.49105e-13	1.36981	1.67727e-07	4.24987e-09	-0.6052	0.00338935	0.000659442
KCNS3	3790	Kcns3	238076	potassium voltage-gated channel, delayed-rectifier, subfamily S, member 3 [Source:HGNC Symbol;Acc:6302]	Tier 3B	0	Y	N	N	PV	0.168231	10.5612	2.48475	0.758461	-5.93786	4.43293e-07	9.93304e-09	-3.8818	4.29346e-05	2.45614e-06	-2.16832	0.0135118	0.0031841	2.07285	2.89238e-09	1.85786e-11	3.77026	7.69267e-10	3.415e-12	1.69827	1.95919e-05	9.69344e-07
SHISA2	387914	Shisa2	219134	shisa family member 2 [Source:HGNC Symbol;Acc:20366]	Tier 3B	0	N	Y	N	PV	0.133926	1.50387	0.40608	0.309688	-3.60725	0.00243658	0.00042376	-2.19955	0.0118076	0.00267046	-1.6465	0.0911314	0.0376007	1.44992	0.00933955	0.00236052	1.96486	0.00667428	0.00212645	0.523594	0.263223	0.16642
LBP	3929	Lbp	16803	lipopolysaccharide binding protein [Source:HGNC Symbol;Acc:6517]	Tier 3A	0	N	Y	N	PV	0.12559	3.09261	0.073691	0.0362496	-4.41344	6.58896e-05	5.02801e-06	0	1	1	0	1	1	4.92918	1.80192e-07	3.90926e-09	5.51971	1.45212e-05	1.06613e-06	0	1	1
HAPLN4	404037	Hapln4	330790	hyaluronan and proteoglycan link protein 4 [Source:HGNC Symbol;Acc:31357]	Tier 3A	19	N	Y	N	PV	7.59583	47.8978	4.73245	3.93256	-2.96677	1.52323e-07	2.31e-09	0.229423	0.565022	0.428119	0.517921	0.214883	0.116869	3.18857	1.56934e-11	7.20024e-15	3.48803	1.24351e-10	1.48307e-13	0.292754	0.276816	0.177156
LTBP1	4052	Ltbp1	268977	latent transforming growth factor beta binding protein 1 [Source:HGNC Symbol;Acc:6714]	Tier 3A	3	N	Y	N	PV	0.117018	0.639552	0.123118	0.0763824	-1.62485	0.0400305	0.0135045	0.628976	0.405019	0.268591	1.65155	0.107399	0.0466897	2.25328	8.04655e-05	7.38888e-06	3.29141	0.000192391	2.49523e-05	1.04414	0.107104	0.0530501
TM4SF1	4071	Tm4sf1	17112	transmembrane 4 L six family member 1 [Source:HGNC Symbol;Acc:11853]	Tier 3B	0	N	Y	N	PV	0.241654	6.48254	0.560687	0	-4.44782	0.00167575	0.000268222	-1.11028	0.390919	0.255676	1.35565	0.505151	0.369796	3.33463	2.83901e-05	2.08222e-06	5.83473	0.000339757	4.9866e-05	2.48631	0.0707946	0.0317609
ATP1B1	481	Atp1b1	11931	ATPase, Na+/K+ transporting, beta 1 polypeptide [Source:HGNC Symbol;Acc:804]	Tier 3B	6	Y	N	N	PV	632.517	1393.2	700.15	501.89	-1.45034	9.04411e-05	7.49988e-06	-0.406348	0.179209	0.0905478	0.0767497	0.824739	0.744959	1.06017	2.92911e-08	4.16607e-10	1.53832	9.38049e-10	4.86899e-12	0.471879	0.00251852	0.000455545
FURIN	5045	Furin	18550	furin (paired basic amino acid cleaving enzyme) [Source:HGNC Symbol;Acc:8568]	Tier 3A	4	N	Y	N	PV	1.14152	3.7069	1.18209	0.940824	-1.79608	4.54315e-06	1.80699e-07	-0.110255	0.71629	0.603808	0.565253	0.215912	0.117664	1.68712	3.00597e-08	4.31479e-10	2.34893	6.39811e-06	3.81038e-07	0.673042	0.0625046	0.0271399
TUBA8	51807	Tuba8	53857	tubulin, alpha 8 [Source:HGNC Symbol;Acc:12410]	Tier 3B	0	Y	Y	N	PV	1.29679	15.3648	3.07431	5.13213	-3.64024	1.28013e-07	1.80386e-09	-1.37865	0.00168414	0.000234643	-2.01851	0.000113455	8.78568e-06	2.26419	1.5743e-09	7.67361e-12	1.61407	1.71747e-06	7.4484e-08	-0.641529	0.00382362	0.000767376
VIT	5212	Vit	74199	vitrin [Source:HGNC Symbol;Acc:12697]	Tier 3B	0	N	Y	N	PV	0.106152	1.31775	0.0467892	0.0256891	-3.25397	0.00361475	0.000682236	1.40172	0.314565	0.19117	0	1	1	4.67689	1.15545e-05	6.81592e-07	4.8181	2.11319e-05	1.70013e-06	0	1	1
PLTP	5360	Pltp	18830	phospholipid transfer protein [Source:HGNC Symbol;Acc:9093]	Tier 3A	12	N	Y	N	PV	2.12485	19.484	1.15058	1.02825	-2.43652	0.00854297	0.00193861	1.10023	0.188231	0.096225	1.91778	0.10398	0.044771	3.52996	1.74609e-06	6.59263e-08	4.39178	3.15986e-05	2.82061e-06	0.826848	0.154612	0.0845203
CRTAC1	55118	Crtac1	72832	cartilage acidic protein 1 [Source:HGNC Symbol;Acc:14882]	Tier 3A	0	N	Y	N	PV	7.65909	14.5381	4.64389	0.785777	-1.07715	0.000317778	3.48073e-05	0.643894	0.0129574	0.00299468	3.6364	3.36458e-06	1.10328e-07	1.72027	3.40595e-08	4.95589e-10	4.71029	1.47608e-08	1.83476e-10	2.99315	4.94001e-06	1.71305e-07
PRELP	5549	Prelp	116847	proline/arginine-rich end leucine-rich repeat protein [Source:HGNC Symbol;Acc:9357]	Tier 3A	0	N	Y	N	PV	0.496391	11.2988	0.157777	0.294843	-4.52419	0.00172755	0.000278587	1.21702	0.420517	0.283209	0.774933	0.674621	0.555335	5.77348	8.15647e-08	1.47949e-09	5.34611	1.35166e-05	9.73914e-07	-0.458377	0.553063	0.438368
PVRL2	5819	Nectin2	19294	poliovirus receptor-related 2 (herpesvirus entry mediator B) [Source:HGNC Symbol;Acc:9707]	Tier 3A	41	N	Y	N	PV	0.0421928	2.12818	0.766464	0.762228	-5.69152	1.2821e-05	6.88465e-07	-4.16228	3.42442e-05	1.82543e-06	-4.00887	0.000124243	9.87173e-06	1.52487	0.000440144	5.71204e-05	1.67614	0.000813765	0.000151393	0.15297	0.662207	0.557847
NTN4	59277	Ntn4	57764	netrin 4 [Source:HGNC Symbol;Acc:13658]	Tier 3A	0	N	Y	N	PV	0.0913031	3.03399	1.21564	0.555421	-4.99411	5.61578e-05	4.12658e-06	-3.27695	0.00091999	0.000110085	-2.27118	0.0302201	0.00896236	1.72122	1.20907e-05	7.21145e-07	2.70621	8.14764e-06	5.19009e-07	1.00169	0.00805509	0.00199786
CACNG7	59284	Cacng7	81904	calcium channel, voltage-dependent, gamma subunit 7 [Source:HGNC Symbol;Acc:13626]	Tier 3B	0	Y	N	N	PV	11.6558	33.8241	17.7064	12.8464	-1.60051	6.38934e-07	1.5327e-08	-0.56486	0.00615735	0.00118551	-0.229626	0.44614	0.312172	1.03592	3.01141e-06	1.28829e-07	1.3679	5.74265e-05	5.77324e-06	0.329178	0.198529	0.115793
HCN2	610	Hcn2	15166	hyperpolarization activated cyclic nucleotide-gated potassium channel 2 [Source:HGNC Symbol;Acc:4846]	Tier 3B	0	Y	N	N	PV	0.747605	2.01134	0.882863	0.744848	-1.61025	0.0311765	0.00984918	-0.419988	0.534891	0.394876	-0.101401	0.911899	0.867687	1.21778	0.000474888	6.23141e-05	1.51007	0.00230538	0.000568237	0.303984	0.435691	0.318978
SCN1B	6324	Scn1b	20266	sodium channel, voltage-gated, type I, beta subunit [Source:HGNC Symbol;Acc:10586]	Tier 3A	0	N	Y	N	PV	18.3239	39.0994	8.53607	5.86474	-1.15192	4.94807e-05	3.51314e-06	1.06702	0.000297802	2.71953e-05	1.65225	4.75598e-05	3.04109e-06	2.21579	2.07428e-09	1.10546e-11	2.79951	1.56753e-08	1.96985e-10	0.592705	0.0459275	0.0184347
BCAN	63827	Bcan	12032	brevican [Source:HGNC Symbol;Acc:23059]	Tier 3B	0	N	Y	N	PV	0.318694	3.41445	0.526421	0.502257	-3.03976	7.35514e-05	5.79508e-06	-0.330733	0.62997	0.498141	-0.225024	0.782524	0.690396	2.71614	3.88347e-09	2.67264e-11	2.81225	1.55378e-07	3.86269e-09	0.10309	0.784335	0.704245
ST6GAL1	6480	St6gal1	20440	ST6 beta-galactosamide alpha-2,6-sialyltranferase 1 [Source:HGNC Symbol;Acc:10860]	Tier 3A	21	N	Y	N	PV	1.34275	3.21111	0.708563	0.747177	-1.10387	0.0368716	0.0121694	1.05263	0.0412446	0.0132298	0.846086	0.146743	0.0703284	2.15263	1.88589e-08	2.31148e-10	1.96135	1.32163e-06	5.31648e-08	-0.20513	0.454423	0.337701
SLC6A7	6534	Slc6a7	240332	solute carrier family 6 (neurotransmitter transporter), member 7 [Source:HGNC Symbol;Acc:11054]	Tier 3A	0	Y	N	N	PV	1.73542	4.84917	2.02616	1.84745	-1.13177	0.00671341	0.00144986	0.138867	0.709963	0.595812	0.10093	0.824374	0.744011	1.26871	3.6873e-06	1.64342e-07	1.22434	0.000218526	2.92453e-05	-0.0325652	0.903001	0.862099
TAC1	6863	Tac1	21333	tachykinin, precursor 1 [Source:HGNC Symbol;Acc:11517]	Tier 3B	0	N	Y	N	PV	1.02587	53.4284	34.2529	0.137711	-5.8128	3.16714e-09	1.37541e-11	-4.70475	4.15635e-06	1.27966e-07	2.59238	0.00567531	0.00105186	1.11763	0.00166936	0.000287656	8.40021	8.40215e-09	9.06665e-11	7.29465	9.47569e-06	3.82006e-07
TLL1	7092	Tll1	21892	tolloid-like 1 [Source:HGNC Symbol;Acc:11843]	Tier 3B	1	N	Y	N	PV	0.263668	2.92592	0.922207	0.436454	-3.5179	2.32602e-06	8.07489e-08	-1.96269	0.00118382	0.000152082	-0.937704	0.140593	0.0664042	1.54786	1.85851e-05	1.23032e-06	2.58015	3.89001e-06	2.02975e-07	1.02632	0.0164251	0.00500455
TRPC3	7222	Trpc3	22065	transient receptor potential cation channel, subfamily C, member 3 [Source:HGNC Symbol;Acc:12335]	Tier 3B	0	Y	N	N	PV	0.181539	5.41441	0.591086	2.33504	-5.04811	1.87021e-05	1.09064e-06	-2.07407	0.0263676	0.00745059	-3.9936	0.000130754	1.0488e-05	2.97726	2.02531e-08	2.58808e-10	1.05613	0.00042595	6.60365e-05	-1.91875	5.74036e-06	2.0534e-07
TRPM2	7226	Trpm2	28240	transient receptor potential cation channel, subfamily M, member 2 [Source:HGNC Symbol;Acc:12339]	Tier 3B	0	Y	N	N	PV	0.802757	2.75594	0.959903	1.11483	-1.84623	0.000111583	9.62231e-06	-0.295335	0.433441	0.29544	-0.366209	0.431827	0.298151	1.55028	8.22643e-07	2.63125e-08	1.47453	0.00014516	1.76964e-05	-0.070155	0.832681	0.764103
TSHB	7252	Tshb	22094	thyroid stimulating hormone, beta [Source:HGNC Symbol;Acc:12372]	Tier 3B	2	N	Y	N	PV	0.0063942	0.780513	0.311212	0.442647	-5.95189	1.18249e-06	3.37459e-08	-4.56692	1.79718e-05	8.31164e-07	-4.7665	0.000315125	3.03838e-05	1.37964	0.000182465	1.96852e-05	1.17187	0.0210184	0.00886688	-0.208873	0.682092	0.580257
TUBG1	7283	Tubg1	103733	tubulin, gamma 1 [Source:HGNC Symbol;Acc:12417]	Tier 3B	1	Y	Y	N	PV	3.21209	6.23798	3.27166	2.61082	-1.28265	0.0246991	0.00728698	-0.225338	0.663686	0.535732	0.147065	0.817666	0.735168	1.0579	0.000213961	2.37322e-05	1.42989	9.46122e-05	1.06145e-05	0.380058	0.143037	0.0765055
FZD4	8322	Fzd4	14366	frizzled family receptor 4 [Source:HGNC Symbol;Acc:4042]	Tier 3B	0	N	Y	N	PV	0.380251	0.826367	0.209964	0.278829	-1.22008	0.0414488	0.0140972	0.989754	0.0896611	0.0365925	0.30153	0.595383	0.465666	2.21774	9.81248e-05	9.34492e-06	1.51925	0.00131748	0.000280107	-0.695117	0.0951635	0.0457815
SPARCL1	8404	Sparcl1	13602	SPARC-like 1 (hevin) [Source:HGNC Symbol;Acc:11220]	Tier 3B	0	N	Y	N	PV	153.841	407.814	66.0884	76.4416	-1.59903	8.57376e-05	7.00345e-06	0.955861	0.00889273	0.00186917	0.741808	0.0370067	0.0117475	2.56653	5.566e-11	4.4583e-14	2.35342	3.25724e-10	9.56571e-13	-0.228771	0.228094	0.138405
TMEM25	84866	Tmem25	71687	transmembrane protein 25 [Source:HGNC Symbol;Acc:25890]	Tier 3B	0	N	Y	N	PV	2.37731	7.16387	2.24325	3.45392	-1.78647	1.08252e-05	5.52193e-07	-0.0698933	0.829629	0.752172	-0.622045	0.0670502	0.0251193	1.71906	1.0887e-07	2.11218e-09	1.15736	0.000218526	2.92672e-05	-0.549018	0.0279223	0.00983478
RELT	84957	Relt	320100	RELT tumor necrosis factor receptor [Source:HGNC Symbol;Acc:13764]	Tier 3B	0	N	Y	N	PV	0.132133	1.0724	0.326961	0.342729	-3.71241	0.000821423	0.000112928	-2.06581	0.0247086	0.00685176	-1.82605	0.072023	0.0275956	1.65354	4.8402e-05	3.96238e-06	1.89056	0.00018239	2.34185e-05	0.240544	0.501153	0.384779
WISP1	8840	Wisp1	22402	WNT1 inducible signaling pathway protein 1 [Source:HGNC Symbol;Acc:12769]	Tier 3A	0	N	Y	N	PV	0.20237	1.01123	0.219061	0.134128	-2.42571	0.00268755	0.000477226	-0.29828	0.712008	0.5979	1.14447	0.325283	0.20381	2.0974	0.00024198	2.75493e-05	3.5467	0.000572458	9.6765e-05	1.44415	0.107201	0.0531191
NOG	9241	Nog	18121	noggin [Source:HGNC Symbol;Acc:7866]	Tier 3A	0	N	Y	N	PV	0.178497	5.86198	1.59294	0.0770543	-5.04109	2.16684e-06	7.36149e-08	-3.10036	0.00132533	0.000175595	0	1	1	1.9505	7.27365e-06	3.82347e-07	5.71662	1.24289e-08	1.477e-10	3.7656	0.000229651	2.11462e-05
KCNG4	93107	Kcng4	66733	potassium voltage-gated channel, subfamily G, member 4 [Source:HGNC Symbol;Acc:19697]	Tier 3B	0	Y	N	N	PV	0.030685	4.26326	0.0162983	0.00866437	-6.67616	1.66097e-06	5.33542e-08	0	1	1	0	1	1	7.26774	2.86407e-09	1.80818e-11	7.40407	7.91542e-08	1.6326e-09	0	1	1
SLIT2	9353	Slit2	20563	slit homolog 2 (Drosophila) [Source:HGNC Symbol;Acc:11086]	Tier 3A	0	N	Y	N	PV	2.71668	12.7389	3.08769	0.154203	-1.91603	0.000157116	1.47293e-05	0.1307	0.77136	0.675369	4.50406	5.76382e-05	3.8709e-06	2.0401	1.06507e-09	4.39793e-12	6.42454	1.03419e-10	7.82616e-14	4.38229	1.36721e-08	1.06267e-10
CELSR1	9620	Celsr1	12614	cadherin, EGF LAG seven-pass G-type receptor 1 [Source:HGNC Symbol;Acc:1850]	Tier 3B	2	N	Y	N	PV	0.0530705	0.39818	0.0347972	0.0151052	-1.92441	0.0470868	0.0165212	0.903411	0.286959	0.168701	2.62135	0.053243	0.0187801	2.84245	0.000212876	2.35521e-05	4.57123	0.000694511	0.000123088	1.69624	0.0683269	0.0303661
HS3ST1	9957	Hs3st1	15476	heparan sulfate (glucosamine) 3-O-sulfotransferase 1 [Source:HGNC Symbol;Acc:5194]	Tier 3B	0	N	Y	N	PV	2.98718	27.5738	7.95477	4.49543	-3.21304	8.75625e-07	2.28156e-08	-1.48365	0.00179804	0.000254588	-0.644352	0.199429	0.105964	1.72972	2.91606e-07	7.05267e-09	2.5787	1.84387e-07	4.73497e-09	0.839663	0.00995045	0.00263472
PDE10A	10846	Pde10a	23984	phosphodiesterase 10A [Source:HGNC Symbol;Acc:8772]	Tier 1	4	Y	N	N	SST	3.81005	2.53772	10.1545	3.81181	0.558707	0.00345463	0.000645586	-1.45583	0.000879519	0.000103921	-0.0835066	0.656913	0.534095	-2.01133	6.25021e-05	5.41573e-06	-0.63935	0.000476789	7.72397e-05	1.38645	0.00104126	0.000148816
ADCY5	111	Adcy5	224129	adenylate cyclase 5 [Source:HGNC Symbol;Acc:236]	Tier 1	7	Y	N	N	SST	3.41926	3.02444	7.69443	2.30799	-0.0269845	0.958627	0.932723	-1.38179	0.00791602	0.00161829	0.432861	0.292087	0.176269	-1.36218	0.00646423	0.00150876	0.460581	0.0746098	0.0415037	1.84081	0.000446918	4.93033e-05
CHRNA2	1135	Chrna2	110902	cholinergic receptor, nicotinic, alpha 2 (neuronal) [Source:HGNC Symbol;Acc:1956]	Tier 1	0	Y	Y	N	SST	0.359316	0	1.06616	0	2.446	0.167552	0.0842899	-2.31107	0.0146155	0.0034928	3.75482	0.0313768	0.00943994	-4.74809	1.58475e-06	5.85827e-08	0	1	1	6.06314	1.21459e-06	3.05644e-08
GRIN3A	116443	Grin3a	242443	glutamate receptor, ionotropic, N-methyl-D-aspartate 3A [Source:HGNC Symbol;Acc:16767]	Tier 1	0	Y	N	N	SST	3.32516	1.00835	28.4905	4.24661	2.13239	0.000371816	4.19822e-05	-2.94452	2.80197e-09	6.76553e-12	-0.167731	0.563386	0.430803	-5.07959	1.77322e-11	9.29789e-15	-2.29269	2.80276e-06	1.38205e-07	2.77871	1.38105e-11	8.55189e-15
ADORA2A	135	Adora2a	11540	adenosine A2a receptor [Source:HGNC Symbol;Acc:263]	Tier 1	0	Y	Y	N	SST	0.119783	0.0899888	3.41142	0.0603669	0	1	1	-4.08849	0.00752487	0.00152482	0	1	1	-4.57036	0.01659	0.00481597	0	1	1	5.41695	0.00769299	0.00187835
DDC	1644	Ddc	13195	dopa decarboxylase (aromatic L-amino acid decarboxylase) [Source:HGNC Symbol;Acc:2719]	Tier 1	9	Y	N	N	SST	0.0866034	0	0.516283	0.159864	0	1	1	-2.42153	0.0269601	0.0076614	0	1	1	-3.29143	0.000103302	9.95304e-06	0	1	1	1.78125	0.0069688	0.00165263
DRD2	1813	Drd2	13489	dopamine receptor D2 [Source:HGNC Symbol;Acc:3023]	Tier 1	1	Y	Y	N	SST	0.276858	0.473548	9.85511	0.373555	-0.857849	0.43813	0.306751	-5.28744	0.000378157	3.66997e-05	-1.03681	0.301272	0.183597	-4.38892	0.000762669	0.000110724	-0.183581	0.79187	0.735571	4.24544	0.000137543	1.12086e-05
DRD3	1814	Drd3	13490	dopamine receptor D3 [Source:HGNC Symbol;Acc:3024]	Tier 1	0	Y	Y	N	SST	0	0	0.823068	0	0	1	1	-4.26765	0.00223944	0.000334973	0	1	1	-3.5846	0.00239869	0.000444945	0	1	1	4.65959	0.00187221	0.000314525
S1PR3	1903	S1pr3	13610	sphingosine-1-phosphate receptor 3 [Source:HGNC Symbol;Acc:3167]	Tier 1	0	Y	Y	N	SST	0.415947	0.30719	2.15308	0.377051	1.13453	0.281328	0.167086	-1.87051	0.0023444	0.000353722	0.619514	0.410326	0.279191	-2.96836	7.64487e-05	6.93986e-06	-0.511037	0.419234	0.3358	2.48528	5.77295e-06	2.07581e-07
GABRG1	2565	Gabrg1	14405	gamma-aminobutyric acid (GABA) A receptor, gamma 1 [Source:HGNC Symbol;Acc:4086]	Tier 1	0	Y	Y	N	SST	0.40786	0.30446	7.93247	0.444833	0.970092	0.35607	0.22969	-3.96998	1.90981e-06	4.58772e-08	0.231478	0.738883	0.635678	-4.91638	3.98322e-06	1.83014e-07	-0.74925	0.287964	0.212305	4.19235	5.02148e-08	5.43835e-10
GPX3	2878	Gpx3	14778	glutathione peroxidase 3 (plasma) [Source:HGNC Symbol;Acc:4555]	Tier 1	0	N	Y	Y	SST	0.88585	3.19785	17.5917	2.73553	-1.63543	0.113152	0.0506911	-4.35493	7.81586e-07	1.49523e-08	-1.51749	0.0303852	0.00903431	-2.76835	8.37454e-05	7.73947e-06	0.115061	0.87231	0.834599	2.84769	2.02295e-08	1.77881e-10
GRIK3	2899	Grik3	14807	glutamate receptor, ionotropic, kainate 3 [Source:HGNC Symbol;Acc:4581]	Tier 1	0	Y	N	N	SST	8.17588	4.33353	20.5244	2.53665	0.924478	0.000274203	2.89758e-05	-1.30523	1.54055e-06	3.45269e-08	1.72148	8.01779e-06	3.22572e-07	-2.22777	8.29129e-11	1.14123e-13	0.794391	0.00336665	0.000906387	3.02667	2.57996e-09	1.10234e-11
GRM1	2911	Grm1	14816	glutamate receptor, metabotropic 1 [Source:HGNC Symbol;Acc:4593]	Tier 1	0	Y	N	N	SST	12.5727	3.55422	26.9286	11.1467	1.68286	1.50948e-05	8.41781e-07	-1.15468	7.96541e-05	5.32605e-06	0.0522274	0.835467	0.758548	-2.84139	2.40496e-09	1.38715e-11	-1.64427	1.32649e-06	5.36002e-08	1.20349	1.86724e-05	9.13441e-07
HTR1B	3351	Htr1b	15551	5-hydroxytryptamine (serotonin) receptor 1B, G protein-coupled [Source:HGNC Symbol;Acc:5287]	Tier 1	0	Y	Y	N	SST	0.69275	0.425775	2.66188	0.132291	0.851566	0.424717	0.293294	-1.57966	0.0361477	0.0111764	2.26511	0.0430703	0.0142563	-2.40976	0.00409941	0.000854436	0	1	1	3.84126	0.000600035	7.21201e-05
HTR1D	3352	Htr1d	15552	5-hydroxytryptamine (serotonin) receptor 1D, G protein-coupled [Source:HGNC Symbol;Acc:5289]	Tier 1	1	Y	Y	N	SST	0.0578288	0.433732	1.46043	0	0	1	1	-4.57681	6.95891e-05	4.4678e-06	0	1	1	-1.14737	0.0424441	0.0153897	0	1	1	6.64643	2.08544e-06	6.01781e-08
LAMA4	3910	Lama4	16775	laminin, alpha 4 [Source:HGNC Symbol;Acc:6484]	Tier 1	0	N	Y	N	SST	0.0817745	0.113642	0.95476	0.0405281	-0.178621	0.899549	0.846721	-3.20142	0.000387876	3.79183e-05	1.13362	0.345287	0.220916	-2.99281	0.000349219	4.27165e-05	0	1	1	4.31487	2.9603e-05	1.61314e-06
MC3R	4159	Mc3r	17201	melanocortin 3 receptor [Source:HGNC Symbol;Acc:6931]	Tier 1	0	Y	Y	N	SST	0.0117656	0	0.356445	0	0	1	1	-3.15449	0.00159756	0.000219971	0	1	1	-2.64077	0.000417034	5.33832e-05	0	1	1	4.22875	1.4913e-05	6.86585e-07
NOS1	4842	Nos1	18125	nitric oxide synthase 1 (neuronal) [Source:HGNC Symbol;Acc:7872]	Tier 1	0	Y	N	Y	SST	5.83249	2.1609	14.1351	3.10399	1.26477	0.000371254	4.18675e-05	-1.50123	2.37462e-05	1.17908e-06	0.796167	0.00154399	0.000211376	-2.76249	6.96618e-08	1.178e-09	-0.466886	0.0540476	0.0281091	2.30615	1.12867e-07	1.43976e-09
OPRK1	4986	Oprk1	18387	opioid receptor, kappa 1 [Source:HGNC Symbol;Acc:8154]	Tier 1	0	Y	N	N	SST	0.726659	0.0543254	3.06398	0.41434	3.53557	0.00230037	0.000395473	-1.86341	0.00036717	3.54203e-05	1.73724	0.0402559	0.0130556	-5.35318	3.95011e-06	1.80784e-07	-1.81379	0.11198	0.0677983	3.59117	7.00948e-05	4.69332e-06
OXTR	5021	Oxtr	18430	oxytocin receptor [Source:HGNC Symbol;Acc:8529]	Tier 1	0	Y	Y	N	SST	0.550539	1.97299	5.70015	1.04821	-1.84579	0.00114069	0.000167482	-3.22575	4.2057e-06	1.30191e-07	-0.569767	0.34477	0.220454	-1.37509	0.000642543	9.03359e-05	1.27012	0.0076655	0.00251974	2.64467	1.00656e-05	4.15113e-07
TNNI3K	51086	Tnni3k	435766	TNNI3 interacting kinase [Source:HGNC Symbol;Acc:19661]	Tier 1	5	Y	N	N	SST	0.045761	0.0848455	0.588369	0	0	1	1	-3.72083	0.00275661	0.00043247	0	1	1	-2.15933	0.0234233	0.00734002	0	1	1	5.1762	0.000158703	1.33358e-05
PRKCH	5583	Prkch	18755	protein kinase C, eta [Source:HGNC Symbol;Acc:9403]	Tier 1	3	Y	N	N	SST	0.163673	0.0412891	1.26139	0.0520043	0	1	1	-3.0172	0.0123926	0.00283574	0	1	1	-3.33395	0.0107788	0.00282594	0	1	1	4.49299	0.00566402	0.00127036
PRKCQ	5588	Prkcq	18761	protein kinase C, theta [Source:HGNC Symbol;Acc:9410]	Tier 1	1	Y	N	N	SST	0.202947	0.176584	1.77547	0.067809	0.163926	0.881749	0.821211	-3.34026	4.19546e-05	2.38969e-06	1.70577	0.09302	0.0386146	-3.48534	6.9708e-05	6.19088e-06	0	1	1	5.05869	1.52234e-05	7.05127e-07
PRLR	5618	Prlr	19116	prolactin receptor [Source:HGNC Symbol;Acc:9446]	Tier 1	0	N	Y	N	SST	0.255185	0	0.825915	0.0285567	4.43454	0.000124001	1.09923e-05	-1.4469	0.00166843	0.00023164	3.45508	0.000534572	5.78462e-05	-5.85928	6.23687e-06	3.15993e-07	0	1	1	4.90517	5.47078e-05	3.46119e-06
PTGDR	5729	Ptgdr	19214	prostaglandin D2 receptor (DP) [Source:HGNC Symbol;Acc:9591]	Tier 1	0	Y	N	N	SST	0	0	0.597046	0	0	1	1	-5.3116	8.21968e-06	3.01266e-07	0	1	1	-3.8427	3.12961e-05	2.36305e-06	0	1	1	4.89684	2.99157e-05	1.64156e-06
SCN10A	6336	Scn10a	20264	sodium channel, voltage-gated, type X, alpha subunit [Source:HGNC Symbol;Acc:10582]	Tier 1	13	Y	N	N	SST	0.0484064	0	0.29186	0	0	1	1	-2.97274	0.00232478	0.000350186	0	1	1	-3.85602	1.44126e-05	8.97671e-07	0	1	1	5.44326	2.72195e-06	8.27592e-08
SLC22A3	6581	Slc22a3	20519	solute carrier family 22 (organic cation transporter), member 3 [Source:HGNC Symbol;Acc:10967]	Tier 1	10	Y	N	Y	SST	0.0827071	0	0.340974	0.0274348	0	1	1	-2.65014	0.0302346	0.00887246	0	1	1	-2.09931	0.0495066	0.0186838	0	1	1	3.00695	0.017588	0.00546731
SST	6750	Sst	20604	somatostatin [Source:HGNC Symbol;Acc:11329]	Tier 1	0	N	Y	N	SST	17.6254	40.8015	1193.34	2.87072	-1.03859	0.226746	0.125041	-5.78756	9.29961e-09	3.72222e-11	3.47716	0.0103095	0.00226109	-4.75252	2.45099e-08	3.33977e-10	4.54712	0.00112046	0.000229437	9.30965	1.9229e-08	1.65511e-10
SSTR1	6751	Sstr1	20605	somatostatin receptor 1 [Source:HGNC Symbol;Acc:11330]	Tier 1	0	Y	Y	N	SST	2.67853	0.250487	9.797	1.30245	3.43822	0.000122084	1.07803e-05	-1.85769	1.65348e-06	3.84912e-08	1.22057	0.000771733	9.02739e-05	-5.27042	1.897e-07	4.23986e-09	-2.22081	0.00169642	0.000386503	3.0718	1.23122e-08	8.92515e-11
TACR1	6869	Tacr1	21336	tachykinin receptor 1 [Source:HGNC Symbol;Acc:11526]	Tier 1	1	Y	Y	N	SST	0.119197	1.36349	4.32064	0.135443	-3.48604	8.58587e-05	7.02518e-06	-4.85493	6.24987e-05	3.88489e-06	0.532781	0.660664	0.53893	-1.34354	0.00771115	0.001866	4.03326	1.08334e-05	7.44743e-07	5.38585	4.18606e-05	2.48846e-06
TH	7054	Th	21823	tyrosine hydroxylase [Source:HGNC Symbol;Acc:11782]	Tier 1	1	Y	N	N	SST	0	0.303612	2.17503	0.113103	0	1	1	-6.76385	7.1695e-07	1.33163e-08	0	1	1	-2.16115	0.00147653	0.000247846	0	1	1	3.92618	0.000130875	1.04626e-05
TRPM8	79054	Trpm8	171382	transient receptor potential cation channel, subfamily M, member 8 [Source:HGNC Symbol;Acc:17961]	Tier 1	6	Y	N	N	SST	0	0	0.192989	0	0	1	1	-4.34992	1.00283e-05	3.91769e-07	0	1	1	-2.34608	0.000675034	9.5833e-05	0	1	1	4.1953	2.88441e-06	8.85918e-08
CALCR	799	Calcr	12311	calcitonin receptor [Source:HGNC Symbol;Acc:1440]	Tier 1	0	Y	Y	N	SST	0	0	0.370912	0	0	1	1	-4.96709	3.90375e-05	2.18728e-06	0	1	1	-3.4967	0.000242994	2.76806e-05	0	1	1	4.5543	0.000175765	1.52266e-05
DLK1	8788	Dlk1	13386	delta-like 1 homolog (Drosophila) [Source:HGNC Symbol;Acc:2907]	Tier 1	0	Y	Y	N	SST	0.900186	0	3.97555	0.0566161	4.46034	0.0717558	0.0282532	-2.44708	0.00903179	0.00190316	3.11137	0.125145	0.0572455	-6.87595	1.69542e-07	3.62264e-09	0	1	1	5.51723	8.63677e-05	6.14365e-06
CCKAR	886	Cckar	12425	cholecystokinin A receptor [Source:HGNC Symbol;Acc:1570]	Tier 1	0	Y	Y	N	SST	0	0.0415858	0.30528	0.0312094	0	1	1	-3.774	0.000494523	5.11607e-05	0	1	1	-1.57422	0.0439486	0.0160912	0	1	1	2.50892	0.00735665	0.00177163
CCNA1	8900	Ccna1	12427	cyclin A1 [Source:HGNC Symbol;Acc:1577]	Tier 1	0	Y	N	N	SST	0.0485392	0.092621	0.487483	0.10725	0	1	1	-2.76861	0.00438267	0.000774653	0	1	1	-1.7681	0.023214	0.00725529	0	1	1	1.84795	0.00216444	0.000377024
CD4	920	Cd4	12504	CD4 molecule [Source:HGNC Symbol;Acc:1678]	Tier 1	0	N	Y	N	SST	0.130756	0.0744018	1.9146	0.0607192	0	1	1	-4.02708	0.00543002	0.00101191	0	1	1	-4.41325	0.00371363	0.000754312	0	1	1	4.87405	0.00383878	0.000773509
HPSE	10855	Hpse	15442	heparanase [Source:HGNC Symbol;Acc:5164]	Tier 2	0	Y	Y	N	SST	0	0.0553688	1.11827	0.296407	0	1	1	-5.79065	6.7469e-05	4.30595e-06	-3.49452	0.0119344	0.00272283	-3.49787	0.000929358	0.000141076	-1.21849	0.23133	0.163132	2.27523	0.0130468	0.00374301
CHRNB3	1142	Chrnb3	108043	cholinergic receptor, nicotinic, beta 3 (neuronal) [Source:HGNC Symbol;Acc:1963]	Tier 2	2	Y	N	N	SST	0.0584299	0	0.661453	0.0136789	0	1	1	-3.26576	0.00551966	0.00103493	0	1	1	-4.43563	9.14004e-06	5.15801e-07	0	1	1	4.70236	0.000160631	1.35376e-05
STK32A	202374	Stk32a	269019	serine/threonine kinase 32A [Source:HGNC Symbol;Acc:28317]	Tier 2	0	Y	N	N	SST	0.0163936	0.0651397	1.88193	0.87842	0	1	1	-5.88947	2.18745e-06	5.53904e-08	-4.83173	6.5633e-05	4.53198e-06	-4.20825	8.06553e-06	4.38246e-07	-3.19554	0.000689943	0.000121902	1.05834	0.00044607	4.91675e-05
NPBWR1	2831	Npbwr1	226304	neuropeptides B/W receptor 1 [Source:HGNC Symbol;Acc:4522]	Tier 2	0	Y	Y	N	SST	0.210134	0.0332138	1.1669	0	1.65992	0.32396	0.201111	-2.36517	0.0111853	0.00248817	3.62879	0.0276556	0.0079751	-3.99293	5.05281e-06	2.45296e-07	0	1	1	5.97305	1.76292e-07	2.52174e-09
IDO1	3620	Ido1	15930	indoleamine 2,3-dioxygenase 1 [Source:HGNC Symbol;Acc:6059]	Tier 2	1	Y	N	N	SST	0	0.0335226	0.545843	0.0202753	0	1	1	-3.50311	0.00138048	0.000184013	0	1	1	-1.77972	0.021416	0.00656222	0	1	1	3.20744	0.00322719	0.000621098
KCNA5	3741	Kcna5	16493	potassium voltage-gated channel, shaker-related subfamily, member 5 [Source:HGNC Symbol;Acc:6224]	Tier 2	0	Y	N	N	SST	0.0759316	0.199641	0.991006	0.0577935	0	1	1	-3.41648	0.000750287	8.60749e-05	0	1	1	-2.162	0.00848495	0.00210126	0	1	1	3.69384	0.000433002	4.72443e-05
NMBR	4829	Nmbr	18101	neuromedin B receptor [Source:HGNC Symbol;Acc:7843]	Tier 2	1	Y	Y	N	SST	0.468825	0.215644	3.38973	0.46074	0.795133	0.571459	0.440704	-2.8768	0.0015173	0.000206571	0.0894703	0.940251	0.907759	-3.62862	2.54852e-05	1.82129e-06	-0.680944	0.286453	0.210996	2.93784	1.11424e-05	4.72631e-07
P2RY1	5028	P2ry1	18441	purinergic receptor P2Y, G-protein coupled, 1 [Source:HGNC Symbol;Acc:8539]	Tier 2	0	Y	Y	N	SST	0.110058	0.532025	2.35505	0.641036	-1.86683	0.117533	0.0533099	-4.10126	0.000673591	7.49139e-05	-2.52966	0.0153246	0.00372243	-2.25596	0.00761049	0.00183665	-0.66256	0.298448	0.222012	1.59547	0.00486508	0.00104878
STK32B	55351	Stk32b	64293	serine/threonine kinase 32B [Source:HGNC Symbol;Acc:14217]	Tier 2	2	Y	N	N	SST	0.605627	0	2.96123	0.808452	3.6308	0.00155682	0.00024417	-2.31876	1.04746e-05	4.13745e-07	-0.381883	0.444195	0.310213	-5.93993	2.00626e-08	2.49845e-10	-4.0134	2.50613e-05	2.11041e-06	1.9392	6.1544e-07	1.25001e-08
SFRP1	6422	Sfrp1	20377	secreted frizzled-related protein 1 [Source:HGNC Symbol;Acc:10776]	Tier 2	0	Y	Y	N	SST	0.364476	0.746104	3.1356	0.338162	-1.14907	0.115993	0.0523317	-3.02602	4.49844e-05	2.58454e-06	-0.0276145	0.971627	0.954261	-1.86966	0.00116381	0.000185971	1.12799	0.033405	0.015596	3.00174	3.00619e-06	9.28906e-08
KLF5	688	Klf5	12224	Kruppel-like factor 5 (intestinal) [Source:HGNC Symbol;Acc:6349]	Tier 2	0	Y	N	N	SST	1.44308	6.12398	15.0468	0.626582	-2.25608	6.25322e-05	4.73291e-06	-3.41322	4.11901e-06	1.25978e-07	1.22573	0.0693048	0.0262041	-1.14724	0.00114546	0.000182589	3.48749	1.40525e-07	3.38789e-09	4.63121	3.94225e-07	7.07035e-09
GLRA3	8001	Glra3	110304	glycine receptor, alpha 3 [Source:HGNC Symbol;Acc:4328]	Tier 2	1	Y	Y	N	SST	0.437055	0.271641	10.2211	0.565558	0.451312	0.615513	0.490857	-4.72502	4.46438e-07	7.13107e-09	-0.4623	0.464376	0.330316	-5.18751	2.43185e-07	5.75407e-09	-0.911612	0.0530861	0.0275074	4.25551	2.09013e-08	1.8767e-10
SEMA3A	10371	Sema3a	20346	sema domain, immunoglobulin domain (Ig), short basic domain, secreted, (semaphorin) 3A [Source:HGNC Symbol;Acc:10723]	Tier 3A	1	N	Y	N	SST	1.77045	2.79633	8.98521	0.399045	-0.641011	0.0371119	0.0122927	-2.31626	2.6518e-07	3.80892e-09	2.16578	5.24709e-05	3.44021e-06	-1.68201	1.35863e-07	2.77835e-09	2.81819	3.6032e-08	5.78303e-10	4.48345	6.44982e-10	1.87715e-12
ESM1	11082	Esm1	71690	endothelial cell-specific molecule 1 [Source:HGNC Symbol;Acc:3466]	Tier 3B	0	N	Y	N	SST	0.0146748	0.245459	1.55617	0.402302	0	1	1	-4.92829	2.19787e-05	1.06138e-06	-2.86521	0.00888453	0.00187966	-2.64189	0.000212939	2.3573e-05	0	1	1	2.06553	7.21089e-05	4.85484e-06
PLIN2	123	Plin2	11520	perilipin 2 [Source:HGNC Symbol;Acc:248]	Tier 3B	0	N	Y	N	SST	0	0	0	0	0	1	1	0	1	1	0	1	1	0	1	1	0	1	1	0	1	1
COL1A1	1277	Col1a1	12842	collagen, type I, alpha 1 [Source:HGNC Symbol;Acc:2197]	Tier 3A	0	N	Y	N	SST	0.0810799	0.156343	0.811751	0.0481684	0	1	1	-3.13868	0.00111445	0.000140272	-0.0356135	0.987268	0.978498	-2.11551	0.0010718	0.000167897	0	1	1	3.11159	0.0111664	0.00304045
COL1A2	1278	Col1a2	12843	collagen, type I, alpha 2 [Source:HGNC Symbol;Acc:2198]	Tier 3A	1	N	Y	N	SST	0.112603	0.206795	1.02403	0.0979152	0	1	1	-2.72448	0.00257418	0.000396519	-0.118944	0.94991	0.921517	-2.72051	0.000475743	6.25198e-05	0	1	1	2.61212	0.0176578	0.00550433
PROKR2	128674	Prokr2	246313	prokineticin receptor 2 [Source:HGNC Symbol;Acc:15836]	Tier 3B	0	Y	Y	N	SST	0.930933	0.30996	3.18441	0.0378703	1.66844	0.0179066	0.00487362	-1.6623	0.000643313	7.08553e-05	4.52001	0.000165184	1.39372e-05	-3.33327	5.5627e-05	4.71063e-06	0	1	1	6.16257	1.91209e-05	9.40122e-07
COL8A1	1295	Col8a1	12837	collagen, type VIII, alpha 1 [Source:HGNC Symbol;Acc:2215]	Tier 3A	2	N	Y	N	SST	0.0760273	0	0.25162	0.0521067	0	1	1	-1.73408	0.019358	0.00502527	0	1	1	-2.54952	0.00158794	0.00027019	0	1	1	1.78868	0.00739788	0.00178339
LYPD6	130574	Lypd6	320343	LY6/PLAUR domain containing 6 [Source:HGNC Symbol;Acc:28751]	Tier 3A	0	N	Y	N	SST	0.981815	13.1612	43.91	1.29513	-3.5524	1.76534e-07	2.82974e-09	-5.26816	1.34517e-09	2.48049e-12	-0.0977358	0.867569	0.804349	-1.71698	1.65846e-09	8.37003e-12	3.45368	4.63771e-10	1.64705e-12	5.16684	1.14172e-11	6.36289e-15
PRIMA1	145270	Prima1	170952	proline rich membrane anchor 1 [Source:HGNC Symbol;Acc:18319]	Tier 3A	0	N	Y	N	SST	0.0855143	0.176132	1.11461	0	0	1	1	-3.33258	0.00274839	0.000430499	0	1	1	-2.68844	0.00111509	0.000176943	0	1	1	5.31178	3.87401e-05	2.25798e-06
IL34	146433	Il34	76527	interleukin 34 [Source:HGNC Symbol;Acc:28529]	Tier 3B	0	N	Y	N	SST	1.1151	2.10725	5.71597	0.534424	-0.793122	0.0604536	0.0227988	-2.1	2.91349e-06	8.04493e-08	1.38006	0.00993872	0.00215596	-1.30703	3.94384e-05	3.12777e-06	2.17512	1.79268e-05	1.3982e-06	3.47761	1.25549e-08	9.40702e-11
GDF7	151449	Gdf7	238057	growth differentiation factor 7 [Source:HGNC Symbol;Acc:4222]	Tier 3A	0	N	Y	N	SST	0.0997712	0.0961809	0.477628	0.0866002	0	1	1	-1.96919	0.00495429	0.000901171	0.0799119	0.941476	0.909179	-2.55807	0.000209214	2.30373e-05	0	1	1	2.05972	0.000470396	5.27226e-05
FREM3	166752	Frem3	333315	FRAS1 related extracellular matrix 3 [Source:HGNC Symbol;Acc:25172]	Tier 3B	0	N	Y	N	SST	0.0264856	0	0.221574	0.0451576	0	1	1	-3.29597	0.00120423	0.000155673	0	1	1	-2.87724	0.000218578	2.45268e-05	0	1	1	2.39745	0.00270977	0.000499158
EPYC	1833	Epyc	13516	epiphycan [Source:HGNC Symbol;Acc:3053]	Tier 3B	0	N	Y	N	SST	0.352638	0	4.34451	0.0719455	0	1	1	-2.96041	0.00466423	0.000838013	0	1	1	-5.08381	0.000682042	9.70067e-05	0	1	1	5.15715	0.00325803	0.000628446
FAT1	2195	Fat1	14107	FAT atypical cadherin 1 [Source:HGNC Symbol;Acc:3595]	Tier 3B	0	N	Y	N	SST	1.32224	1.21537	3.18992	1.11001	0.15764	0.75669	0.661028	-1.17199	0.00178427	0.000252308	0.269641	0.524717	0.389683	-1.3332	1.09784e-05	6.42572e-07	0.122571	0.675037	0.601965	1.44301	4.30862e-06	1.4194e-07
SEMA3D	223117	Sema3d	108151	sema domain, immunoglobulin domain (Ig), short basic domain, secreted, (semaphorin) 3D [Source:HGNC Symbol;Acc:10726]	Tier 3B	0	N	Y	N	SST	0.280358	0.209061	0.568439	0.217415	-0.489894	0.713424	0.606708	-1.81349	0.0433881	0.0141269	-0.368205	0.757209	0.658632	-1.29573	0.0235776	0.00740228	0.133896	0.845554	0.800106	1.40619	0.00649166	0.00151227
GALR1	2587	Galr1	14427	galanin receptor 1 [Source:HGNC Symbol;Acc:4132]	Tier 3A	0	Y	Y	N	SST	0.013216	0	1.1548	0.276987	0	1	1	-5.33846	1.06742e-05	4.23611e-07	-2.63888	0.0495487	0.0170568	-4.52434	5.12443e-06	2.51107e-07	-1.81835	0.105667	0.063269	2.71511	0.0025511	0.000465072
GPR6	2830	Gpr6	140741	G protein-coupled receptor 6 [Source:HGNC Symbol;Acc:4515]	Tier 3B	0	Y	N	N	SST	0.0972765	0	2.76754	0.107771	0	1	1	-4.17666	0.00777042	0.0015842	0	1	1	-4.27349	0.00944413	0.00239465	0	1	1	3.7474	0.0193996	0.00621667
SERPINA9	327657	Serpina9	71907	serpin peptidase inhibitor, clade A (alpha-1 antiproteinase, antitrypsin), member 9 [Source:HGNC Symbol;Acc:15995]	Tier 3A	0	N	Y	N	SST	0	0.13311	1.36254	0	0	1	1	-4.50296	0.00309464	0.000501212	0	1	1	-2.5276	0.0418531	0.0151068	0	1	1	5.37113	0.00146006	0.000227024
IFIT1	3434	Ifit1bl1	667373	interferon-induced protein with tetratricopeptide repeats 1 [Source:HGNC Symbol;Acc:5407]	Tier 3B	0	N	Y	N	SST	1.05793	0.946014	2.36099	0.794343	-0.272923	0.727428	0.624785	-1.70853	0.00316136	0.000515541	-0.163782	0.826224	0.746726	-1.43955	0.00518206	0.00114492	0.111086	0.845526	0.799964	1.53961	0.00166351	0.000267796
IFIT1	3434	Ifit1bl2	112419	interferon-induced protein with tetratricopeptide repeats 1 [Source:HGNC Symbol;Acc:5407]	Tier 3B	0	N	Y	N	SST	0.0528794	0.204184	0.522865	0.192829	0	1	1	-2.5827	0.000959853	0.000116416	0	1	1	-1.58187	0.0172906	0.00504612	0	1	1	1.58711	0.00513788	0.00112268
GPR149	344758	Gpr149	229357	G protein-coupled receptor 149 [Source:HGNC Symbol;Acc:23627]	Tier 3B	0	Y	N	N	SST	0.0407568	0.258246	1.43435	0.171279	0	1	1	-4.94145	0.000206005	1.69375e-05	0	1	1	-2.69242	0.00302897	0.000589633	0	1	1	2.82882	0.00078901	0.000102944
AQP1	358	Aqp1	11826	aquaporin 1 (Colton blood group) [Source:HGNC Symbol;Acc:633]	Tier 3A	1	N	Y	N	SST	0.0182012	0	0.337711	0.0348004	0	1	1	-3.21345	0.00208677	0.000308002	0	1	1	-2.5676	0.00109148	0.00017191	0	1	1	2.27073	0.0309954	0.011255
IMPG1	3617	Impg1	63859	interphotoreceptor matrix proteoglycan 1 [Source:HGNC Symbol;Acc:6055]	Tier 3B	0	N	Y	N	SST	0.0182133	0	0.133666	0.0243507	0	1	1	-2.47789	0.0109765	0.00243288	0	1	1	-1.76015	0.00927752	0.00234051	0	1	1	2.0824	0.0164767	0.00502493
LGALS1	3956	Lgals1	16852	lectin, galactoside-binding, soluble, 1 [Source:HGNC Symbol;Acc:6561]	Tier 3B	0	N	Y	N	SST	0.6232	4.67481	23.7278	0.758372	-3.64224	0.00114284	0.000167956	-5.96176	0.00021151	1.75341e-05	-2.60969	0.244694	0.138842	-2.32013	0.00276383	0.000528963	1.03627	0.463256	0.379091	3.3522	0.0105156	0.00282214
NPY	4852	Npy	109648	neuropeptide Y [Source:HGNC Symbol;Acc:7955]	Tier 3B	0	N	Y	N	SST	31.3558	48.5757	203.113	51.5315	-0.147352	0.762658	0.668648	-2.34362	2.57768e-06	6.84638e-08	-0.426165	0.314577	0.195138	-2.19752	4.54358e-07	1.2329e-08	-0.278224	0.443067	0.359216	1.93222	8.06936e-06	3.15799e-07
NTS	4922	Nts	67405	neurotensin [Source:HGNC Symbol;Acc:8038]	Tier 3B	0	N	Y	N	SST	0.834119	0.0878184	6.26704	0.0793534	1.69868	0.163478	0.0816771	-3.05002	0.000140884	1.06762e-05	2.67561	0.0236648	0.00653507	-4.68265	8.38473e-06	4.61636e-07	0	1	1	5.70453	4.7247e-06	1.59743e-07
PAPPA	5069	Pappa	18491	pregnancy-associated plasma protein A, pappalysin 1 [Source:HGNC Symbol;Acc:8602]	Tier 3A	1	N	Y	N	SST	0.122242	0.0111175	0.376185	0.131455	2.17871	0.0945234	0.0401694	-1.64171	0.0221318	0.00592481	0.53815	0.610169	0.48204	-3.82367	0.00035285	4.33174e-05	-1.6416	0.139441	0.0886241	2.19396	0.00630513	0.00145657
RXFP3	51289	Rxfp3	239336	relaxin/insulin-like family peptide receptor 3 [Source:HGNC Symbol;Acc:24883]	Tier 3B	0	Y	Y	N	SST	0.0526178	0.431241	3.4325	0.196597	0	1	1	-5.7874	2.17854e-05	1.04935e-06	-1.58556	0.12928	0.0596997	-2.87491	0.000125877	1.25654e-05	1.30027	0.0262528	0.0116633	4.17078	1.27602e-05	5.65748e-07
PDYN	5173	Pdyn	18610	prodynorphin [Source:HGNC Symbol;Acc:8820]	Tier 3A	0	N	Y	N	SST	10.0386	0.48958	41.3932	0.113422	4.09334	0.000673677	8.79981e-05	-2.26903	3.82251e-06	1.14436e-07	6.43846	3.41935e-05	1.99883e-06	-6.35834	2.02531e-08	2.5655e-10	0	1	1	8.73397	2.22551e-08	2.02582e-10
GPR88	54112	Gpr88	64378	G protein-coupled receptor 88 [Source:HGNC Symbol;Acc:4539]	Tier 3B	0	Y	N	N	SST	1.6634	0.732666	17.1663	0.262971	1.35842	0.0818662	0.0334981	-3.4708	6.03413e-06	2.04724e-07	2.74186	0.00407295	0.000695777	-4.80867	3.82463e-06	1.72468e-07	1.38046	0.0626221	0.0335564	6.23968	1.45821e-06	3.83763e-08
RELN	5649	Reln	19699	reelin [Source:HGNC Symbol;Acc:9957]	Tier 3A	1	N	Y	N	SST	1.44985	2.4331	31.5018	2.52523	-0.850583	0.0160373	0.00425281	-4.6442	1.46428e-10	8.15908e-14	-0.870113	0.0105168	0.00232437	-3.79627	5.53843e-12	7.26019e-16	-0.0148762	0.948182	0.931669	3.76723	2.2523e-11	1.81311e-14
PTGFRN	5738	Ptgfrn	19221	prostaglandin F2 receptor inhibitor [Source:HGNC Symbol;Acc:9601]	Tier 3A	0	N	Y	N	SST	0.94102	0.955054	3.19441	0.92385	-0.585669	0.389504	0.259419	-2.08052	0.000237862	2.03078e-05	-0.317467	0.6009	0.471573	-1.49489	2.93959e-05	2.18104e-06	0.271214	0.387304	0.304202	1.76047	1.30386e-06	3.3426e-08
KLHL1	57626	Klhl1	93688	kelch-like family member 1 [Source:HGNC Symbol;Acc:6352]	Tier 3B	0	Y	N	N	SST	0.160598	0.544693	2.55411	0.0601473	-2.17592	0.0403805	0.0136615	-4.2622	2.03521e-05	9.65189e-07	0.793273	0.549051	0.414991	-2.0578	6.22298e-05	5.38806e-06	2.97455	0.00181992	0.000421903	5.04449	7.14205e-07	1.51253e-08
RLN1	6013	Rln1	19773	relaxin 1 [Source:HGNC Symbol;Acc:10026]	Tier 3B	0	N	Y	N	SST	0.207244	0	0.84772	0	0	1	1	-1.87404	0.0435601	0.0142002	0	1	1	-1.98161	0.0126152	0.00340992	0	1	1	3.32654	0.000711257	8.94081e-05
SEMA3F	6405	Sema3f	20350	sema domain, immunoglobulin domain (Ig), short basic domain, secreted, (semaphorin) 3F [Source:HGNC Symbol;Acc:10728]	Tier 3B	3	N	Y	N	SST	0.0873268	0.0146087	0.368778	0.0546061	0	1	1	-1.86575	0.0484296	0.0163231	-0.186271	0.888989	0.833547	-2.28117	0.00785885	0.00190792	0	1	1	1.6706	0.0326453	0.0120098
HHIP	64399	Hhip	15245	hedgehog interacting protein [Source:HGNC Symbol;Acc:14866]	Tier 3A	9	N	Y	N	SST	0.218018	0.0119504	2.77054	0.0366946	2.89032	0.014715	0.00382201	-2.92528	0.00138163	0.000184251	2.96352	0.00429115	0.000742792	-5.80399	0.00070224	0.00010057	0	1	1	5.92555	0.000285803	2.78564e-05
THBS1	7057	Thbs1	21825	thrombospondin 1 [Source:HGNC Symbol;Acc:11785]	Tier 3A	0	N	Y	N	SST	0.0622582	0.344541	0.690394	0.186616	0	1	1	-3.60949	0.000106268	7.54041e-06	-1.95364	0.150293	0.0725592	-1.24526	0.00802007	0.00195968	0.415982	0.685332	0.613017	1.66387	0.0214858	0.00708821
TIMP3	7078	Timp3	21859	TIMP metallopeptidase inhibitor 3 [Source:HGNC Symbol;Acc:11822]	Tier 3B	0	N	Y	N	SST	3.4854	4.18375	14.0212	3.01415	0.19561	0.801375	0.71693	-1.75442	0.00168414	0.000234791	0.411833	0.51087	0.375533	-1.95118	5.13296e-06	2.52325e-07	0.233944	0.516378	0.432972	2.14789	9.90744e-07	2.32517e-08
CA8	767	Car8	12319	carbonic anhydrase VIII [Source:HGNC Symbol;Acc:1382]	Tier 3A	0	Y	N	N	SST	0.111139	0.13532	0.747003	0.122914	0.531409	0.669686	0.55631	-2.62043	0.000358439	3.44107e-05	0.403749	0.682039	0.564194	-3.07178	0.000534164	7.23329e-05	0	1	1	3.0249	6.33691e-05	4.15162e-06
NDNF	79625	Ndnf	68169	neuron-derived neurotrophic factor [Source:HGNC Symbol;Acc:26256]	Tier 3B	0	N	Y	N	SST	0.958291	0.233473	2.08276	0.133206	2.16627	0.01255	0.00315244	-1.13196	0.0156787	0.00382358	2.74078	0.000867024	0.000104231	-3.27939	5.85829e-05	5.00318e-06	0	1	1	3.86595	7.47987e-06	2.87171e-07
CNTNAP3	79937	Cntnap3	238680	contactin associated protein-like 3 [Source:HGNC Symbol;Acc:13834]	Tier 3B	0	N	Y	N	SST	0.259512	6.00371	12.2747	1.87347	-4.55164	8.16254e-08	1.04437e-09	-5.58205	1.02113e-08	4.61508e-11	-2.98778	2.5019e-05	1.34419e-06	-1.01116	6.04047e-05	5.21024e-06	1.56283	1.18631e-05	8.30465e-07	2.58048	2.5182e-08	2.38582e-10
ADAMTS12	81792	Adamts12	239337	ADAM metallopeptidase with thrombospondin type 1 motif, 12 [Source:HGNC Symbol;Acc:14605]	Tier 3A	0	N	Y	N	SST	0	0	0.102273	0.00892031	0	1	1	-3.4399	0.00147782	0.000200188	0	1	1	-2.07857	0.0102761	0.00265709	0	1	1	2.87219	0.00324231	0.00062461
GPR101	83550	Gpr101	245424	G protein-coupled receptor 101 [Source:HGNC Symbol;Acc:14963]	Tier 3B	0	Y	Y	N	SST	1.90034	0.0202096	4.38521	0.869579	5.25149	0.000869744	0.000120807	-1.38841	0.000953375	0.00011543	1.01022	0.040608	0.0132104	-6.59666	6.11921e-08	1.00269e-09	-4.23841	2.56721e-05	2.17061e-06	2.39687	6.60511e-08	7.52579e-10
EMILIN2	84034	Emilin2	246707	elastin microfibril interfacer 2 [Source:HGNC Symbol;Acc:19881]	Tier 3A	0	N	Y	N	SST	0.193807	0.087052	0.905072	0.256859	0.178393	0.914514	0.867739	-2.91383	0.00231037	0.000347047	-1.08042	0.313296	0.194141	-3.1042	1.53661e-05	9.78483e-07	-1.26323	0.0465331	0.0234	1.85044	0.000106784	8.0804e-06
COL25A1	84570	Col25a1	77018	collagen, type XXV, alpha 1 [Source:HGNC Symbol;Acc:18603]	Tier 3A	0	N	Y	N	SST	3.3489	3.56433	12.2367	1.35522	-0.00217415	0.996171	0.993886	-1.80433	4.79572e-05	2.79988e-06	1.87412	0.0064891	0.00125133	-1.80159	1.07715e-06	3.70651e-08	1.88115	0.00230272	0.000566686	3.67039	5.88539e-06	2.13563e-07
GPR56	9289	Adgrg1	14766	G protein-coupled receptor 56 [Source:HGNC Symbol;Acc:4512]	Tier 3B	0	N	Y	N	SST	0.890166	1.39594	4.06218	1.46774	-0.507662	0.467978	0.336149	-2.03322	0.000330596	3.10403e-05	-0.524496	0.456418	0.321806	-1.52629	0.000109598	1.07544e-05	-0.0122747	0.984451	0.978467	1.51892	0.0013564	0.00020679
GPR52	9293	Gpr52	620246	G protein-coupled receptor 52 [Source:HGNC Symbol;Acc:4508]	Tier 3B	0	Y	N	N	SST	0.84614	0.324994	2.51932	0.340926	0.598192	0.552762	0.420631	-1.9842	0.0216422	0.00575759	1.01827	0.254551	0.145976	-2.60277	0.0117708	0.00314383	0	1	1	3.0258	0.00423046	0.00087404
CFTR	1080	Cftr	12638	cystic fibrosis transmembrane conductance regulator (ATP-binding cassette sub-family C, member 7) [Source:HGNC Symbol;Acc:1884]	Tier 1	0	Y	N	Y	VIP	0.0223603	0.0180478	0.181987	1.5256	0	1	1	-2.9581	0.00173037	0.000243134	-6.24265	7.87177e-06	3.13719e-07	-1.95926	0.0084565	0.00208904	-5.28958	1.61079e-05	1.20902e-06	-3.29643	4.24588e-07	7.86128e-09
CHAT	1103	Chat	12647	choline O-acetyltransferase [Source:HGNC Symbol;Acc:1912]	Tier 1	0	Y	N	N	VIP	0	0	0	3.12553	0	1	1	0	1	1	-7.15036	1.71345e-06	4.59211e-08	0	1	1	-5.99423	3.45177e-07	1.04199e-08	-8.3436	1.51637e-08	1.23007e-10
CHEK1	1111	Chek1	12649	checkpoint kinase 1 [Source:HGNC Symbol;Acc:1925]	Tier 1	0	Y	N	N	VIP	0.0778062	0.184695	0.251032	0.651379	0	1	1	-1.17889	0.180854	0.091502	-2.44552	0.0171252	0.00432117	-0.689272	0.348768	0.224961	-1.98686	0.0249004	0.010952	-1.26726	0.0204269	0.00664675
CHRNA3	1136	Chrna3	110834	cholinergic receptor, nicotinic, alpha 3 (neuronal) [Source:HGNC Symbol;Acc:1957]	Tier 1	28	Y	N	N	VIP	0.0222305	0	0.163648	1.86534	0	1	1	-2.41701	0.0148277	0.00356003	-5.64886	5.42056e-06	1.97641e-07	-1.54266	0.0547887	0.0211549	-4.78989	4.5954e-06	2.5265e-07	-3.21597	1.68588e-07	2.37254e-09
CHRNA4	1137	Chrna4	11438	cholinergic receptor, nicotinic, alpha 4 (neuronal) [Source:HGNC Symbol;Acc:1958]	Tier 1	0	Y	N	N	VIP	5.00666	2.83976	6.38699	22.1251	0.43188	0.388763	0.258657	-0.516017	0.121167	0.0539972	-2.38313	3.21743e-06	1.04042e-07	-0.953477	0.00031929	3.84855e-05	-2.82083	1.69415e-08	2.20996e-10	-1.8545	2.32236e-08	2.14971e-10
TNFRSF13C	115650	Tnfrsf13c	72049	tumor necrosis factor receptor superfamily, member 13C [Source:HGNC Symbol;Acc:17755]	Tier 1	0	N	Y	N	VIP	0.0299249	0	0.087149	0.498502	0	1	1	0	1	1	-3.05517	0.00772064	0.00156769	0	1	1	-2.34942	0.00325161	0.000869864	-2.79092	0.000254791	2.40133e-05
CLK1	1195	Clk1	12747	CDC-like kinase 1 [Source:HGNC Symbol;Acc:2068]	Tier 1	0	Y	N	N	VIP	9.48436	6.85309	7.8265	37.9445	0.526224	0.541154	0.40925	0.288198	0.66667	0.539174	-1.71177	0.0467051	0.0157863	-0.235633	0.273012	0.162678	-2.25251	0.00438124	0.00126362	-2.00912	0.00187221	0.000314527
CNR1	1268	Cnr1	12801	cannabinoid receptor 1 (brain) [Source:HGNC Symbol;Acc:2159]	Tier 1	0	Y	N	N	VIP	8.2148	8.92961	33.2623	210.281	0.00183817	0.995333	0.992726	-1.9982	1.69327e-07	1.99184e-09	-4.63741	2.04123e-10	5.14876e-14	-2.00262	7.24058e-09	6.26438e-11	-4.6376	8.79553e-11	4.80564e-14	-2.64209	3.9996e-09	2.00612e-11
ADRA1B	147	Adra1b	11548	adrenoceptor alpha 1B [Source:HGNC Symbol;Acc:278]	Tier 1	0	Y	Y	N	VIP	0.809621	0.941222	0.768704	24.4281	-0.316992	0.648052	0.529493	0.0691458	0.900131	0.847746	-5.03776	1.06573e-07	1.2527e-09	0.397535	0.362479	0.237429	-4.71168	4.80898e-07	1.59621e-08	-5.11615	6.03724e-10	1.60754e-12
CYP1B1	1545	Cyp1b1	13078	cytochrome P450, family 1, subfamily B, polypeptide 1 [Source:HGNC Symbol;Acc:2597]	Tier 1	0	Y	N	Y	VIP	0.103628	0.0226029	0.0650706	2.46921	0	1	1	0.162245	0.896789	0.843155	-4.84178	2.91297e-05	1.62854e-06	-0.669948	0.436432	0.303348	-5.72415	1.30175e-06	5.20986e-08	-4.98475	5.65007e-09	3.35876e-11
DHFR	1719	Dhfr	13361	dihydrofolate reductase [Source:HGNC Symbol;Acc:2861]	Tier 1	0	Y	N	N	VIP	0.145373	0.498932	0.466226	1.15063	-1.7872	0.0571828	0.021232	-1.6702	0.0290772	0.00840883	-2.96169	0.00079459	9.33486e-05	0.0912842	0.873684	0.808059	-1.17783	0.0210887	0.00890242	-1.27185	0.000909938	0.000124244
EGFR	1956	Egfr	13649	epidermal growth factor receptor [Source:HGNC Symbol;Acc:3236]	Tier 1	0	Y	Y	N	VIP	0.873345	0.555182	0.45963	30.9712	0.654134	0.101978	0.0443496	0.989193	0.0208945	0.0055147	-5.19977	1.39486e-10	1.92015e-14	0.335691	0.519758	0.385501	-5.85645	1.24351e-10	1.4886e-13	-6.18761	3.10418e-11	2.82288e-14
EPHA3	2042	Epha3	13837	EPH receptor A3 [Source:HGNC Symbol;Acc:3387]	Tier 1	2	Y	Y	N	VIP	1.42667	0.587061	1.0597	3.98793	1.13616	0.0505581	0.0181259	0.466965	0.162391	0.0793426	-1.40388	0.000156764	1.30785e-05	-0.671858	0.128751	0.0617468	-2.54572	8.28705e-06	5.30887e-07	-1.87583	2.55699e-07	3.97209e-09
F5	2153	F5	14067	coagulation factor V (proaccelerin, labile factor) [Source:HGNC Symbol;Acc:3542]	Tier 1	8	N	Y	N	VIP	0.0198345	0.272931	0.0244158	0.626554	-2.42331	0.0882609	0.0367901	0.467647	0.72704	0.61721	-4.30978	8.82893e-05	6.46386e-06	2.90697	0.0132048	0.00361342	-1.89379	0.0169118	0.00674649	-4.75402	3.15335e-06	9.82188e-08
FGF1	2246	Fgf1	14164	fibroblast growth factor 1 (acidic) [Source:HGNC Symbol;Acc:3665]	Tier 1	0	Y	Y	N	VIP	0.876109	1.90338	1.66432	12.4269	-1.11029	0.280323	0.166335	-1.2088	0.136342	0.0630206	-4.21807	2.98666e-05	1.67701e-06	-0.100305	0.818237	0.733823	-3.10366	8.40427e-08	1.74491e-09	-3.00569	4.69117e-09	2.41109e-11
FGFR3	2261	Fgfr3	14184	fibroblast growth factor receptor 3 [Source:HGNC Symbol;Acc:3690]	Tier 1	0	Y	Y	N	VIP	0.172411	0.216712	0.145921	0.749613	0.469484	0.702185	0.593365	0.863357	0.303802	0.18204	-1.57165	0.0243611	0.00677917	0.433645	0.646381	0.524366	-2.0355	0.00880271	0.00300276	-2.46274	9.77975e-05	7.20658e-06
L3MBTL1	26013	L3mbtl1	241764	l(3)mbt-like 1 (Drosophila) [Source:HGNC Symbol;Acc:15905]	Tier 1	0	Y	N	N	VIP	0.253402	0.0876457	0.207632	0.888588	1.5766	0.256021	0.147556	0.669902	0.437932	0.299438	-1.89732	0.00808989	0.00166052	-0.922988	0.311708	0.193415	-3.47835	0.000122648	1.44326e-05	-2.56653	3.925e-05	2.30168e-06
RPS6KA6	27330	Rps6ka6	67071	ribosomal protein S6 kinase, 90kDa, polypeptide 6 [Source:HGNC Symbol;Acc:10435]	Tier 1	0	Y	N	N	VIP	0.712244	0.447597	1.3242	3.40029	0.583303	0.418663	0.287815	-0.927842	0.0426262	0.0138076	-2.30908	0.000290415	2.74336e-05	-1.49848	0.00205792	0.000368368	-2.89496	0.000118791	1.39138e-05	-1.38754	0.000646794	7.94223e-05
GLRA1	2741	Glra1	14654	glycine receptor, alpha 1 [Source:HGNC Symbol;Acc:4326]	Tier 1	0	Y	Y	N	VIP	0.0603048	0.0960729	0.270524	0.86297	0	1	1	-1.82116	0.0230017	0.00622606	-3.32877	0.000287967	2.71297e-05	-1.26321	0.0942581	0.0415719	-2.74637	0.00127932	0.000269634	-1.51589	0.00487336	0.00105138
AMY2A	279	Amy1	11722	amylase, alpha 2A (pancreatic) [Source:HGNC Symbol;Acc:477]	Tier 1	0	Y	Y	N	VIP	0.3922	0.658531	0.852769	6.6628	-0.858947	0.356746	0.230249	-1.21148	0.102679	0.0435332	-3.85347	0.00157729	0.000217328	-0.368217	0.597417	0.470026	-3.00165	0.0102154	0.00360352	-2.63455	0.000751087	9.60427e-05
UTS2R	2837	Uts2r	217369	urotensin 2 receptor [Source:HGNC Symbol;Acc:4468]	Tier 1	0	Y	Y	N	VIP	0	0	0.0562414	1.7764	0	1	1	0	1	1	-6.26062	3.94152e-06	1.34715e-07	0	1	1	-4.5258	4.12837e-05	3.89097e-06	-5.01412	3.55569e-05	2.03887e-06
ANGPT1	284	Angpt1	11600	angiopoietin 1 [Source:HGNC Symbol;Acc:484]	Tier 1	0	N	Y	N	VIP	0.436679	0.0806917	0.327697	5.75324	2.22416	0.0421169	0.0143943	0.98279	0.186262	0.0948608	-3.25076	2.26837e-05	1.18869e-06	-1.21498	0.156477	0.0788794	-5.47043	3.85423e-06	2.00499e-07	-4.22406	6.17367e-07	1.26075e-08
GRIK2	2898	Grik2	14806	glutamate receptor, ionotropic, kainate 2 [Source:HGNC Symbol;Acc:4580]	Tier 1	0	Y	N	N	VIP	11.2411	9.6863	14.0863	31.0309	0.259573	0.429345	0.297801	-0.240351	0.394141	0.258448	-1.35056	0.000748283	8.69175e-05	-0.509895	0.0019293	0.000340539	-1.62189	1.39555e-05	1.0103e-06	-1.10925	0.000222977	2.03384e-05
GRM8	2918	Grm8	14823	glutamate receptor, metabotropic 8 [Source:HGNC Symbol;Acc:4600]	Tier 1	0	Y	N	N	VIP	1.83358	0.122328	1.39315	5.66988	3.74537	9.84913e-05	8.26249e-06	0.374254	0.163254	0.0798176	-1.66246	1.2721e-05	5.78373e-07	-3.34135	4.47991e-05	3.63514e-06	-5.4109	1.47376e-06	6.15994e-08	-2.04305	3.57785e-07	6.3364e-09
HCRTR2	3062	Hcrtr2	387285	hypocretin (orexin) receptor 2 [Source:HGNC Symbol;Acc:4849]	Tier 1	0	Y	Y	N	VIP	0.427917	0.137806	1.1911	9.4348	1.18055	0.201238	0.106785	-1.24421	0.0181734	0.00461657	-4.37768	3.10383e-06	9.84504e-08	-2.4317	0.00469699	0.00101101	-5.56203	7.27049e-05	7.67667e-06	-3.12644	1.99419e-06	5.72979e-08
HRH2	3274	Hrh2	15466	histamine receptor H2 [Source:HGNC Symbol;Acc:5183]	Tier 1	0	Y	N	N	VIP	0.283136	0.587696	1.28057	3.99804	-1.37779	0.118189	0.0536888	-2.17247	0.000738295	8.45163e-05	-3.87876	5.56268e-06	2.04856e-07	-0.830443	0.106792	0.0485444	-2.50167	0.000212082	2.82014e-05	-1.70606	2.43061e-06	7.23366e-08
HSD11B1	3290	Hsd11b1	15483	hydroxysteroid (11-beta) dehydrogenase 1 [Source:HGNC Symbol;Acc:5208]	Tier 1	0	Y	N	Y	VIP	0.544322	0.157066	0.366214	2.76853	0.986138	0.44878	0.316995	0.0795793	0.933899	0.896248	-2.79213	0.0019187	0.000277798	-0.847803	0.297403	0.182005	-3.76387	0.000575779	9.76016e-05	-2.88259	1.30684e-05	5.82522e-07
HTR3A	3359	Htr3a	15561	5-hydroxytryptamine (serotonin) receptor 3A, ionotropic [Source:HGNC Symbol;Acc:5297]	Tier 1	0	Y	N	N	VIP	0.403135	0.0638086	0.460733	35.8865	0.689224	0.59381	0.464954	-0.778132	0.377592	0.243554	-7.27425	3.52188e-07	5.89908e-09	-1.48076	0.0667452	0.0269308	-7.97017	5.82385e-07	2.02021e-08	-6.49708	2.17277e-09	8.78983e-12
ABCB5	340273	Abcb5	77706	ATP-binding cassette, sub-family B (MDR/TAP), member 5 [Source:HGNC Symbol;Acc:46]	Tier 1	0	Y	N	Y	VIP	0	0	0	0.17344	0	1	1	0	1	1	-4.16169	0.000598794	6.60795e-05	0	1	1	-2.17895	0.0236636	0.0103078	-5.04291	3.925e-05	2.29991e-06
IGF1	3479	Igf1	16000	insulin-like growth factor 1 (somatomedin C) [Source:HGNC Symbol;Acc:5464]	Tier 1	8	N	Y	N	VIP	0.555	1.0175	9.19958	94.0605	-0.955028	0.0251206	0.00744942	-3.95766	9.36366e-08	9.04365e-10	-7.41225	8.48169e-11	5.34853e-15	-3.00472	1.08807e-06	3.75836e-08	-6.4516	1.28465e-10	1.667e-13	-3.46985	5.44365e-09	3.13833e-11
IL4R	3566	Il4ra	16190	interleukin 4 receptor [Source:HGNC Symbol;Acc:6015]	Tier 1	0	N	Y	N	VIP	0.167667	0.0351608	0.688036	1.43847	1.31847	0.394854	0.264724	-2.18897	0.0129691	0.00299863	-3.34515	0.00227621	0.000342193	-3.44263	5.76486e-05	4.91206e-06	-4.65392	0.000263312	3.67219e-05	-1.1742	0.00438182	0.000920375
IL5RA	3568	Il5ra	16192	interleukin 5 receptor, alpha [Source:HGNC Symbol;Acc:6017]	Tier 1	0	N	Y	N	VIP	0	0	0.0623865	0.93056	0	1	1	0	1	1	-5.78483	1.44411e-05	6.75701e-07	0	1	1	-3.67326	0.000410529	6.29567e-05	-3.62533	9.5995e-05	6.99648e-06
KIT	3815	Kit	16590	v-kit Hardy-Zuckerman 4 feline sarcoma viral oncogene homolog [Source:HGNC Symbol;Acc:6342]	Tier 1	0	Y	Y	N	VIP	6.16483	2.11981	5.61569	77.7991	1.47998	0.00587659	0.00123714	0.343661	0.281561	0.164523	-3.43499	7.31834e-09	3.038e-11	-1.13698	0.000829215	0.00012245	-4.90823	1.38846e-10	2.12309e-13	-3.78359	6.3022e-12	1.77582e-15
LAMA3	3909	Lama3	16774	laminin, alpha 3 [Source:HGNC Symbol;Acc:6483]	Tier 1	0	N	Y	N	VIP	0.0877685	0.29943	0.0670706	1.87877	-1.75327	0.00248521	0.000434616	0.292302	0.6181	0.48512	-4.35068	1.65724e-06	4.3683e-08	2.04639	2.10219e-05	1.42745e-06	-2.60455	2.49714e-05	2.09261e-06	-4.64933	2.90542e-08	2.90706e-10
LAMA5	3911	Lama5	16776	laminin, alpha 5 [Source:HGNC Symbol;Acc:6485]	Tier 1	2	N	Y	N	VIP	0.0677008	0	0.0613449	0.565369	2.16049	0.0441461	0.0152641	0.472644	0.535596	0.395695	-2.92452	0.000249291	2.28257e-05	-1.67533	0.0364722	0.0127343	-5.0856	2.32151e-05	1.90896e-06	-3.41289	5.87312e-06	2.12027e-07
MC5R	4161	Mc5r	17203	melanocortin 5 receptor [Source:HGNC Symbol;Acc:6933]	Tier 1	0	Y	Y	N	VIP	0	0	0.00754798	0.719121	0	1	1	0	1	1	-5.49258	9.85636e-06	4.18917e-07	0	1	1	-4.28531	1.81614e-05	1.42394e-06	-5.39647	7.7598e-06	3.00801e-07
NPY5R	4889	Npy5r	18168	neuropeptide Y receptor Y5 [Source:HGNC Symbol;Acc:7958]	Tier 1	0	Y	Y	N	VIP	1.87214	0.35267	0.688654	7.05773	2.663	0.00379972	0.000727099	1.51586	0.00245919	0.000374847	-1.8635	0.000195349	1.72091e-05	-1.12373	0.0447575	0.0164632	-4.52461	3.76854e-06	1.94836e-07	-3.37473	4.75787e-08	5.09698e-10
PDE3A	5139	Pde3a	54611	phosphodiesterase 3A, cGMP-inhibited [Source:HGNC Symbol;Acc:8778]	Tier 1	1	Y	N	Y	VIP	0.0575864	0.26267	0.417095	2.45321	-1.76409	0.113967	0.0511583	-2.52483	0.0146296	0.00349798	-4.81053	2.80927e-05	1.55716e-06	-0.749611	0.181712	0.0957452	-3.04285	2.81357e-07	7.99376e-09	-2.29953	2.1916e-06	6.39201e-08
PDE3B	5140	Pde3b	18576	phosphodiesterase 3B, cGMP-inhibited [Source:HGNC Symbol;Acc:8779]	Tier 1	5	Y	N	Y	VIP	0.908419	0.432319	0.798788	2.2051	0.988476	0.364226	0.236809	0.0374135	0.959372	0.935673	-1.35194	0.0499023	0.0172068	-0.939339	0.0479028	0.017931	-2.34447	0.00164574	0.000371928	-1.39392	0.000973938	0.000136342
PDE4B	5142	Pde4b	18578	phosphodiesterase 4B, cAMP-specific [Source:HGNC Symbol;Acc:8781]	Tier 1	0	Y	N	N	VIP	8.07306	0.715791	7.34084	18.0813	3.56133	7.54829e-06	3.50696e-07	0.0269232	0.94715	0.915895	-1.1927	0.000458623	4.77479e-05	-3.52365	6.33535e-07	1.90596e-08	-4.74904	7.6245e-10	3.33266e-12	-1.20655	0.0001862	1.63197e-05
PDGFRA	5156	Pdgfra	18595	platelet-derived growth factor receptor, alpha polypeptide [Source:HGNC Symbol;Acc:8803]	Tier 1	4	Y	Y	N	VIP	0.0380572	0.0411842	0.0686775	1.21002	0	1	1	-0.629834	0.603919	0.469885	-5.18817	1.20845e-05	5.39605e-07	-0.0615676	0.959063	0.934421	-4.6342	4.81437e-06	2.70278e-07	-4.59916	3.18812e-07	5.34537e-09
HDAC7	51564	Hdac7	56233	histone deacetylase 7 [Source:HGNC Symbol;Acc:14067]	Tier 1	1	Y	N	N	VIP	0.651225	0.175287	0.315118	2.43522	2.03867	0.148973	0.0721811	1.25862	0.0934878	0.0385481	-1.80761	0.0116105	0.00263356	-0.767807	0.116987	0.0543797	-3.85494	2.38742e-05	1.97783e-06	-3.08117	3.3319e-07	5.65323e-09
KCNQ5	56479	Kcnq5	226922	potassium voltage-gated channel, KQT-like subfamily, member 5 [Source:HGNC Symbol;Acc:6299]	Tier 1	1	Y	N	N	VIP	3.35107	3.91615	3.60232	10.7319	-0.358792	0.367995	0.240401	-0.278314	0.514497	0.373641	-1.71944	3.57058e-05	2.10997e-06	0.0719653	0.859088	0.786901	-1.3595	4.62527e-06	2.55239e-07	-1.41303	0.00012083	9.47994e-06
CLK4	57396	Clk4	12750	CDC-like kinase 4 [Source:HGNC Symbol;Acc:13659]	Tier 1	0	Y	N	N	VIP	8.01672	6.73833	8.41847	31.7289	0.456721	0.487315	0.354717	0.054552	0.921555	0.877622	-1.63061	0.0206846	0.0055005	-0.393084	0.146788	0.0726676	-2.08637	0.00323603	0.000865033	-1.69561	0.0024888	0.00044832
CYP20A1	57404	Cyp20a1	77951	cytochrome P450, family 20, subfamily A, polypeptide 1 [Source:HGNC Symbol;Acc:20576]	Tier 1	6	Y	N	Y	VIP	0.731479	0.548043	0.903508	3.02491	-0.029566	0.985551	0.976557	-0.570065	0.547782	0.409141	-2.30513	0.0100928	0.00219778	-0.549454	0.250293	0.145464	-2.28666	1.21874e-05	8.57332e-07	-1.72212	3.87032e-06	1.24385e-07
PTHLH	5744	Pthlh	19227	parathyroid hormone-like hormone [Source:HGNC Symbol;Acc:9607]	Tier 1	0	N	Y	N	VIP	0	4.16099	1.32533	27.5754	-6.8023	1.23176e-06	3.58351e-08	-4.95542	1.02401e-05	4.03215e-07	-9.41124	1.10972e-08	6.08813e-11	1.83969	7.00165e-05	6.23205e-06	-2.6027	4.08445e-07	1.29714e-08	-4.45463	2.65124e-10	5.5819e-13
BCHE	590	Bche	12038	butyrylcholinesterase [Source:HGNC Symbol;Acc:983]	Tier 1	3	Y	Y	N	VIP	0.370705	0.0219512	0.412342	1.16097	2.70754	0.0357443	0.0116741	0.0921112	0.899854	0.847095	-1.60082	0.00672731	0.00131254	-2.63539	0.00310358	0.000606802	-4.31219	1.13662e-05	7.87919e-07	-1.68277	0.000184228	1.60649e-05
RXRA	6256	Rxra	20181	retinoid X receptor, alpha [Source:HGNC Symbol;Acc:10477]	Tier 1	0	Y	N	Y	VIP	1.50291	1.96327	2.27245	6.42187	-0.453156	0.374537	0.246301	-0.494028	0.148802	0.0704766	-2.03866	7.95315e-05	5.6973e-06	-0.0427842	0.897474	0.843008	-1.58105	0.000377177	5.63688e-05	-1.54553	7.20439e-06	2.73918e-07
MAPK12	6300	Mapk12	29857	mitogen-activated protein kinase 12 [Source:HGNC Symbol;Acc:6874]	Tier 1	0	Y	N	N	VIP	0.0388087	0	0.0456498	0.265789	0	1	1	0	1	1	-2.82008	0.0171295	0.00432649	0	1	1	-2.63516	0.00296008	0.000776105	-2.38541	0.000506709	5.79221e-05
SCN7A	6332	Scn7a	20272	sodium channel, voltage-gated, type VII, alpha subunit [Source:HGNC Symbol;Acc:10594]	Tier 1	0	Y	N	N	VIP	0.177465	0.983111	0.317685	8.83287	-2.38915	0.00615776	0.00130566	-1.0212	0.139197	0.0647898	-5.88292	1.0189e-07	1.18677e-09	1.35257	0.00338403	0.000676053	-3.48944	1.11127e-07	2.4742e-09	-4.85195	4.07343e-11	4.82952e-14
SLC9A3	6550	Slc9a3	105243	solute carrier family 9, subfamily A (NHE3, cation proton antiporter 3), member 3 [Source:HGNC Symbol;Acc:11073]	Tier 1	4	Y	N	N	VIP	0.0192963	0	0.0169246	0.226791	0	1	1	0	1	1	-3.00482	0.0154927	0.00378281	0	1	1	-2.14378	0.0340555	0.0159765	-3.02211	0.00375749	0.000749916
TPBG	7162	Tpbg	21983	trophoblast glycoprotein [Source:HGNC Symbol;Acc:12004]	Tier 1	0	Y	Y	N	VIP	2.16875	1.35839	2.14024	11.3377	0.597486	0.164062	0.0820107	0.103362	0.760737	0.660982	-2.39781	3.29238e-07	5.27346e-09	-0.497781	0.124696	0.0591974	-2.9914	2.88624e-08	4.33665e-10	-2.49645	6.51205e-09	4.03248e-11
TSHR	7253	Tshr	22095	thyroid stimulating hormone receptor [Source:HGNC Symbol;Acc:12373]	Tier 1	1	Y	Y	N	VIP	0	0.0953379	0.075856	1.04053	0	1	1	-2.9371	0.00268979	0.000419489	-6.61349	2.39006e-07	3.57198e-09	0.0755805	0.943091	0.910144	-3.6549	7.63105e-05	8.13555e-06	-3.68241	4.04991e-07	7.37304e-09
TYMS	7298	Tyms	22171	thymidylate synthetase [Source:HGNC Symbol;Acc:12441]	Tier 1	0	Y	N	N	VIP	0.163827	0.132626	0.190534	0.633707	0.253072	0.818834	0.738119	-0.519914	0.384933	0.250211	-2.01588	0.00272269	0.00042425	-0.730802	0.294586	0.179567	-2.26746	0.00393101	0.00109887	-1.49617	0.000241273	2.25451e-05
VDR	7421	Vdr	22337	vitamin D (1,25- dihydroxyvitamin D3) receptor [Source:HGNC Symbol;Acc:12679]	Tier 1	0	Y	N	N	VIP	0.00708798	0	0.0383224	0.364337	0	1	1	0	1	1	-3.68093	0.0061523	0.00116932	0	1	1	-2.43558	0.026579	0.0118373	-2.89764	0.0111782	0.00304702
CA4	762	Car4	12351	carbonic anhydrase IV [Source:HGNC Symbol;Acc:1375]	Tier 1	0	Y	Y	N	VIP	3.5828	0.272864	0.659731	8.64939	3.22547	0.00157244	0.000247567	2.448	6.72783e-05	4.28255e-06	-1.51161	0.000487297	5.13478e-05	-0.782875	0.190607	0.102006	-4.73593	1.35652e-06	5.50316e-08	-3.96125	5.30665e-09	2.85887e-11
ADAM12	8038	Adam12	11489	ADAM metallopeptidase domain 12 [Source:HGNC Symbol;Acc:190]	Tier 1	0	Y	Y	N	VIP	0.0141718	0	0.0540134	0.81876	0	1	1	0	1	1	-5.49949	2.65693e-06	8.09242e-08	0	1	1	-4.67925	7.22036e-06	4.42828e-07	-4.30586	6.9053e-08	7.95335e-10
TNFSF12	8742	Tnfsf12	21944	tumor necrosis factor (ligand) superfamily, member 12 [Source:HGNC Symbol;Acc:11927]	Tier 1	19	N	Y	N	VIP	0.441749	0.587535	0.40024	1.66096	-0.0413685	0.974208	0.956211	0.431233	0.58395	0.44805	-1.52012	0.0352576	0.0110054	0.478042	0.44079	0.307487	-1.47463	0.0164644	0.00652188	-1.9461	0.000108777	8.30384e-06
TNFRSF18	8784	Tnfrsf18	21936	tumor necrosis factor receptor superfamily, member 18 [Source:HGNC Symbol;Acc:11914]	Tier 1	0	N	Y	N	VIP	1.39223	1.13394	1.45105	5.65736	0.0473755	0.977576	0.963021	-0.725617	0.410777	0.273927	-2.35906	0.0111463	0.00249593	-0.788606	0.30974	0.191849	-2.42216	0.00739255	0.00241134	-1.62738	0.00128314	0.00019279
CACNA1G	8913	Cacna1g	12291	calcium channel, voltage-dependent, T type, alpha 1G subunit [Source:HGNC Symbol;Acc:1394]	Tier 1	1	Y	N	N	VIP	1.28942	0.603113	2.19591	3.72659	1.31322	0.0101353	0.00241314	-0.445726	0.119848	0.0532235	-1.49146	0.000668789	7.54907e-05	-1.76128	1.82523e-06	6.95062e-08	-2.80118	5.97075e-06	3.50693e-07	-1.04387	0.000764665	9.88077e-05
CCND2	894	Ccnd2	12444	cyclin D2 [Source:HGNC Symbol;Acc:1583]	Tier 1	0	Y	N	N	VIP	8.61851	2.17171	6.49287	20.2669	2.16319	9.99043e-05	8.41545e-06	0.670608	0.029437	0.00855163	-1.13882	0.00256779	0.000394933	-1.50108	0.000133978	1.36024e-05	-3.2941	4.34671e-07	1.40491e-08	-1.81647	1.00593e-05	4.14231e-07
KCNQ4	9132	Kcnq4	60613	potassium voltage-gated channel, KQT-like subfamily, member 4 [Source:HGNC Symbol;Acc:6298]	Tier 1	0	Y	Y	N	VIP	0.0671153	0.0130731	0.17368	2.16457	0	1	1	-1.64004	0.0877621	0.0355895	-5.25304	1.52284e-05	7.20223e-07	-1.51916	0.0423712	0.015355	-5.16863	2.12116e-06	9.68156e-08	-3.62825	7.23946e-08	8.42788e-10
PTGES	9536	Ptges	64292	prostaglandin E synthase [Source:HGNC Symbol;Acc:9599]	Tier 1	0	Y	N	N	VIP	0.00935714	0	0.272952	0.618651	0	1	1	-2.91223	0.031413	0.00930863	-4.54451	8.94756e-05	6.57892e-06	-1.91857	0.10289	0.0462424	-3.56593	0.000124618	1.4763e-05	-1.63447	0.0290824	0.0103446
HDAC9	9734	Hdac9	79221	histone deacetylase 9 [Source:HGNC Symbol;Acc:14065]	Tier 1	6	Y	N	N	VIP	2.18411	2.41451	2.74517	9.57614	0.0093454	0.975513	0.958635	-0.366694	0.117323	0.0517538	-2.05532	5.7145e-07	1.1207e-08	-0.376287	0.0842446	0.0359684	-2.06012	3.3925e-07	1.01817e-08	-1.69236	2.51498e-06	7.56878e-08
HCN4	10021	Hcn4	330953	hyperpolarization activated cyclic nucleotide-gated potassium channel 4 [Source:HGNC Symbol;Acc:16882]	Tier 2	2	Y	N	N	VIP	0.150751	0	0.488878	1.20289	0	1	1	-2.13832	0.00950934	0.00203019	-3.46206	0.000564118	6.16126e-05	-3.33251	8.67818e-05	8.09971e-06	-4.68214	4.77423e-05	4.6301e-06	-1.33291	0.00154379	0.000243485
NAMPT	10135	Nampt	59027	nicotinamide phosphoribosyltransferase [Source:HGNC Symbol;Acc:30092]	Tier 2	0	Y	N	N	VIP	12.163	10.6086	8.629	24.5019	0.195535	0.336478	0.212436	0.494473	0.0230634	0.00624704	-1.03921	6.37319e-05	4.3565e-06	0.29757	0.100924	0.0451732	-1.23662	1.49003e-06	6.23816e-08	-1.53944	6.46398e-07	1.35115e-08
STK38	11329	Stk38	106504	serine/threonine kinase 38 [Source:HGNC Symbol;Acc:17847]	Tier 2	0	Y	N	N	VIP	1.06989	1.4293	1.46474	3.80661	-0.0308892	0.9684	0.94744	0.0294484	0.956728	0.93185	-1.46054	0.00649339	0.00125385	0.0617697	0.863284	0.793178	-1.43177	0.00129749	0.000274705	-1.49154	9.4671e-05	6.87067e-06
CHRNA5	1138	Chrna5	110835	cholinergic receptor, nicotinic, alpha 5 (neuronal) [Source:HGNC Symbol;Acc:1959]	Tier 2	27	Y	N	N	VIP	0.213181	0.0545487	0.13679	6.10688	1.39199	0.192903	0.100886	1.12276	0.192876	0.0992921	-4.5544	3.43576e-07	5.67643e-09	-0.253849	0.803646	0.715997	-5.93816	7.59666e-08	1.5461e-09	-5.66908	1.02386e-08	7.03748e-11
PASK	23178	Pask	269224	PAS domain containing serine/threonine kinase [Source:HGNC Symbol;Acc:17270]	Tier 2	0	Y	N	N	VIP	0.0558587	0.0760069	0.127013	0.314578	0	1	1	-1.32374	0.1979	0.102675	-2.54315	0.0340396	0.0104815	-1.40343	0.0838619	0.0357665	-2.67989	0.0163436	0.00645282	-1.20798	0.028003	0.00987708
FOS	2353	Fos	14281	FBJ murine osteosarcoma viral oncogene homolog [Source:HGNC Symbol;Acc:3796]	Tier 2	0	Y	N	N	VIP	2.99797	4.19298	2.82669	10.9728	-0.293825	0.621122	0.497685	-0.000589937	0.998864	0.998617	-1.83283	0.000364115	3.60487e-05	0.285975	0.521052	0.386939	-1.5274	0.00106798	0.000215163	-1.82083	2.57161e-05	1.34879e-06
QPCT	25797	Qpct	70536	glutaminyl-peptide cyclotransferase [Source:HGNC Symbol;Acc:9753]	Tier 2	1	Y	Y	N	VIP	0.812458	0.76089	8.7602	27.0539	-0.253379	0.883659	0.823808	-4.01187	0.000328998	3.08181e-05	-5.49723	1.97358e-05	1.00309e-06	-3.75264	5.3287e-06	2.63344e-07	-5.25984	3.50367e-07	1.06244e-08	-1.47755	2.7198e-05	1.45514e-06
GLRA2	2742	Glra2	237213	glycine receptor, alpha 2 [Source:HGNC Symbol;Acc:4327]	Tier 2	0	Y	Y	N	VIP	2.94251	2.07878	8.72582	51.2107	0.625606	0.122037	0.0558914	-1.66551	6.66083e-05	4.21869e-06	-4.04644	2.39591e-09	6.19449e-12	-2.28799	5.48593e-06	2.72912e-07	-4.67185	8.35009e-10	3.93496e-12	-2.3929	1.39589e-07	1.88436e-09
GRM7	2917	Grm7	108073	glutamate receptor, metabotropic 7 [Source:HGNC Symbol;Acc:4599]	Tier 2	0	Y	N	N	VIP	6.0558	1.01262	5.2623	13.356	2.65056	0.000106801	9.1436e-06	0.228544	0.428023	0.290352	-1.19161	0.00337685	0.000552161	-2.42417	1.00089e-07	1.90901e-09	-3.85279	5.72352e-07	1.96621e-08	-1.42397	4.24603e-05	2.54778e-06
ASIC1	41	Asic1	11419	acid-sensing (proton-gated) ion channel 1 [Source:HGNC Symbol;Acc:100]	Tier 2	1	Y	Y	N	VIP	1.71945	2.57505	3.00786	16.8956	-0.670529	0.0509095	0.0183091	-0.887751	0.00546008	0.00101954	-3.23758	4.74349e-08	4.13952e-10	-0.220523	0.330755	0.209505	-2.57	4.3485e-08	7.3653e-10	-2.34047	2.60391e-08	2.56376e-10
MAP3K1	4214	Map3k1	26401	mitogen-activated protein kinase kinase kinase 1, E3 ubiquitin protein ligase [Source:HGNC Symbol;Acc:6848]	Tier 2	14	Y	N	N	VIP	0.653994	1.41408	0.56832	2.71048	-0.845328	0.175114	0.0892529	0.237909	0.67739	0.553015	-1.93924	0.0015968	0.000220419	1.0865	0.000435321	5.63233e-05	-1.1015	0.00382395	0.00105902	-2.1882	2.23664e-06	6.5372e-08
NPY1R	4886	Npy1r	18166	neuropeptide Y receptor Y1 [Source:HGNC Symbol;Acc:7956]	Tier 2	0	Y	Y	N	VIP	9.69526	0.10931	1.11075	29.7042	6.2002	2.72406e-06	9.8403e-08	3.22346	2.03739e-08	1.17719e-10	-1.50214	3.40467e-06	1.1364e-07	-2.9538	0.000210463	2.32024e-05	-7.70234	1.58919e-09	1.03109e-11	-4.72106	8.6071e-12	3.37407e-15
NPY2R	4887	Npy2r	18167	neuropeptide Y receptor Y2 [Source:HGNC Symbol;Acc:7957]	Tier 2	0	Y	Y	N	VIP	10.0881	0.845714	5.46789	40.5831	4.29755	7.08667e-05	5.53959e-06	1.00556	0.00239092	0.000363256	-1.77353	1.55084e-05	7.38859e-07	-3.28395	4.5075e-06	2.14783e-07	-6.07339	2.52127e-08	3.68495e-10	-2.77753	6.08966e-10	1.68643e-12
ENPP2	5168	Enpp2	18606	ectonucleotide pyrophosphatase/phosphodiesterase 2 [Source:HGNC Symbol;Acc:3357]	Tier 2	0	Y	Y	N	VIP	4.2056	4.83696	2.72879	15.1641	-0.490194	0.60907	0.483242	0.612951	0.437975	0.299521	-1.94443	0.0127078	0.00294708	1.08931	0.000653053	9.21559e-05	-1.45284	8.14554e-05	8.80088e-06	-2.53317	4.091e-08	4.30658e-10
PIK3R1	5295	Pik3r1	18708	phosphoinositide-3-kinase, regulatory subunit 1 (alpha) [Source:HGNC Symbol;Acc:8979]	Tier 2	0	Y	N	N	VIP	7.80047	6.03682	7.20984	16.3327	0.358794	0.058876	0.0220496	0.109761	0.526211	0.385699	-1.05869	1.66398e-05	8.0691e-07	-0.247407	0.0732617	0.0303332	-1.41663	1.20479e-07	2.7894e-09	-1.16554	4.9358e-07	9.50543e-09
ATR	545	Atr	245000	ataxia telangiectasia and Rad3 related [Source:HGNC Symbol;Acc:882]	Tier 2	0	Y	N	N	VIP	1.17065	0.759868	0.95	2.44458	0.65429	0.108305	0.0479149	0.408921	0.146479	0.0691585	-1.01389	0.00845783	0.00175845	-0.242441	0.384682	0.2569	-1.66596	0.000419186	6.46156e-05	-1.43038	8.2328e-05	5.76077e-06
PPOX	5498	Ppox	19044	protoporphyrinogen oxidase [Source:HGNC Symbol;Acc:9280]	Tier 2	0	Y	N	N	VIP	0.62565	0.3881	0.462549	1.60904	-0.430998	0.784368	0.695521	-0.66565	0.540404	0.400786	-2.24262	0.0353311	0.0110373	-0.274236	0.615301	0.489071	-1.82603	0.00608149	0.00188899	-1.55696	0.000456456	5.08493e-05
RXFP1	59350	Rxfp1	381489	relaxin/insulin-like family peptide receptor 1 [Source:HGNC Symbol;Acc:19718]	Tier 2	0	Y	Y	N	VIP	1.21554	0.0439317	0.264231	5.84016	3.58125	0.00333886	0.000620037	2.04413	0.000604065	6.54105e-05	-2.40317	1.3502e-05	6.19922e-07	-1.54614	0.0236927	0.00745083	-5.9876	6.05376e-07	2.12514e-08	-4.45078	1.31502e-09	4.83182e-12
RGS12	6002	Rgs12	71729	regulator of G-protein signaling 12 [Source:HGNC Symbol;Acc:9994]	Tier 2	0	Y	N	N	VIP	0.342751	0.417235	0.629716	8.99325	0.0218776	0.976758	0.961138	-0.730391	0.0515627	0.0176824	-4.55984	1.2941e-08	7.6709e-11	-0.751255	0.0698084	0.0284916	-4.58153	8.44952e-08	1.76484e-09	-3.82879	2.44255e-10	4.84003e-13
SLC5A7	60482	Slc5a7	63993	solute carrier family 5 (sodium/choline cotransporter), member 7 [Source:HGNC Symbol;Acc:14025]	Tier 2	0	Y	N	N	VIP	0	0.011369	0.193337	15.5802	0	1	1	-4.03498	0.000854429	0.000100297	-10.3871	7.04346e-08	7.68394e-10	-1.85963	0.0414617	0.0149465	-8.22688	1.72736e-07	4.4004e-09	-6.35356	3.30529e-09	1.45319e-11
RPS6KB2	6199	Rps6kb2	58988	ribosomal protein S6 kinase, 70kDa, polypeptide 2 [Source:HGNC Symbol;Acc:10437]	Tier 2	0	Y	N	N	VIP	1.06604	1.19363	1.24808	3.01434	-0.239904	0.778636	0.687767	-0.108157	0.868731	0.802697	-1.33534	0.0300604	0.00889984	0.129977	0.778548	0.684502	-1.09909	0.020512	0.00859171	-1.2178	0.00111508	0.000161507
SLC6A11	6538	Slc6a11	243616	solute carrier family 6 (neurotransmitter transporter), member 11 [Source:HGNC Symbol;Acc:11044]	Tier 2	0	Y	N	N	VIP	3.78441	2.12208	3.23267	8.07436	0.91125	0.281758	0.1674	0.19261	0.740564	0.634743	-1.28612	0.0256692	0.00725821	-0.729483	0.0210038	0.00639737	-2.18857	1.21683e-05	8.54326e-07	-1.4622	6.50848e-06	2.4228e-07
SLC18A3	6572	Slc18a3	20508	solute carrier family 18 (vesicular acetylcholine transporter), member 3 [Source:HGNC Symbol;Acc:10936]	Tier 2	0	Y	N	N	VIP	0	0	0	3.9883	0	1	1	0	1	1	-7.73605	4.8795e-07	8.95406e-09	0	1	1	-6.00027	2.64497e-06	1.29702e-07	-8.35017	1.45664e-07	1.99767e-09
TERT	7015	Tert	21752	telomerase reverse transcriptase [Source:HGNC Symbol;Acc:11730]	Tier 2	21	Y	N	N	VIP	0.0625543	0.133933	0.102967	0.331197	0	1	1	-0.372248	0.688223	0.567519	-2.21483	0.00613885	0.00116599	0.249396	0.79033	0.7003	-1.60519	0.0298655	0.0135988	-1.84236	0.0059812	0.00136113
UCHL3	7347	Uchl3	50933	ubiquitin carboxyl-terminal esterase L3 (ubiquitin thiolesterase) [Source:HGNC Symbol;Acc:12515]	Tier 2	0	Y	N	N	VIP	3.54594	2.50526	3.46405	10.2136	0.540625	0.292721	0.176113	-0.0199604	0.961104	0.939385	-1.6912	3.19016e-05	1.82462e-06	-0.555696	0.199216	0.107746	-2.23462	1.56953e-05	1.17107e-06	-1.66751	2.68286e-06	8.12382e-08
DGAT1	8694	Dgat1	13350	diacylglycerol O-acyltransferase 1 [Source:HGNC Symbol;Acc:2843]	Tier 2	0	Y	N	N	VIP	0.424302	1.70105	1.30415	3.02543	-1.72104	0.0689896	0.0268977	-1.63874	0.0192949	0.00500412	-2.90378	0.000308549	2.95941e-05	0.0598164	0.911515	0.862548	-1.1996	0.00981447	0.00343862	-1.25391	1.14546e-05	4.9297e-07
KCNB2	9312	Kcnb2	98741	potassium voltage-gated channel, Shab-related subfamily, member 2 [Source:HGNC Symbol;Acc:6232]	Tier 2	0	Y	N	N	VIP	4.33125	1.58411	4.36627	12.013	1.38381	0.00025773	2.67732e-05	-0.0129629	0.963228	0.942773	-1.48127	2.06778e-05	1.05749e-06	-1.39655	1.62802e-05	1.04893e-06	-2.86327	3.44994e-08	5.48994e-10	-1.47604	4.81401e-06	1.64551e-07
IL18BP	10068	Il18bp	16068	interleukin 18 binding protein [Source:HGNC Symbol;Acc:5987]	Tier 3B	0	N	Y	N	VIP	0.707342	0.326663	0.549896	2.92998	0.932482	0.538895	0.406995	-0.00888626	0.992945	0.988949	-2.32441	0.0060548	0.00114391	-0.971852	0.0917969	0.0401194	-3.26825	4.08641e-05	3.84304e-06	-2.30183	1.65709e-06	4.58679e-08
GPC6	10082	Gpc6	23888	glypican 6 [Source:HGNC Symbol;Acc:4454]	Tier 3A	1	N	Y	N	VIP	0.302569	1.20597	1.45047	4.18404	-1.65631	0.0877128	0.036483	-2.16577	0.00827364	0.00170831	-3.60448	0.000159662	1.33505e-05	-0.507858	0.136101	0.0661756	-1.9473	1.40565e-05	1.01987e-06	-1.4406	1.39091e-05	6.3088e-07
EDIL3	10085	Edil3	13612	EGF-like repeats and discoidin I-like domains 3 [Source:HGNC Symbol;Acc:3173]	Tier 3A	1	N	Y	N	VIP	11.4257	22.4525	30.8375	76.38	-0.990543	0.000272284	2.87168e-05	-1.39855	5.71338e-05	3.45237e-06	-2.63198	2.09738e-08	1.54744e-10	-0.412872	0.0891395	0.0386308	-1.64909	8.86015e-07	3.27369e-08	-1.23828	0.000162937	1.37723e-05
ANGPTL7	10218	Angptl7	654812	angiopoietin-like 7 [Source:HGNC Symbol;Acc:24078]	Tier 3B	2	N	Y	N	VIP	0.0480103	0.0847833	0.0941861	0.540701	0	1	1	-0.108654	0.947326	0.916299	-2.65776	0.0371918	0.0118133	0	1	1	-1.87367	0.0288755	0.013079	-2.54357	0.00407246	0.000833376
SEMA3C	10512	Sema3c	20348	sema domain, immunoglobulin domain (Ig), short basic domain, secreted, (semaphorin) 3C [Source:HGNC Symbol;Acc:10725]	Tier 3A	1	N	Y	N	VIP	1.06535	0.208313	2.84339	37.8016	1.91487	0.00758047	0.00168048	-1.62695	0.000287889	2.61296e-05	-5.12455	1.10422e-08	5.91868e-11	-3.52305	1.03092e-05	5.95292e-07	-7.04388	2.46291e-07	6.84608e-09	-3.50147	1.69692e-08	1.42907e-10
LECT1	11061	Cnmd	16840	leukocyte cell derived chemotaxin 1 [Source:HGNC Symbol;Acc:17005]	Tier 3B	0	N	Y	N	VIP	0.0677482	0	0.0293213	3.85176	0	1	1	0	1	1	-5.03283	0.000389146	3.916e-05	0	1	1	-4.57029	1.44021e-05	1.05443e-06	-6.44656	6.35435e-08	7.15485e-10
FKBP9	11328	Fkbp9	27055	FK506 binding protein 9, 63 kDa [Source:HGNC Symbol;Acc:3725]	Tier 3B	0	Y	N	N	VIP	1.41171	0.877587	1.64387	6.15222	0.42395	0.698965	0.58863	-0.46583	0.511822	0.37097	-2.48497	0.000942488	0.000115122	-0.867406	0.0457707	0.0169589	-2.90794	2.81108e-06	1.38807e-07	-2.02588	4.65031e-07	8.84046e-09
VASN	114990	Vasn	246154	vasorin [Source:HGNC Symbol;Acc:18517]	Tier 3B	0	N	Y	N	VIP	0.692636	0.397551	0.418822	1.40412	0.588171	0.509287	0.376059	0.508838	0.399577	0.263465	-1.28861	0.0194494	0.00509354	-0.0818028	0.908504	0.858604	-1.88205	0.00187457	0.000436828	-1.79551	6.28228e-05	4.11194e-06
COL4A1	1282	Col4a1	12826	collagen, type IV, alpha 1 [Source:HGNC Symbol;Acc:2202]	Tier 3A	1	N	Y	N	VIP	0.548957	0.232904	0.372392	1.28026	0.808365	0.355881	0.229494	0.592458	0.300227	0.179203	-1.40486	0.0116272	0.00263808	-0.222623	0.670987	0.553211	-2.21885	0.000169679	2.14387e-05	-2.00133	1.09678e-05	4.63189e-07
COL4A2	1284	Col4a2	12827	collagen, type IV, alpha 2 [Source:HGNC Symbol;Acc:2203]	Tier 3A	1	N	Y	N	VIP	0.747233	0.322496	0.621225	1.71313	1.1352	0.117533	0.0532949	0.526235	0.216166	0.115912	-1.12972	0.0323654	0.00982175	-0.595323	0.201423	0.109484	-2.27019	0.00192427	0.000450774	-1.65525	0.000299521	2.96201e-05
COL6A3	1293	Col6a3	12835	collagen, type VI, alpha 3 [Source:HGNC Symbol;Acc:2213]	Tier 3A	0	N	Y	N	VIP	0.0332735	0	0.0518615	0.327906	0	1	1	-1.00902	0.280454	0.163633	-3.60383	0.000468629	4.9026e-05	-1.55184	0.0327824	0.0111538	-4.15368	2.8662e-05	2.49779e-06	-2.57588	2.56191e-05	1.34053e-06
COL7A1	1294	Col7a1	12836	collagen, type VII, alpha 1 [Source:HGNC Symbol;Acc:2214]	Tier 3B	0	N	Y	N	VIP	0.00866414	0	0.0225977	0.104715	0	1	1	0	1	1	-2.83591	0.00870971	0.00183114	0	1	1	-1.73953	0.0257026	0.0113785	-1.89018	0.0119575	0.00332461
COL15A1	1306	Col15a1	12819	collagen, type XV, alpha 1 [Source:HGNC Symbol;Acc:2192]	Tier 3B	1	N	Y	N	VIP	0.0635248	0	0.0547047	1.84969	0	1	1	0.202795	0.881304	0.821448	-4.981	9.46624e-05	7.03193e-06	0	1	1	-5.93366	3.20191e-06	1.61783e-07	-5.16929	2.55071e-07	3.93291e-09
CP	1356	Cp	12870	ceruloplasmin (ferroxidase) [Source:HGNC Symbol;Acc:2295]	Tier 3A	1	N	Y	N	VIP	0.353156	0.630004	0.335541	7.75417	-0.694693	0.456793	0.324639	-0.0656654	0.941859	0.907688	-4.71565	1.68841e-06	4.5037e-08	0.629236	0.272543	0.162254	-4.03205	7.21684e-07	2.6123e-08	-4.64478	5.38219e-09	3.05165e-11
COL26A1	136227	Col26a1	140709	collagen, type XXVI, alpha 1 [Source:HGNC Symbol;Acc:18038]	Tier 3A	0	N	Y	N	VIP	0	0.311695	0.180448	0.990431	0	1	1	-2.7171	0.0391105	0.0123903	-5.78649	2.76136e-06	8.49757e-08	1.4712	0.129361	0.062133	-1.58895	0.00588268	0.00181117	-3.03643	0.000678799	8.43612e-05
CRH	1392	Crh	12918	corticotropin releasing hormone [Source:HGNC Symbol;Acc:2355]	Tier 3B	0	N	Y	N	VIP	0.124292	0.260879	4.00718	101.735	0	1	1	-5.37164	2.53989e-05	1.27529e-06	-9.79699	1.2941e-08	7.64188e-11	-4.03096	3.34278e-05	2.58098e-06	-8.47516	1.34608e-09	8.27398e-12	-4.43096	5.70743e-11	7.77531e-14
SERPINA12	145264	Serpina12	68054	serpin peptidase inhibitor, clade A (alpha-1 antiproteinase, antitrypsin), member 12 [Source:HGNC Symbol;Acc:18359]	Tier 3A	0	N	Y	N	VIP	0	0	0.102933	0.332023	0	1	1	-3.17101	0.00101138	0.000124544	-5.06279	7.25725e-06	2.84194e-07	-1.43395	0.0468852	0.0174732	-3.32233	7.41584e-05	7.87065e-06	-1.89657	0.000892501	0.000121153
CNTN4	152330	Cntn4	269784	contactin 4 [Source:HGNC Symbol;Acc:2174]	Tier 3A	2	N	Y	N	VIP	2.5791	6.48183	10.9456	33.4346	-1.38196	0.00229748	0.000394593	-2.01355	2.09305e-05	9.99097e-07	-3.49634	1.4964e-07	1.91555e-09	-0.637043	0.00575264	0.00129743	-2.1166	4.48557e-07	1.46741e-08	-1.47665	9.65265e-06	3.939e-07
CXADR	1525	Cxadr	13052	coxsackie virus and adenovirus receptor [Source:HGNC Symbol;Acc:2559]	Tier 3B	0	N	Y	N	VIP	1.11314	1.70142	4.26522	9.64664	-0.563051	0.412141	0.28103	-1.92395	0.000676664	7.54595e-05	-3.14359	1.68958e-05	8.26783e-07	-1.3523	2.49834e-05	1.77505e-06	-2.58237	8.14827e-07	2.97246e-08	-1.23695	0.000126969	1.00559e-05
FREM1	158326	Frem1	329872	FRAS1 related extracellular matrix 1 [Source:HGNC Symbol;Acc:23399]	Tier 3A	0	N	Y	N	VIP	0.0290239	0.0426245	0.0112116	1.09516	0	1	1	0	1	1	-5.35881	0.000218385	1.96113e-05	0	1	1	-4.54196	0.000276372	3.89208e-05	-6.56193	1.43447e-05	6.56433e-07
ALDH1L2	160428	Aldh1l2	216188	aldehyde dehydrogenase 1 family, member L2 [Source:HGNC Symbol;Acc:26777]	Tier 3B	0	Y	N	N	VIP	0.419695	0.704819	0.813513	2.20983	-0.265262	0.741907	0.642659	-0.814523	0.0652033	0.0240516	-2.35778	0.00047047	4.92483e-05	-0.541805	0.25229	0.146922	-2.10146	0.00303389	0.000800846	-1.54174	0.000305602	3.03728e-05
BMPER	168667	Bmper	73230	BMP binding endothelial regulator [Source:HGNC Symbol;Acc:24154]	Tier 3B	0	N	Y	N	VIP	0.798544	0.427879	2.57527	6.61676	0.659655	0.605785	0.479717	-2.14202	0.00502534	0.000917961	-3.6507	2.61339e-05	1.42057e-06	-2.79381	0.000228865	2.59211e-05	-4.31432	2.98923e-07	8.61533e-09	-1.51201	1.73795e-05	8.30823e-07
ADAMTS16	170690	Adamts16	271127	ADAM metallopeptidase with thrombospondin type 1 motif, 16 [Source:HGNC Symbol;Acc:17108]	Tier 3B	0	N	Y	N	VIP	0.0149201	0.099704	0.148129	0.479328	0	1	1	-2.89561	0.00546426	0.00102066	-4.70609	0.000140315	1.14798e-05	-0.760419	0.337394	0.215435	-2.57853	0.00301748	0.000794659	-1.81696	0.000356519	3.6984e-05
EDN3	1908	Edn3	13616	endothelin 3 [Source:HGNC Symbol;Acc:3178]	Tier 3B	0	N	Y	N	VIP	0.211756	0.0205886	0	3.2885	0	1	1	0	1	1	-4.18401	0.000257775	2.37651e-05	0	1	1	-4.89963	3.85925e-05	3.59252e-06	-7.60524	8.06703e-07	1.77835e-08
FBLN2	2199	Fbln2	14115	fibulin 2 [Source:HGNC Symbol;Acc:3601]	Tier 3A	2	N	Y	N	VIP	0.413369	0.0687934	0.300429	6.02633	2.05524	0.0302403	0.0094666	0.617464	0.319713	0.195272	-3.72222	4.72414e-07	8.57959e-09	-1.43696	0.117886	0.0549751	-5.77873	2.56432e-06	1.24346e-07	-4.33715	1.00902e-07	1.26838e-09
FBN1	2200	Fbn1	14118	fibrillin 1 [Source:HGNC Symbol;Acc:3603]	Tier 3A	1	N	Y	N	VIP	0.68159	0.530147	0.336289	1.59292	0.398136	0.459794	0.327754	0.891093	0.0226676	0.00611176	-1.26602	0.00173116	0.000244984	0.49601	0.0949446	0.0419431	-1.66983	2.9227e-05	2.56499e-06	-2.16024	2.57169e-08	2.50019e-10
ANGPTL2	23452	Angptl2	26360	angiopoietin-like 2 [Source:HGNC Symbol;Acc:490]	Tier 3B	0	N	Y	N	VIP	0.217362	0.358594	0.246299	0.891854	-0.900518	0.451351	0.319683	-0.119032	0.931371	0.892564	-2.10522	0.0308559	0.00922485	0.780066	0.337702	0.215676	-1.21351	0.0269094	0.0120212	-1.97701	0.00470765	0.00100403
COL24A1	255631	Col24a1	71355	collagen, type XXIV, alpha 1 [Source:HGNC Symbol;Acc:20821]	Tier 3A	0	N	Y	N	VIP	0.0805969	0.259674	0.0182448	2.02534	0	1	1	0	1	1	-5.4268	6.4127e-05	4.3916e-06	0	1	1	-3.08429	0.000420854	6.49877e-05	-7.03057	1.3405e-06	3.46144e-08
SOSTDC1	25928	Sostdc1	66042	sclerostin domain containing 1 [Source:HGNC Symbol;Acc:21748]	Tier 3A	0	N	Y	N	VIP	0.67053	2.492	0.739467	8.65169	-2.18004	0.0554877	0.0204183	-0.989143	0.322644	0.197598	-4.59198	4.54547e-05	2.88356e-06	1.17549	0.0345392	0.0119077	-2.42686	5.01004e-05	4.89607e-06	-3.58747	2.32236e-08	2.15928e-10
PVRL3	25945	Nectin3	58998	poliovirus receptor-related 3 [Source:HGNC Symbol;Acc:17664]	Tier 3B	0	N	Y	N	VIP	1.79742	1.60653	2.34026	7.27056	0.285365	0.627576	0.505428	-0.225088	0.592142	0.456901	-1.82805	0.00128591	0.000167935	-0.50806	0.207937	0.114252	-2.11573	0.000888976	0.000169878	-1.61035	0.000549008	6.41743e-05
EGFL6	25975	Egfl6	54156	EGF-like-domain, multiple 6 [Source:HGNC Symbol;Acc:3235]	Tier 3B	0	N	Y	N	VIP	0.258391	0.337257	0.486557	1.13742	0	1	1	-1.51441	0.0742754	0.0286304	-2.72388	0.00564251	0.00104325	-0.62791	0.401396	0.271824	-1.84935	0.0256431	0.0113469	-1.20113	0.00431268	0.000898376
CACNG5	27091	Cacng5	140723	calcium channel, voltage-dependent, gamma subunit 5 [Source:HGNC Symbol;Acc:1409]	Tier 3B	0	Y	N	N	VIP	3.09107	0.135066	5.43228	17.4944	4.12963	0.000656009	8.50086e-05	-0.957369	0.00910508	0.00192113	-2.5791	3.50369e-06	1.17762e-07	-5.09722	8.07206e-08	1.43379e-09	-6.70671	1.63699e-07	4.12545e-09	-1.61051	4.8135e-06	1.64235e-07
SIGLEC8	27181	Siglecf	233186	sialic acid binding Ig-like lectin 8 [Source:HGNC Symbol;Acc:10877]	Tier 3B	0	N	Y	N	VIP	0.0289864	0	0.0332189	0.488924	0	1	1	0	1	1	-3.63774	0.00173768	0.000246873	0	1	1	-3.24251	0.000713727	0.000127361	-3.38006	0.000395109	4.21068e-05
ANGPTL3	27329	Angptl3	30924	angiopoietin-like 3 [Source:HGNC Symbol;Acc:491]	Tier 3A	22	N	Y	N	VIP	0.101478	0	0.184665	0.598076	0	1	1	-0.209799	0.90179	0.850425	-2.55703	0.0401509	0.013014	0	1	1	-1.99237	0.0446856	0.0222665	-2.34096	0.022623	0.00753959
RSPO1	284654	Rspo1	192199	R-spondin 1 [Source:HGNC Symbol;Acc:21679]	Tier 3B	1	N	Y	N	VIP	0.23006	0	0.141703	2.46183	0	1	1	0	1	1	-3.99958	0.000196641	1.73478e-05	0	1	1	-4.694	8.33101e-06	5.35388e-07	-4.02292	4.51884e-07	8.45062e-09
GRPR	2925	Grpr	14829	gastrin-releasing peptide receptor [Source:HGNC Symbol;Acc:4609]	Tier 3B	0	Y	Y	N	VIP	0.095176	0.0438564	1.04611	81.4621	0	1	1	-3.59485	0.00526883	0.000973715	-9.72515	5.17456e-08	4.71388e-10	-3.07422	0.0106026	0.0027686	-9.16656	2.68079e-08	3.97457e-10	-6.1368	1.88313e-09	7.17324e-12
KCNT2	343450	Kcnt2	240776	potassium channel, subfamily T, member 2 [Source:HGNC Symbol;Acc:18866]	Tier 3A	2	Y	N	N	VIP	8.85556	0.541741	2.7259	45.5068	4.67053	1.24364e-06	3.66054e-08	1.66153	3.67193e-05	2.00944e-06	-2.21474	2.77067e-05	1.52354e-06	-3.004	2.31778e-05	1.61335e-06	-6.89656	4.6419e-07	1.5249e-08	-3.88048	6.3091e-08	7.03225e-10
RSPO4	343637	Rspo4	228770	R-spondin 4 [Source:HGNC Symbol;Acc:16175]	Tier 3B	0	N	Y	N	VIP	0	0	0	0.823864	0	1	1	0	1	1	-5.90873	1.84616e-06	5.01762e-08	0	1	1	-4.17408	1.41606e-05	1.03192e-06	-6.78849	8.90542e-08	1.07533e-09
CD46	4179	Cd46	17221	CD46 molecule, complement regulatory protein [Source:HGNC Symbol;Acc:6953]	Tier 3A	6	N	Y	N	VIP	0.800174	0.309637	0.549529	2.20189	1.62211	0.177049	0.0904697	0.461706	0.462046	0.321676	-1.55853	0.0447392	0.0149751	-1.14433	0.0841908	0.035933	-3.1846	0.00804672	0.00267748	-2.01728	0.00118066	0.000174295
MSR1	4481	Msr1	20288	macrophage scavenger receptor 1 [Source:HGNC Symbol;Acc:7376]	Tier 3B	0	N	Y	N	VIP	0.0218253	0.0144537	0.217243	1.15927	0	1	1	-2.50378	0.0557401	0.019636	-4.55068	0.0025262	0.00038758	-1.89146	0.0250631	0.00797216	-3.90518	0.00101547	0.000201251	-2.00493	0.00225835	0.000397503
TNFRSF11B	4982	Tnfrsf11b	18383	tumor necrosis factor receptor superfamily, member 11b [Source:HGNC Symbol;Acc:11909]	Tier 3A	10	N	Y	N	VIP	0.0424631	0	0.241157	0.548729	0	1	1	-2.16782	0.0377059	0.011838	-3.48383	0.0018737	0.000270101	-2.20641	0.00454916	0.000969731	-3.52494	7.77805e-05	8.33477e-06	-1.32032	0.0109292	0.00295669
OVGP1	5016	Ovgp1	12659	oviductal glycoprotein 1, 120kDa [Source:HGNC Symbol;Acc:8524]	Tier 3B	0	N	Y	N	VIP	0.114606	0.0433005	0.081835	0.806651	0	1	1	0.217842	0.888005	0.830992	-2.91343	0.0295765	0.00871554	0	1	1	-2.27745	0.037912	0.0182077	-3.11725	0.00481851	0.00103507
PLA2G3	50487	Pla2g3	237625	phospholipase A2, group III [Source:HGNC Symbol;Acc:17934]	Tier 3B	0	N	Y	N	VIP	0.128743	0.149143	0.0744742	0.533857	-0.487608	0.703258	0.594559	0.753429	0.436378	0.298132	-2.02726	0.0154267	0.00376204	1.22118	0.119475	0.0559904	-1.54403	0.0270248	0.012082	-2.77054	1.83202e-05	8.90541e-07
PCSK1	5122	Pcsk1	18548	proprotein convertase subtilisin/kexin type 1 [Source:HGNC Symbol;Acc:8743]	Tier 3A	3	N	Y	N	VIP	3.40646	0.783813	4.98403	18.1465	1.77915	0.00639615	0.001369	-0.650151	0.0643758	0.0236627	-2.44096	5.3485e-06	1.94607e-07	-2.4292	3.57952e-05	2.80365e-06	-4.21437	5.30388e-07	1.7967e-08	-1.80688	1.64032e-05	7.66886e-07
SERPINE2	5270	Serpine2	20720	serpin peptidase inhibitor, clade E (nexin, plasminogen activator inhibitor type 1), member 2 [Source:HGNC Symbol;Acc:8951]	Tier 3B	0	N	Y	N	VIP	6.01745	7.01919	20.1187	45.7101	0.278656	0.703653	0.595052	-1.56118	0.00125506	0.000163882	-2.72629	4.62463e-06	1.62839e-07	-1.85161	0.000286907	3.39617e-05	-2.96926	2.2819e-06	1.06443e-07	-1.15291	8.0215e-05	5.57318e-06
PNOC	5368	Pnoc	18155	prepronociceptin [Source:HGNC Symbol;Acc:9163]	Tier 3B	0	N	Y	N	VIP	0.54456	1.17529	2.81329	9.37749	-1.30095	0.188871	0.0981784	-2.57623	0.00119525	0.000154213	-4.14715	2.53101e-05	1.36572e-06	-1.31431	0.0131432	0.00358967	-2.84877	6.23209e-05	6.41852e-06	-1.55269	4.70429e-05	2.89849e-06
CPXM1	56265	Cpxm1	56264	carboxypeptidase X (M14 family), member 1 [Source:HGNC Symbol;Acc:15771]	Tier 3A	0	N	Y	N	VIP	0.213502	0.19289	0.70697	1.39465	0	1	1	-1.18764	0.114329	0.0501005	-2.48387	0.000867589	0.000104441	-1.11515	0.158779	0.0804563	-2.40727	0.00111806	0.00022849	-1.3002	0.0109292	0.00295682
HTRA1	5654	Htra1	56213	HtrA serine peptidase 1 [Source:HGNC Symbol;Acc:9476]	Tier 3A	14	N	Y	N	VIP	0.70817	3.60229	2.74265	7.98705	-2.5239	0.00348526	0.000653441	-2.09319	0.0104628	0.00229375	-3.62124	0.000106124	8.06406e-06	0.461195	0.160119	0.0813409	-1.08334	0.000761807	0.000140114	-1.54795	3.20273e-05	1.78491e-06
FSTL5	56884	Fstl5	213262	follistatin-like 5 [Source:HGNC Symbol;Acc:21386]	Tier 3A	0	N	Y	N	VIP	1.26652	3.70418	13.9826	29.5646	-1.75631	0.00353273	0.000664564	-3.77344	2.18701e-07	2.88406e-09	-4.91092	1.3937e-08	8.61285e-11	-2.01899	6.38804e-08	1.06767e-09	-3.15141	8.59626e-10	4.10967e-12	-1.13954	2.09442e-06	6.05668e-08
TRPC7	57113	Trpc7	26946	transient receptor potential cation channel, subfamily C, member 7 [Source:HGNC Symbol;Acc:20754]	Tier 3B	0	Y	N	N	VIP	0.219477	0.155743	0.690687	1.41377	0.683367	0.597853	0.470057	-1.59695	0.0236089	0.00643574	-2.7116	0.00113645	0.000143472	-2.20139	0.00946198	0.00240084	-3.38997	0.00104068	0.000208107	-1.12169	0.00410662	0.000842736
PTPRZ1	5803	Ptprz1	19283	protein tyrosine phosphatase, receptor-type, Z polypeptide 1 [Source:HGNC Symbol;Acc:9685]	Tier 3B	0	Y	Y	N	VIP	9.73826	3.04201	6.06059	32.4264	1.63977	0.000379047	4.30599e-05	0.799333	0.00527393	0.000975931	-1.7248	7.8929e-06	3.16552e-07	-0.842909	0.000510124	6.82751e-05	-3.3544	1.04709e-09	5.93558e-12	-2.5286	2.32243e-10	4.17057e-13
JAM2	58494	Jam2	67374	junctional adhesion molecule 2 [Source:HGNC Symbol;Acc:14686]	Tier 3A	0	N	Y	N	VIP	1.72819	1.57459	0.947959	5.79436	0.698142	0.267915	0.156682	1.17689	0.00968179	0.00207578	-1.34472	0.0027212	0.000423504	0.472587	0.14182	0.0697434	-2.031	1.21046e-05	8.49024e-07	-2.52451	1.88313e-09	7.3464e-12
REV3L	5980	Rev3l	19714	REV3-like, polymerase (DNA directed), zeta, catalytic subunit [Source:HGNC Symbol;Acc:9968]	Tier 3B	6	Y	N	N	VIP	7.99804	4.2325	7.11702	15.83	1.00543	0.00417257	0.00081599	0.316045	0.234592	0.129069	-1.03001	0.0128718	0.00299919	-0.699422	6.25265e-05	5.42194e-06	-2.04478	2.43364e-05	2.0211e-06	-1.3444	0.000318199	3.20386e-05
PROK2	60675	Prok2	50501	prokineticin 2 [Source:HGNC Symbol;Acc:18455]	Tier 3B	0	N	Y	N	VIP	0	0	0.342225	1.95441	0	1	1	-3.28168	0.000304482	2.79561e-05	-5.7876	7.30318e-06	2.86453e-07	-1.28896	0.0364532	0.0127243	-3.79119	0.000124618	1.47655e-05	-2.49046	7.00948e-05	4.69642e-06
CCL13	6357	Ccl2	20296	chemokine (C-C motif) ligand 13 [Source:HGNC Symbol;Acc:10611]	Tier 3B	0	N	Y	N	VIP	0.218805	0	0.481372	1.09228	0	1	1	0	1	1	-2.23649	0.0294786	0.0086764	0	1	1	-2.73257	0.000474637	7.67939e-05	-1.14182	0.0120293	0.00335742
SMOC1	64093	Smoc1	64075	SPARC related modular calcium binding 1 [Source:HGNC Symbol;Acc:20318]	Tier 3A	4	N	Y	N	VIP	0	0.263167	0.287906	2.22124	0	1	1	-3.19419	0.00543288	0.00101312	-6.16863	2.65129e-05	1.44284e-06	-0.2397	0.765777	0.668154	-3.24241	0.000259029	3.59941e-05	-2.97907	5.69464e-07	1.12068e-08
[truncated: 23 more rows]

## Sheet: Figure 1-4
Human.Symbol	Human.EntrezID	Mouse.Symbol	Mouse.EntrezID	Description	Druggability.Tier	No.of.GWAS.regions	Small.Mol.Druggable	Bio.Druggable	ADME.gene	Neuron.subtypes.pairs	rpkm.EXC	rpkm.PV	rpkm.SST	rpkm.VIP	lfc.EXC.vs.PV	adj.p.EXC.vs.PV	pval.EXC.vs.PV	lfc.EXC.vs.SST	adj.p.EXC.vs.SST	pval.EXC.vs.SST	lfc.EXC.vs.VIP	adj.p.EXC.vs.VIP	pval.EXC.vs.VIP	lfc.PV.vs.SST	adj.p.PV.vs.SST	pval.PV.vs.SST	lfc.PV.vs.VIP	adj.p.PV.vs.VIP	pval.PV.vs.VIP	lfc.SST.vs.VIP	adj.p.SST.vs.VIP	pval.SST.vs.VIP
[truncated: 1,446 more rows]

[truncated: 2 more sheets: Figure 2-1, Figure 2-2]
